# Supplementary material for: Precipitation pattern in the Western Himalayas revealed by four datasets
Source: Copernicus journal article supplement (doi:10.5194/hess-22-5097-2018), 2018-10-04
Supplement: Supplementary file 1 [file hess-22-5097-2018-supplement.zip]

Archive with 44 entries (43 files):
- slashbox.sty
- hess-22-5097-2018-supplement-title-page.pdf
- copernicus.bst
- wrf_namelist.txt
- fig/
- fig/plot_WinSpatialTrend_done.png
- fig/WinSpatialTrend_hist.RData
- fig/winterHGT_Tp_Diff.png
- fig/ncdc.png
- fig/Bhuntar_annual_pre.png
- fig/zon_mer_mean.png
- fig/SumSpatialTrend_hist.png
- fig/resample_AnnualSpatial.png
- fig/AnnualSpatial.png
- fig/winterHGT_T2_WRF.png
- fig/annual_Spatial_hist.png
- fig/Bhuntar_month_pre.png
- fig/SmallBox_done.png
- fig/MonPrec.png
- fig/plot_SumSpatialTrend_done.png
- fig/acc_prec_disc.png
- fig/zon.png
- fig/StudyArea.png
- fig/AnnualPrecipitation_hist.png
- fig/WinSpatialTrend_hist.png
- fig/Tp_SpatialSeason_done.png
- fig/winterHGT_T2_APHRO.png
- fig/summerHGT_Tp_Diff.png
- template.fls
- template.blg
- library.bib
- template.bbl
- pdfscreencop.sty
- template.tex
- template.synctex.gz
- copernicus.cls
- template.fdb_latexmk
- pdfscreen.sty
- natbib.sty
- template.aux
- copernicus.cfg
- README_copernicus_package_4_3.txt
- template.log
- template.pdf
