# Supplementary material for: Precipitation pattern in the Western Himalayas revealed by four datasets
Source: Copernicus journal article supplement (doi:10.5194/hess-22-5097-2018), 2018-10-04
Supplement: Supplementary file 1 [file hess-22-5097-2018-supplement.zip › hess-22-5097-2018-supplement-title-page.pdf]

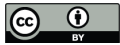

## *Supplement of*

# **Precipitation pattern in the Western Himalayas revealed by four datasets**

**Hong Li et al.**

*Correspondence to:* Hong Li (lihong2291@gmail.com)

- hess-22-5097-2018-supplement-title-page.pdf
- README\_copernicus\_package\_4\_3.txt
- copernicus.bst
- copernicus.cfg
- copernicus.cls
- fig
  - AnnualPrecipitation\_hist.png
  - AnnualSpatial.png
  - Bhuntar\_annual\_pre.png
  - Bhuntar\_month\_pre.png
  - MonPrec.png
  - SmallBox\_done.png
  - StudyArea.png
  - SumSpatialTrend\_hist.png
  - Tp\_SpatialSeason\_done.png
  - WinSpatialTrend\_hist.RData
  - WinSpatialTrend\_hist.png
  - acc\_prec\_disc.png
  - annual\_Spatial\_hist.png
  - ncdc.png
  - plot\_SumSpatialTrend\_done.png
  - plot\_WinSpatialTrend\_done.png
  - resample\_AnnualSpatial.png
  - summerHGT\_Tp\_Diff.png

- winterHGT\_T2\_APHRO.png
  - winterHGT\_T2\_WRF.png
  - winterHGT\_Tp\_Diff.png
  - zon.png
  - zon\_mer\_mean.png
- library.bib
- natbib.sty
- pdfscreen.sty
- pdfscreen.sty
- slashbox.sty
- template.aux
- template.bbl
- template.blg
- template.fdb\_latexmk
- template.flx
- template.log
- template.pdf
- template.synctex.gz
- template.tex
- wrf\_namelist.txt

The copyright of individual parts of the supplement might differ from the CC BY 3.0 License.
