# Supplementary material for: Precipitation pattern in the Western Himalayas revealed by four datasets
Source: Copernicus journal article supplement (doi:10.5194/hess-22-5097-2018), 2018-10-04
Supplement: Supplementary file 1 [file hess-22-5097-2018-supplement.zip › library.bib]

Automatically generated by Mendeley Desktop 1.16.3
Any changes to this file will be lost if it is regenerated by Mendeley.

BibTeX export options can be customized via Options -> BibTeX in Mendeley Desktop

@article{Adler2003,
author = {Adler, Robert F. and Huffman, George J. and Chang, Alfred and Ferraro, Ralph and Xie, Ping-Ping and Janowiak, John and Rudolf, Bruno and Schneider, Udo and Curtis, Scott and Bolvin, David and Gruber, Arnold and Susskind, Joel and Arkin, Philip and Nelkin, Eric},
doi = {10.1175/1525-7541},
journal = {American Meteorological Society},
pages = {1147--1167},
title = {{The Version-2 Global Precipitation Climatology Project (GPCP) Monthly Precipitation Analysis (1979–Present)}},
url = {http://journals.ametsoc.org/doi/pdf/10.1175/1525-7541{\%}282003{\%}29004{\%}3C1147{\%}3ATVGPCP{\%}3E2.0.CO{\%}3B2},
volume = {4},
year = {2003}
}
@techreport{Purohit2016,
author = {Purohit, M. K. and Kau, Surinder},
institution = {India Meteorological Department},
pages = {12},
title = {{Rainfall Statistics of India - 2016}},
url = {http://hydro.imd.gov.in/hydrometweb/(S(0rlpja453hfxgw45x041xyqr))/PRODUCTS/Publications/Rainfall Statistics of India - 2016/Rainfall Statistics of India - 2016.pdf{\#}page=1{\&}zoom=auto,-411,842},
year = {2016}
}

@article{Sugiura2006,
abstract = {Abstract Intercomparison of solid precipitation measurement at Barrow, Alaska, has been carried out to examine the catch characteristics of various precipitation gauges in high-latitude regions with high winds and to evaluate the applicability of the WMO precipitation correction procedures. Five manual precipitation gauges (Canadian Nipher, Hellmann, Russian Tretyakov, U.S. 8-in., and Wyoming gauges) and a double fence intercomparison reference (DFIR) as an international reference standard have been installed. The data collected in the last three winters indicates that the amount of solid precipitation is characteristically low, and the zero-catch frequency of the nonshielded gauges is considerably high, 60{\%}?80{\%} of precipitation occurrences. The zero catch in high-latitude high-wind regions becomes a significant fraction of the total precipitation. At low wind speeds, the catch characteristics of the gauges are roughly similar to the DFIR, although it is noteworthy that the daily catch ratios decreased more rapidly with increasing wind speed compared to the WMO correction equations. The dependency of the daily catch ratios on air temperature was confirmed, and the rapid decrease in the daily catch ratios is due to small snow particles caused by the cold climate. The daily catch ratio of the Wyoming gauge clearly shows wind-induced losses. In addition, the daily catch ratios are considerably scattered under strong wind conditions due to the influence of blowing snow. This result suggests that it is not appropriate to extrapolate the WMO correction equations for the shielded gauges in high-latitude regions for high wind speed of over 6 m s?1.},
annote = {precipitation undercatch in windy and high latitude areas},
author = {Sugiura, Konosuke and Ohata, Tetsuo and Yang, Daqing},
doi = {10.1175/JHM542.1},
issn = {1525-755X},
journal = {Journal of Hydrometeorology},
month = {oct},
number = {5},
pages = {984--994},
publisher = {American Meteorological Society},
title = {{Catch Characteristics of Precipitation Gauges in High-Latitude Regions with High Winds}},
url = {http://dx.doi.org/10.1175/JHM542.1},
volume = {7},
year = {2006}
}
@article{Hegdahl2016,
abstract = {Snow- and glacier melt are important contributors to river discharge in high-elevated areas of the Himalayan region. Thus, it is important that the key processes controlling snow and glacier accumulation and melting, are well represented in hydrological models. In this study, the sensitivity of modelled discharge to different snowmelt parameterizations was evaluated. A distributed hydrological model that operated on a 1 × 1 km2 grid at a daily time resolution was applied to a high-elevated mountainous basin, the Upper Beas basin in Indian Himalaya, including several sub-basins with a varying degree of glacier covered areas. The snowmelt was calculated using (i) a temperature-index method, (ii) an enhanced temperature-index method including a shortwave radiation term, and (iii) an energy balance method. All model configurations showed similar performance at daily, seasonal, and annual timescales and a lower performance for the validation period than for the calibration period; a main reason being the failure to capture the observed negative trend in annual discharge in the validation period. The results suggest that model performance is more sensitive to the precipitation input, i.e. interpolation method than to the choice of snowmelt routine. The paper highlights the challenges related to the lack of high quality datasets in mountainous regions, which are those areas globally with most water resources.},
author = {Hegdahl, Trine J and Tallaksen, Lena M and Engeland, Kolbj{\o}rn and Burkhart, John F and Xu, Chong-Yu},
journal = {Hydrology Research},
month = {feb},
title = {{Discharge sensitivity to snowmelt parameterization: a case study for Upper Beas basin in Himachal Pradesh, India}},
url = {http://hr.iwaponline.com/content/early/2016/02/19/nh.2016.047.abstract},
year = {2016}
}
@article{Engeset2003,
abstract = {Snowmelt can be a significant contributor to major floods, and hence updated snow information is very important to flood forecasting services. This study assesses whether operational runoff simulations could be improved by applying satellite-derived snow covered area (SCA) from both optical and radar sensors. Currently the HBV model is used for runoff forecasting in Norway, and satellite-observed SCA is used qualitatively but not directly in the model. Three catchments in southern Norway are studied using data from 1995 to 2002. The results show that satellite-observed SCA can be used to detect when the models do not simulate the snow reservoir correctly. Detecting errors early in the snowmelt season will help the forecasting services to update and correct the models before possible damaging floods. The method requires model calibration against SCA as well as runoff. Time-series from the satellite sensors NOAA AVHRR and ERS SAR are used. Of these, AVHRR shows good correlation with the simulated SCA, and SAR less so. Comparison of simultaneous data from AVHRR, SAR and Landsat ETM+ for May 2000 shows good inter-correlation. Of a total satellite-observed area of 1,088 km2, AVHRR observed a SCA of 823 km2 and SAR 720 km2, as compared to 889 km2 using ETM+.},
author = {Engeset, R V and Udn{\ae}s, H-C. and Guneriussen, T and Koren, H and Malnes, E and Solberg, R and Alfnes, E},
journal = {Hydrology Research},
month = {aug},
number = {4},
pages = {281 LP  -- 294},
title = {{Improving Runoff Simulations using Satellite-observed Time-series of Snow Covered Area}},
url = {http://hr.iwaponline.com/content/34/4/281.abstract},
volume = {34},
year = {2003}
}
@article{Sugiura2006a,
abstract = {Abstract Intercomparison of solid precipitation measurement at Barrow, Alaska, has been carried out to examine the catch characteristics of various precipitation gauges in high-latitude regions with high winds and to evaluate the applicability of the WMO precipitation correction procedures. Five manual precipitation gauges (Canadian Nipher, Hellmann, Russian Tretyakov, U.S. 8-in., and Wyoming gauges) and a double fence intercomparison reference (DFIR) as an international reference standard have been installed. The data collected in the last three winters indicates that the amount of solid precipitation is characteristically low, and the zero-catch frequency of the nonshielded gauges is considerably high, 60{\%}?80{\%} of precipitation occurrences. The zero catch in high-latitude high-wind regions becomes a significant fraction of the total precipitation. At low wind speeds, the catch characteristics of the gauges are roughly similar to the DFIR, although it is noteworthy that the daily catch ratios decreased more rapidly with increasing wind speed compared to the WMO correction equations. The dependency of the daily catch ratios on air temperature was confirmed, and the rapid decrease in the daily catch ratios is due to small snow particles caused by the cold climate. The daily catch ratio of the Wyoming gauge clearly shows wind-induced losses. In addition, the daily catch ratios are considerably scattered under strong wind conditions due to the influence of blowing snow. This result suggests that it is not appropriate to extrapolate the WMO correction equations for the shielded gauges in high-latitude regions for high wind speed of over 6 m s?1.},
annote = {doi: 10.1175/JHM542.1},
author = {Sugiura, Konosuke and Ohata, Tetsuo and Yang, Daqing},
doi = {10.1175/JHM542.1},
issn = {1525-755X},
journal = {Journal of Hydrometeorology},
month = {oct},
number = {5},
pages = {984--994},
publisher = {American Meteorological Society},
title = {{Catch Characteristics of Precipitation Gauges in High-Latitude Regions with High Winds}},
url = {http://dx.doi.org/10.1175/JHM542.1},
volume = {7},
year = {2006}
}
@article{Sugiura2006b,
abstract = {Abstract Intercomparison of solid precipitation measurement at Barrow, Alaska, has been carried out to examine the catch characteristics of various precipitation gauges in high-latitude regions with high winds and to evaluate the applicability of the WMO precipitation correction procedures. Five manual precipitation gauges (Canadian Nipher, Hellmann, Russian Tretyakov, U.S. 8-in., and Wyoming gauges) and a double fence intercomparison reference (DFIR) as an international reference standard have been installed. The data collected in the last three winters indicates that the amount of solid precipitation is characteristically low, and the zero-catch frequency of the nonshielded gauges is considerably high, 60{\%}?80{\%} of precipitation occurrences. The zero catch in high-latitude high-wind regions becomes a significant fraction of the total precipitation. At low wind speeds, the catch characteristics of the gauges are roughly similar to the DFIR, although it is noteworthy that the daily catch ratios decreased more rapidly with increasing wind speed compared to the WMO correction equations. The dependency of the daily catch ratios on air temperature was confirmed, and the rapid decrease in the daily catch ratios is due to small snow particles caused by the cold climate. The daily catch ratio of the Wyoming gauge clearly shows wind-induced losses. In addition, the daily catch ratios are considerably scattered under strong wind conditions due to the influence of blowing snow. This result suggests that it is not appropriate to extrapolate the WMO correction equations for the shielded gauges in high-latitude regions for high wind speed of over 6 m s?1.},
annote = {doi: 10.1175/JHM542.1},
author = {Sugiura, Konosuke and Ohata, Tetsuo and Yang, Daqing},
doi = {10.1175/JHM542.1},
issn = {1525-755X},
journal = {Journal of Hydrometeorology},
month = {oct},
number = {5},
pages = {984--994},
publisher = {American Meteorological Society},
title = {{Catch Characteristics of Precipitation Gauges in High-Latitude Regions with High Winds}},
url = {http://dx.doi.org/10.1175/JHM542.1},
volume = {7},
year = {2006}
}
@article{Sugiura2006c,
abstract = {Abstract Intercomparison of solid precipitation measurement at Barrow, Alaska, has been carried out to examine the catch characteristics of various precipitation gauges in high-latitude regions with high winds and to evaluate the applicability of the WMO precipitation correction procedures. Five manual precipitation gauges (Canadian Nipher, Hellmann, Russian Tretyakov, U.S. 8-in., and Wyoming gauges) and a double fence intercomparison reference (DFIR) as an international reference standard have been installed. The data collected in the last three winters indicates that the amount of solid precipitation is characteristically low, and the zero-catch frequency of the nonshielded gauges is considerably high, 60{\%}?80{\%} of precipitation occurrences. The zero catch in high-latitude high-wind regions becomes a significant fraction of the total precipitation. At low wind speeds, the catch characteristics of the gauges are roughly similar to the DFIR, although it is noteworthy that the daily catch ratios decreased more rapidly with increasing wind speed compared to the WMO correction equations. The dependency of the daily catch ratios on air temperature was confirmed, and the rapid decrease in the daily catch ratios is due to small snow particles caused by the cold climate. The daily catch ratio of the Wyoming gauge clearly shows wind-induced losses. In addition, the daily catch ratios are considerably scattered under strong wind conditions due to the influence of blowing snow. This result suggests that it is not appropriate to extrapolate the WMO correction equations for the shielded gauges in high-latitude regions for high wind speed of over 6 m s?1.},
annote = {doi: 10.1175/JHM542.1},
author = {Sugiura, Konosuke and Ohata, Tetsuo and Yang, Daqing},
doi = {10.1175/JHM542.1},
issn = {1525-755X},
journal = {Journal of Hydrometeorology},
month = {oct},
number = {5},
pages = {984--994},
publisher = {American Meteorological Society},
title = {{Catch Characteristics of Precipitation Gauges in High-Latitude Regions with High Winds}},
url = {http://dx.doi.org/10.1175/JHM542.1},
volume = {7},
year = {2006}
}
@techreport{Jr.2015,
author = {Jr., John F. England and Cohn, Timothy A. and Faber, Beth A. and Stedinger, Jery R. and Jr., Wilbert O. Thomas and G., Andrea Veilleux and Kiang, Julie E. and Mason, Robert R.},
title = {{Guidelines for Determining Flood Flow Frequency}},
year = {2015}
}
@techreport{Glad2014a,
address = {Oslo},
annote = {regression with annual precipitation and effective lake percentage (expotential)},
author = {Glad, Per Alve and Reitan, Trond and Stenius, Seija},
institution = {Norwegian Water Resources and Energy Directorate},
keywords = {NVEreportGlad},
title = {{Regionalt formelverk for flomberegning i sm{\aa} nedb{\o}rfelt}},
url = {http://publikasjoner.nve.no/rapport/2014/rapport2014{\_}62.pdf},
year = {2014}
}
@article{Uhlenbrook1999,
abstract = {Abstract The uncertainties arising from the problem of identifying a representative model structure and model parameters in a conceptual rainfall-runoff model were investigated. A conceptual model, the HBV model, was applied to the mountainous Brugga basin (39.9 km{\^{a}}€�) in the Black Forest, southwestern Germany. In a first step, a Monte Carlo procedure with randomly generated parameter sets was used for calibration. For a ten-year calibration period, different parameter sets resulted in an equally good correspondence between observed and simulated runoff. A few parameters were well defined (i.e. best parameter values were within small ranges), but for most parameters good simulations were found with values varying over wide ranges. In a second step, model variants with different numbers of elevation and landuse zones and various runoff generation conceptualizations were tested. In some cases, representation of more spatial variability gave better simulations in terms of discharge. However, good results could be obtained with different and even unrealistic concepts. The computation of design floods and low flow predictions illustrated that the parameter uncertainty and the uncertainty of identifying a unique best model variant have implications for model predictions. The flow predictions varied considerably. The peak discharge of a flood with a probability of 0.01 year{\^{a}}ˆ'1, for instance, varied from 40 to almost 60 mm day{\^{a}}ˆ'1. It was concluded that model predictions, particularly in applied studies, should be given as ranges rather than as single values.},
annote = {HBV model parameter; plausibility of the model structure and process conceptualizations.},
author = {Uhlenbrook, Stefan and Seibert, Jan and Leibundgut, Christian and Rodhe, Allan},
doi = {10.1080/02626669909492273},
journal = {Hydrological Sciences Journal},
number = {5},
pages = {779--797},
title = {{Prediction uncertainty of conceptual rainfall-runoff models caused by problems in identifying model parameters and structure}},
url = {http://www.tandfonline.com/doi/abs/10.1080/02626669909492273{\#}.VOMbVPnF{\_}gA},
volume = {44},
year = {1999}
}
@article{EIHaiEITahir2012,
author = {{EI Hai EI Tahir}, M and Wang, Wenzhong and Xu, C.-Y. and Zhang, Youjing and Singh, V},
doi = {10.1061/(ASCE)HE.1943-5584.0000429},
journal = {Journal of Hydrologic Engineering},
number = {4},
pages = {578--589},
title = {{Comparison of Methods for Estimation of Regional Actual Evapotranspiration in Data Scarce Regions: Blue Nile Region, Eastern Sudan}},
url = {http://dx.doi.org/10.1061/(ASCE)HE.1943-5584.0000429},
volume = {17},
year = {2012}
}
@article{OCallaghan1984,
abstract = {The extraction of drainage networks from digital elevation data is important for quantitative studies in geomorphology and hydrology. A method is presented for extracting drainage networks from gridded elevation data. The method handles artificial pits introduced by data collection systems and extracts only the major drainage paths. Its performance appears to be consistent with the visual interpretation of drainage patterns from elevation contours. },
author = {O'Callaghan, John F and Mark, David M},
doi = {10.1016/S0734-189X(84)80011-0},
issn = {0734-189X},
journal = {Computer Vision, Graphics, and Image Processing},
number = {3},
pages = {323--344},
title = {{The extraction of drainage networks from digital elevation data}},
url = {http://www.sciencedirect.com/science/article/pii/S0734189X84800110},
volume = {28},
year = {1984}
}
@article{Petersen-Overleir2009,
annote = {discharge data quality control},
author = {Petersen-{\O}verleir, Asgeir and Soot, Andr{\'{e}} and Reitan, Trond},
doi = {10.1007/s11269-008-9354-5},
issn = {0920-4741},
journal = {Water Resources Management},
keywords = {Gauging station; Discharge measurement; Rating cur},
number = {9},
pages = {1835--1842},
publisher = {Springer Netherlands},
title = {{Bayesian Rating Curve Inference as a Streamflow Data Quality Assessment Tool}},
url = {http://dx.doi.org/10.1007/s11269-008-9354-5},
volume = {23},
year = {2009}
}
@article{Xu2005,
annote = {the methods for ungauged catchment and changing climate; non-stationary; good},
author = {Xu, C.-Y. and Wid{\'{e}}n, Elin and Halldin, Sven},
doi = {10.1007/BF02918679},
issn = {0256-1530},
journal = {Advances in Atmospheric Sciences},
keywords = {climate change; water-resources assessment; water},
number = {6},
pages = {789--797},
publisher = {Science Press},
title = {{Modelling hydrological consequences of climate change {\{}$\backslash$textemdash{\}} Progress and challenges}},
url = {http://dx.doi.org/10.1007/BF02918679},
volume = {22},
year = {2005}
}
@article{Soni2015,
abstract = {Scarcity of freshwater is one of the most critical resource issue the world is facing today. Due to its finite nature, renewable freshwater reserves are under relentless pressure due to population growth, economic development and rapid industrialization. Assessment of Terrestrial Water Storage (TWS), as an unified measure of freshwater reserve, is vital to understand hydrologic and climatic processes controlling its availability. In this study, TWS variations from Gravity Recovery and Climate Experiment (GRACE) satellites are analyzed in conjuction with multi-platform hydrologic observations for the period of 2003–2012. Here, the primary objective is to quantify and attribute the observed short-term variability of TWS and groundwater storage in the largest river basins of India (Ganga, Godavari, Krishna and Mahanadi). Alongside commendable agreement between TWS variations obtained from GRACE and water balance computation, results highlight some of the important deficiencies between the two. While monthly changes in TWS are highly correlated with precipitation, monthly TWS anomalies reveal a 1–2 month lag in their concurrence. Analysis of groundwater storage estimates demonstrate significant decline in the Ganga basin (−1.28±0.20mm/month) but practically no change in the Mahanadi basin. On the contrary, groundwater storage in Godavari and Krishna basins reveal notable increase at the rate of 0.74±0.21mm/month and 0.97±0.21mm/month respectively. Subsequently, in order to assess the influence of quasi-periodic, planetary scale, variations in the Earth's climate system, groundwater storage anomalies are evaluated with reference to ENSO variability. Results manifest that in all the basins, with the exception of Ganga, groundwater storage is dominantly influenced by ENSO, with large decrease (increase) during El Ni{\~{n}}o (La Ni{\~{n}}a) events. In the Ganga basin, groundwater storage variations refer to possible amalgamation of human intervention and natural climate variability.},
annote = {GRACE usuage in Indian basins},
author = {Soni, Aarti and Syed, Tajdarul H.},
doi = {10.1016/j.gloplacha.2015.09.007},
file = {::},
issn = {09218181},
journal = {Global and Planetary Change},
keywords = {ENSO,GRACE,Indian River Basins,Remote Sensing,Spatial-Temporal Variability,Terrestrial Water Storage},
month = {sep},
title = {{Diagnosing Land Water Storage Variations in Major Indian River Basins using GRACE observations}},
url = {http://www.sciencedirect.com/science/article/pii/S0921818115300369},
year = {2015}
}
@incollection{Balk2006,
abstract = {Evaluating the total numbers of people at risk from infectious disease in the world requires not just tabular population data, but data that are spatially explicit and global in extent at a moderate resolution. This review describes the basic methods for constructing estimates of global population distribution with attention to recent advances in improving both spatial and temporal resolution. To evaluate the optimal resolution for the study of disease, the native resolution of the data inputs as well as that of the resulting outputs are discussed. Assumptions used to produce different population data sets are also described, with their implications for the study of infectious disease. Lastly, the application of these population data sets in studies to assess disease distribution and health impacts is reviewed. The data described in this review are distributed in the accompanying DVD. },
author = {Balk, D L and Deichmann, U and Yetman, G and Pozzi, F and Hay, S I and Nelson, A},
booktitle = {Global Mapping of Infectious Diseases: Methods, Examples and Emerging Applications},
doi = {10.1016/S0065-308X(05)62004-0},
editor = {{Simon I. Hay}, Alastair Graham and Rogers, David J},
issn = {0065-308X},
pages = {119--156},
publisher = {Academic Press},
series = {Advances in Parasitology},
title = {{Determining Global Population Distribution: Methods, Applications and Data}},
url = {http://www.sciencedirect.com/science/article/pii/S0065308X05620040},
volume = {62},
year = {2006}
}
@article{Piani2010,
abstract = {Summary A statistical bias correction methodology for global climate simulations is developed and applied to daily land precipitation and mean, minimum and maximum daily land temperatures. The bias correction is based on a fitted histogram equalization function. This function is defined daily, as opposed to earlier published versions in which they were derived yearly or seasonally at best, while conserving properties of robustness and eliminating unrealistic jumps at seasonal or monthly transitions. The methodology is tested using the newly available global dataset of observed hydrological forcing data of the last 50{\&}{\#}xa0;years from the {\{}EU{\}} project {\{}WATCH{\}} (WATer and global CHange) and an initial conditions ensemble of simulations performed with the {\{}ECHAM5{\}} global climate model for the same period. Bias corrections are derived from 1960 to 1969 observed and simulated data and then applied to 1990{\^{a}}€“1999 simulations. Results confirm the effectiveness of the methodology for all tested variables. Bias corrections are also derived using three other non-overlapping decades from 1970 to 1999 and all members of the {\{}ECHAM5{\}} initial conditions ensemble. A methodology is proposed to use the resulting {\^{a}}€{\oe}ensemble of bias corrections{\^{a}}€� to quantify the error in simulated scenario projections of components of the hydrological cycle. },
author = {Piani, C and Weedon, G P and Best, M and Gomes, S M and Viterbo, P and Hagemann, S and Haerter, J O},
doi = {10.1016/j.jhydrol.2010.10.024},
issn = {0022-1694},
journal = {Journal of Hydrology},
keywords = {Hydrological cycle},
number = {3-4},
pages = {199--215},
title = {{Statistical bias correction of global simulated daily precipitation and temperature for the application of hydrological models}},
url = {http://www.sciencedirect.com/science/article/pii/S0022169410006475},
volume = {395},
year = {2010}
}
@article{Praskievicz2009,
abstract = {Hydrological modelling is a valuable tool for researchers in geography and other disciplines for studying the processes governing impacts of climate change and urban development on water resources and for projecting potential ranges of impacts from scenarios of future change. Modelling is an inherently probabilistic exercise, with uncertainty amplified at each stage of the process, from scenario generation to issues of scale, to simulation of hydrological processes, to management impacts. At the basin scale, significant factors affecting hydrological impacts of climate change include latitude, topography, geology, and land use. Under scenarios of future climate change, many basins are likely to experience changes not only in their mean hydrology, but also in the frequency and magnitude of extreme hydrological events. Impacts of climate change on water quality are largely determined by hydrological changes and by the nature of pollutants as flushingor dilution-controlled. The most significant impact of urban development on water resources is an increase in overall surface runoff and the flashiness of the storm hydrograph. The increase in impervious surface area associated with urban development also contributes to degradation of water quality as a result of non-point source pollution. Modelling studies on the combined impacts of climate change and urban development have found that either change may be more significant, depending on scenario assumptions and basin characteristics, and that each type of change may amplify or ameliorate the effects of the other. Hydrological impacts of climate change and urban development are likely to significantly affect future water resource management.},
annote = {Different hydrological models vary in their parameters and assumptions and are suited to simulate runoff at certain spatial and temporal scales.},
author = {Praskievicz, Sarah and Chang, Heejun},
doi = {10.1177/0309133309348098},
journal = {Progress in Physical Geography},
number = {5},
pages = {650--671},
title = {{A review of hydrological modelling of basin-scale climate change and urban development impacts}},
url = {http://ppg.sagepub.com/content/33/5/650.abstract},
volume = {33},
year = {2009}
}
@article{yatagai2005utilization,
author = {Yatagai, Akiyo and Xie, Pingping and Kitoh, Akio},
journal = {Sola},
pages = {193--196},
publisher = {Meteorological Society of Japan},
title = {{Utilization of a new gauge-based daily precipitation dataset over monsoon Asia for validation of the daily precipitation climatology simulated by the MRI/JMA 20-km-mesh AGCM}},
volume = {1},
year = {2005}
}

@article{oerlemans2009retreating,
author = {Oerlemans, J and Giesen, R H and den Broeke, M R},
doi = {10.3189/002214309789470969},
journal = {Journal of Glaciology},
number = {192},
pages = {729--736},
publisher = {International Glaciological Society},
title = {{Retreating alpine glaciers: increased melt rates due to accumulation of dust (Vadret da Morteratsch, Switzerland)}},
url = {http://www.ingentaconnect.com/search/article?option1=tka{\&}value1=Retreating+alpine+glaciers{\%}3a+increased+melt+rates+due+to+accumulation{\&}pageSize=10{\&}index=1},
volume = {55},
year = {2009}
}
@article{Coron2012,
annote = {generalized split-sample test (GSST); transferibilty of model parameters are caused by change in precipitation than in temperature and potential evaporation; The comparison of results between GR4J, MORDOR6 and SIMHYD indicates that even though the intensity varies depending on the model's structure, the general behaviors are similar.},
author = {Coron, Laurent and Andr{\'{e}}assian, Vazken and Perrin, Charles and Lerat, Julien and Vaze, Jai and Bourqui, Marie and Hendrickx, Frederic},
doi = {10.1029/2011WR011721},
journal = {Water Resources Research},
number = {5},
pages = {W05552},
publisher = {Wiley Online Library},
title = {{Crash testing hydrological models in contrasted climate conditions: An experiment on 216 Australian catchments}},
url = {http://dx.doi.org/10.1029/2011WR011721},
volume = {48},
year = {2012}
}
@article{Hundecha2016,
abstract = {The effect of methods of statistical downscaling of daily precipitation on changes in extreme flow indices under a plausible future climate change scenario was investigated in 11 catchments selected from 9 countries in different parts of Europe. The catchments vary from 67 to 6171km2 in size and cover different climate zones. 15 regional climate model outputs and 8 different statistical downscaling methods, which are broadly categorized as change factor and bias correction based methods, were used for the comparative analyses. Different hydrological models were implemented in different catchments to simulate daily runoff. A set of flood indices were derived from daily flows and their changes have been evaluated by comparing their values derived from simulations corresponding to the current and future climate. Most of the implemented downscaling methods project an increase in the extreme flow indices in most of the catchments. The catchments where the extremes are expected to increase have a rainfall-dominated flood regime. In these catchments, the downscaling methods also project an increase in the extreme precipitation in the seasons when the extreme flows occur. In catchments where the flooding is mainly caused by spring/summer snowmelt, the downscaling methods project a decrease in the extreme flows in three of the four catchments considered. A major portion of the variability in the projected changes in the extreme flow indices is attributable to the variability of the climate model ensemble, although the statistical downscaling methods contribute 35–60{\%} of the total variance.},
author = {Hundecha, Yeshewatesfa and Sunyer, Maria A. and Lawrence, Deborah and Madsen, Henrik and Willems, Patrick and B{\"{u}}rger, Gerd and Kriau{\v{c}}iūnienė, Jurate and Loukas, Athanasios and Martinkova, Marta and Osuch, Marzena and Vasiliades, Lampros and von Christierson, Birgitte and Vormoor, Klaus and Y{\"{u}}cel, Ismail},
doi = {10.1016/j.jhydrol.2016.08.033},
issn = {00221694},
journal = {Journal of Hydrology},
keywords = {Climate change,Europe,Flooding,Regional climate models,Statistical downscaling},
month = {oct},
pages = {1273--1286},
title = {{Inter-comparison of statistical downscaling methods for projection of extreme flow indices across Europe}},
url = {http://www.sciencedirect.com/science/article/pii/S0022169416305236},
volume = {541},
year = {2016}
}
@article{Smith2004a,
abstract = {The distributed model intercomparison project (DMIP) was formulated as a broad comparison of many distributed models amongst themselves and to a lumped model used for operational river forecasting in the US. {\{}DMIP{\}} was intended to provide guidance on research and implementation directions for the {\{}US{\}} National Weather Service as well as to address unresolved questions on the variability of rainfall and its effect on basin response. Twelve groups participated, including groups from Canada, China, Denmark, New Zealand, and the US. Numerous data sets including seven years of concurrent radar-rainfall and streamflow data were provided to participants through web access. Detailed modeling instructions specified calibration and verification periods and modeling points. Participating models were run in {\^{a}}€˜simulation{\^{a}}€™ mode without a forecast component. {\{}DMIP{\}} proved to be a successful endeavour, providing the hydrologic research and forecasting communities with a wealth of results. This paper presents the background and motivations for {\{}DMIP{\}} and describes the major project elements.},
annote = {the review and the experiment design;},
author = {Smith, Michael B and Seo, Dong-Jun and Koren, Victor I and Reed, Seann M and Zhang, Ziya and Duan, Qingyun and Moreda, Fekadu and Cong, Shuzheng},
doi = {10.1016/j.jhydrol.2004.03.040},
issn = {0022-1694},
journal = {Journal of Hydrology},
keywords = {Hydrologic model},
number = {1-4},
pages = {4--26},
title = {{The distributed model intercomparison project (DMIP): motivation and experiment design}},
url = {http://www.sciencedirect.com/science/article/pii/S0022169404002379},
volume = {298},
year = {2004}
}
@article{Maussion2011,
author = {Maussion, F and Scherer, D and Finkelnburg, R and Richters, J and Yang, W and Yao, T},
doi = {10.5194/hess-15-1795-2011},
journal = {Hydrology and Earth System Sciences},
number = {6},
pages = {1795--1817},
title = {{WRF simulation of a precipitation event over the Tibetan Plateau, China – an assessment using remote sensing and ground observations}},
url = {http://www.hydrol-earth-syst-sci.net/15/1795/2011/},
volume = {15},
year = {2011}
}
@article{Vache2006,
author = {Vach{\'{e}}, Kellie B. and McDonnell, Jeffrey J.},
doi = {10.1029/2005WR004247},
issn = {00431397},
journal = {Water Resources Research},
month = {feb},
number = {2},
pages = {W02409},
title = {{A process-based rejectionist framework for evaluating catchment runoff model structure}},
url = {http://doi.wiley.com/10.1029/2005WR004247},
volume = {42},
year = {2006}
}
@article{Bastola2011,
abstract = {This study attempts to assess the uncertainty in the hydrological impacts of climate change using a multi-model approach combining multiple emission scenarios, GCMs and conceptual rainfall–runoff models to quantify uncertainty in future impacts at the catchment scale. The uncertainties associated with hydrological models have traditionally been given less attention in impact assessments until relatively recently. In order to examine the role of hydrological model uncertainty (parameter and structural uncertainty) in climate change impact studies a multi-model approach based on the Generalised Likelihood Uncertainty Estimation (GLUE) and Bayesian Model Averaging (BMA) methods is presented. Six sets of regionalised climate scenarios derived from three GCMs, two emission scenarios, and four conceptual hydrological models were used within the GLUE framework to define the uncertainty envelop for future estimates of stream flow, while the GLUE output is also post processed using BMA, where the probability density function from each model at any given time is modelled by a gamma distribution with heteroscedastic variance. The investigation on four Irish catchments shows that the role of hydrological model uncertainty is remarkably high and should therefore be routinely considered in impact studies. Although, the GLUE and BMA approaches used here differ fundamentally in their underlying philosophy and representation of error, both methods show comparable performance in terms of ensemble spread and predictive coverage. Moreover, the median prediction for future stream flow shows progressive increases of winter discharge and progressive decreases in summer discharge over the coming century.},
author = {Bastola, Satish and Murphy, Conor and Sweeney, John},
doi = {10.1016/j.advwatres.2011.01.008},
issn = {03091708},
journal = {Advances in Water Resources},
keywords = {BMA,Climate change,GLUE,Ireland,Rainfall–runoff model,Uncertainty},
number = {5},
pages = {562--576},
title = {{The role of hydrological modelling uncertainties in climate change impact assessments of Irish river catchments}},
url = {http://www.sciencedirect.com/science/article/pii/S0309170811000224},
volume = {34},
year = {2011}
}
@article{Krysanova1999,
annote = {distributed HBV by small subcatchments and elevation bands},
author = {Krysanova, V and Bronstert, A and M{\"{u}}ller-Wohlfeil, D.-I.},
doi = {10.1080/02626669909492224},
journal = {Hydrological Sciences Journal},
number = {2},
pages = {313--331},
title = {{Modelling river discharge for large drainage basins: from lumped to distributed approach}},
url = {http://www.tandfonline.com/doi/abs/10.1080/02626669909492224{\#}.VI7tyyvF{\_}gB},
volume = {44},
year = {1999}
}
@techreport{Lawrence2011,
author = {Lawrence, Deborah and Hisdal, Hege},
title = {{Hydrological projections for floods in Norway under a future climate}},
url = {http://webby.nve.no/publikasjoner/report/2011/report2011{\_}05.pdf},
year = {2011}
}
@article{Zhang2011,
abstract = {Summary In this paper, the trends of the annual streamflow and precipitation and cross correlations between them were analyzed in nine large river basins of China during 1956{\^{a}}€“2005. The results indicate that: (1) the annual mean streamflow decreases in arid and semi-arid regions of north China; however, increasing trends occur in south and Southwest China; (2) the annual streamflow and precipitation exhibit reasonable correlation in nine large river basins except those located in inland areas. The annual streamflow over most areas of China is fed by precipitation; however, the decline in streamflow is faster than the decreases of precipitation since 1970s in the arid and semi-arid regions of north China. The relationship between the annual precipitation and streamflow presents a non-stationary state in north China. This non-stationary relationship is strongly influenced by both human activities and precipitation changes; (3) a significant increase of water use might be the major factor responsible for the steeper decline in streamflow than in precipitation in Haihe River, Yellow River and Songliao River basins in north China. In inland river areas, increase of water use and actual evapotranspiration might result in decline in streamflow although precipitation has an increase tendency. This paper sheds light on the non-stationary relationship between annual precipitation and streamflow and possible underlying causes, which will be helpful for a better understanding of the changes of precipitation and streamflow in China at large scale and in other regions of the world.},
annote = {climate change and impact of human on streamflow for non-stationary relationship between precipitation and streamflow},
author = {Zhang, Zengxin and Chen, Xi and Xu, C.-Y. and Yuan, Lifeng and Yong, Bin and Yan, Shaofeng},
doi = {10.1016/j.jhydrol.2011.07.041},
issn = {0022-1694},
journal = {Journal of Hydrology},
keywords = {Streamflow},
number = {1-2},
pages = {81--93},
title = {{Evaluating the non-stationary relationship between precipitation and streamflow in nine major basins of China during the past 50 years}},
url = {http://www.sciencedirect.com/science/article/pii/S0022169411005075},
volume = {409},
year = {2011}
}
@article{Chaturvedi2012,
annote = {ensemble results of CMIP5 for India of temperature and precipitation},
author = {Chaturvedi, Rajiv Kumar and Joshi, Jaideep and Jayaraman, Mathangi and Bala, G and Ravindranath, N H},
journal = {Current Science},
number = {7},
pages = {791--802},
publisher = {INDIAN ACAD SCIENCES},
title = {{Multi-model climate change projections for India under representative concentration pathways}},
url = {http://wcrp-cordex.ipsl.jussieu.fr/images/pdf/peer{\_}rev{\_}pub/2012{\_}Chaturvedi.pdf},
volume = {103},
year = {2012}
}
@article{Crochemore2015,
abstract = {AbstractThis paper investigates the relationship between expert judgement and numerical criteria when evaluating hydrological model performance by comparing simulated and observed hydrographs. Using a web-based survey, we collected the visual evaluations of 150 experts on a set of high- and low-flow hydrographs. We then compared these answers with results from 60 numerical criteria. Agreement between experts was found to be more frequent in absolute terms (when rating models) than in relative terms (when comparing models), and better for high flows than for low flows. When comparing the set of 150 expert judgements with numerical criteria, we found that most expert judgements were loosely correlated with a numerical criterion, and that the criterion that best reflects expert judgement varies from expert to expert. Overall, we identified two groups of 10 criteria yielding an equivalent match with the expertise of the 150 participants in low and high flows, respectively. A single criterion common to both gr...},
author = {Crochemore, Louise and Perrin, Charles and Andr{\'{e}}assian, Vazken and Ehret, Uwe and Seibert, Simon P. and Grimaldi, Salvatore and Gupta, Hoshin and Paturel, Jean-Emmanuel},
doi = {10.1080/02626667.2014.903331},
issn = {0262-6667},
journal = {Hydrological Sciences Journal},
keywords = {crit{\`{e}}re num{\'{e}}rique,efficacit{\'{e}},efficiency,enqu{\^{e}}te en ligne,expert judgement,hydrograph evaluation,hydrological model,jugement expert,mod{\`{e}}le hydrologique,numerical criterion,online survey,{\'{e}}valuation d'hydrogrammes},
language = {en},
month = {feb},
number = {3},
pages = {402--423},
publisher = {Taylor {\&} Francis},
title = {{Comparing expert judgement and numerical criteria for hydrograph evaluation}},
url = {http://www.tandfonline.com/doi/abs/10.1080/02626667.2014.903331},
volume = {60},
year = {2015}
}
@article{Ruelland2012,
abstract = {Summary This paper assesses the future variability of water resources in the short, medium and long terms over a large Sudano-Sahelian catchment in West Africa. Flow simulations were performed with a daily conceptual model. A period of nearly 50{\&}{\#}xa0;years (1952-2000) was chosen to capture long-term hydro-climatic variability. Calibration and validation were performed on the basis of a multi-objective function that aggregates a variety of goodness-of-fit indices. The climate models HadCM3 and MPI-M under SRES-A2 were used to provide future climate scenarios over the catchment. Outputs from these models were used to generate daily rainfall and temperature series for the 21st century according to: (i) the unbias and delta methods application and (ii) spatial and temporal downscaling. A temperature-based formula was used to calculate present and future potential evapotranspiration (PET). The daily rainfall and {\{}PET{\}} series were introduced into the calibrated and validated hydrological model to simulate future discharge. The model correctly reproduces the observed discharge at the basin outlet. The Nash-Sutcliffe efficiency criterion is over 89{\%} for both calibration and validation periods, and the volume error between simulation and observation is close to null for the overall considered period. With regard to future climate, the results show clear trends of reduced rainfall over the catchment. This rainfall deficit, together with a continuing increase in potential evapotranspiration, suggests that runoff from the basin could be substantially reduced, especially in the long term (60{\^{a}}€“65{\%}), compared to the 1961{\^{a}}€“1990 reference period. As a result, the long-term hydrological simulations show that the catchment discharge could decrease to the same levels as those observed during the severe drought of the 1980s. },
annote = {concept model with GCMs downscaling methods. limitations. the reason for differences in model predicted runoff may be due to the different variables combination. the parameter is get from the datasets, but nonlinear system; variance increasing; precipitation and discharge falling},
author = {Ruelland, D and Ardoin-Bardin, S and Collet, L and Roucou, P},
doi = {10.1016/j.jhydrol.2012.01.002},
issn = {0022-1694},
journal = {Journal of Hydrology},
keywords = {Hydro-climatic variability},
pages = {207--216},
title = {{Simulating future trends in hydrological regime of a large Sudano-Sahelian catchment under climate change}},
url = {http://www.sciencedirect.com/science/article/pii/S0022169412000054},
volume = {424-425},
year = {2012}
}
@article{GRL:GRL18494,
abstract = {For each of ten glaciers in Norway and two in Sweden, vertical profiles of net balance bn(z), which are typically published as values at about a dozen altitudes, are strongly linear and nearly parallel from year to year. Separate linear functions fit the bn(z) from year to year with r2 ≥ 0.89 over the 12 glaciers. A family of parallel lines for each glacier that differ from year to year only by an amount $\Delta$bn constant with altitude has r2 ≥ 0.85. There is an altitude z′ on each glacier where the measured balance bn(z′) correlates well with the glacier-total bn with r ≥ 0.97 over the 12 glaciers. A remarkable consequence of this and of the high correlation of bn between many of the glaciers in the region is that measurements on one glacier (1775 meters on Hardangerj{\o}kulen) provide a good estimate of bn at several other glaciers.},
annote = {L13401},
author = {Rasmussen, L A},
doi = {10.1029/2004GL020273},
issn = {1944-8007},
journal = {Geophysical Research Letters},
keywords = {Glaciology,Information Related to Geographic Region: Europe,Snow and ice},
number = {13},
pages = {n/a----n/a},
title = {{Altitude variation of glacier mass balance in Scandinavia}},
url = {http://dx.doi.org/10.1029/2004GL020273},
volume = {31},
year = {2004}
}
@article{Akhtar2008148,
abstract = {Summary This paper presents estimates of water resources changes in three river basins in the Hindukush-Karakorum-Himalaya (HKH) region associated with climate change. The present climate (1961-1990) and future climate {\{}SRES{\}} {\{}A2{\}} scenario (2071-2100) are simulated by the {\{}PRECIS{\}} Regional Climate Model at a spatial resolution Two {\{}HBV{\}} models (i.e. HBV-Met and HBV-PRECIS) are designed to quantify the future discharge. HBV-Met is calibrated and validated with inputs from observed meteorological data while HBV-PRECIS is calibrated and validated with inputs from {\{}PRECIS{\}} {\{}RCM{\}} simulations for the current climate. The future precipitation and temperature series are constructed through the delta change approach in HBV-Met, while in HBV-PRECIS future precipitation and temperature series from {\{}PRECIS{\}} {\{}RCM{\}} are directly used. The future discharge is simulated for three stages of glacier coverage: 100{\%} glaciers, 50{\%} glaciers and 0{\%} glaciers. Generally temperature and precipitation shows an increase towards the end of 21st century. The efficiencies of HBV-Met during calibration and validation are higher compared to the HBV-PRECIS efficiencies. In a changed climate, discharge will generally increase in both models for 100{\%} and 50{\%} glacier scenarios. For the 0{\%} glacier scenario, HBV-Met predicts a drastic decrease in water resources (up to 94{\%}) in contrast to HBV-PRECIS which shows only a decrease up to 15{\%}. Huge outliers in annual maximum discharge simulated through HBV-Met indicate that hydrological conditions are not predicted perfectly through the delta change downscaling approach. The results for HBV-Met simply confirm that the quality of observed data in this region is poor. The HBV-PRECIS model results are indicative of the higher risk of flood problems under climate change. The climate change signals in all three river basins are similar however, there are differences in the evaluated future water resources estimated through HBV-Met, whereas in HBV-PRECIS the changes in water resources are similar. This shows that the transfer of climate change signals into hydrological changes is more consistent in HBV-PRECIS than in HBV-Met. One of the reasons of the poorer results of the delta change approach is that in this approach the frequency of rainy days is not changed and day to day variability in temperature is not correctly transferred. However more research is needed to evaluate the uncertainties in both downscaling approaches. Moreover, the dynamical downscaling approach needs to be tested with other {\{}RCMs{\}} and preferably to other river basins as well.},
author = {Akhtar, M and Ahmad, N and Booij, M J},
doi = {10.1016/j.jhydrol.2008.03.015},
issn = {0022-1694},
journal = {Journal of Hydrology},
keywords = {Regional climate model},
number = {1-4},
pages = {148--163},
title = {{The impact of climate change on the water resources of Hindukush-Karakorum-Himalaya region under different glacier coverage scenarios}},
url = {http://www.sciencedirect.com/science/article/pii/S0022169408001480},
volume = {355},
year = {2008}
}
@article{HYP:HYP79,
author = {Munro, D Scott},
doi = {10.1002/1099-1085(20000630)14:9<1627::AID-HYP79>3.0.CO;2-6},
issn = {1099-1085},
journal = {Hydrological Processes},
keywords = {glacier hydrology,mass balance,meltwater production,snow accumulation},
number = {9},
pages = {1627--1640},
publisher = {John Wiley {\&} Sons, Ltd.},
title = {{Progress in glacier hydrology: a Canadian perspective}},
url = {http://dx.doi.org/10.1002/1099-1085(20000630)14:9{\textless}1627::AID-HYP79{\textgreater}3.0.CO;2-6},
volume = {14},
year = {2000}
}
@article{Zhang2014,
abstract = {Abstract The period of direct groundwater storage measurements is often too short to allow reliable inferences of groundwater storage trends at catchment scales. However, as groundwater storage sustains low flows in catchments during dry periods, groundwater storage can also be estimated indirectly from daily streamflow based on hydraulic groundwater theory; this idea was applied herein to 17 selected Australian catchments to examine their long-term (half a century or longer) groundwater storage trends. On average, over past 45 years, groundwater storage exhibited negative trends in all the selected catchments, except in the Katherine River catchment located in the Northern Territory. These negative trends persisted over longer periods, close to 100{\&}{\#}xa0;years in some catchments and the strongest decreasing trend of 0.241 mm per year was observed in the Barron River catchment in New South Wales. However, groundwater storage exhibited different trends over the different shorter periods. Thus, while during the period of 1997-2007, 15 out of the 17 catchments showed negative trends in groundwater storage, during the period of 1980{\^{a}}€“2000, 12 out of the 17 catchments exhibited positive trends in groundwater storage; this underscores the fact that record lengths of one or even two decades are inadequate to derive meaningful trends. Strong consistencies in the trends exist across most catchments, indicating that groundwater storage is affected by large-scale climate factors.},
author = {Zhang, Lu and Brutsaert, Wilfried and Crosbie, Russell and Potter, Nick},
doi = {10.1016/j.advwatres.2014.09.001},
issn = {0309-1708},
journal = {Advances in Water Resources},
keywords = {Base flow},
pages = {156--165},
title = {{Long-term annual groundwater storage trends in Australian catchments}},
url = {http://www.sciencedirect.com/science/article/pii/S0309170814001845},
volume = {74},
year = {2014}
}
@misc{CORDEX2015,
author = {CORDEX, WCRP},
howpublished = {Website},
month = {feb},
title = {{Peer reviewed publications}},
url = {http://wcrp-cordex.ipsl.jussieu.fr/index.php/cordex-peer-review-publications},
year = {2015}
}
@article{Ragettli2015,
abstract = {The hydrology of high-elevation watersheds of the Hindu Kush-Himalaya region (HKH) is poorly known. The correct representation of internal states and process dynamics in glacio-hydrological models can often not be verified due to missing in situ measurements. We use a new set of detailed ground data from the upper Langtang valley in Nepal to systematically guide a state-of-the art glacio-hydrological model through a parameter assigning process with the aim to understand the hydrology of the catchment and contribution of snow and ice processes to runoff. 14 parameters are directly calculated on the basis of local data, and 13 parameters are calibrated against 5 different datasets of in situ or remote sensing data. Spatial fields of debris thickness are reconstructed through a novel approach that employs data from an Unmanned Aerial Vehicle (UAV), energy balance modeling and statistical techniques. The model is validated against measured catchment runoff (Nash-Sutcliffe efficiency 0.87) and modeled snow cover is compared to Landsat snow cover. The advanced representation of processes allowed assessing the role played by avalanching for runoff for the first time for a Himalayan catchment (5{\%} of annual water inputs to the hydrological system are due to snow redistribution) and to quantify the hydrological significance of sub-debris ice melt (9{\%} of annual water inputs). Snowmelt is the most important contributor to total runoff during the hydrological year 2012/2013 (representing 40{\%} of all sources), followed by rainfall (34{\%}) and ice melt (26{\%}). A sensitivity analysis is used to assess the efficiency of the monitoring network and identify the timing and location of field measurements that constrain model uncertainty. The methodology to set up a glacio-hydrological model in high-elevation regions presented in this study can be regarded as a benchmark for modelers in the HKH seeking to evaluate their calibration approach, their experimental setup and thus to reduce the predictive model uncertainty.},
author = {Ragettli, S. and Pellicciotti, F. and Immerzeel, W. W. and Miles, E. S. and Petersen, L. and Heynen, M. and Shea, J. M. and Stumm, D. and Joshi, S. and Shrestha, A.},
journal = {Advances in Water Resources},
keywords = {Debris covered glaciers,Glacier mass balance,Himalayas,In situ measurements,Mountain hydrology,Runoff modeling},
pages = {94--111},
publisher = {Elsevier Ltd},
title = {{Unraveling the hydrology of a Himalayan catchment through integration of high resolution in situ data and remote sensing with an advanced simulation model}},
volume = {78},
year = {2015}
}
@article{Merz2011,
annote = {HBV model parameter change with five years and intercorrelation; for non-stationart study},
author = {Merz, Ralf and Parajka, Juraj and Bl{\"{o}}schl, G{\"{u}}nter},
doi = {10.1029/2010WR009505},
issn = {1944-7973},
journal = {Water Resources Research},
keywords = {climate impact,hydrological model,parameter estimation},
number = {2},
pages = {W02531},
title = {{Time stability of catchment model parameters: Implications for climate impact analyses}},
url = {http://dx.doi.org/10.1029/2010WR009505},
volume = {47},
year = {2011}
}
@article{wallinga1998sensitivity,
author = {Wallinga, Jakob and van de Wal, Roderik S W},
journal = {Journal of Glaciology},
number = {147},
pages = {383--393},
publisher = {International Glaciological Society},
title = {{Sensitivity of Rhonegletscher, Switzerland, to climate change: experiments with a one-dimensional flowline model}},
url = {http://www.igsoc.org/journal.old/44/147/igs{\_}journal{\_}vol44{\_}issue147{\_}pg383-393.pdf},
volume = {44},
year = {1998}
}
@article{Brigode2013,
abstract = {Summary This paper investigates the uncertainty of hydrological predictions due to rainfall-runoff model parameters in the context of climate change impact studies. Two sources of uncertainty were considered: (i) the dependence of the optimal parameter set on the climate characteristics of the calibration period and (ii) the use of several posterior parameter sets over a given calibration period. The first source of uncertainty often refers to the lack of model robustness, while the second one refers to parameter uncertainty estimation based on Bayesian inference. Two rainfall-runoff models were tested on 89 catchments in northern and central France. The two sources of uncertainty were assessed in the past observed period and in future climate conditions. The results show that, given the evaluation approach followed here, the lack of robustness was the major source of variability in streamflow projections in future climate conditions for the two models tested. The hydrological projections generated by an ensemble of posterior parameter sets are close to those associated with the optimal set. Therefore, it seems that greater effort should be invested in improving the robustness of models for climate change impact studies, especially by developing more suitable model structures and proposing calibration procedures that increase their robustness.},
annote = {the dependence of the model parameters on the characteristics of the record period used for calibration; hydrological model parameters uncertainity in climate change study},
author = {Brigode, Pierre and Oudin, Ludovic and Perrin, Charles},
doi = {10.1016/j.jhydrol.2012.11.012},
issn = {0022-1694},
journal = {Journal of Hydrology},
keywords = {Climate change},
pages = {410--425},
title = {{Hydrological model parameter instability: A source of additional uncertainty in estimating the hydrological impacts of climate change?}},
url = {http://www.sciencedirect.com/science/article/pii/S002216941200964X},
volume = {476},
year = {2013}
}
@article{Perrin2003,
annote = {to develope simple models},
author = {Perrin, Charles and Michel, Claude and Andr{\'{e}}assian, Vazken},
doi = {10.1016/S0022-1694(03)00225-7},
issn = {0022-1694},
journal = {Journal of Hydrology},
keywords = {Rainfall-runoff modelling},
number = {1-4},
pages = {275--289},
title = {{Improvement of a parsimonious model for streamflow simulation}},
url = {http://www.sciencedirect.com/science/article/pii/S0022169403002257},
volume = {279},
year = {2003}
}
@article{Huss2014,
author = {Huss, Matthias and Zemp, Michael and Joerg, Philip C and Salzmann, Nadine},
doi = {10.1016/j.jhydrol.2013.12.017},
journal = {Journal of Hydrology},
pages = {35--48},
publisher = {Elsevier},
title = {{High uncertainty in 21{\{}$\backslash$textsuperscript{\{}st{\}}{\}}st century runoff projections from glacierized basins}},
url = {http://www.sciencedirect.com/science/article/pii/S0022169413009141{\#}b0120},
volume = {510},
year = {2014}
}
@article{ASL:ASL232,
abstract = {A high resolution daily gridded temperature data set for the Indian region was developed using temperature data of 395 quality controlled stations for the period 1969–2005. A modified version of the Shepard's angular distance weighting algorithm was used for interpolating the station temperature data into 1° latitude × 1° longitude grids. Using the cross validation, errors were estimated and found less than 0.5 °C. The data set was also compared with another high resolution data set and found comparable. Mean frequency of cold and heat waves, temperature anomalies associated with the monsoon breaks have been presented. Copyright {\textcopyright} 2009 Royal Meteorological Society},
author = {Srivastava, A K and Rajeevan, M and Kshirsagar, S R},
doi = {10.1002/asl.232},
issn = {1530-261X},
journal = {Atmospheric Science Letters},
keywords = {Correlation Length Scale (CLS),Gridded temperature data,angular distance,heat and cold wave frequency},
number = {4},
pages = {249--254},
publisher = {John Wiley {\&} Sons, Ltd.},
title = {{Development of a high resolution daily gridded temperature data set (1969–2005) for the Indian region}},
url = {http://dx.doi.org/10.1002/asl.232},
volume = {10},
year = {2009}
}
@article{Hubbard1998,
author = {Hubbard, Alun and Blatter, Heinz and Nienow, Peter and Mair, Douglas and Hubbard, Bryn},
journal = {Journal of Glaciology},
number = {147},
pages = {368--378},
publisher = {International Glaciological Society},
title = {{Comparison of a three-dimensional model for glacier flow with field data from Haut Glacier d'Arolla, Switzerland}},
url = {http://www.igsoc.org:8080/journal/44/147/igs{\_}journal{\_}vol44{\_}issue147{\_}pg368-378.pdf},
volume = {44},
year = {1998}
}
@article{Singh1997183,
abstract = {The present study deals with precipitation distribution with altitude for the Satluj and Beas basins in the western Himalayas. Rainfall increases linearly with elevation for both basins in the outer Himalayan range. The middle Himalayan range of the Beas basin has exceptionally heavy rainfall on the windward side and much less rain (less than half) on the leeward side. Rainfall gradients are 106 mm per 100 m to windward and 13 mm per 100 m to leeward of this range. Different trends of rainfall variation with elevation are observed in different seasons in the middle Himalayan range with a linear increase in annual rainfall. Rainfall follows an exponential decreasing trend with altitude in the greater Himalayan range. Average annual rainfall decreases from the outer Himalayas to the greater Himalayas in the Satluj basin. In the greater Himalayas, it is about one-sixth of outer Himalayas rainfall. Maximum rainfall is in the middle Himalayan range in the Beas basin. Monsoon rainfall contributes the largest part of the annual rainfall for all the Himalayan ranges. Spatial correlation is higher in the outer Himalayas range than in the other ranges. Snowfall increases linearly with elevation in the greater Himalayas. Snowfall gradients for the Spiti and Baspa sub-basins are 43 mm per 100 m and 10 mm per 100 m, respectively. The ratio of snowfall to annual precipitation varies linearly with altitude. All stations recorded more than 60{\%} snow contribution to annual precipitation. Extrapolation of the relationship indicates that snow and rain contribute equally at about 2000 m, and all the precipitation occurs as snow above 5000 m.},
author = {Singh, Pratap and Kumar, Naresh},
doi = {10.1016/S0022-1694(96)03222-2},
issn = {0022-1694},
journal = {Journal of Hydrology},
number = {1-2},
pages = {183--206},
title = {{Effect of orography on precipitation in the western Himalayan region}},
url = {http://www.sciencedirect.com/science/article/pii/S0022169496032222},
volume = {199},
year = {1997}
}
@article{Pike1964,
abstract = {A modified form of Turc's evapo-transpiration formula is proposed and used to predict annual run-off from large catchments in Malawi. Arising out of this investigation the validity of Penman's conversion factor f as a seasonal factor for large catchments in a tropical climate with a seasonally unbalanced water regime is confirmed.},
author = {Pike, J G},
doi = {http://dx.doi.org/10.1016/0022-1694(64)90022-8},
issn = {0022-1694},
journal = {Journal of Hydrology},
number = {2},
pages = {116--123},
title = {{The estimation of annual run-off from meteorological data in a tropical climate}},
url = {http://www.sciencedirect.com/science/article/pii/0022169464900228},
volume = {2},
year = {1964}
}
@article{Freeze1969,
abstract = {In recent years hydrologists have subjected the various subsystems of the hydrologic cycle to intensive study, designed to discover the mechanisms of flow and to arrive at physical and mathematical descriptions of the flow processes. As a consequence, meaningful results are now available in the form of numerical solutions to mathematical boundary value problems for groundwater flow, unsaturated porous media flow, overland flow, and channel flow. These developments in physical hydrology, together with the tremendous advance in digital computer technology, should provide the impetus for a necessary redirection of research in hydrologic simulation. In this paper, a blueprint for the development of physically-based hydrologic response models is presented; the level of sophistication that can be achieved with presently available methodology is discussed; and areas for necessary future research are pinpointed.},
annote = {framework of physically based model especially for channel routing and soil moisture preocess},
author = {Freeze, R.Allan and Harlan, R L},
doi = {10.1016/0022-1694(69)90020-1},
issn = {0022-1694},
journal = {Journal of Hydrology},
number = {3},
pages = {237--258},
title = {{Blueprint for a physically-based, digitally-simulated hydrologic response model}},
url = {http://www.sciencedirect.com/science/article/pii/0022169469900201},
volume = {9},
year = {1969}
}
@article{Atkinson2003,
abstract = {We present a systematic approach to the development of models for making hourly flow predictions, where each step provides insight into the relative importance of catchment and climatic properties (rainfall, soil properties, vegetation, topography), their spatial variability, and their influence on temporal flow variability at the outlet. Our modelling approach uses a simple conceptual model design requiring minimal calibration and physically meaningful input parameters estimated a priori from landscape data or from analyses of streamflow recession curves. The model structure allows direct measurement of parameter uncertainty and the ability to investigate its propagation through the model to produce bounds of predictive uncertainty via the Monte Carlo method. This method was applied to a number of model designs to assess the tradeoff between model complexity, accuracy and predictive uncertainty, and to identify the most appropriate model design under specific climatic conditions. With the preferred model, sensitivity analysis was used to identify the dominant controls on streamflow variability at the hourly timescale. In summary the aim is not to present a distributed model of universal applicability, but to generate insights into the climate, soil and vegetation controls on streamflow variability at the hourly timescale, and on predictive accuracy and uncertainty, that can be used in future modelling efforts.},
author = {Atkinson, S E and Sivapalan, M and Woods, R A and Viney, N R},
doi = {10.1016/S0309-1708(02)00183-5},
issn = {0309-1708},
journal = {Advances in Water Resources},
keywords = {Timescales},
number = {3},
pages = {219--235},
title = {{Dominant physical controls on hourly flow predictions and the role of spatial variability: Mahurangi catchment, New Zealand}},
url = {http://www.sciencedirect.com/science/article/pii/S0309170802001835},
volume = {26},
year = {2003}
}
@article{Hagg2004,
abstract = {A photogrammetric survey in 1998 formed the basis for compiling a map of the Tuyuksu glacier region in the northern Tien Shan, Central Asia. Comparison with a map from 1958 enables calculation of the change in glacier volume over 40 years. The results are compared with direct annual measurements carried out continuously since 1956. Central Tuyuksu glacier shows a mass balance of {\&}{\#}8722;12.6 m w.e. for the geodetic method and {\&}{\#}8722;16.8 m for glaciological measurements. In view of the high accuracy of the maps, the discrepancy can be explained mainly by deficiencies in the glaciological measurements. Application of the precipitation{\&}{\#}8211;runoff model HBV-ETH represents the hydrological method of mass-balance determination and delivers specific mass-balance losses almost twice those indicated by the geodetic observations. This discrepancy is suspected to be caused by erroneous runoff measurements. The volume balance derived by the geodetic method is used to calibrate both the glaciological and the hydrological method.},
author = {Hagg, Wilfried J and Braun, Ludwig N and Uvarov, Vladimir N and Makarevich, Konstantin G},
doi = {10.3189/172756504781829783},
journal = {Journal of Glaciology},
number = {171},
pages = {505--510},
title = {{A comparison of three methods of mass-balance determination in the Tuyuksu glacier region, Tien Shan, Central Asia}},
url = {http://www.ingentaconnect.com/content/igsoc/jog/2004/00000050/00000171/art00004},
volume = {50},
year = {2004}
}
@article{Murphy2014,
abstract = {Summary Several studies drawing upon general circulation models have investigated the potential impacts of future climate change on precipitation and runoff to stream flow in the southwest United States, suggesting reduced runoff in response to increasing temperatures and less precipitation. With the hydroclimatic changes considered to be underway, water management professionals have been counseled to abandon historical assumptions of stationarity in the natural systems governing surface water replenishments. Stationarity is predicated upon an assumption that the generating process is in equilibrium around an underlying mean and that variance remains constant over time. The implications of a more arid future are significant for surface water resources in the semi-arid Colorado River Basin (CRB). To examine the evidence of forthcoming change, eight sub-basins were identified for this study having unregulated runoff to stream flow gages, providing a 22{\%} spatial sampling of the CRB. Their long-term record of surface temperature and precipitation along with corresponding gage records were evaluated with time series analysis methods and testing criteria established per statistical definitions of stationarity. Statistically significant temperature increases in all sub-basins were found, with persistently non-stationary time series in the recent record relative to the earlier historical record. However, tests of precipitation and runoff did not reveal persistent reductions, indicating that they remain stationary processes. Their transitions through periods of drought and excess have been characterized, with precipitation and stream flows found to be currently close to their long-term average. The evidence also indicates that resolving precipitation and runoff trends amidst natural modes of variability will be challenging and unlikely within the next several decades. Abandonment of stationarity assumptions for the {\{}CRB{\}} is not necessarily supported by the evidence, making it premature to discard its historical record as an instrument by which to assess sustainability of water resource systems.},
author = {Murphy, Kevin W and Ellis, Andrew W},
doi = {10.1016/j.jhydrol.2013.11.056},
issn = {0022-1694},
journal = {Journal of Hydrology},
keywords = {Stationarity},
pages = {454--473},
title = {{An assessment of the stationarity of climate and stream flow in watersheds of the Colorado River Basin}},
url = {http://www.sciencedirect.com/science/article/pii/S0022169413008809},
volume = {509},
year = {2014}
}
@article{Shamseldin2010,
author = {Shamseldin, A},
doi = {10.2166/hydro.2010.027},
journal = {Journal of Hydroinformatics},
number = {1},
pages = {22--35},
title = {{Artificial neural network model for river flow forecasting in a developing country}},
url = {http://www.iwaponline.com/jh/012/0022/0120022.pdf},
volume = {12},
year = {2010}
}
@article{Prasad2005,
abstract = {Abstract Estimation of snowmelt runoff is very important in the Western Himalayan rivers in India where it is required to plan for hydropower generation and the water management during the non{\^{a}}€�monsoon season. An attempt has been made to estimate snowmelt runoff on a 10 day average basis in Beas Basin up to Pandoh Dam during May, 1998 and November, 1999 using a Snowmelt Runoff Model (SRM), which is a degree day method. The input parameters for the model are derived from existing maps, satellite data, metrological and hydrological data. The relief of the basin is divided into 12 elevation zones of 500 m each. The temperature was extrapolated to these elevation zones using temperature lapse rate calculated using the observed temperature at seven stations within the basin. Snow covered area in the basin was determined using Indian Remote Sensing Satellites IRS {\^{a}}€� 1C / 1D Wide Field Sensor (WIFS). The runoff from the snow covered area and snow free area was separately calculated in each elevation zone. The model parameter degree{\^{a}}€�day factor is taken from literature and runoff coefficients for snow and rain are derived using the observed data. The total discharge at the dam site is computed by a weighted sum of runoff components from all the elevation zones. There is a good agreement between the observed and computed runoff with a coefficient of determination of 0.854 and the difference in volume is + 4.6 {\%}.},
annote = {SRM in Beas; SRM model in Beas river basin; 0.854 in coefficient of determination ansd +4.6{\%} in volume; the importance of snowmelt water in Himalayan Rivers and less understood due to complexities and lack of data; model parameters, like degree dat factor and lapse rate},
author = {Prasad, Vajja Hari and Roy, Partha Sarathi},
doi = {10.1080/10106040508542344},
journal = {Geocarto International},
number = {2},
pages = {41--47},
title = {{Estimation of Snowmelt Runoff in Beas Basin, India}},
url = {http://www.tandfonline.com/doi/abs/10.1080/10106040508542344 http://www.tandfonline.com/doi/abs/10.1080/10106040508542344{\#}.VD-qHvnLdoN},
volume = {20},
year = {2005}
}
@article{Rasch1998,
author = {Rasch, P J and Kristj{\'{a}}nsson, J E},
doi = {10.1175/1520-0442(1998)011<1587:ACOTCM>2.0.CO;2},
journal = {Journal of Climate},
pages = {1587--1614},
title = {{A Comparison of the CCM3 Model Climate Using Diagnosed and Predicted Condensate Parameterizations}},
url = {http://folk.uio.no/jegill/papers/rasch{\_}kristjansson{\_}1998.pdf},
volume = {11},
year = {1998}
}
@misc{FAO2009,
author = {FAO},
keywords = {agricultural,agriculture,agro-business,biodiversity,biotechnology,bread,capacity building,codes of conduct,country-specific,desertification,disaster prevention,division,documents,drainage,early warning,economic policy,education,environment,ethics,extension,fao,farming,fisheries,flood,food,food security,forest,forestry,full-text publications,gender,genetic resources,geographic,hunger,integrated production systems,international,irrigation,land,livestock,maps,multimedia resources,nazioni unite,nu,nutrition,onu,organic,organisation des nations unies,organizaci{\'{o}}n de las naciones unidas,organization,participation,plant production,rain,regional info,rice,rural,safety,sanitation,social,statistics,sustainable development,trade,un,unit,united nations,wastewater,water,water cycle,water decade,water scarcity,watershed,wheat,world water day,world water week},
title = {{FAO-Water{\{}$\backslash$textemdash{\}}Water scarcity}},
url = {http://www.fao.org/nr/water/topics{\_}scarcity.html},
year = {2009}
}
@article{Yang2012,
abstract = {Projections of changes in climate extreme are important in assessing the potential impacts of climate change on social and natural systems. This article presents future projections of climate extremes in the Tibetan Plateau constructed from ensembles of coupled general circulation models (CGCMs) contributing to the Fourth Assessment Report of the Intergovernmental Panel on Climate Change (IPCC AR4), under a range of emission scenarios. The extremes of temperature and precipitation are described by seven indices, namely, the frost day (FD), percentage of nights when percentile (TN90), consecutive dry days (CDD), annual count of days when precipitation mm (R10), maximum 5-day precipitation total (R5D), simple daily intensity index (SDII), and annual total precipitation when precipitation percentile (R95T). Results indicate that frost days decrease over the Tibetan Plateau in the 21st century. More frequent warm nights are also projected in the plateau. The increases of these temperature extremes under {\{}A2{\}} and {\{}A1B{\}} scenarios are more pronounced than under B1. Heavy precipitation events for single days and pentads are projected to increase in their intensity over most parts of Tibetan Plateau. CDD, R10, R5D, {\{}R95T{\}} and {\{}SDII{\}} collectively suggest more extreme precipitation in the region (2011-2020). In addition, impacts of climate extremes changes on local water resources and fragile ecosystem are discussed as an extension of this article. The findings will be beneficial to project regional responses in this unique region to global climate change, and then to formulate regional strategies against the potential menaces of climate change.},
annote = {ensemble results of GCMs for Tibetan Plateau area;Heavy precipitation events for single days and pentads are projected to increase in their intensity over most parts of Tibetan Plateau. CDD, R10, R5D, R95T and SDII collectively suggest more extreme precipitation in the region (2011–2020).},
author = {Yang, Tao and Hao, Xiaobo and Shao, Quanxi and Xu, C.-Y. and Zhao, Chenyi and Chen, Xi and Wang, Weiguang},
doi = {10.1016/j.gloplacha.2011.08.006},
issn = {0921-8181},
journal = {Global and Planetary Change},
keywords = {climate extremes},
pages = {1--13},
title = {{Multi-model ensemble projections in temperature and precipitation extremes of the Tibetan Plateau in the 21st century}},
url = {http://www.sciencedirect.com/science/article/pii/S0921818111001408},
volume = {80-81},
year = {2012}
}
@article{gottlieb1980development,
author = {Gottlieb, Lars},
doi = {10.2166/nh.1980.020},
journal = {Nordic Hydrology},
number = {5},
pages = {255--272},
title = {{Development and {\{}A{\}}pplications of a {\{}R{\}}unoff {\{}M{\}}odel for {\{}S{\}}nowcovered and {\{}G{\}}lacierized {\{}B{\}}asins}},
url = {http://www.iwaponline.com/nh/011/nh0110255.htm},
volume = {11},
year = {1980}
}
@article{Skaugen2012,
annote = {the snow trend in Norway; high elevation has a positive trend and lower elevation has negative trend; in high elevation the precipitation is the main factor since temperature is far below the melting point; in lower elevation the temperature is more sensitive since it controls the melting rate},
author = {Skaugen, Thomas and Stranden, Heidi Bache and Saloranta, Tuomo},
doi = {10.2166/nh.2011.109},
journal = {Hydrology Research},
number = {4},
pages = {489--499},
publisher = {IWA Publishing},
title = {{Trends in snow water equivalent in Norway (1931--2009)}},
url = {http://www.iwaponline.com/nh/up/hr2010109.htm},
volume = {43},
year = {2012}
}
@article{Penas2016,
abstract = {Classification of flow regimes in water management and hydroecological research has grown significantly in recent years. However, depending on available data and the procedures applied, there may be several credible classifications for a specific catchment. In this study, three inductive classifications derived from different initial flow data and one expert-driven classification were defined. The hydrological interpretation, statistical performance and spatial correspondence of these classifications were compared. Daily Gauged Classification (DC) was derived from daily flow data while Monthly Gauged Classification (MC) and Monthly Modeled Classification (MMC) were derived from monthly flow series, using gauged and modeled flow data, respectively. Expert-Driven Classification (EDC) was based on a Spanish nationwide hydrological classification, which is being used in the current River Basin Management Plans. The results showed that MC accounted for much of the critical hydrological information variability comprised within the DC. However, it also presented limitations regarding the inability to represent important hydroecological attributes, especially those related to droughts and high flow events. In addition, DC and MC presented an equivalent performance more than 60{\%} of the time and obtained a mean ARI value of 0.4, indicating a similar classification structure. DC and MC outperformed MMC 100{\%} and more than 50{\%} of the times when they were compared by means of the classification strength and ANOVA, respectively. MMC also showed low correspondence with these classifications (ARI=0.20). Thus, the use of modeled flow series should be limited to poorly gauged areas. Finally, the significantly reduced performance and the uneven distribution of classes found in EDC questions its application for different management objectives. This study shows that the selection of the most suitable approach according to the available data has significant implications for the classification uses. Therefore, caution is recommended, especially if classifications are to be use in a normative manner.},
author = {Pe{\~{n}}as, Francisco J. and Barqu{\'{i}}n, Jos{\'{e}} and {\'{A}}lvarez, C{\'{e}}sar},
doi = {10.1016/j.jhydrol.2016.04.049},
issn = {00221694},
journal = {Journal of Hydrology},
keywords = {Eco-hydrology,Expert-driven,Flow classification,Inductive,Northern Iberian Peninsula,Simulated flow series,Time scale,Water management},
month = {jul},
pages = {487--499},
title = {{Sources of variation in hydrological classifications: Time scale, flow series origin and classification procedure}},
url = {http://www.sciencedirect.com/science/article/pii/S0022169416302426},
volume = {538},
year = {2016}
}
@article{greuell1992,
author = {Greuell, W},
journal = {Journal of Glaciology},
number = {129},
pages = {233--244},
publisher = {International Glaciological Society},
title = {{Hintereisferner, Austria: mass-balance reconstruction and numerical modelling of the historical length variations}},
volume = {38},
year = {1992}
}
@article{Yang1998,
author = {Yang, Daqing and Goodison, Barry E. and Ishida, Shig and Benson, Carl S.},
doi = {10.1029/97WR02681},
issn = {00431397},
journal = {Water Resources Research},
keywords = {Yang1998},
mendeley-tags = {Yang1998},
month = {feb},
number = {2},
pages = {241--256},
title = {{Adjustment of daily precipitation data at 10 climate stations in Alaska: Application of World Meteorological Organization intercomparison results}},
url = {http://doi.wiley.com/10.1029/97WR02681},
volume = {34},
year = {1998}
}
@article{Beniston2003,
author = {Beniston, Martin},
doi = {10.1023/A:1024458411589},
issn = {0165-0009},
journal = {Climatic Change},
keywords = {Snow; Glacier},
number = {1-2},
pages = {5--31},
publisher = {Kluwer Academic Publishers},
title = {{Climatic Change in Mountain Regions: A Review of Possible Impacts}},
url = {http://dx.doi.org/10.1023/A{\%}3A1024458411589},
volume = {59},
year = {2003}
}
@article{Seibert1999,
annote = {The goodness of runoff predictions using derived regional parameter sets was tested with variable results. Some relationships between lake percentage and soil parameters called the physical basis of the model into question as they could not be explained by the physical processes in the soil but by the dominating effect of lakes to runoff variations. On the other hand, relationships between forest percentage and snow parameters supported the physical basis of the model;HBV parameter; threshold melting temperature and recession coefficient of upper zone are the most constrained by the efficiency},
author = {Seibert, Jan},
doi = {10.1016/S0168-1923(99)00105-7},
issn = {0168-1923},
journal = {Agricultural and Forest Meteorology},
keywords = {Regionalisation},
pages = {279--293},
title = {{Regionalisation of parameters for a conceptual rainfall-runoff model}},
url = {http://www.sciencedirect.com/science/article/pii/S0168192399001057},
volume = {98-99},
year = {1999}
}
@article{Michaud1994,
annote = {Results of this study provides some insights into the difficulties of modelingt thunderstorm-generaterudn off in semiariwd atershedosf medium size; for flood forecasting; the distributed models were not able to outperform the semi-distributed and lumped model based on the same model concepts, e.g. SCS methods},
author = {Michaud, Jene and Sorooshian, Soroosh},
doi = {10.1029/93WR03218},
issn = {1944-7973},
journal = {Water Resources Research},
number = {3},
pages = {593--605},
title = {{Comparison of simple versus complex distributed runoff models on a midsized semiarid watershed}},
url = {http://dx.doi.org/10.1029/93WR03218},
volume = {30},
year = {1994}
}
@misc{Joshi2011,
author = {Joshi, Govinda},
title = {{Digital Elevation Model of Hindu Kush Himalayan (HKH) Region}},
url = {http://rds.icimod.org/Home/DataDetail?metadataId=8744{\&}searchlist=True},
year = {2011}
}
@article{Wagener2001,
annote = {multi-variable comparasion advantage; model calibration},
author = {Wagener, T and Boyle, D P and Lees, M J and Wheater, H S and Gupta, H V and Sorooshian, S},
doi = {10.5194/hess-5-13-2001},
journal = {Hydrology and Earth System Sciences},
number = {1},
pages = {13--26},
title = {{A framework for development and application of hydrological models}},
url = {http://www.hydrol-earth-syst-sci.net/5/13/2001/},
volume = {5},
year = {2001}
}
@article{arnold1996distributed,
author = {Arnold, N S and Willis, I C and Sharp, M J and Richards, K S and Lawson, W J},
journal = {Journal of Glaciology},
number = {140},
pages = {77--89},
publisher = {International Glaciological Society},
title = {{A distributed surface energy-balance model for a small valley glacier. I. Development and testing for Haut Glacier d'Arolla, Valais, Switzerland}},
url = {http://www.igsoc.org/journal.old/42/140/igs{\_}journal{\_}vol42{\_}issue140{\_}pg77-89.pdf},
volume = {42},
year = {1996}
}
@article{Rogelj2012,
abstract = {Climate projections for the fourth assessment report1 (AR4) of the Intergovernmental Panel on Climate Change (IPCC) were based on scenarios from the Special Report on Emissions Scenarios2 (SRES) and simulations of the third phase of the Coupled Model Intercomparison Project3 (CMIP3). Since then, a new set of four scenarios (the representative concentration pathways or RCPs) was designed4. Climate projections in the IPCC fifth assessment report (AR5) will be based on the fifth phase of the Coupled Model Intercomparison Project5 (CMIP5), which incorporates the latest versions of climate models and focuses on RCPs. This implies that by AR5 both models and scenarios will have changed, making a comparison with earlier literature challenging. To facilitate this comparison, we provide probabilistic climate projections of both SRES scenarios and RCPs in a single consistent framework. These estimates are based on a model set-up that probabilistically takes into account the overall consensus understanding of climate sensitivity uncertainty, synthesizes the understanding of climate system and carbon-cycle behaviour, and is at the same time constrained by the observed historical warming.},
annote = {A comparison between the climate effects of SRES and RCP scenarios indicates that the A1B scenario leads to a global mean temperature increase in the likely range of 2.8–4.2 C, which approximates to RCP6 and lies clearly between RCP4.5 and RCP8.5},
author = {Rogelj, Joeri and Meinshausen, Malte and Knutti, Reto},
doi = {10.1038/nclimate1385},
journal = {Nature Climate Change},
number = {4},
pages = {248--253},
publisher = {Nature Publishing Group},
title = {{Global warming under old and new scenarios using IPCC climate sensitivity range estimates}},
url = {http://www.nature.com/nclimate/journal/v2/n4/full/nclimate1385.html},
volume = {2},
year = {2012}
}
@article{Mhanna2012,
annote = {weather generators, evaluate based on statistics same as the calibration period},
author = {Mhanna, Muamaraldin and Bauwens, Willy},
doi = {10.1002/joc.2305},
issn = {08998418},
journal = {International Journal of Climatology},
month = {jun},
number = {7},
pages = {1098--1112},
title = {{A stochastic space-time model for the generation of daily rainfall in the Gaza Strip}},
url = {http://doi.wiley.com/10.1002/joc.2305},
volume = {32},
year = {2012}
}
@article{hess-17-3921-2013,
author = {M{\'{e}}n{\'{e}}goz, M and Gall{\'{e}}e, H and Jacobi, H W},
doi = {10.5194/hess-17-3921-2013},
journal = {Hydrology and Earth System Sciences},
number = {10},
pages = {3921--3936},
title = {{Precipitation and snow cover in the Himalaya: from reanalysis to regional climate simulations}},
url = {http://www.hydrol-earth-syst-sci.net/17/3921/2013/},
volume = {17},
year = {2013}
}
@article{Duan1992,
abstract = {The successful application of a conceptual rainfall-runoff (CRR) model depends on how well it is calibrated. Despite the popularity of CRR models, reports in the literature indicate that it is typically difficult, if not impossible, to obtain unique optimal values for their parameters using automatic calibration methods. Unless the best set of parameters associated with a given calibration data set can be found, it is difficult to determine how sensitive the parameter estimates (and hence the model forecasts) are to factors such as input and output data error, model error, quantity and quality of data, objective function used, and so on. Results are presented that establish clearly the nature of the multiple optima problem for the research CRR model SIXPAR. These results suggest that the CRR model optimization problem is more difficult than had been previously thought and that currently used local search procedures have a very low probability of successfully finding the optimal parameter sets. Next, the performance of three existing global search procedures are evaluated on the model SIXPAR. Finally, a powerful new global optimization procedure is presented, entitled the shuffled complex evolution (SCE-UA) method, which was able to consistently locate the global optimum of the SIXPAR model, and appears to be capable of efficiently and effectively solving the CRR model optimization problem.},
author = {Duan, Qingyun and Sorooshian, Soroosh and Gupta, Vijai},
doi = {10.1029/91WR02985},
issn = {1944-7973},
journal = {Water Resources Research},
number = {4},
pages = {1015--1031},
title = {{Effective and efficient global optimization for conceptual rainfall-runoff models}},
url = {http://onlinelibrary.wiley.com/doi/10.1029/91WR02985/abstract},
volume = {28},
year = {1992}
}
@article{Xu2005b,
annote = {actaul complementary model evaporation and measured data},
author = {Xu, C.-Y. and Chen, D},
doi = {10.1002/hyp.5853},
issn = {1099-1085},
journal = {Hydrological Processes},
keywords = {evapotranspiration,groundwater recharge,lysimeter,water balance},
number = {18},
pages = {3717--3734},
title = {{Comparison of seven models for estimation of evapotranspiration and groundwater recharge using lysimeter measurement data in Germany}},
volume = {19},
year = {2005}
}
@article{Rodhe1989,
abstract = {Isotope studies in Swedish till basins indicate that stream stormflow is normally dominated by pre-event water. The rapid response of the groundwater outflow to infiltration may be explained by a large increase in the hydraulic conductivity of the soil towards the ground surface. In homogeneous soils the effect of the capillary fringe may be important in building up large total head gradients towards the stream. In generating runoff peaks in the streams, the saturated discharge area contributes 100 {\%}, by saturation overland flow. Various parts of the recharge area contribute less than 100 {\%}, and less effectively the longer the distance to the recharge area is. The areal extent of the contributing recharge area is considerably larger than the discharge area.},
author = {Rodhe, Allan},
doi = {10.2166/nh.1989.001},
journal = {Nordic Hydrology},
number = {1},
pages = {1--8},
title = {{On the generation of stream runoff in till soils}},
url = {http://www.iwaponline.com/nh/020/0001/0200001.pdf},
volume = {20},
year = {1989}
}
@article{Hao2008,
annote = {Mann-Kendall trend and another change point detection method; climate change and human-actvity effects; increase in the upstream area due to climate change and negative trend in downstream due to anthropogenic activities},
author = {Hao, Xingming and Chen, Yaning and Xu, Changchun and Li, Weihong},
doi = {10.1007/s11269-007-9218-4},
issn = {0920-4741},
journal = {Water Resources Management},
keywords = {Climate change; Human activities; Surface runoff;},
number = {9},
pages = {1159--1171},
publisher = {Springer Netherlands},
title = {{Impacts of Climate Change and Human Activities on the Surface Runoff in the Tarim River Basin over the Last Fifty Years}},
url = {http://dx.doi.org/10.1007/s11269-007-9218-4},
volume = {22},
year = {2008}
}
@article{Burn2002,
annote = {Mann-Kendall method},
author = {Burn, Donald H and Elnur, Mohamed A Hag},
doi = {10.1016/S0022-1694(01)00514-5},
issn = {0022-1694},
journal = {Journal of Hydrology},
keywords = {Trend detection},
number = {1-4},
pages = {107--122},
title = {{Detection of hydrologic trends and variability}},
url = {http://www.sciencedirect.com/science/article/pii/S0022169401005145},
volume = {255},
year = {2002}
}
@article{Fiseha2014,
abstract = {The use of regional climate model (RCM) outputs has been getting due attention in most European River basins because of the availability of large number of the models and modelling institutes in the continent; and the relative robustness the models to represent local climate. This paper presents the hydrological responses to climate change in the Upper Tiber River basin (Central Italy) using bias corrected daily regional climate model outputs. The hydrological analysis include both control (1961-1990) and future (2071-2100) climate scenarios. Three RCMs (RegCM, RCAO, and PROMES) that were forced by the same lateral boundary condition under A2 and B2 emission scenarios were used in this study. The projected climate variables from bias corrected models have shown that the precipitation and temperature tends to decrease and increase in summer season, respectively. The impact of climate change on the hydrology of the river basin was predicted using physically based Soil and Water Assessment Tool (SWAT). The SWAT model was first calibrated and validated using observed datasets at the sub-basin outlet. A total of six simulations were performed under each scenario and RCM combinations. The simulated result indicated that there is a significant annual and seasonal change in the hydrological water balance components. The annual water balance of the study area showed a decrease in surface runoff, aquifer recharge and total basin water yield under A2 scenario for RegCM and RCAO RCMs and an increase in PROMES RCM under B2 scenario. The overall hydrological behaviour of the basin indicated that there will be a reduction of water yield in the basin due to projected changes in temperature and precipitation. The changes in all other hydrological components are in agreement with the change in projected precipitation and temperature. {\textcopyright} 2014 Springer Science+Business Media Dordrecht.},
author = {Fiseha, B M and Setegn, S G and Melesse, A M and Volpi, E and Fiori, A},
doi = {10.1007/s11269-014-0546-x},
issn = {09204741},
journal = {Water Resources Management},
keywords = {Bias correction,Climate change,Hydrological modeling,RCM,SWAT,Tiber River basin},
month = {feb},
number = {5},
pages = {1327--1343},
title = {{Impact of Climate Change on the Hydrology of Upper Tiber River Basin Using Bias Corrected Regional Climate Model}},
url = {http://www.scopus.com/inward/record.url?eid=2-s2.0-84897576816{\&}partnerID=40{\&}md5=60fda6d931be107d9509bc7b55e3c233},
volume = {28},
year = {2014}
}
@misc{WorldBank2014,
author = {{World Bank}},
title = {{Health Nutrition and Population Statistics: Population estimates and projections}},
url = {http://databank.worldbank.org/data/views/variableselection/selectvariables.aspx?source=health-nutrition-and-population-statistics:-population-estimates-and-projections},
year = {2014}
}
@article{Yadav2004,
author = {Yadav, Ram R and Park, Won-Kyu and Singh, Jayendra and Dubey, Bhasha},
doi = {10.1029/2004GL020201},
issn = {1944-8007},
journal = {Geophysical Research Letters},
number = {17},
pages = {L17201},
title = {{Do the western Himalayas defy global warming?}},
url = {http://dx.doi.org/10.1029/2004GL020201},
volume = {31},
year = {2004}
}
@article{Milly2005,
annote = {Water availability on the continents is important for human health, economic, ecosystem functions and geophysical process.runoff is a measure of sustainable water resources.},
author = {Milly, Paul C D and Dunne, Kathryn A and Vecchia, Aldo V},
doi = {10.1038/nature04312},
journal = {Nature},
number = {7066},
pages = {347--350},
publisher = {Nature Publishing Group},
title = {{Global pattern of trends in streamflow and water availability in a changing climate}},
url = {http://www.nature.com/nature/journal/v438/n7066/abs/nature04312.html},
volume = {438},
year = {2005}
}
@article{Oerlemans2007,
abstract = {Length records of two pairs of glaciers are used to reconstruct the equilibrium-line altitude (ELA) and to estimate glacier response times. The method is based on the assumption that neighbouring glaciers should be subject to the same climatic forcing, and that differences in the length records are thus caused by differences in response times and climate sensitivities. By means of a control method, in which the difference between the reconstructed histories of the ELA is minimized, realistic response times are found. The pairs of glaciers studied are: (i) Vadret da Morteratsch and Vadret da Pal{\"{u}} in the Swiss Alps and (ii) Briksdalsbreen and Nigardsbreen in southern Norway. In both cases the reconstructed ELA histories of the individual glaciers are very similar, in spite of the large differences in the length records. Short {\textless}i xmlns={\#}http://pub2web.metastore.ingenta.com/ns/{\#}{\textgreater}e{\textless}/i{\textgreater}-folding response times are found for the steep glaciers: 4.4 years for Vadret da Palii, 5.0 years for Briksdalsbreen. For the larger glaciers with a more gentle slope the response times are substantially larger: 33.0 years for Vadret da Morteratsch, 34.8 years for Nigardsbreen.},
author = {Oerlemans, J},
doi = {10.3189/002214307783258387},
journal = {Journal of Glaciology},
number = {182},
pages = {357--362},
title = {{Estimating response times of Vadret da Morteratsch, Vadret da Pal{\{}{\"{u}}{\}}, Briksdalsbreen and Nigardsbreen from their length records}},
url = {http://www.ingentaconnect.com/content/igsoc/jog/2007/00000053/00000182/art00003},
volume = {53},
year = {2007}
}
@techreport{Beldring2011,
author = {Beldring, Stein},
institution = {Norwegian Water Resources and Energy Directorate},
number = {4},
title = {{Climate change impacts on the flow regimes of rivers in Bhutan and possible consequences for hydropower development}},
url = {http://www.nve.no/Global/Publikasjoner/Publikasjoner 2011/Report 2011/report4-11.pdf},
year = {2011}
}
@article{Garen2005126,
abstract = {A spatially distributed energy balance snowmelt model has been applied to a km2 drainage basin in the Boise River, ID, USA, to simulate the accumulation and melt of the snowpack for the years 1998-2000. The simulation was run at a time step and a spatial resolution of 250{\&}{\#}xa0;m. Spatial field time series of meteorological input data were obtained using various spatial interpolation and simulation methods. The variables include precipitation, air temperature, dew point temperature, wind speed, and solar and thermal radiation. The goal was to use readily available data and relatively straightforward, yet physically meaningful, methods to develop the spatial fields. With these meteorological fields as input, the simulated fields of snow water equivalent, snow depth, and snow covered area reproduce observations very well. The simulated snowmelt fields are also used as input to a spatially distributed hydrologic model to estimate streamflow. This gives an additional verification of the snowmelt modelling results as well as provides a linkage of the two models to generate hydrographs for water management information. This project is a demonstration of spatially distributed energy balance snowmelt modelling in a large mountainous catchment using data from existing meteorological networks. This capability then suggests the potential for developing new spatial hydrologic informational products and the possibility of improving the accuracy of the prediction of hydrologic processes for water and natural resources management. },
author = {Garen, David C and Marks, Danny},
doi = {10.1016/j.jhydrol.2005.03.026},
issn = {0022-1694},
journal = {Journal of Hydrology},
keywords = {Spatial interpolation},
number = {1-4},
pages = {126--153},
title = {{Spatially distributed energy balance snowmelt modelling in a mountainous river basin: estimation of meteorological inputs and verification of model results}},
url = {http://www.sciencedirect.com/science/article/pii/S0022169405001836},
volume = {315},
year = {2005}
}
@article{Liu2000,
author = {Liu, Xiaodong and Chen, Baode},
doi = {10.1002/1097-0088(20001130)20:14<1729::AID-JOC556>3.0.CO;2-Y},
issn = {1097-0088},
journal = {International Journal of Climatology},
keywords = {Tibetan Plateau,climatic trend analysis,linear regression,surface air temperature},
number = {14},
pages = {1729--1742},
publisher = {John Wiley {\&} Sons, Ltd.},
title = {{Climatic warming in the Tibetan Plateau during recent decades}},
url = {http://dx.doi.org/10.1002/1097-0088(20001130)20:14{\textless}1729::AID-JOC556{\textgreater}3.0.CO;2-Y},
volume = {20},
year = {2000}
}
@article{Saloranta2012,
abstract = {The article offers information on the simulation of the snow maps for Norway, evaluating the seNorge snow model. It states that due to the general over-estimation of snow amounts in the seNorge-simulated snow maps, one has often been bound to use relative values of snow conditions instead of absolute values in practical applications, such as flood forecasting and hydropwer production planning.},
author = {Saloranta, T. M.},
doi = {10.5194/tc-6-1323-2012},
issn = {19940416},
journal = {Cryosphere},
pages = {1323--1337},
title = {{Simulating snow maps for Norway: Description and statistical evaluation of the seNorge snow model}},
volume = {6},
year = {2012}
}
@article{1748-9326-11-4-044021,
abstract = {Mountain regions and the important ecosystem services they provide are considered to be very vulnerable to the current warming, and recent studies suggest that high-mountain environments experience more rapid changes in temperature than environments at lower elevations. Here we analysed weather records for the period 1975–2010 from the Eastern Italian Alps that show that warming occurred both at high and low elevations, but it was less pronounced at high elevations. This negative elevation–dependent trend was consistent for mean, maximum and minimum air temperature. Global radiation data measured at different elevations, surface energy fluxes measured above an alpine grassland and above a coniferous forest located at comparable elevations for nine consecutive years as well as remote sensing data (MODIS) for cloud cover and aerosol optical depth were analysed to interpret this observation. Increasing global radiation at low elevations turned out to be a potential driver of this negative elevation–dependent warming, but also contributions from land use and land cover changes at high elevations (abandonment of alpine pastures, expansion of secondary forest succession) were taken into account. We emphasise though, that a negative elevation–dependent warming is not universal and that future research and in particular models should not neglect the role of land use changes when determining warming rates over elevation.},
author = {Tudoroiu, M and Eccel, E and Gioli, B and Gianelle, D and Schume, H and Genesio, L and Miglietta, F},
journal = {Environmental Research Letters},
number = {4},
pages = {44021},
title = {{Negative elevation-dependent warming trend in the Eastern Alps}},
url = {http://stacks.iop.org/1748-9326/11/i=4/a=044021},
volume = {11},
year = {2016}
}
@article{Chen2002,
author = {Chen, H and Rao, A},
doi = {10.1061/(ASCE)1084-0699(2002)7:2(129)},
journal = {Journal of Hydrologic Engineering},
number = {2},
pages = {129--136},
title = {{Testing Hydrologic Time Series for Stationarity}},
url = {http://dx.doi.org/10.1061/(ASCE)1084-0699(2002)7:2(129)},
volume = {7},
year = {2002}
}
@article{Thirel2015,
abstract = {AbstractThe ability of hydrological models to deal with changing conditions should not be taken for granted: it is an unfortunate but well-known problem of hydrology that the model structure and/or parameters optimized for certain conditions may not be transferable in time. Consequently, it is essential that, for application under changing conditions (e.g. in climate change impact studies), models be thoroughly assessed for their extrapolation capacity using adequate protocols. This editorial provides an overview of the Special Issue of Hydrological Sciences Journal compiled after a workshop on this theme held during the General Assembly of the International Association of Hydrological Sciences (IAHS) in Gothenburg (Sweden) in 2013. The Workshop participants had been invited to apply a calibration and evaluation protocol to their own models on a given set of changing basins. The results show that this protocol is an appropriate and instructive way of assessing the suitability of hydrological models to be ...},
author = {Thirel, Guillaume and Andr{\'{e}}assian, Vazken and Perrin, Charles},
doi = {10.1080/02626667.2015.1050027},
issn = {0262-6667},
journal = {Hydrological Sciences Journal},
keywords = {calibration protocol,comparison,evaluation,hydrological models,hydrology under change},
language = {en},
month = {may},
publisher = {Taylor {\&} Francis},
title = {{On the need to test hydrological models under changing conditions}},
url = {http://www.tandfonline.com/doi/abs/10.1080/02626667.2015.1050027},
volume = {in press},
year = {2015}
}
@article{Engelhardt2013,
abstract = {Glacier mass balance in Norway is only observed over a small portion of the glacierized surface and only for short time periods for most sites. To provide a comprehensive overview of the temporal mass-balance evolution, we modeled surface mass balance for the
glacierized area of mainland Norway from 1961 to 2010. The model is forced by operationally gridded daily temperature and precipitation fields which are available at 1 km horizontal resolution from 1957 until the present. The applied mass-balance model accounts for melting of snow and ice
by using a distributed temperature-index approach. The precipitation input is corrected to obtain agreement between modeled and observed winter mass balance, and a melt factor and two radiation coefficients are optimized to the corresponding summer balance. The model results show positive
trends of winter balance between 1961 and 2000 followed by a remarkable decrease in both summer and winter balances which resulted in an average annual balance of between 2000 and 2010 after four decades of zero to slightly positive annual
mass balances.},
author = {Engelhardt, Markus and Schuler, Thomas V and Andreassen, Liss M},
doi = {10.3189/2013AoG63A245},
journal = {Annals of Glaciology},
number = {63},
pages = {32--40},
title = {{Glacier mass balance of Norway 1961{\{}$\backslash$textendash{\}}2010 calculated by a temperature-index model}},
url = {http://dx.doi.org/10.1111/j.1468-0459.2012.00473.x},
volume = {54},
year = {2013}
}
@article{HYP:HYP1095,
abstract = {This study investigated using Monte Carlo simulation the interaction between a linear trend and a lag-one autoregressive (AR(1)) process when both exist in a time series. Simulation experiments demonstrated that the existence of serial correlation alters the variance of the estimate of the Mann–Kendall (MK) statistic; and the presence of a trend alters the estimate of the magnitude of serial correlation. Furthermore, it was shown that removal of a positive serial correlation component from time series by pre-whitening resulted in a reduction in the magnitude of the existing trend; and the removal of a trend component from a time series as a first step prior to pre-whitening eliminates the influence of the trend on the serial correlation and does not seriously affect the estimate of the true AR(1). These results indicate that the commonly used pre-whitening procedure for eliminating the effect of serial correlation on the MK test leads to potentially inaccurate assessments of the significance of a trend; and certain procedures will be more appropriate for eliminating the impact of serial correlation on the MK test. In essence, it was advocated that a trend first be removed in a series prior to ascertaining the magnitude of serial correlation. This alternative approach and the previously existing approaches were employed to assess the significance of a trend in serially correlated annual mean and annual minimum streamflow data of some pristine river basins in Ontario, Canada. Results indicate that, with the previously existing procedures, researchers and practitioners may have incorrectly identified the possibility of significant trends. Copyright {\textcopyright} Environment Canada. Published by John Wiley {\&} Sons, Ltd.},
author = {Yue, Sheng and Pilon, Paul and Phinney, Bob and Cavadias, George},
doi = {10.1002/hyp.1095},
issn = {1099-1085},
journal = {Hydrological Processes},
keywords = {Mann–Kendall test,nonparametric test,pre-whitening,serial correlation,statistical hydrology,time series analysis,trend analysis},
number = {9},
pages = {1807--1829},
publisher = {John Wiley {\&} Sons, Ltd.},
title = {{The influence of autocorrelation on the ability to detect trend in hydrological series}},
url = {http://dx.doi.org/10.1002/hyp.1095},
volume = {16},
year = {2002}
}
@article{Rupper2012,
author = {Rupper, Summer and Schaefer, Joerg M and Burgener, Landon K and Koenig, Lora S and Tsering, Karma and Cook, Edward R},
doi = {10.1029/2012GL053010},
journal = {Geophysical Research Letters},
number = {19},
publisher = {Wiley Online Library},
title = {{Sensitivity and response of Bhutanese glaciers to atmospheric warming}},
url = {http://academiccommons.columbia.edu/catalog/ac{\%}3A154816},
volume = {39},
year = {2012}
}
@article{Pfeffer2014,
author = {Pfeffer, W Tad and Arendt, Anthony A and Bliss, Andrew and Bolch, Tobias and Cogley, J Graham and Gardner, Alex S and Hagen, Jon-Ove and Hock, Regine and Kaser, Georg and Kienholz, Christian and Miles, Evan S and Moholdt, Geir and M{\"{o}}lg, Nico and Paul, Frank and Radi{\'{c}}, Valentina and Rastner, Philipp and Raup, Bruce H and Rich, Justin and Sharp, Martin J},
doi = {10.3189/2014JoG13J176},
journal = {Journal of Glaciology},
number = {221},
pages = {537},
title = {{The Randolph Glacier Inventory: a globally complete inventory of glaciers}},
url = {http://www.ingentaconnect.com/content/igsoc/jog/2014/00000060/00000221/art00012},
volume = {60},
year = {2014}
}
@article{Tang2012,
author = {Tang, Qiuhong and Vivoni, Enrique R and Mu{\~{n}}oz-Arriola, Francisco and Lettenmaier, Dennis P},
doi = {10.1175/JHM-D-11-032.1},
journal = {Journal of Hydrometeorology},
number = {1},
pages = {103--121},
title = {{Predictability of evapotranspiration patterns using remotely sensed vegetation dynamics during the North American monsoon}},
url = {http://journals.ametsoc.org/doi/abs/10.1175/JHM-D-11-032.1},
volume = {13},
year = {2012}
}
@article{Sicart2008,
author = {Sicart, Jean Emmanuel and Hock, Regine and Six, Delphine},
doi = {10.1029/2008JD010406},
issn = {0148-0227},
journal = {Journal of Geophysical Research},
month = {dec},
number = {D24},
pages = {D24113},
title = {{Glacier melt, air temperature, and energy balance in different climates: The Bolivian Tropics, the French Alps, and northern Sweden}},
url = {http://doi.wiley.com/10.1029/2008JD010406},
volume = {113},
year = {2008}
}
@article{Bruland2015,
author = {Bruland, Oddbj{\o}rn and F{\ae}rev{\aa}g, {\AA}shild. and Steinsland, Ingelin and Liston, Glen E and Sand, Knut},
doi = {10.2166/nh.2015.059},
journal = {Hydrology Research},
title = {{Weather SDM {\{}$\backslash$textemdash{\}} A model for estimating {\{}S{\}}now {\{}D{\}}ensity with high precision using snow depth and local climate}},
url = {http://www.iwaponline.com/nh/up/nh2015059.htm},
volume = {in press},
year = {2015}
}
@article{Saetrang1986,
author = {S{\ae}trang, Arne Chr and Wold, Bj{\o}rn},
journal = {Annals of glaciology},
pages = {156--158},
title = {{Results from the radio echo-sounding on parts of the Jostedalsbreen ice cap, Norway}},
url = {http://www.igsoc.org:8080/annals/8/igs{\_}annals{\_}vol08{\_}year1985{\_}pg156-158.pdf},
volume = {8},
year = {1986}
}
@article{Oerlemans1986,
author = {Oerlemans, J},
doi = {10.1007/BF00867846},
issn = {0177-798X},
journal = {Theoretical and Applied Climatology},
number = {3},
pages = {126--135},
publisher = {Springer-Verlag},
title = {{An attempt to simulate historic front variations of Nigardsbreen, Norway}},
url = {http://dx.doi.org/10.1007/BF00867846},
volume = {37},
year = {1986}
}
@article{Bergstroem1991,
annote = {good simulation was not related to complex model structure. physically based usually used in small scale, more based on grids while concept more based on catchment. good performance did not mean the the model described the system correctly.},
author = {Bergstr{\"{o}}m, Sten},
doi = {10.2166/nh.1991.009},
journal = {Nordic Hydrology},
number = {2},
pages = {123--136},
title = {{Principles and confidence in hydrological modelling}},
url = {http://www.iwaponline.com/nh/022/nh0220123.htm},
volume = {22},
year = {1991}
}
@article{Ferguson1999,
abstract = {Models that predict meltwater runoff at a daily timescale are important in water resource management, flood hazard assessment and climate-change impact studies. This article identifies four basic components of such models: meteorological extrapolation, snowmelt estimation at a point, snow-cover depletion and runoff routing. Alternative ways of handling these are discussed, with emphasis on the contrasting treatments in two widely used models: HBV and SRM. Many of the issues in meltwater modelling reflect wider debates in hydrological and environmental modelling, including problems of complexity vs. simplicity, the appropriate level of spatial disaggregation, parameter identification and calibration, and internal validation. In reviewing current trends emphasis is placed on the potential and limitations of fully distributed models, problems in using energy-balance rather than temperature-index melt models at basin scale, ways to deal with spatial variability in snow cover, and the value and limitations of earth observation data.},
author = {Ferguson, R I},
doi = {10.1177/030913339902300203},
journal = {Progress in Physical Geography},
number = {2},
pages = {205--227},
title = {{Snowmelt runoff models}},
url = {http://ppg.sagepub.com/content/23/2/205.abstract},
volume = {23},
year = {1999}
}
@article{Vieli2015,
author = {Vieli, Andreas},
doi = {10.1038/ngeo2425},
issn = {1752-0894},
journal = {Nature Geoscience},
language = {en},
month = {apr},
number = {5},
pages = {332--333},
publisher = {Nature Publishing Group},
title = {{Glacier change: Dynamic projections}},
url = {http://www.nature.com/ngeo/journal/v8/n5/full/ngeo2425.html?WT.ec{\_}id=NGEO-201505},
volume = {8},
year = {2015}
}
@article{LeMeur2007367,
abstract = {A spatially-distributed snow/ice model is used to simulate the surface mass balance of the Saint Sorlin Glacier (French Alps) over the 1981-2004 period. The modeled mass balance globally reproduces field data except over places where, because of the scarcity of measurements, small-scale features as proposed by the model are smoothed out by the data interpolation. Both measured and simulated mass balance fields are then used to force a 2-D ice flow model and comparison of respective results show similar large-scale glacier flow dynamics. On the other hand, at a smaller scale, the present-day ice distribution computed from the modeled mass balance field sometimes deviates from that obtained with the interpolated field mass balance. It particularly offers a better match to observations by succeeding in reproducing a specific deglaciation pattern in the upper part of the glacier. These preliminary results led us to consider the possibility of substituting modeled mass balance series to measured ones, especially when modeling the future of the glacier. This latter approach is thus applied to simulate the glacier response under the {\{}IPCC{\}} {\{}SRESB1{\}} scenario. Results show a rapid decay leading to a total disappearance of the glacier by the year 2070. },
author = {Meur, E Le and Gerbaux, M and Sch{\"{a}}fer, M and Vincent, C},
doi = {10.1016/j.epsl.2007.07.022},
issn = {0012-821X},
journal = {Earth and Planetary Science Letters},
keywords = {glacier},
number = {3-4},
pages = {367--374},
title = {{Disappearance of an Alpine glacier over the 21st Century simulated from modeling its future surface mass balance}},
url = {http://www.sciencedirect.com/science/article/pii/S0012821X07004372},
volume = {261},
year = {2007}
}
@techreport{trHBV1,
annote = {the first HBV model publication},
author = {Bergstr{\"{o}}m, Sten},
institution = {Swedish Meteorological and Hydrological Institute},
number = {07},
title = {{Development and application of a conceptual runoff model for Scandinavian catchments}},
url = {http://books.google.no/books?id=vRyeQAAACAAJ},
year = {1976}
}
@article{Bolch20071,
abstract = {This paper presents an analysis of precipitation and temperature trends and a GIS-supported investigation of the related glacier change in the mountain ridges Zailiyskiy and Kungey Alatau, which represent an important part of the northern Tien Shan. The recent glacier coverage was delineated in a semi-automated way using a TM4/TM5 ratio image of a Landsat {\{}ETM{\}} Scene from the year 1999 and a merged ASTER/SRTM3-DEM. The extent of these glaciers is compared to that of the glaciers in the Soviet Glacier Inventory [UdSSR, Academica Nauk (1966 to 1983). Katalog Lednikov {\{}SSSR{\}} (in Russian), Gidrometeoizdat. Leningrad], which represents the situation in study area in approx. 1955. Regionalization of temperature and precipitation as well as solar radiation calculation was conducted in order to determine the climate situation at the glaciers. Trend and correlation analysis for the period from 1879 to 2000 at 16 climate stations showed a temperature increase, which have become pronounced since the 1950s. Another strong increase occurred at the beginning of the 1970s and since around 1980, the temperatures have generally stayed at this high level. The trend coefficient was about 0.8{\^{A}} K/100a for the period 1900 to 2000 and about 2.0{\^{A}} K/100a on average for the second half of the last century. The increase was about two times higher than the global average in northern Tien Shan from 1950 until 2000, where the increase was mainly due to temperature rise in autumn and winter. The increase is less pronounced in the mountainous areas, but still obvious. However, the higher temperature increase at the lower stations, located for the most part in cities or larger settlements, may be due in part to increased urbanization. For precipitation, there was a small increase on average, but no clear trend. On the average, the decrease in glacier extent was more than 32{\%} between 1955 and 1999 in the investigated valleys of Zailiyskiy and Kungey Alatau. The glacier retreat was not homogeneous, but depended strongly on the size, location and climate regime at the glaciers. The area loss of the continental-type glaciers with very predominant summer accumulation, as for those situated in the deeply incised Chon-Kemin valley between Zailiyskiy and Kungey Alatau, was conspicuously less, in parts, than the loss at the more maritime glaciers on the northern slope of Zailiyskiy Alatau. This is consistent with the small increase in summer temperatures. However, under dryer conditions with high solar radiation input, such as with glaciers in the Chon-Aksu valley in Kungey Alatau, the area retreat of the continental-type glaciers can be even more pronounced than that of the more maritime glaciers. },
annote = {Climate Change Impacts on Mountain Glaciers and Permafrost},
author = {Bolch, Tobias},
doi = {10.1016/j.gloplacha.2006.07.009},
issn = {0921-8181},
journal = {Global and Planetary Change},
keywords = {glacier retreat},
number = {1-2},
pages = {1--12},
title = {{Climate change and glacier retreat in northern Tien Shan (Kazakhstan/Kyrgyzstan) using remote sensing data}},
url = {http://www.sciencedirect.com/science/article/pii/S0921818106001536},
volume = {56},
year = {2007}
}
@article{Ye1997,
annote = {The models were run daily but performance was assessed on both a daily and monthly basis by aggregating daily model streamflows and observations up to monthly. In many applications model users are more interested in monthly runoff than in daily totals. The models are designed to provide daily predictions, so these totals were simply accumulated to give the monthly predictions.},
author = {Ye, W and Bates, B C and Viney, N R and Sivapalan, M and Jakeman, A J},
doi = {10.1029/96WR02840},
issn = {1944-7973},
journal = {Water Resources Research},
number = {1},
pages = {153--166},
title = {{Performance of conceptual rainfall-runoff models in low-yielding ephemeral catchments}},
url = {http://dx.doi.org/10.1029/96WR02840},
volume = {33},
year = {1997}
}
@article{Gosain2011,
author = {Gosain, A K and Rao, Sandhya and Arora, Anamika},
journal = {Current Science},
number = {3},
pages = {356--371},
title = {{Climate change impact assessment of water resources of India}},
url = {http://web.a.ebscohost.com/abstract?direct=true{\&}profile=ehost{\&}scope=site{\&}authtype=crawler{\&}jrnl=00113891{\&}AN=67548570{\&}h=5rLppCNQmS9XoNdyL{\%}2fuAsg1b6yp0U{\%}2bV{\%}2f3bf7S4cqT0vanHI73gahuTO5drOouu{\%}2bWSyxi8OU0upmN80wyzJThNA{\%}3d{\%}3d{\&}crl=c{\&}resultNs=AdminWebAuth{\&}resultLo},
volume = {101},
year = {2011}
}
@article{Braun2000,
abstract = {The water balance of Alpine regions is strongly determined by the storage of water in the form of snow and ice. On the basis of long time series of daily precipitation, air temperature and discharge, the conceptual runoff model HBV3-ETH9 was applied to various basins of the eastern Alps showing a glacierization of 0{\&}{\#}8211;80{\%}. Using the results of regional climate modelling under the assumption of doubling of CO{\textless}sub xmlns={\#}http://pub2web.metastore.ingenta.com/ns/{\#}{\textgreater}2{\textless}/sub{\textgreater}, the meteorological input data files were altered taking into account more frequent hot days and additional convective precipitation events during the summer months, and the consequences of these changes for daily discharge were evaluated. The results show that in regions with insignificant glacierization, runoff reacts primarily to changes in precipitation, and less so to rising summer air temperature. In highly glacierized basins, however, the same scenarios suggest strongly enhanced water yields in an initial phase. Higher flood peaks will result when high melt rates and heavy summer rains coincide. If glacier mass losses continue in the more distant future, the glacierized area will diminish and summer discharge will be gradually reduced, resulting in drastic water shortages in hot, dry summers once the glaciers have disappeared.},
author = {Braun, L N and Weber, M and Schulz, M},
doi = {10.3189/172756400781820165},
journal = {Annals of Glaciology},
number = {1},
pages = {19--25},
title = {{Consequences of climate change for runoff from Alpine regions}},
url = {http://www.ingentaconnect.com/content/igsoc/agl/2000/00000031/00000001/art00005},
volume = {31},
year = {2000}
}
@article{Koboltschnig2008,
annote = {hydrological models; runoff generation based on HBV; and snow fracion data used},
author = {Koboltschnig, Gernot R and Sch{\"{o}}ner, Wolfgang and Zappa, Massimiliano and Kroisleitner, Christine and Holzmann, Hubert},
doi = {10.1002/hyp.7112},
issn = {1099-1085},
journal = {Hydrological Processes},
keywords = {SCA remote sensing,glacier mass balance,glacier melt,snow melt,water balance of high elevation sites},
number = {19},
pages = {3950--3964},
title = {{Runoff modelling of the glacierized Alpine Upper Salzach basin (Austria): multi-criteria result validation}},
url = {http://onlinelibrary.wiley.com/doi/10.1002/hyp.7112/abstract},
volume = {22},
year = {2008}
}
@article{Singh200655,
abstract = {Summary The present study describes the hydrological characteristics of the Gangotri Glacier (286{\&}{\#}xa0;km2), which is one of the largest Himalayan Glaciers. The study involves collection and analysis of streamflow records near the snout of the Gangotri Glacier during four consecutive ablation seasons (May-October) (2000-2003). Discharge increases from May onward, reaches its highest value in July and then starts decreasing. Daily mean discharge during the study period varied between 8 and 194{\&}{\#}xa0;m3{\&}{\#}xa0;s{\^{a}}ˆ'1. The distribution of runoff has shown that July contributes maximum runoff (30.2{\%}) followed by August (26.2{\%}). Maximum diurnal variability in runoff was observed in the month of May and September. The strong storage characteristics of the study glacier are reflected by a comparable magnitude of runoff observed during daytime and nighttime. Diurnal variations in hydrograph suggested almost similar pattern from year to year, being maximum runoff in the evening and minimum in the morning. Melt-runoff delaying characteristics reflected that over the melt season time lag (tl) varied between 4.00 and 7.30{\&}{\#}xa0;h, whereas time to peak (tp) varied between 9.00 and 12.30{\&}{\#}xa0;h. Relationship between mean monthly discharge and temperature was found to be much better (R2{\&}{\#}xa0;={\&}{\#}xa0;0.76) than that on daily scale (R2{\&}{\#}xa0;={\&}{\#}xa0;0.50).},
author = {Singh, Pratap and Haritashya, Umesh K and Kumar, Naresh and Singh, Yatveer},
doi = {10.1016/j.jhydrol.2005.11.060},
issn = {0022-1694},
journal = {Journal of Hydrology},
keywords = {Gangotri Glacier},
number = {1-2},
pages = {55--67},
title = {{Hydrological characteristics of the Gangotri Glacier, central Himalayas, India}},
url = {http://www.sciencedirect.com/science/article/pii/S0022169405005986},
volume = {327},
year = {2006}
}
@inproceedings{Chiew2005,
annote = {SIMHYD is one of the most commonly used rainfall-runoff models in Australia, and is one of the rainfall-runoff models in RRL (Rainfall-Runoff Library) in the Catchment Modelling Toolkit. Nash-Sutcliffe model efficiency values greater than 0.7; In general, E values greater than 0.6 suggest a reasonable modelling of runoff and E values greater than 0.8 suggest a good modelling of runoff for catchment yield studies},
author = {Chiew, F H S and Siriwardena, L},
booktitle = {Modelling and Simulation Society of Australia and New Zealand},
editor = {Zerger, Andre and Argent, Robert M},
pages = {2883--2889},
series = {International Congress on Modelling and Simulation (MODSIM 2005)},
title = {{Estimation Of SIMHYD Parameter Values For Application In Ungauged Catchments}},
url = {http://www.mssanz.org.au/modsim05/papers/chiew{\_}2.pdf},
volume = {Top-Down m},
year = {2005}
}
@article{Das2008,
annote = {HBV model; finer representation and lumped model comparision; called distributed actually smaller catchments},
author = {Das, Tapash and B{\'{a}}dossy, Andr{\'{a}}s and Zehe, Erwin and He, Yi},
doi = {10.1016/j.jhydrol.2008.04.008},
issn = {0022-1694},
journal = {Journal of Hydrology},
keywords = {Distributed modelling},
number = {1-2},
pages = {106--118},
title = {{Comparison of conceptual model performance using different representations of spatial variability}},
url = {http://www.sciencedirect.com/science/article/pii/S002216940800173X},
volume = {356},
year = {2008}
}
@misc{sandrp2015,
author = {SANDRP},
month = {feb},
title = {{Hydro Electric Projects in Beas River Basin}},
url = {http://sandrp.in/basin{\_}maps/Hydropower{\_}Projects{\_}in{\_}Beas{\_}Basin.pdf},
year = {2015}
}
@techreport{Dyrrdal2009,
author = {Dyrrdal, Anita Verpe},
title = {{Trend analysis of number of snow days per winter season in Norway}},
url = {http://met.no/Forskning/Publikasjoner/MET{\_}report/2009/filestore/metReport{\_}072009.pdf},
year = {2009}
}
@article{Shamseldin1997,
abstract = {The present paper promotes the concept of combining the estimated output of different rainfall-runoff models to produce an overall combined estimated output to be used as an alternative to that obtained from a single individual rainfall-runoff model. Three methods of combining model outputs are considered, namely the simple average method (SAM), the weighted average method (WAM) and the neural network method (NNM). The estimated discharges of five rainfall-runoff models for 11 catchments are used to test the performance of these three combination methods. The results confirm that better discharge estimates can be obtained by combining the model outputs of different models.},
author = {Shamseldin, Asaad Y and O'Connor, Kieran M and Liang, G C},
doi = {10.1016/S0022-1694(96)03259-3},
issn = {0022-1694},
journal = {Journal of Hydrology},
number = {1-4},
pages = {203--229},
title = {{Methods for combining the outputs of different rainfall-runoff models}},
url = {http://www.sciencedirect.com/science/article/pii/S0022169496032593},
volume = {197},
year = {1997}
}
@techreport{IngerH1998,
author = {Hanssen-Bauer, I and F{\o}rland, E J},
isbn = {27/98 KLIMA},
number = {27/98},
pages = {pp.37},
title = {{Annual and seasonal precipitation variations in Norway 1896-1997}},
url = {http://met.no/Forskning/Publikasjoner/MET{\_}report/1998/filestore/27{\_}98.pdf},
year = {1998}
}
@book{otnes1971,
author = {Otnes, J and R{\ae}stad, E},
publisher = {Ingeni{\{}{\o}{\}}rforlaget},
title = {{Hydrology in Practice (in Norwegian)}},
url = {http://books.google.no/books?id=wKOjQAAACAAJ},
year = {1971}
}
@article{Chen2012,
abstract = {In this study a rigorous evaluation and comparison of the difference in water balance simulations resulted from using different downscaling techniques, GCMs and hydrological models is performed in upper Hanjiang basin in China. The study consists of the following steps: (1) the NCEP/NCAR reanalysis data for the period 1961–2000 are used to calibrate and validate the statistical downscaling techniques, i.e. SSVM (Smooth Support Vector Machine) and SDSM (Statistical Downscaling Model); (2) the A2 emission scenarios from CGCM3 and HadCM3 for the same period are used as input to the statistical downscaling models; and (3) the downscaled local scale climate scenarios are then used as the input to the Xin-anjiang and HBV hydrological models. The results show that: (1) for the same GCM, the simulated runoffs vary greatly when using rainfall provided by different statistical downscaling techniques as the input to the hydrological models; (2) although most widely used statistics in the literature for evaluation of statistical downscaling methods show SDSM has better performance than SSVM in downscaling rainfall except the Nash–Sutcliffe efficiency (NSC) and root mean square error-observations standard deviation ratio (RSR), the runoff simulation efficiency driven by SDSM rainfall is far lower than by SSVM; and (3) by comparing different statistics in rainfall and runoff simulation, it can be concluded that NSC and RSR between simulated and observed rainfall can be used as key statistics to evaluate the statistical downscaling models' performance when downscaled precipitation scenarios are used as input for hydrological models.},
author = {Chen, Hua and Xu, Chong-Yu and Guo, Shenglian},
doi = {10.1016/j.jhydrol.2012.02.040},
issn = {00221694},
journal = {Journal of Hydrology},
keywords = {China,Climate change,GCM,Hanjiang basin,Hydrological models,Statistical downscaling},
month = {apr},
pages = {36--45},
title = {{Comparison and evaluation of multiple GCMs, statistical downscaling and hydrological models in the study of climate change impacts on runoff}},
url = {http://www.sciencedirect.com/science/article/pii/S0022169412001539 http://folk.uio.no/chongyux/papers{\_}SCI/jhydrol{\_}28.pdf},
volume = {434-435},
year = {2012}
}
@article{XU2009,
author = {XU, JIANCHU and GRUMBINE, R EDWARD and SHRESTHA, ARUN and ERIKSSON, MATS and YANG, XUEFEI and WANG, Y U N and WILKES, ANDREAS},
doi = {10.1111/j.1523-1739.2009.01237.x},
issn = {1523-1739},
journal = {Conservation Biology},
keywords = {Himalayas,alpine ecosystem,cascading effects,climate change,glaciers,water resources},
number = {3},
pages = {520--530},
title = {{The Melting Himalayas: Cascading Effects of Climate Change on Water, Biodiversity, and Livelihoods}},
url = {http://www.ncbi.nlm.nih.gov/pubmed/22748090},
volume = {23},
year = {2009}
}
@article{raey,
author = {Jain, SanjayK. and Thakural, L N and Singh, R D and Lohani, A K and Mishra, S K},
doi = {10.1007/s11069-010-9696-1},
issn = {0921-030X},
journal = {Natural Hazards},
keywords = {MODIS; Snow cover area; Temperature; Digital eleva},
number = {3},
pages = {891--904},
publisher = {Springer Netherlands},
title = {{Snow cover depletion under changed climate with the help of remote sensing and temperature data}},
url = {http://dx.doi.org/10.1007/s11069-010-9696-1},
volume = {58},
year = {2011}
}
@misc{t-test2015,
author = {CRAN},
title = {{R: Student's t-Test}},
url = {https://stat.ethz.ch/R-manual/R-patched/library/stats/html/t.test.html},
urldate = {2015-04-04},
year = {2015}
}
@article{Singh2004,
abstract = {The present study sets out to investigate the sensitivity of water availability to climate change for a large western Himalayan river (the Satluj River basin with an area of 22 275 km2 and elevation range of 500 to 7000 m), which receives contributions from rain, snow and glacier melt runoff. About 65{\%} of the basin area is covered with snow during winter, which reduces to about 11{\%} after the ablation period. After having calibrated a conceptual hydrological model to provide accurate simulations of observed stream flow, the hydrological response of the basin was simulated using different climatic scenarios over a period of 9 years. Adopted plausible climate scenarios included three temperature scenarios (T + 1, T + 2, T + 3 {\^{A}}°C) and four rainfall scenarios (P {\^{a}}ˆ' 10, P {\^{a}}ˆ' 5, P + 5 and P + 10{\%}). The effect of climate change was studied on snowmelt and rainfall contribution runoff, and total stream flow. Under warmer climate, a typical feature of the study basin was found to be reduction in melt from the lower part of the basin owing to a reduction in snow covered area and shortening of the summer melting season, and, in contrast, an increase in the melt from the glacierized part owing to larger melt and an extended ablation period. Thus, on the basin scale, reduction in melt from the lower part was counteracted by the increase from melt from upper part of the basin, resulting in a decrease in the magnitude of change in annual melt runoff. The impact of climate change was found to be more prominent on seasonal rather than annual water availability. Reduction of water availability during the summer period, which contributes about 60{\%} to the annual flow, may have severe implications on the water resources of the region, because demand of water for irrigation, hydropower and other usage is at its peak at this time. Copyright {\^{A}}{\textcopyright} 2004 John Wiley {\&} Sons, Ltd.},
annote = {WASMOD application in Satluj River; much more glacier melting due to warming},
author = {Singh, Pratap and Bengtsson, Lars},
doi = {10.1002/hyp.1468},
issn = {1099-1085},
journal = {Hydrological Processes},
keywords = {climate change,hydrological sensitivity,snowmelt runoff,water availability},
number = {13},
pages = {2363--2385},
publisher = {John Wiley {\&} Sons, Ltd.},
title = {{Hydrological sensitivity of a large Himalayan basin to climate change}},
url = {http://dx.doi.org/10.1002/hyp.1468},
volume = {18},
year = {2004}
}
@article{Frank1983,
abstract = {Abstract In the past two decades there has been extensive research into the nature of atmospheric convection and scale interactions in cumulus regimes. A major goal of these efforts has been to advance the state of the art in cumulus parameterization. This paper reviews the cumulus parameterization problem in terms of fundamental principles, goals and dynamics constraints as they apply to parameterization in mesoscale and large scale numerical models. Several popular current schemes are discussed in terms of their relationships to these overall aspects of the problem.},
author = {Frank, William M.},
doi = {10.1175/1520-0493(1983)111<1859:TCPP>2.0.CO;2},
issn = {0027-0644},
journal = {Monthly Weather Review},
language = {EN},
month = {sep},
number = {9},
pages = {1859--1871},
title = {{The Cumulus Parameterization Problem}},
url = {http://journals.ametsoc.org/doi/abs/10.1175/1520-0493(1983)111{\%}3C1859{\%}3ATCPP{\%}3E2.0.CO{\%}3B2},
volume = {111},
year = {1983}
}
@article{Pechlivanidis2015,
author = {Pechlivanidis, I G and Arheimer, B},
doi = {10.5194/hess-19-4559-2015},
journal = {Hydrology and Earth System Sciences},
number = {11},
pages = {4559--4579},
title = {{Large-scale hydrological modelling by using modified PUB recommendations: the India-HYPE case}},
url = {http://www.hydrol-earth-syst-sci.net/19/4559/2015/},
volume = {19},
year = {2015}
}
@article{Immerzeel200940,
abstract = {Various remote sensing products are used to identify spatial-temporal trends in snow cover in river basins originating in the Himalayas and adjacent Tibetan-Qinghai plateau. It is shown that remote sensing allows detection of spatial-temporal patterns of snow cover across large areas in inaccessible terrain, providing useful information on a critical component of the hydrological cycle. Results show large variation in snow cover between years while an increasing trend from west to east is observed. Of all river basins the Indus basin is, for its water resources, most dependent on snow and ice melt and large parts are snow covered for prolonged periods of the year. A significant negative winter snow cover trend was identified for the upper Indus basin. For this basin a hydrological model is used and forced with remotely sensed derived precipitation and snow cover. The model is calibrated using daily discharges from 2000 to 2005 and stream flow in the upper Indus basin can be predicted with a high degree of accuracy. From the analysis it is concluded that there are indications that regional warming is affecting the hydrology of the upper Indus basin due to accelerated glacial melting during the simulation period. This warming may be associated with global changes in air temperature resulting from anthropogenic forcings. This conclusion is primarily based on the observation that the average annual precipitation over a five year period is less than the observed stream flow and supported by positive temperature trends in all seasons.},
author = {Immerzeel, W W and Droogers, P and de Jong, S M and Bierkens, M F P},
doi = {10.1016/j.rse.2008.08.010},
issn = {0034-4257},
journal = {Remote Sensing of Environment},
keywords = {MODIS; TRMM; Snow cover; Runoff; Climate Change; I},
number = {1},
pages = {40--49},
title = {{Large-scale monitoring of snow cover and runoff simulation in Himalayan river basins using remote sensing}},
url = {http://www.sciencedirect.com/science/article/pii/S0034425708002575},
volume = {113},
year = {2009}
}
@misc{Evans2013,
author = {Evans, John and Periman, Howard},
howpublished = {Website},
month = {feb},
title = {{Water-Cycle Diagram (English)}},
url = {http://upload.wikimedia.org/wikipedia/commons/1/19/Watercyclesummary.jpg},
year = {2015}
}
@article{Engelhardt2012,
author = {Engelhardt, Markus and Schuler, Thomas Vikhamar and Anderson, Liss Marie},
doi = {10.1111/j.1468-0459.2012.00473.x},
issn = {1468-0459},
journal = {Geografiska Annaler: Series A, Physical Geography},
keywords = {Norway,glacier mass balance,gridded precipitation,seNorge},
number = {4},
pages = {501--509},
publisher = {Blackwell Publishing Ltd},
title = {{Evaluation of gridded precipitation for Norway using glacier mass-balance measurements}},
url = {http://dx.doi.org/10.1111/j.1468-0459.2012.00473.x},
volume = {94},
year = {2012}
}
@article{Skahill2006,
author = {Skahill, Brian E and Doherty, John},
doi = {10.1016/j.jhydrol.2006.02.005},
issn = {0022-1694},
journal = {Journal of Hydrology},
keywords = {Calibration},
number = {1-2},
pages = {122--139},
title = {{Efficient accommodation of local minima in watershed model calibration}},
url = {http://www.sciencedirect.com/science/article/pii/S0022169406000734},
volume = {329},
year = {2006}
}
@article{Beldring2002189,
abstract = {The multi-criteria calibration procedure MOCOM-UA was used to evaluate the validity of a physically based precipitation-runoff model by forcing the model to simulate several observed system responses simultaneously. The model is based on kinematic wave approximations to saturated subsurface flow and saturation overland flow at the hillslope scale in a landcape with a shallow layer of permeable deposits overlying a relatively impermeable bedrock. The following results were found; (i) the MOCOM-UA method was capable of exploiting information about the physical system contained in the measurement data time series; (ii) the multi-criteria calibration procedure provided estimates of the uncertainty associated with model predictions and parameters; (iii) multi-criteria calibration constraining the behavior of the precipitation-runoff model to observed runoff and groundwater levels reduced the uncertainty of model predictions; (iv) the multi-criteria method reduced the uncertainty of the estimates of model parameters; (v) the precipitation-runoff model was able to reproduce several observed system responses simultaneously during both calibration and validation periods; and (vi) the groundwater table depths exerted a major control on the hydrological response of the investigated catchment.},
author = {Beldring, Stein},
doi = {10.1016/S0022-1694(01)00541-8},
issn = {0022-1694},
journal = {Journal of Hydrology},
keywords = {Precipitation-runoff model},
number = {1-4},
pages = {189--211},
title = {{Multi-criteria validation of a precipitation runoff model}},
url = {http://www.sciencedirect.com/science/article/pii/S0022169401005418},
volume = {257},
year = {2002}
}
@article{Jouvet2008,
abstract = {We propose a novel Eulerian algorithm to compute the changes of a glacier geometry for given mass balances. The surface of a glacier is obtained by solving a transport equation for the volume of fluid (VOF). The surface mass balance is taken into account by adding an interfacial term in the transport equation. An unstructured mesh with standard stabilized finite elements is used to solve the non-linear Stokes problem. The VOF function is computed on a structured grid with a high resolution. The algorithm is stable for Courant numbers larger than unity and conserves mass to a high accuracy. To demonstrate the potential of the algorithm, we apply it to reconstructed Late-glacial states of a small valley glacier, Vadret Muragl, in the Swiss Alps.},
address = {LENSFIELD RD, CAMBRIDGE CB2 1ER, ENGLAND},
author = {Jouvet, Guillaume and Picasso, Marco and Rappaz, Jacques and Blatter, Heinz},
doi = {10.3189/002214308787780049},
issn = {0022-1430},
journal = {Journal of Glaciology},
number = {188},
pages = {801--811},
publisher = {INT GLACIOL SOC},
title = {{A new algorithm to simulate the dynamics of a glacier: theory and applications}},
type = {Article},
url = {http://www.ingentaconnect.com/content/igsoc/jog/2008/00000054/00000188/art00004},
volume = {54},
year = {2008}
}
@article{Gao2012,
annote = {catchment actual evaporation in Haihe River Basin},
author = {Gao, Ge and Xu, C.-Y. and Chen, Deliang and Singh, V},
doi = {10.1007/s00477-011-0525-1},
issn = {1436-3240},
journal = {Stochastic Environmental Research and Risk Assessment},
keywords = {Complementary relationship; Thornthwaite water bal},
number = {5},
pages = {655--669},
title = {{Spatial and temporal characteristics of actual evapotranspiration over Haihe River basin in China}},
volume = {26},
year = {2012}
}
@article{Bookhagen2010,
annote = {The hydrological budget of Himalayan rivers is dominated by monsoonal rainfall and snowmelt, but their relative impact is not well established because this remote region lacks a dense gauge network. the spatiotemporal distribution of rainfall, snowfall, and evapotranspiration in order to quantify their relative contribution to mean river discharge. As a fraction of the total annual discharge, snowmelt constitutes up to 50{\%} in the far western (Indus area) catchments, ∼25{\%} in far eastern (Tsangpo) catchments, and},
author = {Bookhagen, Bodo and Burbank, Douglas W},
doi = {10.1029/2009JF001426},
issn = {2156-2202},
journal = {Journal of Geophysical Research: Earth Surface},
keywords = {erosion,monsoon,orographic rainfall},
number = {F3},
pages = {F03019},
title = {{Toward a complete Himalayan hydrological budget: Spatiotemporal distribution of snowmelt and rainfall and their impact on river discharge}},
url = {http://dx.doi.org/10.1029/2009JF001426},
volume = {115},
year = {2010}
}
@article{Gottschalk1979,
abstract = {A reviewed report of a Nordic working group on Hydrologic regions is presented in this paper. The emphasis is mainly put on runoff regime patterns in the Nordic countries. Maps over runoff regimes, annual runoff and variations coefficient of runoff are presented. For Finland a more detailed regime map is given also.},
annote = {Hydrological region to runoff, high and low flow},
author = {Gottschalk, Lars and Jensen, J{\o}rgen Lundager and Lundquist, Dan and Solantie, Reijo and Tollan, Arne},
file = {:C$\backslash$:/Users/holi/AppData/Local/Mendeley Ltd./Mendeley Desktop/Downloaded/Gottschalk et al. - 1979 - Hydrologic Regions in the Nordic Countries.pdf:pdf},
journal = {Hydrology Research},
month = {oct},
number = {5},
pages = {273 LP -- 286},
title = {{Hydrologic Regions in the Nordic Countries}},
url = {http://hr.iwaponline.com/content/10/5/273.abstract},
volume = {10},
year = {1979}
}
@misc{CIA2015,
author = {CIA},
month = {may},
title = {{The World Factbook}},
url = {https://www.cia.gov/library/publications/resources/the-world-factbook/docs/contact.html},
year = {2015}
}
@article{tc-4-115-2010,
abstract = {A large number of Himalayan glacier catchments are under the influence of humid climate with snowfall in winter (November–April) and south-west monsoon in summer (June–September) dominating the regional hydrology. Such catchments are defined as "Himalayan catchment", where the glacier meltwater contributes to the river flow during the period of annual high flows produced by the monsoon.},
annote = {characteristic of hymalaya glaciers},
author = {Thayyen, R J and Gergan, J T},
doi = {10.5194/tc-4-115-2010},
journal = {The Cryosphere},
number = {1},
pages = {115--128},
title = {{Role of glaciers in watershed hydrology: a preliminary study of a "Himalayan catchment"}},
url = {http://www.the-cryosphere.net/4/115/2010/},
volume = {4},
year = {2010}
}
@article{Azam2014,
author = {Azam, Mohd Farooq and Wagnon, Patrick and Vincent, Christian and Ramanathan, Alagappan and Linda, Anurag and Singh, Virendra Bahadur},
doi = {10.3189/2014AoG66A104},
issn = {02603055},
journal = {Annals of Glaciology},
month = {may},
number = {66},
pages = {69--80},
publisher = {International Glaciological Society},
title = {{Reconstruction of the annual mass balance of Chhota Shigri glacier, Western Himalaya, India, since 1969}},
url = {https://www.researchgate.net/publication/263013567{\_}Reconstruction{\_}of{\_}the{\_}annual{\_}mass{\_}balance{\_}of{\_}Chhota{\_}Shigri{\_}glacier{\_}Western{\_}Himalaya{\_}India{\_}since{\_}1969},
volume = {55},
year = {2014}
}
@article{Gleick1986,
abstract = {Concern over changes in global climate caused by rising atmospheric concentrations of carbon dioxide and other trace gases has increased in recent years as our understanding of atmospheric dynamics and global climate systems has improved. Yet despite a better understanding of climatic processes, many of the effects of human-induced climatic changes are still poorly understood. The most profound effect of such climatic changes may be major alterations in regional hydrologic cycles and changes in regional water availability. Unfortunately, these are among the least well-understood impacts. This paper reviews approaches for evaluating the regional hydrologic impacts of global climatic changes and presents a series of criteria for choosing among the different methods. One approach the use of modified water-balance models appears to offer significant advantages over other methods in accuracy, flexibility, and ease of use. Water-balance models are especially useful for identifying the regional hydrologic consequences of changes in temeprature, precipitation, and other climatic variables. The ability of water-balance models to incorporate month-to-month or seasonal variations in climate, snowfall and snowmelt algorithms, groundwater fluctuations, soil moisture characteristics, and natural climatic variability makes them especially attractive for water-resource studies of climatic changes. Furthermore, such methods can be combined with state-of-the-art information from general circulation models of the climate and with plausible hypothetical climate-change scenarios to generate information on the water-resource implications of future climatic changes.},
annote = {for standard of hydrological impact modeling: six limating factors and modifeid water balance model},
author = {Gleick, Peter H},
doi = {10.1016/0022-1694(86)90199-X},
issn = {0022-1694},
journal = {Journal of Hydrology},
number = {1-2},
pages = {97--116},
title = {{Methods for evaluating the regional hydrologic impacts of global climatic changes}},
url = {http://www.sciencedirect.com/science/article/pii/002216948690199X},
volume = {88},
year = {1986}
}
@article{Huss2015,
abstract = {The anticipated retreat of glaciers around the globe will pose far-reaching challenges to the management of fresh water resources and significantly contribute to sea-level rise within the coming decades. Here, we present a new model for calculating the 21st century mass changes of all glaciers on Earth outside the ice sheets. The Global Glacier Evolution Model (GloGEM) includes mass loss due to frontal ablation at marine-terminating glacier fronts and accounts for glacier advance/retreat and surface Elevation changes. Simulations are driven with monthly near-surface air temperature and precipitation from 14 Global Circulation Models forced by the RCP2.6, RCP4.5 and RCP8.5 emission scenarios. Depending on the scenario, the model yields a global glacier volume loss of 25-48{\%} between 2010 and 2100. For calculating glacier contribution to sea-level rise, we account for ice located below sea-level presently displacing ocean water. This effect reduces glacier contribution by 11-14{\%}, so that our model predicts a sea-level equivalent (multi-model mean +-1 standard deviation) of 79+-24 mm (RCP2.6), 108+-28 mm (RCP4.5) and 157+-31 mm (RCP8.5). Mass losses by frontal ablation account for 10{\%} of total ablation globally, and up to 30{\%} regionally. Regional equilibrium line altitudes are projected to rise by 100-800 m until 2100, but the effect on ice wastage depends on initial glacier hypsometries.},
author = {Huss, Matthias and Hock, Regine},
doi = {10.3389/feart.2015.00054},
file = {::},
isbn = {doi:10.3389/feart.2015.00054},
issn = {2296-6463},
journal = {Frontiers in Earth Science},
keywords = {Climate Change,Glacier mass balance,Glacier retreat,SEA-LEVEL RISE,frontal ablation,glaciers,global,projections},
language = {English},
month = {sep},
publisher = {Frontiers},
title = {{A new model for global glacier change and sea-level rise}},
url = {http://journal.frontiersin.org/article/10.3389/feart.2015.00054/abstract},
volume = {3},
year = {2015}
}
@article{Jacob2012,
author = {Jacob, Daniela and Elizalde, Alberto and Haensler, Andreas and Hagemann, Stefan and Kumar, Pankaj and Podzun, Ralf and Rechid, Diana and Remedio, Armelle Reca and Saeed, Fahad and Sieck, Kevin and Teichmann, Claas and Wilhelm, Christof},
doi = {10.3390/atmos3010181},
issn = {2073-4433},
journal = {Atmosphere},
number = {1},
pages = {181--199},
title = {{Assessing the Transferability of the Regional Climate Model REMO to Different COordinated Regional Climate Downscaling EXperiment (CORDEX) Regions}},
url = {http://www.mdpi.com/2073-4433/3/1/181},
volume = {3},
year = {2012}
}
@article{Habets2010,
annote = {level can get the flood area and good calibration results do not mean good formulation.},
author = {Habets, F and Gascoin, S and Korkmaz, S and Thi{\'{e}}ry, D and Zribi, M and Amraoui, N and Carli, M and Ducharne, A and Leblois, E and Ledoux, E and Martin, E and Noilhan, J and Ottl{\'{e}}, C and Viennot, P},
doi = {10.5194/hess-14-99-2010},
journal = {Hydrology and Earth System Sciences},
number = {1},
pages = {99--117},
title = {{Multi-model comparison of a major flood in the groundwater-fed basin of the Somme River (France)}},
url = {http://www.hydrol-earth-syst-sci.net/14/99/2010/},
volume = {14},
year = {2010}
}
@article{Gan1997,
author = {Gan, Thian Yew and Dlamini, Enoch M and Biftu, Getu Fana},
doi = {10.1016/S0022-1694(96)03114-9},
issn = {0022-1694},
journal = {Journal of Hydrology},
number = {1-4},
pages = {81--103},
title = {{Effects of model complexity and structure, data quality, and objective functions on hydrologic modeling}},
url = {http://www.sciencedirect.com/science/article/pii/S0022169496031149},
volume = {192},
year = {1997}
}
@article{Pepin2015,
abstract = {There is growing evidence that the rate of warming is amplified with elevation, such that high-mountain environments experience more rapid changes in temperature than environments at lower elevations. Elevation-dependent warming (EDW) can accelerate the rate of change in mountain ecosystems, cryospheric systems, hydrological regimes and biodiversity. Here we review important mechanisms that contribute towards EDW: snow albedo and surface-based feedbacks; water vapour changes and latent heat release; surface water vapour and radiative flux changes; surface heat loss and temperature change; and aerosols. All lead to enhanced warming with elevation (or at a critical elevation), and it is believed that combinations of these mechanisms may account for contrasting regional patterns of EDW. We discuss future needs to increase knowledge of mountain temperature trends and their controlling mechanisms through improved observations, satellite-based remote sensing and model simulations.},
author = {Pepin, N. and Bradley, R. S. and Diaz, H. F. and Baraer, M. and Caceres, E. B. and Forsythe, N. and Fowler, H. and Greenwood, G. and Hashmi, M. Z. and Liu, X. D. and Miller, J. R. and Ning, L. and Ohmura, A. and Palazzi, E. and Rangwala, I. and Sch{\"{o}}ner, W. and Severskiy, I. and Shahgedanova, M. and Wang, M. B. and Williamson, S. N. and Yang, D. Q.},
doi = {10.1038/nclimate2563},
issn = {1758-678X},
journal = {Nature Climate Change},
month = {apr},
number = {5},
pages = {424--430},
publisher = {Nature Publishing Group, a division of Macmillan Publishers Limited. All Rights Reserved.},
shorttitle = {Nature Clim. Change},
title = {{Elevation-dependent warming in mountain regions of the world}},
url = {http://dx.doi.org/10.1038/nclimate2563},
volume = {5},
year = {2015}
}
@article{Refsgaard2014,
author = {Refsgaard, J C and Madsen, H and Andr{\'{e}}assian, V and Arnbjerg-Nielsen, K and Davidson, T A and Drews, M and Hamilton, D P and Jeppesen, E and Kjellstr{\"{o}}m, E and Olesen, J E and Sonnenborg, T O and Trolle, D and Willems, P and Christensen, J H},
doi = {10.1007/s10584-013-0990-2},
issn = {0165-0009},
journal = {Climatic Change},
number = {1-2},
pages = {271--282},
publisher = {Springer Netherlands},
title = {{A framework for testing the ability of models to project climate change and its impacts}},
url = {http://dx.doi.org/10.1007/s10584-013-0990-2},
volume = {122},
year = {2014}
}
@article{Zhao1992,
abstract = {The Xinanjiang model is a rainfall-runoff, distributed, basin model for use in humid and semi-humid regions. The evapotranspiration component is represented by a model of three soil layers. Runoff production occurs on repletion of storage to capacity values which are assumed to be distributed throughout the basin. Prior to 1980, runoff was separated into surface and groundwater components using Horton's concept of infiltration. Subsequently, the concept of hillslope hydrology was introduced with an additional component, interflow, being identified. Runoff concentration to the outflow of each sub-basin is represented by a unit hydrograph or by a lag and route technique. The damping or routing effects of the channel system connecting the sub-basins are represented by Muskingum routing. There are fifteen parameters in all, of which the model is particularly sensitive to six. Optimization of the parameters is achieved with different objective functions according to the nature of each parameter. The model has been widely used in China since 1980, mainly for flood forecasting, though more recently it is also being used for other purposes.},
annote = {structure and application of Xin'anjiang Model},
author = {Zhao, RenJun},
doi = {10.1016/0022-1694(92)90096-E},
issn = {0022-1694},
journal = {Journal of Hydrology},
number = {1–4},
pages = {371--381},
title = {{The Xinanjiang model applied in China}},
url = {http://www.sciencedirect.com/science/article/pii/002216949290096E},
volume = {135},
year = {1992}
}
@article{Srivastava2014,
author = {Srivastava, Deepak and Kumar, Amit and Verma, Akshaya and Swaroop, Siddharth},
doi = {10.1007/s11269-014-0653-8},
issn = {0920-4741},
journal = {Water Resources Management},
month = {jun},
number = {10},
pages = {3035--3055},
title = {{Analysis of Climate and Melt-runoff in Dunagiri Glacier of Garhwal Himalaya (India)}},
url = {http://link.springer.com/10.1007/s11269-014-0653-8},
volume = {28},
year = {2014}
}
@article{Carey2013,
abstract = {Summary Glacier shrinkage caused by climate change is likely to trigger diminished and less consistent stream flow in glacier-fed watersheds worldwide. To understand, model, and adapt to these climate-glacier-water changes, it is vital to integrate the analysis of both water availability (the domain of hydrologists) and water use (the focus for social scientists). Drawn from a case study of the Santa River watershed below Peru?€™s glaciated Cordillera Blanca mountain range, this paper provides a holistic hydro-social framework that identifies five major human variables critical to hydrological modeling because these forces have profoundly influenced water use over the last 60{\&}{\#}xa0;years: (1) political agendas and economic development; (2) governance: laws and institutions; (3) technology and engineering; (4) land and resource use; and (5) societal responses. Notable shifts in Santa River water use?€��?including major expansions in hydroelectricity generation, large-scale irrigation projects, and other land and resource-use practices?€��?did not necessarily stem from changing glacier runoff or hydrologic shifts, but rather from these human variables. Ultimately, then, water usage is not predictable based on water availability alone. Glacier runoff conforms to certain expected trends predicted by models of progressively reduced glacier storage. However, societal forces establish the legal, economic, political, cultural, and social drivers that actually shape water usage patterns via human modification of watershed dynamics. This hydro-social framework has widespread implications for hydrological modeling in glaciated watersheds from the Andes and Alps to the Himalaya and Tien Shan, as well as for the development of climate change adaptation plans.},
annote = {Glacier shrinkage caused by climate change is likely to trigger diminished and less consistent stream flow in glacier-fed watersheds worldwide; laciers produce an initial increase in runoff as they lose mass in conditions of continuous glacier retreat. The discharge then reaches a plateau called “peak water��? and subsequently declines as the volume of glacial ice continues to decrease. This post-peak phase of water decline is characterized by decreases in the annual and dry-season discharge of glacier runoff, as well as simultaneous increases in discharge variability},
author = {Carey, Mark and Baraer, Michel and Mark, Bryan G and French, Adam and Bury, Jeffrey and Young, Kenneth R and McKenzie, Jeffrey M},
doi = {10.1016/j.jhydrol.2013.11.006},
issn = {0022-1694},
journal = {Journal of Hydrology},
keywords = {Glacial melt Climate change Glacier runoff modelin},
title = {{Toward hydro-social modeling: Merging human variables and the social sciences with climate-glacier runoff models (Santa River, Peru)}},
url = {http://www.sciencedirect.com/science/article/pii/S0022169413008159},
year = {2013}
}
@article{Georgakakos2004,
abstract = {Distributed hydrologic modeling holds significant promise for improved estimates of streamflow with high spatial resolution. However, uncertainty in model structure and parameters, which are distributed in space, and in operational weather radar rainfall estimates, which comprise the main input to the models, contributes to significant uncertainty in distributed model streamflow simulations over a wide range of space and time scales. Using the simulations produced for the Distributed Model Intercomparison Project (DMIP), this paper develops and applies sample-path methods to characterize streamflow simulation uncertainty by diverse distributed hydrologic models. The emphasis in this paper is on the model parameter and structure uncertainty given radar rainfall forcing. Multimodel ensembles are analyzed for six application catchments in the Central US to characterize model structure uncertainty within the sample of models (both calibrated and uncalibrated) participating in DMIP. Ensembles from single distributed and lumped models are also used for one of the catchments to provide a basis to characterize the impact of parametric uncertainty versus model structure uncertainty in flow simulation statistics. Two main science questions are addressed: (a) what is the value of multimodel streamflow ensembles in terms of the probabilistic characterization of simulation uncertainty? And (b) how do probabilistic skill measures of multimodel versus single-model ensembles compare? Discussed also are implications for the operational use of streamflow ensembles generated by distributed hydrologic models. The results support the serious consideration of ensemble simulations and predictions created by diverse models in real time flow prediction.},
annote = {multi-model ensemble simulation both in calibrated and uncalibrated way},
author = {Georgakakos, Konstantine P and Seo, Dong-Jun and Gupta, Hoshin and Schaake, John and Butts, Michael B},
doi = {10.1016/j.jhydrol.2004.03.037},
issn = {0022-1694},
journal = {Journal of Hydrology},
keywords = {Multimodel ensemble prediction},
number = {1-4},
pages = {222--241},
title = {{Towards the characterization of streamflow simulation uncertainty through multimodel ensembles}},
url = {http://www.sciencedirect.com/science/article/pii/S002216940400246X},
volume = {298},
year = {2004}
}
@article{Hempel2013,
abstract = {Statistical bias correction is commonly applied within climate impact modelling to correct climate model data for systematic deviations of the simulated historical data from observations. Methods are based on transfer functions generated to map the distribution of the simulated historical data to that of the observations. Those are subsequently applied to correct the future projections. Here, we present the bias correction method that was developed within ISI-MIP, the first Inter-Sectoral Impact Model Intercomparison Project. ISI-MIP is designed to synthesise impact projections in the agriculture, water, biome, health, and infrastructure sectors at different levels of global warming. 

Bias-corrected climate data that are used as input for the impact simulations could be only provided over land areas. To ensure consistency with the global (land + ocean) temperature information the bias correction method has to preserve the warming signal. Here we present the applied method that preserves the absolute changes in monthly temperature, and relative changes in monthly values of precipitation and the other variables needed for ISI-MIP. The proposed methodology represents a modification of the transfer function approach applied in the Water Model Intercomparison Project (Water-MIP). Correction of the monthly mean is followed by correction of the daily variability about the monthly mean. 

Besides the general idea and technical details of the ISI-MIP method, we show and discuss the potential and limitations of the applied bias correction. In particular, while the trend and the long-term mean are well represented, limitations with regards to the adjustment of the variability persist which may affect, e.g. small scale features or extremes.},
annote = {Bias correction method},
author = {Hempel, S and Frieler, K and Warszawski, L and Schewe, J and Piontek, F},
doi = {10.5194/esd-4-219-2013},
journal = {Earth System Dynamics},
number = {2},
pages = {219--236},
title = {{A trend-preserving bias correction{\{}$\backslash$textemdash{\}}the ISI-MIP approach}},
url = {http://www.earth-syst-dynam.net/4/219/2013/},
volume = {4},
year = {2013}
}
@article{Huss2011,
author = {Huss, Matthias},
doi = {10.1029/2010WR010299},
issn = {1944-7973},
journal = {Water Resources Research},
keywords = {future glacier retreat,glacier melt,macroscale drainage basins,runoff,water availability},
number = {7},
pages = {W07511},
title = {{Present and future contribution of glacier storage change to runoff from macroscale drainage basins in Europe}},
url = {http://dx.doi.org/10.1029/2010WR010299},
volume = {47},
year = {2011}
}
@article{WRCR:WRCR10098,
abstract = {This paper develops a Bayesian approach to analysis of a generalized least squares (GLS) regression model for regional analyses of hydrologic data. The new approach allows computation of the posterior distributions of the parameters and the model error variance using a quasi-analytic approach. Two regional skew estimation studies illustrate the value of the Bayesian GLS approach for regional statistical analysis of a shape parameter and demonstrate that regional skew models can be relatively precise with effective record lengths in excess of 60 years. With Bayesian GLS the marginal posterior distribution of the model error variance and the corresponding mean and variance of the parameters can be computed directly, thereby providing a simple but important extension of the regional GLS regression procedures popularized by Tasker and Stedinger (1989), which is sensitive to the likely values of the model error variance when it is small relative to the sampling error in the at-site estimator.},
annote = {W10419},
author = {Reis, D S and Stedinger, J R and Martins, E S},
doi = {10.1029/2004WR003445},
issn = {1944-7973},
journal = {Water Resources Research},
keywords = {Extreme events,Floods,GLS regression,Monitoring networks,Precipitation,Uncertainty assessment,log Pearson type 3,regional skew},
number = {10},
pages = {n/a----n/a},
title = {{Bayesian generalized least squares regression with application to log Pearson type 3 regional skew estimation}},
url = {http://dx.doi.org/10.1029/2004WR003445},
volume = {41},
year = {2005}
}
@article{Sharmila2015,
abstract = {Abstract In this study, the impact of enhanced anthropogenic greenhouse gas emissions on the possible future changes in different aspects of daily-to-interannual variability of Indian summer monsoon (ISM) is systematically assessed using 20 coupled models participated in the Coupled Model Inter-comparison Project Phase 5. The historical (1951{\^{a}}€“1999) and future (2051{\^{a}}€“2099) simulations under the strongest Representative Concentration Pathway have been analyzed for this purpose. A few reliable models are selected based on their competence in simulating the basic features of present-climate {\{}ISM{\}} variability. The robust and consistent projections across the selected models suggest substantial changes in the {\{}ISM{\}} variability by the end of 21st century indicating strong sensitivity of {\{}ISM{\}} to global warming. On the seasonal scale, the all-India summer monsoon mean rainfall is likely to increase moderately in future, primarily governed by enhanced thermodynamic conditions due to atmospheric warming, but slightly offset by weakened large scale monsoon circulation. It is projected that the rainfall magnitude will increase over core monsoon zone in future climate, along with lengthening of the season due to late withdrawal. On interannual timescales, it is speculated that severity and frequency of both strong monsoon (SM) and weak monsoon (WM) might increase noticeably in future climate. Substantial changes in the daily variability of {\{}ISM{\}} are also projected, which are largely associated with the increase in heavy rainfall events and decrease in both low rain-rate and number of wet days during future monsoon. On the subseasonal scale, the model projections depict considerable amplification of higher frequency (below 30{\&}{\#}xa0;day mode) components; although the dominant northward propagating 30{\^{a}}€“70{\&}{\#}xa0;day mode of monsoon intraseasonal oscillations may not change appreciably in a warmer climate. It is speculated that the enhanced high frequency mode of monsoon {\{}ISOs{\}} due to increased {\{}GHG{\}} induced warming may notably modulate the {\{}ISM{\}} rainfall in future climate. Both extreme wet and dry episodes are likely to intensify and regionally extend in future climate with enhanced propensity of short active and long break spells. The {\{}SM{\}} (WM) could also be more wet (dry) in future due to the increment in longer active (break) spells. However, future changes in the spatial pattern during active/break phase of {\{}SM{\}} and {\{}WM{\}} are geographically inconsistent among the models. The results point out the growing climate-related vulnerability over Indian subcontinent, and further suggest the requisite of profound adaptation measures and better policy making in future.},
author = {Sharmila, S and Joseph, S and Sahai, A K and Abhilash, S and Chattopadhyay, R},
doi = {10.1016/j.gloplacha.2014.11.004},
issn = {0921-8181},
journal = {Global and Planetary Change},
keywords = {{\&}{\#}xa0;monsoon variability},
pages = {62--78},
title = {{Future projection of Indian summer monsoon variability under climate change scenario: An assessment from CMIP5 climate models}},
url = {http://www.sciencedirect.com/science/article/pii/S0921818114002239},
volume = {124},
year = {2015}
}
@article{Easterling2000,
author = {Easterling, David R and Meehl, Gerald A and Parmesan, Camille and Changnon, Stanley A and Karl, Thomas R and Mearns, Linda O},
title = {{Climate Extremes: Observations, Modeling, and Impacts}}
}
@misc{Frost2015,
author = {{Frost {\&} Sullivan}},
title = {{A Multidimensional Coverage of Water Consumption and Expenditure}},
url = {http://www.frost.com/prod/servlet/cpo/53302520},
urldate = {2015-09-28},
year = {2015}
}
@article{Oerlemans1997,
author = {Oerlemans, J},
journal = {Journal of glaciology},
pages = {382--389},
title = {{A flowline model for Nigardsbreen, Norway: projection of future glacier length based on dynamic calibration with the historic record}},
type = {Unpublished},
url = {http://dspace.library.uu.nl/handle/1874/22126},
volume = {24},
year = {1997}
}
@article{McMahon2007,
abstract = {This is the first of three related papers that summarizes streamflow characteristics of a set of 1221 global rivers. The rivers are well distributed world-wide, are un-impacted by upstream reservoirs or diversions for the period of data collection and have at least 10 years of continuous monthly and annual streamflow data. The following key features of annual flows are examined: mean, variability and skewness, distribution type (Gamma or Lognormal), flow percentiles and dependence. High and low frequency persistence is examined through the Empirical Mode Decomposition technique. Low flow run length, magnitude and severity are also explored, where severity is based on Extended Deficit Analysis. It has been observed elsewhere that there are large differences in hydrologic characteristics between Australia and southern Africa in contrast to the rest of the world. This issue is tested further in this paper. The range of analyses and results presented herein also form a suite of empirical evidence that future unified theories of hydrology at the catchment scale must be able to adequately describe.},
author = {McMahon, Thomas A. and Vogel, Richard M. and Peel, Murray C. and Pegram, Geoffrey G.S.},
doi = {10.1016/j.jhydrol.2007.09.002},
issn = {00221694},
journal = {Journal of Hydrology},
keywords = {Global hydrology,Global rivers,Global streamflow characteristics,Global streamflow data},
month = {dec},
number = {3-4},
pages = {243--259},
title = {{Global streamflows – Part 1: Characteristics of annual streamflows}},
url = {http://www.sciencedirect.com/science/article/pii/S0022169407004842},
volume = {347},
year = {2007}
}
@article{Castillo2003,
author = {Castillo, V M and G{\'{o}}mez-Plaza, A and Mart$\backslash$'inez-Mena, M},
doi = {10.1016/S0022-1694(03)00264-6},
journal = {Journal of Hydrology},
number = {1},
pages = {114--130},
publisher = {Elsevier},
title = {{The role of antecedent soil water content in the runoff response of semiarid catchments: a simulation approach}},
url = {http://www.sciencedirect.com/science/article/pii/S0022169403002646},
volume = {284},
year = {2003}
}
@article{Morcrette1986,
author = {Morcrette, J J and Smith, L and Fouquart, Y},
journal = {Beitraege zur Physik der Atmosphaere},
keywords = {Atmospheric Models,Broadband,Cloud Cover,Cooling,Long Wave Radiation,Pressure Dependence,Radiation Absorption,Radiative Transfer,Temperature Dependence},
pages = {455--469},
title = {{Pressure and temperature dependence of the absorption in longwave radiation parameterizations}},
url = {http://adsabs.harvard.edu/abs/1986BePhA..59..455M},
volume = {59},
year = {1986}
}
@article{Xu2013,
abstract = {Summary Hydrological models are important tools for flood forecasting and for the assessment of water resources under current and changing climate. However, the accuracy of hydrological models is limited by many factors, the most important of which, is perhaps the errors in the input data. The influence of the precipitation gauge density and network distribution on the modelling results is still a challenging topic in hydrology studies. One of the reasons for the limited study of this important issue is that it needs a catchment with sufficient size, wide diversity of topography and climate, and dense rain gauges with long and good quality data. In this study, a famous and widely used hydrological model, the Xinanjiang Model, was applied in Xiangjiang River basin to examine the influence of rain gauge density and distribution on the performance of the model in simulating the stream flow. The Xiangjiang River basin, one of the most important economic belts in Hunan Province, China and the primary inflow basin of Dongting Lake – China's second largest freshwater lake, has dense rain gauge network with long and high quality data. To perform the study, firstly, the mean areal rainfall estimated by different rain gauge densities using various statistical indices as evaluation criteria was analysed. Secondly, the influence of different rain gauge density and distribution on the model performance was rigorously evaluated. The results show that the error range of the indices in analysing mean areal rainfall and simulated runoff narrowed gradually with increasing number of rain gauges up to some threshold, and beyond which the model performance did not show considerable improvements. The methodology and results of this study will provide useful guidelines and valuable reference for studying rainfall influence in hydrological modelling.},
author = {Xu, Hongliang and Xu, C.-Y. and Chen, Hua and Zhang, Zengxin and Li, Lu},
doi = {10.1016/j.jhydrol.2013.09.004},
issn = {0022-1694},
journal = {Journal of Hydrology},
keywords = {Xinanjiang Model},
pages = {1--12},
title = {{Assessing the influence of rain gauge density and distribution on hydrological model performance in a humid region of China}},
url = {http://www.sciencedirect.com/science/article/pii/S0022169413006495},
volume = {505},
year = {2013}
}
@techreport{Dyrrdal2009a,
author = {Dyrrdal, Anita Verpe and Vikhamar-Schuler, Dagrun},
title = {{Analysis of long-term snow series at selected stations in Norway}},
url = {http://met.no/Forskning/Publikasjoner/MET{\_}report/2009/filestore/NorClim{\_}snowrep{\_}dvs.pdf},
year = {2009}
}
@article{Thirel2014,
author = {Thirel, G and Andr{\'{o}}assian, V and Perrin, C and Audouy, J N and Berthet, L and Edwards, P and Folton, N and Furusho, C and Kuentz, A and Lerat, J and Lindstr{\"{o}}m, G and Martin, E and Mathevet, T and Merz, R and Parajka, J and Ruelland, D and Vaze, J},
doi = {10.1080/02626667.2014.967248},
journal = {Hydrological Sciences Journal},
title = {{Hydrology under change: an evaluation protocol to investigate how hydrological models deal with changing catchments}},
url = {http://dx.doi.org/10.1080/02626667.2014.967248},
year = {2014}
}
@article{Lorup1998,
author = {L{\o}rup, Jens Kristian and Refsgaard, Jens Christian and Mazvimavi, Dominic},
doi = {10.1016/S0168-1176(97)00311-9},
issn = {0022-1694},
journal = {Journal of Hydrology},
keywords = {Land use change},
number = {3-4},
pages = {147--163},
title = {{Assessing the effect of land use change on catchment runoff by combined use of statistical tests and hydrological modelling: Case studies from Zimbabwe}},
url = {http://www.sciencedirect.com/science/article/pii/S0168117697003119},
volume = {205},
year = {1998}
}
@article{Mann1945,
author = {Mann, Henry B},
journal = {Econometrica: Journal of the Econometric Society},
number = {3},
pages = {245--259},
publisher = {JSTOR},
title = {{Nonparametric tests against trend}},
url = {http://www.jstor.org/discover/1907187?sid=21105575022843{\&}uid=70{\&}uid=2134{\&}uid=3738744{\&}uid=4{\&}uid=2},
volume = {13},
year = {1945}
}
@article{Zhang1997,
annote = {parameter interdependence of HBV model, calibration for subperiods for overall performance, which usually focus on high discharge.},
author = {Zhang, Xingnan and Lindstr{\"{o}}m, G{\"{o}}ran},
doi = {10.1002/(SICI)1099-1085(19971015)11:12<1671::AID-HYP497>3.0.CO;2-G},
issn = {1099-1085},
journal = {Hydrological Processes},
keywords = {HBV model,automatic calibration,objective functions,parameter sets},
number = {12},
pages = {1671--1682},
publisher = {John Wiley {\&} Sons, Ltd},
title = {{Development of an automatic calibration scheme for the HBV hydrological model}},
url = {http://dx.doi.org/10.1002/(SICI)1099-1085(19971015)11:12{\textless}1671::AID-HYP497{\textgreater}3.0.CO;2-G},
volume = {11},
year = {1997}
}
@article{Kaab2012,
annote = {03-08 glacier -0.38 in east Nepel and Buhutan},
author = {K{\"{a}}{\"{a}}b, Andreas and Berthier, Etienne and Nuth, Christopher and Gardelle, Julie and Arnaud, Yves},
doi = {10.1038/nature11324},
journal = {Nature},
number = {7412},
pages = {495--498},
publisher = {Nature Publishing Group},
title = {{Contrasting patterns of early twenty-first-century glacier mass change in the Himalayas}},
url = {http://www.nature.com/nature/journal/v488/n7412/full/nature11324.html{\#}close},
volume = {488},
year = {2012}
}
@article{Andreassen2005,
abstract = {The importance of glaciers in mainland Norway for runoff is reflected in the extensive glacier measurement record. Mass balance has been measured for 42 glaciers. Length (or front-position) records exist for about 60 glaciers, and nearly half of these are presently measured. The mass-balance and front-position data have been analyzed with respect to spatial and temporal variations. The maritime glaciers with a large annual mass turnover have had a mass surplus between 1962 and 2000. In contrast, the continental glaciers with smaller summer and winter balances had a mass deficit over the same period. Since 2001 all monitored glaciers have had a marked mass deficit. The Norwegian glaciers have all retreated during the 20th century. However, both local and regional variations have been observed. Advances were recorded around 1910, around 1930, in the second half of the 1970s and around 1990. This last advance stopped in most glaciers at the turn of the century.},
author = {Andreassen, Liss M and Elveh{\o}y, Hallgeir and Kj{\o}llmoen, Bjarne and Engeset, Rune V and Haakensen, Nils},
doi = {10.3189/172756405781812826},
journal = {Annals of Glaciology},
number = {1},
pages = {317--325},
title = {{Glacier mass-balance and length variation in Norway}},
url = {http://www.ingentaconnect.com/content/igsoc/agl/2005/00000042/00000001/art00047},
volume = {42},
year = {2005}
}
@article{Lin2015,
abstract = {AbstractThe objective of this study is to develop a framework for dynamically downscaling spaceborne precipitation products using the Weather Research and Forecasting (WRF) Model with four-dimensional variational data assimilation (4D-Var). Numerical experiments have been conducted to 1) understand the sensitivity of precipitation downscaling through point-scale precipitation data assimilation and 2) investigate the impact of seasonality and associated changes in precipitation-generating mechanisms on the quality of spatiotemporal downscaling of precipitation. The point-scale experiment suggests that assimilating precipitation can significantly affect the precipitation analysis, forecast, and downscaling. Because of occasional overestimation or underestimation of small-scale summertime precipitation extremes, the numerical experiments presented here demonstrate that the wintertime assimilation produces downscaled precipitation estimates that are in closer agreement with the reference National Centers for Environmental Prediction stage IV dataset than similar summertime experiments. This study concludes that the WRF 4D-Var system is able to effectively downscale a 6-h precipitation product with a spatial resolution of 20 km to hourly precipitation with a spatial resolution of less than 10 km in grid spacing—relevant to finescale hydrologic applications for the era of the Global Precipitation Measurement mission.},
author = {Lin, Liao-Fan and Ebtehaj, Ardeshir M and Bras, Rafael L and Flores, Alejandro N and Wang, Jingfeng},
doi = {10.1175/JHM-D-14-0042.1},
journal = {Journal of Hydrometeorology},
number = {2},
pages = {811--829},
title = {{Dynamical Precipitation Downscaling for Hydrologic Applications Using WRF 4D-Var Data Assimilation: Implications for GPM Era}},
url = {http://dx.doi.org/10.1175/JHM-D-14-0042.1},
volume = {16},
year = {2015}
}
@article{Hagemann2013,
annote = {multi GCM and hydrological model simulation for climate change and water resources and large uncertainties; estimation of water environment requirement},
author = {Hagemann, S and Chen, C and Clark, D B and Folwell, S and Gosling, S N and Haddeland, I and Hanasaki, N and Heinke, J and Ludwig, F and Voss, F and Wiltshire, A J},
doi = {10.5194/esd-4-129-2013},
journal = {Earth System Dynamics},
number = {1},
pages = {129--144},
title = {{Climate change impact on available water resources obtained using multiple global climate and hydrology models}},
url = {http://www.earth-syst-dynam.net/4/129/2013/},
volume = {4},
year = {2013}
}
@article{Obled1994305,
author = {Obled, Ch. and Wendling, J and Beven, K},
doi = {http://dx.doi.org/10.1016/0022-1694(94)90263-1},
issn = {0022-1694},
journal = {Journal of Hydrology},
number = {1{\^{a}}€“4},
pages = {305--333},
title = {{The sensitivity of hydrological models to spatial rainfall patterns: an evaluation using observed data}},
url = {http://www.sciencedirect.com/science/article/pii/0022169494902631},
volume = {159},
year = {1994}
}
@article{Jiang2007,
abstract = {Summary Large differences in future climatic scenarios found when different global circulation models (GCMs) are employed have been extensively discussed in the scientific literature. However, differences in hydrological responses to the climatic scenarios resulting from the use of different hydrological models have received much less attention. Therefore, comparing and quantifying such differences are of particular importance for the water resources management of a catchment, a region, a continent, or even the globe. This study investigates potential impacts of human-induced climate change on the water availability in the Dongjiang basin, South China, using six monthly water balance models, namely the Thornthwaite–Mather (TM), Vrije Universitet Brussel (VUB), Xinanjiang (XAJ), Guo (GM), WatBal (WM), and Schaake (SM) models. The study utilizes 29-year long records of monthly streamflow and climate in the Dongjiang basin. The capability of the six models in simulating the present climate water balance components is first evaluated and the results of the models in simulating the impact of the postulated climate change are then analyzed and compared. The results of analysis reveal that (1) all six conceptual models have similar capabilities in reproducing historical water balance components; (2) greater differences in the model results occur when the models are used to simulate the hydrological impact of the postulated climate changes; and (3) a model without a threshold in soil moisture simulation results in greater changes in model-predicted soil moisture with respect to alternative climates than the models with a threshold soil moisture. The study provides insights into the plausible changes in basin hydrology due to climate change, that is, it shows that there can be significant implications for the investigation of response strategies for water supply and flood control due to climate change.},
annote = {same performance in observed pattern and large difference in projected scenario},
author = {Jiang, Tao and Chen, Yongqin David and Xu, C.-Y. and Chen, Xiaohong and Chen, Xi and Singh, V},
doi = {10.1016/j.jhydrol.2007.01.010},
issn = {0022-1694},
journal = {Journal of Hydrology},
keywords = {Climate change},
number = {3–4},
pages = {316--333},
title = {{Comparison of hydrological impacts of climate change simulated by six hydrological models in the Dongjiang Basin, South China}},
url = {http://www.sciencedirect.com/science/article/pii/S0022169407000200},
volume = {336},
year = {2007}
}
@article{Prasanna2014,
abstract = {The India Meteorological Department (IMD) gridded rainfall dataset, the 47 Bangladesh gauge rainfall observations and the Tropical Rainfall Measuring Mission (TRMM) 3B42V6 satellite data are used in the present analysis. The nearest neighbour interpolation scheme is used, wherein the interpolated values are computed from a weighted sum of observations. The Bangladesh daily gauge measured rainfall is interpolated into regular grids of 0.5° × 0.5° resolution every day from January 1988 to December 2007 and appended with the daily gridded dataset of the IMD over the Indian region. A similar resolution dataset of 0.5° × 0.5° for the TRMM-3B42V6 data from January 1998 to December 2007 is created from the original data of 0.25° × 0.25° resolution. To produce a merged rainfall product, all the gridded datasets are merged. The merging of datasets is done in such a way as to include the highest rainfall at each grid point from the three products. Based on the three available sets of daily observations (IMD dataset (1° × 1°), TRMM-3B42 (0.25° × 0.25°) and 46 daily station observations over Bangladesh), a dataset of 0.5° × 0.5° resolution on a daily scale is generated. The focus of this study is to compare the TRMM-3B42V6 rainfall data over the Ganga, Brahmaputra and Meghna (GBM) domain with observed point gauge data, and assess the possibility of using them for application in real time flood forecasting as well as to serve as a comparison tool for the baseline simulation of high resolution atmospheric models aimed at flood forecasting and climate change projections. Copyright {\textcopyright} 2012 Royal Meteorological Society},
author = {Prasanna, Venkatraman and Subere, Juvy and Das, Dwijendra K and Govindarajan, Srinivasan and Yasunari, Tetsuzo},
doi = {10.1002/met.1327},
issn = {1469-8080},
journal = {Meteorological Applications},
keywords = {Bangladesh floods,Prasanna2014,TRMM 3B42V6,gauge rainfall dataset,gridded rainfall dataset},
mendeley-tags = {Prasanna2014},
number = {2},
pages = {278--293},
publisher = {John Wiley {\&} Sons, Ltd},
title = {{Development of daily gridded rainfall dataset over the Ganga, Brahmaputra and Meghna river basins}},
url = {http://dx.doi.org/10.1002/met.1327},
volume = {21},
year = {2014}
}
@misc{Doherty2005,
author = {Doherty, John},
edition = {5},
institution = {Watermark Numerical Computing},
number = {5},
title = {{PEST Model-Independent Parameter Estimation User Manual}},
url = {http://www.pesthomepage.org/Downloads.php},
year = {2005}
}
@misc{Petit2001,
author = {Petit, Jean Robert and LGGE-CNRS},
title = {{Vostok Ice Core Data for 420,000 Years}},
url = {ftp://ftp.ncdc.noaa.gov/pub/data/paleo/icecore/antarctica/vostok/deutnat.txt},
year = {2001}
}
@article{Yang2013,
abstract = {Since the launch in March 2002, the Gravity Recovery and Climate Experiment (GRACE) satellite mission has provided us with a new method to estimate terrestrial water storage (TWS) variations by measuring earth gravity change with unprecedented accuracy. Thus far, a number of standardized GRACE-born TWS products are published by different international research teams. However, no characterization of spatio-temporal patterns for different GRACE hydrology products from the global perspective could be found. It is still a big challenge for the science community to identify the reliable global measurement of TWS anomalies due to our limited knowledge on the true value. Hence, it is urgently necessary to evaluate the uncertainty for various global estimates of the GRACE-born TWS changes by a number of international research organizations. Toward this end, this article presents an in-depth analysis for various GRACE-born and GLDAS-based estimates for changes of global terrestrial water storage. The work characterizes the inter-annual and intra-annual variability, probability density variations, and spatial patterns among different GRACE-born TWS estimates over six major continents, and compares them with results from GLDAS simulations. The underlying causes of inconsistency between GRACE- and GLDAS-born TWS estimates are thoroughly analyzed with an aim to improve our current knowledge in monitoring global TWS change. With a comprehensive consideration of the advantages and disadvantages among GRACE- and GLDAS-born TWS anomalies, a summary is thereafter recommended as a rapid reference for scientists, end-users, and policy-makers in the practices of global TWS change research. To our best knowledge, this work is the first attempt to characterize difference and uncertainty among various GRACE-born terrestrial water storage changes over the major continents estimated by a number of international research organizations. The results can provide beneficial reference to usage of different GRACE hydrology products to study TWS changes in different regions of the world.},
author = {Yang, Tao and Wang, Chao and Yu, Zhongbo and Xu, Feng},
doi = {10.1016/j.gloplacha.2013.07.005},
issn = {0921-8181},
journal = {Global and Planetary Change},
keywords = {GRACE-born hydrology products},
pages = {30--37},
title = {{Characterization of spatio-temporal patterns for various GRACE- and GLDAS-born estimates for changes of global terrestrial water storage}},
url = {http://www.sciencedirect.com/science/article/pii/S0921818113001653},
volume = {109},
year = {2013}
}
@article{dyrrdal2012changes,
author = {Dyrrdal, Anita Verpe and Isaksen, Ketil and Hygen, Hans Olav and Meyer, Nele Kristin},
file = {:C$\backslash$:/Users/holi/AppData/Local/Mendeley Ltd./Mendeley Desktop/Downloaded/Dyrrdal et al. - 2012 - Changes in meteorological variables that can trigger natural hazards in Norway.pdf:pdf},
journal = {Climate Research},
number = {2},
pages = {153--165},
title = {{Changes in meteorological variables that can trigger natural hazards in Norway}},
volume = {55},
year = {2012}
}
@article{Bronstert1999,
author = {Bronstert, A and B{\'{a}}rdossy, A},
doi = {10.5194/hess-3-505-1999},
journal = {Hydrology and Earth System Sciences},
number = {4},
pages = {505--516},
title = {{The role of spatial variability of soil moisture for modelling surface runoff generation at the small catchment scale}},
url = {http://www.hydrol-earth-syst-sci.net/3/505/1999/},
volume = {3},
year = {1999}
}
@article{Andres-Domenech2014,
annote = {good idea about catchment effects in climate change study},
author = {Andr{\'{e}}s-Dom{\'{e}}nech, I and Garc$\backslash$'ia-Bartual, R and Montanari, A and Marco, J B},
doi = {10.5194/hessd-11-10411-2014},
journal = {Hydrology and Earth System Sciences Discussions},
number = {9},
pages = {10411--10430},
title = {{Climate and hydrological variability: the catchment filtering role}},
url = {http://www.hydrol-earth-syst-sci-discuss.net/11/10411/2014/},
volume = {11},
year = {2014}
}
@article{Katragkou2015,
author = {Katragkou, E and Garc\'{i}a-D\'{i}ez, M and Vautard, R and Sobolowski, S and Zanis, P and Alexandri, G and Cardoso, R M and Colette, A and Fernandez, J and Gobiet, A and Goergen, K and Karacostas, T and Knist, S and Mayer, S and Soares, P M M and Pytharoulis, I and Tegoulias, I and Tsikerdekis, A and Jacob, D},
doi = {10.5194/gmd-8-603-2015},
journal = {Geoscientific Model Development},
number = {3},
pages = {603--618},
title = {{Regional climate hindcast simulations within EURO-CORDEX: evaluation of a WRF multi-physics ensemble}},
url = {http://www.geosci-model-dev.net/8/603/2015/},
volume = {8},
year = {2015}
}
@article{Sivapalan2003,
author = {Sivapalan, M and Takeuchi, K and Franks, S W and Gupta, V K and Karambiri, H and Lakshmi, V and Liang, X and McDonnell, J J and Mendiondo, E M and O'Connell, P E and Oki, T and Pomeroy, J W and Schertzer, D and Uhlenbrook, S and Zehe, E},
doi = {10.1623/hysj.48.6.857.51421},
journal = {Hydrological Sciences Journal},
number = {6},
pages = {857--880},
title = {{IAHS Decade on Predictions in Ungauged Basins (PUB), 2003-2012: Shaping an exciting future for the hydrological sciences}},
url = {http://dx.doi.org/10.1623/hysj.48.6.857.51421},
volume = {48},
year = {2003}
}
@article{Letsinger200748,
abstract = {Summary A distributed energy-balance model was developed for simulating snowpack evolution and melt in rugged terrain. The model, which was applied to a 43-km2 watershed in the Tobacco Root Mountains, Montana, USA, used measured ambient data from nearby weather stations to drive energy-balance calculations and to constrain the model of Liston and Sturm [Liston, G.E., Sturm, M., 1998. A snow-transport model for complex terrain. Journal of Glaciology 44 (148), 498-516] for calculating the initial snowpack thickness. Simulated initial snow-water equivalent ranged between 1{\&}{\#}xa0;cm and 385{\&}{\#}xa0;cm w.e. (water equivalent) with high values concentrated on east-facing slopes below tall summits. An interpreted satellite image of the snowcover distribution on May 6, 1998, closely matched the simulated distribution with the greatest discrepancy occurring in the floor of the main trunk valley. Model simulations indicated that snowmelt commenced early in the melt season, but rapid meltout of snow cover did not occur until after the average energy balance of the entire watershed became positive about 45 days into the melt season. Meltout was fastest in the lower part of the watershed where warmer temperatures and tree cover enhanced the energy income of the underlying snow. An interpreted satellite image of the snowcover distribution on July 9, 1998 compared favorably with the simulated distribution, and melt curves for modeled canopy-covered cells mimicked the trends measured at nearby snow pillow stations. By the end of the simulation period (August 3), 28{\%} of the watershed remained snow covered, most of which was concentrated in the highest parts of the watershed where initially thick accumulations had been shaded by surrounding summits. The results of this study provide further demonstration of the critical role that topography plays in the timing and magnitude of snowmelt from high mountain watersheds. },
author = {Letsinger, Sally L and Olyphant, Greg A},
doi = {10.1016/j.jhydrol.2006.12.012},
issn = {0022-1694},
journal = {Journal of Hydrology},
keywords = {Snowmelt},
number = {1-2},
pages = {48--60},
title = {{Distributed energy-balance modeling of snow-cover evolution and melt in rugged terrain: Tobacco Root Mountains, Montana, {\{}USA{\}}}},
url = {http://www.sciencedirect.com/science/article/pii/S0022169406006676},
volume = {336},
year = {2007}
}
@article{Corbari2014,
author = {Corbari, C. and Mancini, M. and Su, Z. and Li, J.},
doi = {10.2166/nh.2013.016},
issn = {0029-1277},
journal = {Hydrology Research},
keywords = {GRACE,evapotranspiration,remote sensing,water balance},
language = {en},
month = {aug},
number = {4-5},
pages = {603--614},
publisher = {IWA Publishing},
title = {{Evapotranspiration estimate from water balance closure using satellite data for the Upper Yangtze River basin}},
url = {http://www.iwaponline.com/nh/045/nh0450603.htm},
volume = {45},
year = {2014}
}
@article{Tiedtke1989,
author = {Tiedtke, MICHAEL},
doi = {10.1175/1520-0493(1989)117<1779:ACMFSF>2.0.CO;2},
journal = {Monthly Weather Review},
number = {8},
pages = {1779--1800},
title = {{A comprehensive mass flux scheme for cumulus parameterization in large-scale models}},
url = {http://journals.ametsoc.org/doi/abs/10.1175/1520-0493{\%}281989{\%}29117{\%}3C1779{\%}3AACMFSF{\%}3E2.0.CO{\%}3B2},
volume = {117},
year = {1989}
}
@article{Yeh1998,
author = {Yeh, Pat Jen-Feng and Irizarry, Michelle and Eltahir, Elfatih A B},
doi = {10.1029/98JD01721},
issn = {2156-2202},
journal = {Journal of Geophysical Research: Atmospheres},
number = {D16},
pages = {19823--19837},
title = {{Hydroclimatology of Illinois: A comparison of monthly evaporation estimates based on atmospheric water balance and soil water balance}},
url = {http://dx.doi.org/10.1029/98JD01721},
volume = {103},
year = {1998}
}
@article{Singh1995,
author = {Singh, V. P.},
isbn = {0-918334-91-8},
keywords = {computer techniques,hydrology,models,watersheds},
language = {English},
publisher = {Water Resources Publications},
title = {{Computer models of watershed hydrology.}},
url = {http://www.cabdirect.org/abstracts/19961904762.html;jsessionid=60C8E7316352D0DB471A3DE9973812B9},
year = {1995}
}
@article{Li2013,
abstract = {This paper provides a comparison of two widely used global precipitation datasets in Southern Africa: Tropical Rainfall Measuring Mission (TRMM) and Water and Global Change (WATCH) Forcing Data (WFD). We also evaluate the performance of the water and snow balance modelling system (WASMOD-D) in a water balance simulation of 22 gauged basins over the southern Africa region. Water balance for southern Africa was simulated using the two global datasets as input with regionalized model parameter values. The results reveal that the special variation patterns of mean annual precipitation from TRMM and WFD data sets and temporal changing trend are similar in southern Africa. However, they are quite different in terms of probability distributions. Simulation of WASMOD-D based on two datasets in southern Africa results in model performances of above 0.5 for Nash–Sutcliffe (NS) values, below 10{\%} for volume error (VE) values and a good reproduction of the observed flow duration curves for the majority of the basins. Finally, WFD data which has been bias corrected was observed to outperform TRMM data in Southern Africa. The approaches and results described in this study contribute to the limited literature on regional hydrological modelling in the data-scarce region of southern Africa.},
annote = {ungauged catchments},
author = {Li, Lu and Ngongondo, Cosmo S and Xu, C.-Y. and Gong, Lebing},
doi = {10.2166/nh.2012.175},
journal = {Hydrology Research},
number = {5},
pages = {770--788},
title = {{Comparison of the global TRMM and WFD precipitation datasets in driving a large-scale hydrological model in Southern Africa}},
url = {http://www.iwaponline.com/nh/up/nh2012175.htm},
volume = {44},
year = {2013}
}
@article{Hock2003,
abstract = {Temperature index or degree-day models rest upon a claimed relationship between snow or ice melt and air temperature usually expressed in the form of positive temperatures. Since air temperature generally is the most readily available data, such models have been the most widely used method of ice and snow melt computations for many purposes, such as hydrological modelling, ice dynamic modelling or climate sensitivity studies. Despite their simplicity, temperature-index models have proven to be powerful tools for melt modelling, often on a catchment scale outperforming energy balance models. However, two shortcomings are evident: (1) although working well over long time periods their accuracy decreases with increasing temporal resolution; (2) spatial variability cannot be modelled accurately as melt rates may vary substantially due to topographic effects such as shading, slope and aspect angles. These effects are particularly crucial in mountain areas. This paper provides an overview of temperature-index methods, including glacier environments, and discusses recent advances on distributed approaches attempting to account for topographic effects in complex terrain, while retaining scarcity of data input. In the light of an increasing demand for melt estimates with high spatial and temporal resolution, such approaches need further refinement and development.},
author = {Hock, Regine},
doi = {10.1016/S0022-1694(03)00257-9},
issn = {00221694},
journal = {Journal of Hydrology},
keywords = {Degree-day factor,Glacier mass balance,Melt modelling,Temperature index models},
month = {nov},
number = {1-4},
pages = {104--115},
title = {{Temperature index melt modelling in mountain areas}},
url = {http://www.sciencedirect.com/science/article/pii/S0022169403002579},
volume = {282},
year = {2003}
}
@article{quick1977ubc,
author = {Quick, M C and Pipes, A},
journal = {Hydrological Sciences Journal},
number = {1},
pages = {153--161},
publisher = {Taylor {\&} Francis},
title = {{UBC WATERSHED MODEL/Le mod{\{}{\`{e}}{\}}le du bassin versant UCB}},
volume = {22},
year = {1977}
}
@article{Gong2009,
annote = {souce-to-sink runoff routing},
author = {Gong, L and Wid{\'{e}}n-Nilsson, E and Halldin, S and Xu, C.-Y.},
doi = {10.1016/j.jhydrol.2009.02.007},
issn = {0022-1694},
journal = {Journal of Hydrology},
keywords = {Large-scale},
number = {1-4},
pages = {237--250},
title = {{Large-scale runoff routing with an aggregated network-response function}},
url = {http://www.sciencedirect.com/science/article/pii/S0022169409000857},
volume = {368},
year = {2009}
}
@article{Hailegeorgis2014,
author = {Hailegeorgis, Teklu T and Alfredsen, Knut},
doi = {10.2166/nh.2014.051},
journal = {Hydrology Research},
publisher = {IWA Publishing},
title = {{Comparative evaluation of performances of different conceptualisations of distributed HBV runoff response routines for prediction of hourly streamflow in boreal mountainous catchments}},
url = {http://www.iwaponline.com/nh/up/nh2014051.htm},
volume = {in press},
year = {2015}
}
@article{Mandelbrot1968,
annote = {hydrology cycle ,50-100},
author = {Mandelbrot, Benoit B and Wallis, James R},
doi = {10.1029/WR004i005p00909},
issn = {1944-7973},
journal = {Water Resources Research},
keywords = {Statistics,synthesis,time series},
number = {5},
pages = {909--918},
title = {{Noah, Joseph, and Operational Hydrology}},
url = {http://dx.doi.org/10.1029/WR004i005p00909},
volume = {4},
year = {1968}
}
@article{Sorteberg2001,
annote = {data quality of Norway snow pillow; half on precipitation falls as snow; the importance of snow in Norway in terms if hydro powder, flood and avalanches; HBV simulate snow storgae well and analysis; bad snow melting; seee graph foe specific information},
author = {Sorteberg, H K and Engeset, R V and Udnas, H C},
doi = {10.1016/S1464-1917(01)95016-0},
issn = {1464-1917},
journal = {Physics and Chemistry of the Earth, Part C: Solar, Terrestrial {\{}{\&}{\}} Planetary Science},
number = {10-12},
pages = {723--729},
title = {{A national network for snow monitoring in Norway: Snow pillow verification using observations and models}},
url = {http://www.sciencedirect.com/science/article/pii/S1464191701950160},
volume = {26},
year = {2001}
}
@article{Lindstrom1997272,
abstract = {A comprehensive re-evaluation of the {\{}HBV{\}} hydrological model has been carried out. The objectives were to improve its potential for making use of spatially distributed data, to make it more physically sound and to improve the model performance. The new version, HBV-96, uses subbasin division with a typical resolution of 40 km z, although any resolution can be used. In addition, each subbasin is divided into elevation bands, vegetation and snow classes. Automatic weighting of precipitation and temperature stations was introduced and a new automatic calibration scheme was developed. The modifications led to significant improvements in model performance. In seven test basins the average value of the efficiency criterion {\{}R2{\}} increased from 86 to 89{\%}, with improvements in both the calibration and verification periods.},
annote = {development of HBV,A comprehensive re-evaluation of the HBV hydrological model has been carried out. The objectives were to improve its potential for making use of spatially distributed data, to make it more physically sound and to improve the model performance. The new version, HBV-96, uses subbasin division with a typical resolution of 40 km z, although any resolution can be used. In addition, each subbasin is divided into elevation bands, vegetation and snow classes. Automatic weighting of precipitation and temperature stations was introduced and a new automatic calibration scheme was developed. The modifications led to significant improvements in model performance. In seven test basins the average value of the efficiency criterion R2 increased from 86 to 89{\%}, with improvements in both the calibration and verification periods.},
author = {Lindstr{\"{o}}m, G{\"{o}}ran and Johansson, Barbro and Persson, Magnus and Gardelin, Marie and Bergstr{\"{o}}m, Sten},
doi = {10.1016/S0022-1694(97)00041-3},
issn = {0022-1694},
journal = {Journal of Hydrology},
keywords = {HBV-96 Hydrological model},
number = {1-4},
pages = {272--288},
title = {{Development and test of the distributed HBV-96 hydrological model}},
url = {http://www.sciencedirect.com/science/article/pii/S0022169497000413},
volume = {201},
year = {1997}
}
@article{Carey01072007,
abstract = {In recent decades, glaciers have become both a key icon for global warming and a type of endangered species. But to understand why glaciers are so inexorably tied to global warming and why people lament the loss of ice, it is necessary to look beyond climate science and glacier melting—to turn additionally to culture, history, and power relations. Probing historical views of glaciers demonstrates that the recent emergence of an "endangered glacier" narrative stemmed from various glacier perspectives dating to the eighteenth and nineteenth centuries: glaciers as menace, scientific laboratories, sublime scenery, recreation sites, places to explore and conquer, and symbols of wilderness. By encompassing so many diverse meanings, glacier and global warming discourse can thus offer a platform to implement historical ideologies about nature, science, imperialism, race, recreation, wilderness, and global power dynamics.},
author = {Carey, Mark},
doi = {10.1093/envhis/12.3.497},
journal = {Environmental History},
number = {3},
pages = {497--527},
title = {{The History of Ice: How Glaciers Became an Endangered Species}},
url = {http://envhis.oxfordjournals.org/content/12/3/497.abstract},
volume = {12},
year = {2007}
}
@article{Sorg2014,
abstract = {Despite the fact that the fast-growing population of Central Asia strongly depends on glacial melt water for fresh water supply, irrigation and hydropower production, the impact of glacier shrinkage on water availability remains poorly understood. With an annual area loss of 0.36 to 0.76{\%}, glaciers are retreating particularly fast in the northern Tien Shan, thus causing concern about future water security in the densely populated regions of Bishkek and Almaty. Here, we use exceptionally long in-situ data series to run and calibrate a distributed glacio-hydrological model, which we then force with downscaled data from phase five of the Climate Model Intercomparison Project CMIP5. We observe that even in the most glacier-friendly scenario, glaciers will lose up to two thirds ({\^{a}}ˆ'60{\%}) of their 1955 extent by the end of the 21st century. The range of climate scenarios translates into different changes in overall water availability, from peak water being reached in the 2020s over a gradual decrease to status quo until the end of the 21st century. The days of plenty, however, will not last much longer, as summer runoff is projected to decrease, independent of scenario uncertainty. These results highlight the need for immediate planning of mitigation measures in the agricultural and energy sectors to assure long-term water security in the densely populated forelands of the Tien Shan.},
author = {Sorg, Annina and Huss, Matthias and Rohrer, Mario and Stoffel, Markus},
doi = {10.1088/1748-9326/9/10/104018},
journal = {Environmental Research Letters},
number = {10},
pages = {104018},
title = {{The days of plenty might soon be over in glacierized Central Asian catchments}},
url = {http://iopscience.iop.org/1748-9326/9/10/104018},
volume = {9},
year = {2014}
}
@article{Beven2001,
author = {Beven, Keith and Freer, Jim},
doi = {10.1016/S0022-1694(01)00421-8},
issn = {0022-1694},
journal = {Journal of Hydrology},
keywords = {TOPMODEL},
number = {1-4},
pages = {11--29},
title = {{Equifinality, data assimilation, and uncertainty estimation in mechanistic modelling of complex environmental systems using the GLUE methodology}},
url = {http://www.sciencedirect.com/science/article/pii/S0022169401004218},
volume = {249},
year = {2001}
}
@article{Zhang1996,
abstract = {ABSTRACT: There are a large number of conceptual hydrological models available today. It is not easy to immediately identify the similarities and differences between the different models. The Swedish HBV model and the Chinese Xinanjiang model are two examples of conceptual, semi-distributed, rainfall-runoff models. The Xinanjiang model was designed for use in humid and semi-humid regions, with no routine for the snowmelt runoff, whereas the snow routine is an important part of the HBV model in many applications. The model structures of the two models may be described in four routines, compared in this paper. The integral structures of them are similar, but there are some differences, especially in the runoff production routine. The physical significance and physical definitions of some model parameters were analyzed. Both models were tested in two basins. Both models gave similar results, and both models performed well in the application. The similarity of the results obtained by different model structures leads to the following two conclusions. First, more effort should probably be spent on the improvement of input data quality and coverage than on the development of more detailed model structures only. Second, inference about basin behavior and characteristics from the values of calibrated model parameters must be made with great caution.},
author = {Zhang, Xingnan and Lindstr{\"{o}}m, G{\"{o}}ran},
doi = {10.1111/j.1752-1688.1996.tb04067.x},
issn = {1752-1688},
journal = {JAWRA Journal of the American Water Resources Association},
keywords = {HBV model,Xinanjiang model,conceptual models,model comparison},
number = {5},
pages = {985--994},
publisher = {Blackwell Publishing Ltd},
title = {{A COMPARATIVE STUDY OF A SWEDISH AND A CHINESE HYDROLOGICAL MODEL}},
url = {http://dx.doi.org/10.1111/j.1752-1688.1996.tb04067.x},
volume = {32},
year = {1996}
}
@article{Teichmann2013,
abstract = {Global and regional climate model simulations are frequently used for regional climate change assessments and in climate impact modeling studies. To reflect the inherent and methodological uncertainties in climate modeling, the assessment of regional climate change requires ensemble simulations from different global and regional climate model combinations. To interpret the spread of simulated results, it is useful to understand how the climate change signal is modified in the GCM-RCM modelmodelgeneral circulation model-regional climate model (GCM-RCM) chain. This kind of information can also be useful for impact modelers; for the process of experiment design and when interpreting model results. In this study, we investigate how the simulated historical and future climate of the Max-Planck-Institute earth system model (MPI-ESM) is modified by dynamic downscaling with the regional model REMO in different world regions. The historical climate simulations for 1950–2005 are driven by observed anthropogenic forcing. The climate projections are driven by projected anthropogenic forcing according to different Representative Concentration Pathways (RCPs). The global simulations are downscaled with REMO over the Coordinated Regional Climate Downscaling Experiment (CORDEX) domains Africa, Europe, South America and West Asia from 2006–2100. This unique set of simulations allows for climate type specific analysis across multiple world regions and for multi-scenarios. We used a classification of climate types by K{\"{o}}ppen-Trewartha to define evaluation regions with certain climate conditions. A systematic comparison of near-surface temperature and precipitation simulated by the regional and the global model is done. In general, the historical time period is well represented by the GCM and the RCM. Some different biases occur in the RCM compared to the GCM as in the Amazon Basin, northern Africa and the West Asian domain. Both models project similar warming, although somewhat less so by the RCM for certain regions and climate types. A common feature in regions of tropical climate types is that REMO shows dryer climate conditions than forMax Planck Institute for Meteorology-Earth System Model (MPI-ESM) for RCP 4.5 and RCP 8.5, leading to an opposing sign in the climate change signal. With an increase in radiative forcing from RCP 2.6 to RCP 8.5 and towards the end of the 21st century, some of the detected differences between GCM and RCM are more pronounced.},
author = {Teichmann, Claas and Eggert, Bastian and Elizalde, Alberto and Haensler, Andreas and Jacob, Daniela and Kumar, Pankaj and Moseley, Christopher and Pfeifer, Susanne and Rechid, Diana and Remedio, Armelle Reca and Ries, Hinnerk and Petersen, Juliane and Preuschmann, Swantje and Raub, Thomas and Saeed, Fahad and Sieck, Kevin and Weber, Torsten},
doi = {10.3390/atmos4020214},
issn = {2073-4433},
journal = {Atmosphere},
number = {2},
pages = {214--236},
title = {{How Does a Regional Climate Model Modify the Projected Climate Change Signal of the Driving GCM: A Study over Different CORDEX Regions Using REMO}},
url = {http://www.mdpi.com/2073-4433/4/2/214},
volume = {4},
year = {2013}
}
@article{Kain1990,
author = {Kain, John S and Fritsch, J Michael},
doi = {10.1175/1520-0469(1990)047<2784:AODEPM>2.0.CO;2},
journal = {Journal of the Atmospheric Sciences},
number = {23},
pages = {2784--2802},
title = {{A one-dimensional entraining/detraining plume model and its application in convective parameterization}},
url = {http://journals.ametsoc.org/doi/abs/10.1175/1520-0469{\%}281990{\%}29047{\%}3C2784{\%}3AAODEPM{\%}3E2.0.CO{\%}3B2},
volume = {47},
year = {1990}
}
@article{Farinotti2009,
abstract = {Sound knowledge of the ice volume and ice-thickness distribution of a glacier is essential for many glaciological applications. However, direct measurements of ice thickness are laborious, not feasible everywhere and necessarily restricted to a small number of glaciers. In this paper, we present a method to estimate the ice-thickness distribution and the total ice volume of alpine glaciers. This method is based on glacier mass turnover and principles of ice-flow mechanics. The required input data are the glacier surface topography, the glacier outline and a set of borders delineating different 'ice-flow catchments'. Three parameters describe the distribution of the 'apparent mass balance', which is defined as the difference between the glacier surface mass balance and the rate of ice-thickness change, and two parameters define the ice-flow dynamics. The method was developed and validated on four alpine glaciers located in Switzerland, for which the bedrock topography is partially known from radio-echo soundings. The ice thickness along 82 cross-profiles can be reproduced with an average deviation of about 25{\%} between the calculated and the measured ice thickness. The cross-sectional areas differ by less than 20{\%} on average. This shows the potential of the method for estimating the ice-thickness distribution of alpine glaciers without the use of direct measurements.},
author = {Farinotti, Daniel and Huss, Matthias and Bauder, Andreas and Funk, Martin and Truffer, Martin},
doi = {10.3189/002214309788816759},
journal = {Journal of Glaciology},
number = {191},
pages = {422--430},
title = {{A method to estimate the ice volume and ice-thickness distribution of alpine glaciers}},
url = {http://www.ingentaconnect.com/content/igsoc/jog/2009/00000055/00000191/art00004},
volume = {55},
year = {2009}
}
@article{Bauder2007,
abstract = {The evolution of surface topography of glaciers in the Swiss Alps is well documented with high-resolution aerial photographs repeatedly recorded since the 1960s and further back in time with topographic maps including elevation contour lines first surveyed in the mid-19th century. In order to quantify and interpret glacier changes in the Swiss Alps, time series of volume changes over the last 100{\&}{\#}8211;150 years have been collected. The available datasets provide a detailed spatial resolution for the retreat period since the end of the Little Ice Age. The spatial distribution as well as temporal variations of the thickness change were analyzed. A significant ice loss since the end of the 19th century was observed in the ablation area, while the changes in the accumulation area were small. We found moderate negative secular rates until the 1960s, followed by steady to positive rates for about two decades and strong ice loss starting in the 1980s which has lasted until the present. An evaluation of 19 glaciers revealed a total ice volume loss of about 13 km{\textless}sup xmlns={\#}http://pub2web.metastore.ingenta.com/ns/{\#}{\textgreater}3{\textless}/sup{\textgreater} since the 1870s, of which 8.7 km{\textless}sup xmlns={\#}http://pub2web.metastore.ingenta.com/ns/{\#}{\textgreater}3{\textless}/sup{\textgreater} occurred since the 1920s and 3.5 km{\textless}sup xmlns={\#}http://pub2web.metastore.ingenta.com/ns/{\#}{\textgreater}3{\textless}/sup{\textgreater} since 1980. Decadal mean net balance rates for the periods 1920{\&}{\#}8211;60, 1960{\&}{\#}8211;80 and 1980{\&}{\#}8211;present are {\&}{\#}8722;0.29, {\&}{\#}8722;0.03 and {\&}{\#}8722;0.53 m a{\textless}sup xmlns={\#}http://pub2web.metastore.ingenta.com/ns/{\#}{\textgreater}{\&}{\#}8722;1{\textless}/sup{\textgreater} w.e., respectively.},
author = {Bauder, Andreas and Funk, Martin and Huss, Matthias},
doi = {10.3189/172756407782871701},
journal = {Annals of Glaciology},
number = {1},
pages = {145--149},
title = {{Ice-volume changes of selected glaciers in the Swiss Alps since the end of the 19th century}},
url = {http://www.ingentaconnect.com/content/igsoc/agl/2007/00000046/00000001/art00022},
volume = {46},
year = {2007}
}
@article{Jiang2012,
abstract = {The runoff from the Laohahe basin in northern China has been greatly influenced by climate variability and human activities, and it is very important to quantitatively analyze these effects. Three methods, the Mann–Kendall test, ordered clustering and double cumulative curve were used to detect the trend and change points in annual precipitation and runoff for the period from 1964 to 2008, and the runoff series were divided into a ‘natural period' (1964–1979) and a ‘human-induced period' (1980–2008). Then the three-layer Variable Infiltration Capacity (VIC-3L) model was used to quantitatively evaluate the effects of climate variability and human activities on runoff. The results show that compared with the ‘natural period', the annual precipitation varied by -10, 10 and -10{\%} during the periods of 1980–1989, 1990–1999 and 2000–2008, respectively, while the corresponding yearly runoff changed by -57, 17 and -72{\%}, respectively. It was found that the range of yearly runoff percentage change is much larger than the range of annual precipitation variation. Additionally, the computing effects of human activities on runoff decreasing are more evident during the two drier periods of 1980–1989 and 2000–2008 with the contribution of 70 and 78{\%}, respectively, while that of the wetter period of 1990–1999 is only 21{\%}. It is suggested that within the Laohahe basin human activities are the main reason that runoff decreased during the two drier periods of 1980–1989 and 2000–2008, while the increasing of the runoff during the wetter period of 1990–1999 is mainly attributed to the climate variability.},
author = {Jiang, Shanhu and Ren, Liliang and Yong, Bin and Fu, Congbin and Yang, Xiaoli},
doi = {10.2166/nh.2011.133},
journal = {Hydrology Research},
number = {1-2},
pages = {3--13},
publisher = {IWA Publishing},
title = {{Analyzing the effects of climate variability and human activities on runoff from the Laohahe basin in northern China}},
url = {http://www.iwaponline.com/nh/043/nh0430003.htm},
volume = {43},
year = {2012}
}
@techreport{Lawrence2009,
author = {Lawrence, Deborah and Haddeland, Ingjerd and Langsholt, Elin},
booktitle = {Oslo, Norway: Norwegian Water Resources and Energy Directorate},
institution = {Norwegian Water Resources and Energy Directorate},
number = {1},
title = {{Calibration of HBV hydrological models using PEST parameter estimation}},
url = {http://www.nve.no/Global/Publikasjoner/Publikasjoner 2009/Report 2009/report1-09.pdf},
year = {2009}
}
@article{Fujita2006,
author = {Fujita, Koji and Thompson, Lonnie G and Ageta, Yutaka and Yasunari, Tetsuzo and Kajikawa, Yoshiyuki and Sakai, Akiko and Takeuchi, Nozomu},
doi = {10.1029/2005JD005894},
issn = {2156-2202},
journal = {Journal of Geophysical Research: Atmospheres},
keywords = {Himalayas,glacier,melt index},
number = {D3},
pages = {D03109},
title = {{Thirty-year history of glacier melting in the Nepal Himalayas}},
url = {http://dx.doi.org/10.1029/2005JD005894},
volume = {111},
year = {2006}
}
@article{Hagg2007,
author = {Hagg, W and Braun, L N and Kuhn, M and Nesgaard, T I},
doi = {10.1016/j.jhydrol.2006.06.021},
issn = {0022-1694},
journal = {Journal of Hydrology},
keywords = {Runoff modelling},
number = {1-2},
pages = {40--53},
title = {{Modelling of hydrological response to climate change in glacierized {\{}Central Asian catchments{\}}}},
url = {http://www.sciencedirect.com/science/article/pii/S0022169406003337},
volume = {332},
year = {2007}
}
@article{Immerzeel2010,
abstract = {More than 1.4 billion people depend on water from the Indus, Ganges, Brahmaputra, Yangtze, and Yellow rivers. Upstream snow and ice reserves of these basins, important in sustaining seasonal water availability, are likely to be affected substantially by climate change, but to what extent is yet unclear. Here, we show that meltwater is extremely important in the Indus basin and important for the Brahmaputra basin, but plays only a modest role for the Ganges, Yangtze, and Yellow rivers. A huge difference also exists between basins in the extent to which climate change is predicted to affect water availability and food security. The Brahmaputra and Indus basins are most susceptible to reductions of flow, threatening the food security of an estimated 60 million people.},
annote = {decreased runoff on Indus and Bhrahmaputra basins of 2046-2065 compared to 2000-2007 by A1B scenarios},
author = {Immerzeel, Walter W and van Beek, Ludovicus P H and Bierkens, Marc F P},
doi = {10.1126/science.1183188},
journal = {Science},
number = {5984},
pages = {1382--1385},
title = {{Climate Change Will Affect the Asian Water Towers}},
url = {http://www.sciencemag.org/content/328/5984/1382.abstract},
volume = {328},
year = {2010}
}
@article{Mathison2015,
author = {Mathison, C. and Wiltshire, A. J. and Falloon, P. and Challinor, A. J.},
doi = {10.5194/hessd-12-5789-2015},
issn = {1812-2116},
journal = {Hydrology and Earth System Sciences Discussions},
language = {English},
month = {jun},
number = {6},
pages = {5789--5840},
publisher = {Copernicus GmbH},
title = {{South Asia river flow projections and their implications for water resources}},
url = {http://www.hydrol-earth-syst-sci-discuss.net/12/5789/2015/hessd-12-5789-2015.html},
volume = {12},
year = {2015}
}
@article{Koutsoyiannis2007,
author = {Koutsoyiannis, Demetris and Montanari, Alberto},
doi = {10.1029/2006WR005592},
issn = {1944-7973},
journal = {Water Resources Research},
keywords = {Hurst phenomenon,climate change,long memory,long-term persistence,stochastic processes},
number = {5},
title = {{Statistical analysis of hydroclimatic time series: Uncertainty and insights}},
url = {http://dx.doi.org/10.1029/2006WR005592},
volume = {43},
year = {2007}
}
@article{Pastor2014,
annote = {comparison of the methods},
author = {Pastor, A V and Ludwig, F and Biemans, H and Hoff, H and Kabat, P},
doi = {10.5194/hess-18-5041-2014},
journal = {Hydrology and Earth System Sciences},
number = {12},
pages = {5041--5059},
title = {{Accounting for environmental flow requirements in global water assessments}},
url = {http://www.hydrol-earth-syst-sci.net/18/5041/2014/},
volume = {18},
year = {2014}
}
@article{Kain2004,
author = {Kain, John S},
doi = {10.1175/1520-0450(2004)043<0170:TKCPAU>2.0.CO;2},
journal = {Journal of Applied Meteorology},
number = {1},
pages = {170--181},
title = {{The Kain-Fritsch convective parameterization: an update}},
url = {http://journals.ametsoc.org/doi/abs/10.1175/1520-0450{\%}282004{\%}29043{\%}3C0170{\%}3ATKCPAU{\%}3E2.0.CO{\%}3B2},
volume = {43},
year = {2004}
}
@article{Fujita2014,
author = {Fujita, K and Sakai, A},
doi = {10.5194/hess-18-2679-2014},
journal = {Hydrology and Earth System Sciences},
number = {7},
pages = {2679--2694},
title = {{Modelling runoff from a Himalayan debris-covered glacier}},
url = {http://www.hydrol-earth-syst-sci.net/18/2679/2014/},
volume = {18},
year = {2014}
}
@article{Luthi2009,
abstract = {The transient response of glaciers to climate variations is investigated with a novel low-order model of an idealized glacier resting on uniformly inclined bedrock. The model consists of two volumes representing the accumulation and ablation areas, which are joined by a flux gate controlling mass flow according to the shallow-ice approximation. Under the assumption of a constant vertical mass-balance gradient, a volume–length scaling relation is derived which depends explicitly on mass-balance gradient and bedrock slope. Analytic expressions for the volume and area timescales are given, which are inversely proportional to the mass-balance gradient and a geometric factor which is the ratio between the vertical extent of the ablation area and the ice thickness at the equilibrium line. From the low-order model, a dynamical system in length and volume is obtained. Results from this system are in good agreement with solutions obtained from a transient finite-element model solving the full force-balance and mass-conservation equations. Under periodic forcing there are significant deviations of the length response, which show that the usual relaxation-type parameterization of length change is not well suited for short-term reactions. Switching on and off periodic climate forcing, the model glaciers show surprisingly large initial and final transient responses that have not been investigated before. These results are of significance for the interpretation of length and thickness changes observed on glaciers.},
author = {L{\"{u}}thi, Martin P},
doi = {10.3189/002214309790152519},
journal = {Journal of Glaciology},
number = {193},
pages = {918--930},
title = {{Transient response of idealized glaciers to climate variations}},
url = {http://www.ingentaconnect.com/content/igsoc/jog/2009/00000055/00000193/art00020},
volume = {55},
year = {2009}
}
@article{Tangborn1984,
abstract = {Glaciers affect hydroelectric development by storing and rapidly releasing liquid water, by increasing the sediment load of a stream, by providing a constant source of streamflow and by acting as naturally regulated storage reservoirs. A study was conducted in northern British Columbia to predict the probable maximum flood from a glacierized watershed in which three hydroelectric dams are planned. A streamflow model was developed to predict runoff based on weather data recorded at two stations that have been in operation since 1918. The model calculates daily glacier accumulation, ablation and the resulting annual net balance. An englacial storage and release of liquid water mechanism is proposed that is controlled primarily by season. Inflow to englacial storage is assumed to occur from late fall to mid-July, and release from storage for the remainder of the year. Implementation of this algorithm significantly reduced overall simulation error, particularly during the inflow period. The effect of the annual mass balance of these glaciers on watershed runoff was calculated for the 65 year period that these data were synthesized. It was found that increases or decreases in annual runoff of up to 40{\%} occur in the sub-basin that is 67{\%} glacierized.},
author = {Tangborn, Wendell V},
doi = {10.2307/520699},
issn = {04353676},
journal = {Geografiska Annaler. Series A, Physical Geography},
number = {3},
pages = {257--265},
publisher = {Wiley on behalf of the Swedish Society for Anthropology and Geography},
title = {{Prediction of Glacier Derived Runoff for Hydroelectric Development}},
url = {http://www.jstor.org/stable/520699},
volume = {66},
year = {1984}
}
@article{Tang2007a,
author = {Tang, Y. and Reed, P. and Wagener, T. and van Werkhoven, K.},
doi = {10.5194/hess-11-793-2007},
issn = {1607-7938},
journal = {Hydrology and Earth System Sciences},
language = {English},
month = {feb},
number = {2},
pages = {793 -- 817},
publisher = {Copernicus GmbH},
title = {{Comparing sensitivity analysis methods to advance lumped watershed model identification and evaluation}},
url = {http://www.hydrol-earth-syst-sci.net/11/793/2007/hess-11-793-2007.html},
volume = {11},
year = {2007}
}
@article{Gotzinger2007,
annote = {global HBV for parameter regionalisation and bad in Karst region},
author = {G{\"{o}}tzinger, J and B{\'{a}}rdossy, A},
doi = {10.1016/j.jhydrol.2006.09.008},
issn = {0022-1694},
journal = {Journal of Hydrology},
keywords = {Rainfall-runoff model},
number = {2-4},
pages = {374--384},
title = {{Comparison of four regionalisation methods for a distributed hydrological model}},
url = {http://www.sciencedirect.com/science/article/pii/S0022169406004793},
volume = {333},
year = {2007}
}
@article{Hannah2011,
annote = {Data access},
author = {Hannah, David M. and Demuth, Siegfried and van Lanen, Henny A. J. and Looser, Ulrich and Prudhomme, Christel and Rees, Gwyn and Stahl, Kerstin and Tallaksen, Lena M.},
doi = {10.1002/hyp.7794},
issn = {08856087},
journal = {Hydrological Processes},
keywords = {discharge data},
mendeley-tags = {discharge data},
month = {mar},
number = {7},
pages = {1191--1200},
title = {{Large-scale river flow archives: importance, current status and future needs}},
url = {http://doi.wiley.com/10.1002/hyp.7794},
volume = {25},
year = {2011}
}
@article{Harlin1992,
annote = {HBV mode parameter sensitivity},
author = {Harlin, Joakim and Kung, Chen-Shan},
doi = {10.1016/0022-1694(92)90057-3},
issn = {0022-1694},
journal = {Journal of Hydrology},
number = {1-4},
pages = {209--230},
title = {{Parameter uncertainty and simulation of design floods in Sweden}},
url = {http://www.sciencedirect.com/science/article/pii/0022169492900573},
volume = {137},
year = {1992}
}
@article{Strahler1957,
annote = {watershed geomorhpology index;},
author = {Strahler, A N},
doi = {10.1029/TR038i006p00913},
journal = {Transactions, American Geophysical Union},
number = {6},
pages = {913--920},
title = {{Quantitative analysis of watershed geomorphology}},
url = {http://adsabs.harvard.edu/abs/1957TrAGU..38..913S},
volume = {38},
year = {1957}
}
@incollection{Martina2008,
author = {Martina, M L V and Todini, E},
booktitle = {Hydrological Modelling and the Water Cycle},
editor = {Sorooshian, Soroosh and Hsu, Kuo-Lin and Coppola, Erika and Tomassetti, Barbara and Verdecchia, Marco and Visconti, Guido},
number = {10},
pages = {229--241},
publisher = {Springer},
title = {{Watershed Hydrological Modeling: Toward Physically Meaningful Processes Representation}},
volume = {63},
year = {2008}
}
@article{Singh2002,
author = {Singh, V and Woolhiser, D},
doi = {10.1061/(ASCE)1084-0699(2002)7:4(270)},
journal = {Journal of Hydrologic Engineering},
number = {4},
pages = {270--292},
title = {{Mathematical Modeling of Watershed Hydrology}},
url = {http://ascelibrary.org/doi/abs/10.1061/{\%}28ASCE{\%}291084-0699{\%}282002{\%}297{\%}3A4{\%}28270{\%}29},
volume = {7},
year = {2002}
}
@article{Beldring2002,
annote = {runoff model in glacier area and forest;},
author = {Beldring, Stein},
doi = {10.2166/nh.2002.021},
journal = {Nordic hydrology},
number = {5},
pages = {347--372},
title = {{Runoff generating processes in boreal forest environments with glacial tills}},
url = {http://www.iwaponline.com/nh/033/nh0330347.htm},
volume = {33},
year = {2002}
}
@article{Yapo1996,
abstract = {The identification of hydrologic models requires that appropriate data be selected for model calibration. In the research presented here, the shuffled complex evolution (SCE-UA) global optimization method was used to calibrate the NWSRFS-SMA conceptual rainfall-runoff flood forecasting model of the {\{}US{\}} National Weather Service, using a 40-year record of historical data. Based on 344 calibration runs using different lengths of data from different sections of the historical record, we conclude that approximately 8 years of data are required to obtain calibrations that are relatively insensitive to the period selected. Further, the reduction in parameter uncertainty is maximal when the wettest data periods on record are used. A residual analysis is used to compare the performance of the daily root mean square (DRMS) and heteroscedastic maximum likelihood error (HMLE) objective functions. The results suggest that the factor currently limiting model performance is the unavailability of strategies that explicitly account for model error during calibration.},
annote = {usually the calibrated period is eight yeras and wet period can reduce thr parameter uncertainity},
author = {Yapo, Patrice O and Gupta, Hoshin Vijai and Sorooshian, Soroosh},
doi = {10.1016/0022-1694(95)02918-4},
issn = {0022-1694},
journal = {Journal of Hydrology},
number = {1-4},
pages = {23--48},
title = {{Automatic calibration of conceptual rainfall-runoff models: sensitivity to calibration data}},
url = {http://www.sciencedirect.com/science/article/pii/0022169495029184},
volume = {181},
year = {1996}
}
@misc{R2015,
author = {CRAN},
month = {apr},
title = {{An Introduction to R}},
url = {http://cran.r-project.org/doc/manuals/R-intro.html{\#}The-array{\_}0028{\_}0029-function},
year = {2015}
}
@article{Gaughan2013,
abstract = {Spatially accurate, contemporary data on human population distributions are vitally important to many applied and theoretical researchers. The Southeast Asia region has undergone rapid urbanization and population growth over the past decade, yet existing spatial population distribution datasets covering the region are based principally on population count data from censuses circa 2000, with often insufficient spatial resolution or input data to map settlements precisely. Here we outline approaches to construct a database of GIS-linked circa 2010 census data and methods used to construct fine-scale (∼100 meters spatial resolution) population distribution datasets for each country in the Southeast Asia region. Landsat-derived settlement maps and land cover information were combined with ancillary datasets on infrastructure to model population distributions for 2010 and 2015. These products were compared with those from two other methods used to construct commonly used global population datasets. Results indicate mapping accuracies are consistently higher when incorporating land cover and settlement information into the AsiaPop modelling process. Using existing data, it is possible to produce detailed, contemporary and easily updatable population distribution datasets for Southeast Asia. The 2010 and 2015 datasets produced are freely available as a product of the AsiaPop Project and can be downloaded from: www.asiapop.org.},
author = {Gaughan, Andrea E and Stevens, Forrest R and Linard, Catherine and Jia, Peng and Tatem, Andrew J},
doi = {10.1371/journal.pone.0055882},
issn = {1932-6203},
journal = {PloS one},
keywords = {Asia,Censuses,Databases,Demography,Factual,Humans,Maps as Topic,Models,Population,Population Density,Southeastern,Theoretical},
month = {jan},
number = {2},
pages = {e55882},
pmid = {23418469},
title = {{High resolution population distribution maps for Southeast Asia in 2010 and 2015.}},
url = {http://journals.plos.org/plosone/article?id=10.1371/journal.pone.0055882{\#}pone-0055882-g005},
volume = {8},
year = {2013}
}
@article{Xu2005a,
annote = {actual evaporation in different climate regions},
author = {Xu, C.-Y. and Singh, V},
doi = {10.1016/j.jhydrol.2004.10.024},
issn = {0022-1694},
journal = {Journal of Hydrology},
keywords = {Actual evapotranspiration},
number = {1-4},
pages = {105--121},
title = {{Evaluation of three complementary relationship evapotranspiration models by water balance approach to estimate actual regional evapotranspiration in different climatic regions}},
url = {http://www.sciencedirect.com/science/article/pii/S0022169404005256},
volume = {308},
year = {2005}
}
@article{Barnett2005,
author = {Barnett, Tim P and Adam, Jennifer C and Lettenmaier, Dennis P},
doi = {10.1038/nature04141},
journal = {Nature},
number = {7066},
pages = {303--309},
publisher = {Nature Publishing Group},
title = {{Potential impacts of a warming climate on water availability in snow-dominated regions}},
url = {http://www.nature.com/nature/journal/v438/n7066/full/nature04141.html},
volume = {438},
year = {2005}
}
@article{Yan2014,
author = {Yan, Changan and Zhang, Wanchang},
doi = {10.2166/nh.2014.182},
issn = {0029-1277},
journal = {Hydrology Research},
keywords = {Hydrological Simulation Program – Fortran,hydrological model,parameters,performance,segmentation approach,spatial discretization},
language = {en},
month = {dec},
number = {6},
pages = {893--907},
publisher = {IWA Publishing},
title = {{Effects of model segmentation approach on the performance and parameters of the Hydrological Simulation Program – Fortran (HSPF) models}},
url = {http://www.iwaponline.com/nh/045/nh0450893.htm},
volume = {45},
year = {2014}
}
@inproceedings{Mulvaney1851,
author = {Mulvaney, T J},
booktitle = {Proceedings of the institution of Civil Engineers of Ireland},
number = {2},
pages = {18--33},
series = {4},
title = {{On the use of self-registering rain and flood gauges in making observations of the relations of rainfall and flood discharges in a given catchment}},
url = {http://iahs.info/Publications-News.do?dmsSearch{\_}pubno=BM4},
year = {1851}
}
@article{McIntyre2005,
abstract = {A new approach to regionalization of conceptual rainfall-runoff models is presented on the basis of ensemble modeling and model averaging. It is argued that in principle, this approach represents an improvement on the established procedure of regressing parameter values against numeric catchment descriptors. Using daily data from 127 catchments in the United Kingdom, alternative schemes for defining prior and posterior likelihoods of candidate models are tested in terms of accuracy of ungauged catchment predictions. A probability distributed model structure is used, and alternative parameter sets are identified using data from each of a number of gauged catchments. Using the models of the 10 gauged catchments most similar to the ungauged catchment provides generally the best results and performs significantly better than the regression method, especially for predicting low flows. The ensemble of candidate models provides an indication of uncertainty in ungauged catchment predictions, although this is not a robust estimate of possible flow ranges, and frequently fails to encompass flow peaks. Options for developing the new method to resolve these problems are discussed.},
annote = {Uncertainty assessment; ungauged catchments; ensemble weighting},
author = {McIntyre, Neil and Lee, Hyosang and Wheater, Howard and Young, Andy and Wagener, Thorsten},
doi = {10.1029/2005WR004289},
issn = {1944-7973},
journal = {Water Resources Research},
keywords = {ensemble modeling,rainfall-runoff model,uncertainty,ungauged basins},
number = {12},
pages = {W12434},
title = {{Ensemble predictions of runoff in ungauged catchments}},
url = {http://dx.doi.org/10.1029/2005WR004289},
volume = {41},
year = {2005}
}
@article{Dimri2013,
abstract = {The Himalayan region is characterized by pronounced topographic heterogeneity and land use variability from west to east, with a large variation in regional climate patterns. Over the western part of the region, almost one-third of the annual precipitation is received in winter during cyclonic storms embedded in westerlies, known locally as the western disturbance. In the present paper, the regional winter climate over the western Himalayas is analyzed from simulations produced by two regional climate models (RCMs) forced with large-scale fields from ERA-Interim. The analysis was conducted by the composition of contrasting (wet and dry) winter precipitation years. The findings showed that RCMs could simulate the regional climate of the western Himalayas and represent the atmospheric circulation during extreme precipitation years in accordance with observations. The results suggest the important role of topography in moisture fluxes, transport and vertical flows. Dynamical downscaling with RCMs represented regional climates at the mountain or even event scale. However, uncertainties of precipitation scale and liquid-solid precipitation ratios within RCMs are still large for the purposes of hydrological and glaciological studies.},
author = {Dimri, A P and Yasunari, T and Wiltshire, A and Kumar, P and Mathison, C and Ridley, J and Jacob, D},
doi = {10.1016/j.scitotenv.2013.01.040},
file = {::},
issn = {1879-1026},
journal = {The Science of the total environment},
keywords = {Climate,Cyclonic Storms,Environmental Monitoring,Environmental Monitoring: methods,India,Models, Theoretical,Rain,Seasons,Temperature,Uncertainty},
month = {dec},
pages = {S36--47},
pmid = {23411117},
title = {{Application of regional climate models to the Indian winter monsoon over the western Himalayas.}},
url = {http://www.sciencedirect.com/science/article/pii/S0048969713000594},
volume = {468-469 Su},
year = {2013}
}
@article{Ding2006,
author = {Ding, Yongjian and Liu, Shiyin and Li, Jing and Shangguan, Donghui},
doi = {10.3189/172756406781812005},
journal = {Annals of Glaciology},
number = {1},
pages = {97--105},
publisher = {International Glaciological Society},
title = {{The retreat of glaciers in response to recent climate warming in western China}},
volume = {43},
year = {2006}
}
@article{Huang2011,
abstract = {The Moderate Resolution Imaging Spectroradiometer (MODIS)/Terra daily snow cover product MOD10A1 was compared with in situ climate station measurements and a snow map generated from Landsat Enhanced Thematic Mapper Plus (ETM+) data. Snow-covered area (SCA) dynamics were assessed using the MODIS 8-day snow cover composite product MOD10A2 for the 2001–2005 snow seasons in northern Xinjiang, China. The results indicate that the snow-mapping agreement between MODIS daily snow maps and surface observations is high at 94.6{\%} over the four snow seasons under clear-sky conditions. The snow classification accuracy in a mountainous area was lower than that in a plain area and caused higher omission errors, probably resulting in an underestimation of the SCA. The omission errors were mainly determined by snow depth, land cover types, the terrain and mixed pixels. The cloud agreement was 95.9{\%}, and approximately 4.1{\%} of cloud was misclassified as snow when the sky view at the climate stations was covered by clouds. An...},
author = {Huang, Xiaodong and Liang, Tiangang and Zhang, Xuetong and Guo, Zhenggang},
doi = {10.1080/01431160903439924},
isbn = {International Journal of Remote Sensing, Vol. 32, No. 1, 10 January 2011, pp. 133–152},
issn = {0143-1161},
journal = {International Journal of Remote Sensing},
language = {en},
month = {jan},
number = {1},
pages = {133--152},
publisher = {Taylor {\&} Francis},
title = {{Validation of MODIS snow cover products using Landsat and ground measurements during the 2001–2005 snow seasons over northern Xinjiang, China}},
url = {http://www.tandfonline.com/doi/abs/10.1080/01431160903439924},
volume = {32},
year = {2011}
}
@misc{Internet,
author = {Internetgeography},
keywords = {GEOGRAPHY,Geography,coast,coastal deposition,coastal erosion,coasts,deposition,erosion,games,gcse,geography,geography. case studies,help,holderness,key stage 3,lesson plans,links,quiz,revision,search},
title = {{Population distribution / density / change}},
url = {http://www.geography.learnontheinternet.co.uk/topics/popn1.html},
urldate = {2015-02-27},
year = {2015}
}
@article{doi:10.1623/hysj.48.2.257.44693,
abstract = {Abstract A conceptual snowmelt model, which accounts for both the snowmelt and rainfall runoff was developed and applied for daily streamflow simulation for the Satluj River basin located in the western Himalayan region. The model, designed primarily for mountainous basins, conceptualizes the basin as a number of elevation zones depending upon the topographic relief. The basic inputs to the model are temperature, precipitation and snow-covered area. The snowmelt is computed using the degree-day approach and rain induced melting was also considered. The model was calibrated using a data set of three years (1985/86?€“1987/88) and model parameters were optimized. Using these optimized parameters, simulations of daily streamflow were made for a period of six years (1988/89?€“1990/91 and 1996/97?€“1998/99). The model performed well for both calibration and simulation periods. The model was also used to estimate the contribution from the snowmelt and rainfall to the seasonal and annual flows.},
author = {Singh, Pratap and Jain, S K},
doi = {10.1623/hysj.48.2.257.44693},
journal = {Hydrological Sciences Journal},
number = {2},
pages = {257--276},
title = {{Modelling of streamflow and its components for a large Himalayan basin with predominant snowmelt yields}},
url = {http://dx.doi.org/10.1623/hysj.48.2.257.44693},
volume = {48},
year = {2003}
}
@article{Dee2011,
author = {Dee, D P and Uppala, S M and Simmons, A J and Berrisford, P and Poli, P and Kobayashi, S and Andrae, U and Balmaseda, M A and Balsamo, G and Bauer, P and Bechtold, P and Beljaars, A C M and van de Berg, L and Bidlot, J and Bormann, N and Delsol, C and Dragani, R and Fuentes, M and Geer, A J and Haimberger, L and Healy, S B and Hersbach, H and H{\'{o}}lm, E V and Isaksen, L and K{\aa}llberg, P and K{\"{o}}hler, M and Matricardi, M and McNally, A P and Monge-Sanz, B M and Morcrette, J.-J. and Park, B.-K. and Peubey, C and de Rosnay, P and Tavolato, C and Th{\'{e}}paut, J.-N. and Vitart, F},
doi = {10.1002/qj.828},
issn = {1477-870X},
journal = {Quarterly Journal of the Royal Meteorological Society},
keywords = {4D-Var,Dee2011,ERA-40,forecast model,hydrological cycle,observations,stratospheric circulation},
mendeley-tags = {Dee2011},
number = {656},
pages = {553--597},
publisher = {John Wiley {\&} Sons, Ltd.},
title = {{The ERA-Interim reanalysis: configuration and performance of the data assimilation system}},
url = {http://onlinelibrary.wiley.com/doi/10.1002/qj.828/full},
volume = {137},
year = {2011}
}
@article{Beven1989,
abstract = {This paper argues that there are fundamental problems in the application of physically-based models for practical prediction in hydrology. These problems result from limitations of the model equations relative to a heterogeneous reality; the lack of a theory of subgrid scale integration; practical constraints on solution methodologies; and problems of dimensionality in parameter calibration. It is suggested that most current applications of physically-based models use them as lumped conceptual models at the grid scale. Recent papers on physically-based models have misunderstood and misrepresented these limitations. There are practical hydrological problems requiring physically-based predictions, and there will continue to be a need for physically-based models but ideas about their capabilities must change so that future applications attempt to obtain realistic estimates of the uncertainty associated with their predictions, particularly in the case of evaluating future scenarios of the effects of management strategies.},
annote = {This paper argues that there are fundamental problems in the application of physically-based models for practical prediction in hydrology. These problems result from limitations of the model equations relative to a heterogeneous reality; the lack of a theory of subgrid scale integration; practical constraints on solution methodologies; and problems of dimensionality in parameter calibration. It is suggested that most current applications of physically-based models use them as lumped conceptual models at the grid scale. Recent papers on physically-based models have misunderstood and misrepresented these limitations. There are practical hydrological problems requiring physically-based predictions, and there will continue to be a need for physically-based models but ideas about their capabilities must change so that future applications attempt to obtain realistic estimates of the uncertainty associated with their predictions, particularly in the case of evaluating future scenarios of the effects of management strategies.},
author = {Beven, Keith},
doi = {10.1016/0022-1694(89)90101-7},
issn = {0022-1694},
journal = {Journal of Hydrology},
number = {1-2},
pages = {157--172},
title = {{Changing ideas in hydrology {\{}$\backslash$textemdash{\}} The case of physically-based models}},
url = {http://www.sciencedirect.com/science/article/pii/0022169489901017},
volume = {105},
year = {1989}
}
@article{Wiltshire2014,
author = {Wiltshire, A J},
doi = {10.5194/tc-8-941-2014},
journal = {The Cryosphere},
number = {3},
pages = {941--958},
title = {{Climate change implications for the glaciers of the Hindu Kush, Karakoram and Himalayan region}},
url = {http://www.the-cryosphere.net/8/941/2014/},
volume = {8},
year = {2014}
}
@article{Kim2016,
author = {Kim, J. and Park, S. K.},
doi = {10.5194/hess-20-651-2016},
issn = {1607-7938},
journal = {Hydrology and Earth System Sciences},
language = {English},
month = {feb},
number = {2},
pages = {651--658},
publisher = {Copernicus GmbH},
title = {{Uncertainties in calculating precipitation climatology in East Asia}},
url = {http://www.hydrol-earth-syst-sci.net/20/651/2016/},
volume = {20},
year = {2016}
}
@article{li2013implementation,
author = {Li, Hong and Beldring, Stein and Xu, C.-Y.},
doi = {10.2166/nh.2013.009},
journal = {Hydrology Research},
number = {3},
pages = {322--333},
title = {{Implementation and testing of routing algorithms in the distributed Hydrologiska Byr{\{}{\aa}{\}}ns Vattenbalansavdelning model for mountainous catchments}},
url = {http://www.iwaponline.com/nh/045/nh0450322.htm},
volume = {45},
year = {2014}
}
@article{Singh1997316,
abstract = {The effect of climate change on snow water equivalent, snowmelt runoff, glacier melt runoff and total streamflow and their distribution is examined for the Spiti river. This is a high altitude Himalayan river located in the western Himalayan region. The total streamflow of this river has a significant contribution from snow and glacier melt runoff. Plausible hypothetical scenarios of temperature and precipitation changes based on the simulation of climate change over the Indian subcontinent by the Hamburg climate model are adopted in the present study. The {\{}UBC{\}} watershed model was used to simulate the hydrological response of the basin under changed climatic scenarios. The adopted changes in temperature and precipitation covered a range from 1 to 3{\^{A}}°C and from {\^{a}}ˆ'10 to +10{\%}, respectively. Snow water equivalent reduces with an increase in air temperature. However, no significant change is found in the snow water equivalent of the Spiti basin by the projected increase in air temperature (T+1 to T+3{\^{A}}°C). An increase of 2{\^{A}}°C in air temperature reduced annual snow water equivalent in the range of 1 to 7{\%}. Changes in precipitation caused proportional changes in snow water equivalent. It is found that annual snowmelt runoff, glacier melt runoff and total streamflow increase linearly with changes in temperature (1-3{\^{A}}°C), but the most prominent effect of increase in temperature has been noticed on glacier melt runoff for this high altitude basin. For example, an increase of 2{\^{A}}°C in air temperature has enhanced annual snowmelt runoff, glacier melt runoff and total streamflow in the range of 4-18{\%}, 33-38{\%} and 6-12{\%} respectively. The effect of change in precipitation (P{\^{a}}ˆ'10 to P+10{\%}) suggests a linear increase in snowmelt runoff and total streamflow, while, in general, glacier melt runoff is inversely related to changes in precipitation. Snowmelt runoff is found more sensitive than glacier melt runoff to changes in precipitation (P{\^{a}}ˆ'10 to P+10{\%}). Under a warmer climate scenario, snowmelt runoff and glacier melt runoff cause an earlier response of total streamflow and a change in flow distribution. The seasonal analysis of total streamflow indicates that an increase in air temperature produces an increase in the pre-monsoon season followed by an increase in the monsoon season. Implications of such seasonal changes are also briefly discussed. {\^{A}}{\textcopyright} 1997 Elsevier Science B.V.},
annote = {Spiti River is the north east of The Beas basin.
However, no significant change is found in the snow water equivalent of the Spiti basin by the projected increase in air temperature (T + 1 to T + 3C). It is found that annual snowmelt runoff, glacier melt runoff and total streamflow increase linearly with changes in temperature (1–3C),
The seasonal analysis of total streamflow indicates that an increase in air temperature produces an increase in the pre-monsoon season followed by an increase in the monsoon season.},
author = {Singh, Pratap and Kumar, Naresh},
doi = {10.1016/S0022-1694(96)03142-3},
issn = {0022-1694},
journal = {Journal of Hydrology},
number = {1-4},
pages = {316--350},
title = {{Impact assessment of climate change on the hydrological response of a snow and glacier melt runoff dominated Himalayan river}},
url = {http://www.sciencedirect.com/science/article/pii/S0022169496031423},
volume = {193},
year = {1997}
}
@article{Mayr201340,
abstract = {Summary We modified the well-known HBV-ETH model to develop a partially distributed hydrological model that was able to simulate runoff in a highly glacierised basin. By introducing additional calibration criteria (annual and winter glacier mass balance) we reduced the goodness-of-fit for runoff, but improved the description of the accumulation and ablation processes involved. Final adjustment of the model parameters, after choosing the best out of 10,000 random parameter sets, allowed us to find a parameter calibration with acceptable errors for all criteria, which was then confirmed by good model performance during the validation period. The glacier-wide winter mass balance and the annual mass balance in the ablation area were simulated well, while the annual mass balance in the accumulation area showed inaccuracies. Good simulation of the processes during the 2003 heat wave in Europe proved that the model also delivers reliable results for meteorological conditions different from those used during calibration.},
annote = {glaicer simulation in HBV-ETH with different calibration objective for mass balance; mass balance simulation increase with reduced discharge simulation},
author = {Mayr, Elisabeth and Hagg, Wilfried and Mayer, Christoph and Braun, Ludwig},
doi = {10.1016/j.jhydrol.2012.11.035},
issn = {0022-1694},
journal = {Journal of Hydrology},
keywords = {Conceptual hydrological models},
pages = {40--49},
title = {{Calibrating a spatially distributed conceptual hydrological model using runoff, annual mass balance and winter mass balance}},
url = {http://www.sciencedirect.com/science/article/pii/S0022169412010141},
volume = {478},
year = {2013}
}
@article{Yilmaz2014,
abstract = {The increased frequency and magnitude of extreme rainfall events due to anthropogenic climate change, and decadal and multi-decadal climate variability question the stationary climate assumption. The possible violation of stationarity in climate can cause erroneous estimation of design rainfalls derived from extreme rainfall frequency analysis. This may result in significant consequences for infrastructure and flood protection projects since design rainfalls are essential input for design of these projects. Therefore, there is a need to conduct frequency analysis of extreme rainfall events in the context of non-stationarity, when non-stationarity is present in extreme rainfall events. A methodology consisting of threshold selection, extreme rainfall data (peaks over threshold data) construction, trend and non-stationarity analysis, and stationary and non-stationary generalised Pareto distribution (GPD) models was developed in this paper to investigate trends and non-stationarity in extreme rainfall events, and potential impacts of climate change and variability on intensity–frequency–duration (IFD) relationships. The methodology developed was successfully implemented using rainfall data from an observation station in Melbourne (Australia) for storm durations ranging from 6 min to 72 h. Although statistically significant trends were detected in extreme rainfall data for storm durations of 30 min, 3 h and 48 h, statistical non-stationarity tests and non-stationary GPD models did not indicate non-stationarity for these storm durations and other storm durations. It was also found that the stationary GPD models were capable of fitting extreme rainfall data for all storm durations. Furthermore, the IFD analysis showed that urban flash flood producing hourly rainfall intensities have increased over time.},
author = {Yilmaz, A G and Hossain, I and Perera, B J C},
doi = {10.5194/hess-18-4065-2014},
journal = {Hydrology and Earth System Sciences},
number = {10},
pages = {4065--4076},
title = {{Effect of climate change and variability on extreme rainfall intensity-frequency-duration relationships: a case study of Melbourne}},
url = {http://www.hydrol-earth-syst-sci.net/18/4065/2014/},
volume = {18},
year = {2014}
}
@misc{ELVIS2011,
author = {NVE},
month = {feb},
title = {{The National River Network Database (ELVIS)}},
url = {http://www.nve.no/en/Water/NVEs-geographic-databases/The-National-River-Network-Database-ELVIS/},
year = {2015}
}
@article{Naz2014,
author = {Naz, B S and Frans, C D and Clarke, G K C and Burns, P and Lettenmaier, D P},
doi = {10.5194/hess-18-787-2014},
journal = {Hydrology and Earth System Sciences},
number = {2},
pages = {787--802},
title = {{Modeling the effect of glacier recession on streamflow response using a coupled glacio-hydrological model}},
url = {http://www.hydrol-earth-syst-sci.net/18/787/2014/},
volume = {18},
year = {2014}
}
@article{Arora2014,
author = {Arora, Manohar and Kumar, Rakesh and Kumar, Naresh and Malhotra, Jatin},
doi = {10.2166/nh.2013.129},
journal = {Hydrology Research},
number = {2},
pages = {292--306},
publisher = {IWA Publishing},
title = {{Assessment of suspended sediment concentration and load from a large Himalayan glacier}},
url = {http://www.iwaponline.com/nh/045/0292/0450292.pdf},
volume = {45},
year = {2014}
}
@article{Xu1996,
abstract = {One of the main purposes of a water balance study is to evaluate the net available water resources, both on the surface and in the subsurface. Water balance models that simulate hydrographs of river flow on the basis of available meteorological data would be a valuable tool in the hands of the planners and designers of water resources systems. In this paper, a set of simple monthly snow and water balance models has been developed and applied to regional water balance studies in the NOPEX area. The models require as input monthly areal precipitation, monthly long-term average potential evapotranspiration and monthly mean air temperature. The model outputs are monthly river flow and other water balance components, such as actual evapotranspiration, slow and fast components of river flow, snow accumulation and melting. The results suggest that the proposed model structure is suitable for water balance study purposes in seasonally snow-covered catchments located in the region.},
author = {Xu, C.-Y. and Seibert, J and Halldin, S},
doi = {10.1016/0022-1694(95)02888-9},
issn = {0022-1694},
journal = {Journal of Hydrology},
number = {1-4},
pages = {211--236},
title = {{Regional water balance modelling in the NOPEX area: development and application of monthly water balance models}},
url = {http://www.sciencedirect.com/science/article/pii/0022169495028889},
volume = {180},
year = {1996}
}
@article{Widen-Nilsson2007,
abstract = {Limitations in water quantity and quality are among the greatest social and economic problems facing mankind. However, difficulties in estimating the global long-term average runoff have led to differences of as much as 30{\%} when integrated to the whole earth. Model estimates of runoff are especially uncertain for the 50{\%} of the global land surface lacking consistent runoff data. In this study, we present the WASMOD-M global water-balance model, constructed to provide robust runoff estimates both for gauged and ungauged basins. WASMOD-M is a conceptual water-budgeting model with two state-variables and five tunable parameters. A simple parameter-value estimation procedure allowed “acceptable��? parameter values to be identified both for the majority of gauged basins, and for most ungauged basins. Acceptable global simulations could be accomplished with continentally constant parameter values but at the cost of compensating errors on a basin scale. A “standard��?, spatially-distributed parameter-value set was derived for a ��?best��? global simulation. Of the simulated 59132 0.5° × 0.5° cells, 45{\%} got “good��? parameter values as a by-product of regionalisation, 41{\%} from regionalisation, whereas 14{\%} were given a default value set. This global set allowed simulation of the 1915–2000 world water balance. The simulation was in the same range as previously published model results and compilations of runoff measurements. Long-term average within-year runoff variations agreed well with previously published results for most of the studied runoff stations although WASMOD-M was only calibrated against long-term average runoff. Improvement of WASMOD-M and other global water-balance models should be simplified by a common definition of basin boundaries and areas, as well as runoff. Further, modelling progress will depend on improved global datasets of precipitation and runoff regulation.},
annote = {global parameter of WASMOD estimation},
author = {Wid{\'{e}}n-Nilsson, Elin and Halldin, Sven and Xu, C.-Y.},
doi = {10.1016/j.jhydrol.2007.04.002},
issn = {0022-1694},
journal = {Journal of Hydrology},
keywords = {Global model},
number = {1-2},
pages = {105--118},
title = {{Global water-balance modelling with WASMOD-M: Parameter estimation and regionalisation}},
url = {http://www.sciencedirect.com/science/article/pii/S0022169407002120},
volume = {340},
year = {2007}
}
@article{Fekete2001,
annote = {river network upscale based on river width function (length)},
author = {Fekete, Bal{\'{a}}zs M and V{\"{o}}r{\"{o}}smarty, Charles J and Lammers, Richard B},
doi = {10.1029/2001WR900024},
issn = {1944-7973},
journal = {Water Resources Research},
number = {7},
pages = {1955--1967},
title = {{Scaling gridded river networks for macroscale hydrology: Development, analysis, and control of error}},
url = {http://dx.doi.org/10.1029/2001WR900024},
volume = {37},
year = {2001}
}
@book{rUNEP,
author = {Zemp, Michael and Roer, Isabelle and K{\"{a}}{\"{a}}b, Andreas and Hoelzle, Martin and Paul, Frank and Haeberli, Wilfried},
editor = {Zemp, Michael and van Woerden, Jaap},
publisher = {The United Nations Environment Programme and The World Glacier Monitoring Service},
title = {{Global Glacier Changes: Facts and Figures}},
url = {http://www.grid.unep.ch/glaciers/},
year = {2008}
}
@article{McMahon2011,
abstract = {Abstract Overlying the challenge of managing within natural hydroclimatic variability is the likely modification of runoff variability along with average runoff due to anthropogenic enhancement of greenhouse gas concentrations. In this paper analytical models are developed in which runoff mean and variability, the latter defined by the variance (or standard deviation) of annual runoff, are related to the variances and the covariance of annual precipitation and potential evapotranspiration, and the aridity index (mean annual potential evapotranspiration divided by mean annual precipitation). The method was validated using observed runoff data for 699 worldwide catchments. It was concluded that combining the Schreiber function, which relates the ratio of annual actual evapotranspiration to annual precipitation, with the analytical models provided satisfactory estimates of observed annual runoff mean and interannual variability. It was also concluded that estimates of annual runoff variability based on the s...},
author = {McMahon, Thomas A. and Peel, Murray C. and Pegram, Geoffrey G. S. and Smith, Ian N.},
doi = {10.1175/2010JHM1288.1},
issn = {1525-755X},
journal = {Journal of Hydrometeorology},
keywords = {Climate change,Evapotranspiration,Interannual variability,Precipitation,Runoff},
language = {EN},
month = {feb},
number = {1},
pages = {135--146},
title = {{A Simple Methodology for Estimating Mean and Variability of Annual Runoff and Reservoir Yield under Present and Future Climates}},
url = {http://journals.ametsoc.org/doi/abs/10.1175/2010JHM1288.1},
volume = {12},
year = {2011}
}
@techreport{Beldring2006,
author = {Beldring, Stein and Andr{\'{e}}asson, Johan and Bergstr{\"{o}}m, Sten and Engen-Skaugen, Torill and F{\o}rland, Eirik J. and J{\'{o}}nsd{\'{o}}ttir, J{\'{o}}na Finnd{\'{i}}s and Roald, Lars A. and Rosberg, J{\"{o}}rgen and Suomalainen, Merja and Tonning, Tore and Vehvil{\"{a}}inen, Bertel and Veijalainen, Noora},
title = {{Hydrological climate change maps of the Nordic countries}},
url = {http://www.nve.no/Global/Publikasjoner/Publikasjoner 2006/Report 2006/NVE Report 4{\_}06.pdf},
year = {2006}
}
@article{jasper2004differential,
author = {Jasper, Karsten and Calanca, Pierluigi and Gyalistras, Dimitrios and Fuhrer, Jurg},
doi = {10.3354/cr026113},
journal = {Climate Research},
number = {2},
pages = {113--129},
publisher = {INTER-RESEARCH NORDBUNTE 23, D-21385 OLDENDORF LUHE, GERMANY},
title = {{Differential impacts of climate change on the hydrology of two alpine river basins}},
url = {http://www.int-res.com/abstracts/cr/v26/n2/p113-129/},
volume = {26},
year = {2004}
}
@article{Zhang2014a,
author = {Zhang, Xuejun and Tang, Qiuhong and Pan, Ming and Tang, Yin},
doi = {10.1175/JHM-D-13-0170.1},
journal = {Journal of Hydrometeorology},
number = {5},
pages = {2067--2084},
title = {{A long-term land surface hydrologic fluxes and states dataset for China}},
url = {http://journals.ametsoc.org/doi/abs/10.1175/JHM-D-13-0170.1},
volume = {15},
year = {2014}
}
@article{Refsgaard1988,
abstract = {A general mathematical modelling system for real-time flood forecasting and flood control planning is described. The system comprises a lumped conceptual rainfall-runoff model, a hydrodynamic model for river routing, reservoir and flood plain simulation, an updating procedure for real-time operation and a comprehensive data management system. The system is presently applied for real-time forecasting of the two 20 000 km2 (Yamuna and Damodar) catchments in India as well as for flood control modelling at the same two catchments in India. In another project the system is being established for the entire Bangladesh with a coarse discretization and for the South East Region of Bangladesh with a fine model discretization. The objectives of the modelling application in Bangladesh are to enable predictions of the effects of alternative river regulation structures in terms of changes in water levels, inundations, siltration and salinity. The modelling system has been transferred to the Central Water Commission of India and the Master Plan Organization of Bangladesh in connection with comprehensive training programmes. The models are presently being operated by Indian and Bangladeshi engineers in the two countries.},
annote = {real time flood forecasting, conceptual model; hydraulic model; resevir regulation; flood palin simulation; indian Damodar catchment; coastal east area},
author = {Refsgaard, J C and Havno¸, K and Ammentorp, H C and Verwey, A},
doi = {10.1016/0309-1708(88)90043-7},
issn = {0309-1708},
journal = {Advances in Water Resources},
number = {2},
pages = {101--105},
title = {{Application of hydrological models for flood forecasting and flood control in India and Bangladesh}},
url = {http://www.sciencedirect.com/science/article/pii/0309170888900437},
volume = {11},
year = {1988}
}
@article{Hofgaard1997,
abstract = {tree line and climate change in different aspect,Vegetation samples collected along altitudinal transects through the treeline ecotone in the central Scandes Mountains, Norway, were used to analyse the relationships between species diversity, species turnover and the performance of the tree layer. The study area has a long history of extensive grazing by domestic animals. The floristic composition showed a continuous change along the boreal-alpine gradient. The number of species was more or less constant throughout 600 altitudinal m centred around the treeline, and the floristic similarity between neighbouring altitudes did not show any abrupt changes at any particular altitude. The treeline position (Betula pubescens Ehrh.) spanned 190 altitudinal m (range 980-1170 m a.s.l.). The number of trees and the basal area each decreased continuously with increasing altitude from 300 altitudinal m below the treeline. The number of birch saplings also decreased from c. 150 m below the treeline towards higher altitudes. Viable, but browsed populations of birch were present along the whole length of all transects, irrespective of aspect and geological substrate, with saplings present up to summit positions at 420 altitudinal m above the treeline. Due to browsing by sheep, mean sapling height at all altitudes above the treeline was 0.2 m. The results are discussed in terms of land use and climate change. It is concluded that future vegetation responses to diminished grazing pressure are likely to override responses forced by changing climate. Such responses could easily be misinterpreted as being governed by climate change, rather than by changes in land use.},
author = {Hofgaard, Annika},
doi = {10.2307/2997351},
journal = {Global Ecology and Biogeography Letters},
pages = {419--429},
publisher = {JSTOR},
title = {{Inter-relationships between treeline position, species diversity, land use and climate change in the central Scandes Mountains of Norway}},
url = {http://www.jstor.org/stable/2997351},
volume = {6},
year = {1997}
}
@article{Todini2011,
author = {Todini, E},
doi = {10.2166/nh.2011.096},
journal = {Hydrology Research},
number = {2-3},
pages = {73--85},
publisher = {IWA Publishing},
title = {{History and perspectives of hydrological catchment modelling}},
url = {http://www.iwaponline.com/nh/042/nh0420073.htm},
volume = {42},
year = {2011}
}
@article{Tang2007,
author = {Tang, Qiuhong and Oki, Taikan and Kanae, Shinjiro and Hu, Heping},
doi = {10.1175/JHM589.1},
journal = {Journal of Hydrometeorology},
number = {3},
pages = {499--512},
title = {{The influence of precipitation variability and partial irrigation within grid cells on a hydrological simulation}},
url = {http://journals.ametsoc.org/doi/abs/10.1175/JHM589.1},
volume = {8},
year = {2007}
}
@phdthesis{Jørandli2016,
author = {J{\o}randli, Lisa {\O}stvik},
file = {:C$\backslash$:/Users/holi/AppData/Local/Mendeley Ltd./Mendeley Desktop/Downloaded/J{\o}randli - 2016 - No Title.pdf:pdf},
school = {University of Oslo},
title = {{No Title}},
type = {Master},
url = {https://www.duo.uio.no/handle/10852/52171},
year = {2016}
}
@inproceedings{li2016evaluating,
author = {Li, Lu and Gochis, David J and Sobolowski, Stefan and Mesquita, Michel d S},
booktitle = {EGU General Assembly Conference Abstracts},
pages = {2480},
title = {{Evaluating the present annual water budget of a Himalayan headwater river basin using a high-resolution atmosphere-hydrology model}},
volume = {18},
year = {2016}
}
@techreport{Engeland2004,
author = {Engeland, Kolbj{\o}rn and Skaugen, Torill Engen and Haugen, Jan Erik and Beldring, Stein and F{\o}rland, Eirik},
title = {{Comparison of evaporation estimated by the HIRHAM and GWB models for present climate and climate change scenarios}},
url = {http://met.no/filestore/017{\_}2004.pdf},
year = {2004}
}
@article{Bolch2012,
abstract = {Himalayan glaciers are a focus of public and scientific debate. Prevailing uncertainties are of major concern because some projections of their future have serious implications for water resources. Most Himalayan glaciers are losing mass at rates similar to glaciers elsewhere, except for emerging indications of stability or mass gain in the Karakoram. A poor understanding of the processes affecting them, combined with the diversity of climatic conditions and the extremes of topographical relief within the region, makes projections speculative. Nevertheless, it is unlikely that dramatic changes in total runoff will occur soon, although continuing shrinkage outside the Karakoram will increase the seasonality of runoff, affect irrigation and hydropower, and alter hazards.},
annote = {glacier decrease in general; dramatic runoff change is unlikely},
author = {Bolch, T and Kulkarni, A and K{\"{a}}{\"{a}}b, A and Huggel, C and Paul, F and Cogley, J G and Frey, H and Kargel, J S and Fujita, K and Scheel, M and Bajracharya, S and Stoffel, M},
doi = {10.1126/science.1215828},
journal = {Science},
number = {6079},
pages = {310--314},
title = {{The State and Fate of Himalayan Glaciers}},
url = {http://www.sciencemag.org/content/336/6079/310.abstract},
volume = {336},
year = {2012}
}
@article{Kamiguchi2010,
author = {Kamiguchi, Kenji and Arakawa, Osamu and Kitoh, Akio and Yatagai, Akiyo and Hamada, Atsushi and Yasutomi, Natsuko},
doi = {10.3178/hrl.4.60},
journal = {Hydrological Research Letters},
keywords = {Kamiguchi2010},
mendeley-tags = {Kamiguchi2010},
pages = {60--64},
title = {{Development of APHRO{\_}JP, the first Japanese high-resolution daily precipitation product for more than 100 years}},
volume = {4},
year = {2010}
}
@techreport{Andreassen2012,
annote = {profiles of the same glacier with different volumes},
author = {Andreassen, Liss M and Winsvold, Solveig H and Paul, Frank and Hausberg, Jon Endre},
editor = {Andreassen, Liss M and Winsvold, Solveig H},
institution = {Norwegian Water Resources and Energy Directorate},
number = {38},
title = {{Inventory of Norwegian Glaciers}},
url = {http://webby.nve.no/publikasjoner/rapport/2012/rapport2012{\_}38.pdf},
year = {2012}
}
@article{polanski2010validation,
author = {Polanski, Stefan and Rinke, Annette and Dethloff, Klaus},
journal = {Advances in Meteorology},
publisher = {Hindawi Publishing Corporation},
title = {{Validation of the HIRHAM-simulated Indian summer monsoon circulation}},
url = {https://www.hindawi.com/journals/amete/2010/415632/},
volume = {2010},
year = {2010}
}
@article{Yang2012a,
annote = {land use change effects on evaporation},
author = {Yang, Xiaoli and Ren, Liliang and Singh, V and Liu, Xiaofan and Yuan, Fei and Jiang, Shanhu and Yong, Bin},
doi = {10.2166/nh.2011.120},
journal = {Hydrology Research},
number = {1-2},
pages = {23--37},
publisher = {IWA Publishing},
title = {{Impacts of land use and land cover changes on evapotranspiration and runoff at Shalamulun River watershed, China}},
url = {http://www.iwaponline.com/nh/043/nh0430023.htm},
volume = {43},
year = {2012}
}
@techreport{Alfnes2006,
author = {Alfnes, Eli and F{\o}rland, Eirik J},
booktitle = {Met.No Report},
pages = {1--40},
title = {{Trends in extreme precipitation and return values in Norway 1900-2004}},
url = {http://met.no/filestore/report02{\_}2006.pdf},
volume = {2},
year = {2006}
}
@article{Zhang2011a,
abstract = {Summary Extensive investigation was done on the changes in precipitation and streamflow in both space and time across China based on monthly precipitation data from 590 rainfall stations and on monthly streamflow data from 382 hydrological stations covering 1960{\^{a}}€“2000. Causes behind the precipitation changes were studied based on NCAR/NCEP reanalysis dataset. Influences of agricultural irrigation on availability and variability of water resources and related implications were also discussed. The results indicate that: (1) decreasing precipitation is found mainly in the regions between 105{\^{A}}°E and 115{\^{A}}°E and in the northeast China. Scarce precipitation is observed mainly in spring and autumn and winter seems to be wetter; (2) alterations of the East Asian monsoon activities should be the causes behind the spatial patterns of precipitation changes. Large-scale circulation of water vapor flux can well explain the spatial distribution of precipitation changes in China; (3) streamflow changes are mainly the results of precipitation changes. Agricultural irrigation heavily influences the variability and availability of water resources. Increasing water consumption due to booming socio-economy and fast growing population will further deteriorate the water status of China. In this sense, scientific and effective water resource management and advanced agricultural technology are urgently called for to ensure the sustainable socio-economy and social stability of China. },
annote = {MK trend analysis and sloep method to analyse the trend of precipitation and streamflow; China},
author = {Zhang, Qiang and Singh, V and Sun, Peng and Chen, Xi and Zhang, Zengxin and Li, Jianfeng},
doi = {10.1016/j.jhydrol.2011.09.017},
issn = {0022-1694},
journal = {Journal of Hydrology},
keywords = {Precipitation changes},
number = {3-4},
pages = {204--216},
title = {{Precipitation and streamflow changes in China: Changing patterns, causes and implications}},
url = {http://www.sciencedirect.com/science/article/pii/S0022169411006524},
volume = {410},
year = {2011}
}
@article{Benestad2009a,
author = {Benestad, Rasmus E.},
doi = {10.1007/s00704-009-0158-1},
issn = {0177-798X},
journal = {Theoretical and Applied Climatology},
month = {jul},
number = {1-2},
pages = {1--21},
title = {{Downscaling precipitation extremes}},
url = {http://link.springer.com/10.1007/s00704-009-0158-1},
volume = {100},
year = {2009}
}
@article{doi:10.1080/01431160903433893,
abstract = {The Himalayan basins have runoff contributions from rainfall as well as from snow and ice. In the present study a snowmelt runoff model (SRM) was applied to estimate the streamflow for Satluj basin located in the western Himalayan region. This model uses the direct input of remotely sensed snow-cover area (SCA) data for calibration and simulation. The SCA in the basin was determined using remote sensing data from the National Oceanic and Atmospheric Administration (NOAA) Advanced Very High Resolution Radiometer (AVHRR) and the Moderate Resolution Imaging Spectrometer (MODIS) onboard the Terra-Aqua satellite. In addition, daily precipitation and temperature data, as well as a Shuttle Radar Topography Mission digital elevation model (SRTM-DEM), were used to prepare the area elevation curves. The model was calibrated using the dataset for a period of 3 years (1996-1997, 1997?€“1998 and 1998?€“1999) and model parameters for streamflow routing were optimized. Using the optimized parameters, streamflow simulations were made for four years of data (i.e. 2000?€“2003 and 2004?€“2005). The accuracy of the streamflow verification was determined using different criteria such as shape of the outflow hydrograph, efficiency and difference in volume. The seasonal temperature lapse rates (TLRs) estimated from land surface temperature (LST) maps were used in the model and considerable improvement in simulation was observed. It was found that the overall efficiency increased when using varying TLRs.},
author = {Jain, Sanjay K and Goswami, Ajanta and Saraf, A K},
doi = {10.1080/01431160903433893},
journal = {International Journal of Remote Sensing},
number = {24},
pages = {6603--6618},
title = {{Snowmelt runoff modelling in a Himalayan basin with the aid of satellite data}},
url = {http://dx.doi.org/10.1080/01431160903433893},
volume = {31},
year = {2010}
}
@article{Perrin2001,
abstract = {Hydrological models must be reliable and robust as these qualities influence all applications based on model output. Previous studies on conceptual rainfall–runoff models have shown that one of the root causes of their output uncertainty is model over-parameterisation. The problem of poorly defined parameters has attracted much attention but has not yet been satisfactorily solved. We believe that the most fruitful way forward is to improve the structures where these parameters act. The main objective of this paper is to examine the role of complexity in hydrological models by studying the relation between the number of optimised parameters and model performance. An extensive comparative performance assessment of the structures of 19 daily lumped models was carried out on 429 catchments, mostly in France but also in the United States, Australia, the Ivory Coast and Brazil. Bulk treatment of the data showed that the complex models outperform the simple ones in calibration mode but not in verification mode. We argue that the main reason why complex models lack stability is that the structure, i.e. the way components are organised, is not suited to extracting information available in hydrological time-series. An inadequate complexity typically results in model over-parameterisation and parameter uncertainty. Although complexity has been used as a response to the challenge of predicting the hydrological effects of environmental changes, this study suggests that such models may have been developed with excessive confidence and that they could face difficulties of parameter estimation and structure validation when confronted with hydro-meteorological time-series. This comparative study indicates that some parsimonious models can yield promising results and should be further developed, although they are not able to tackle all types of problems, which would be the case if their complexity were ideally adapted.},
annote = {Previous studies on conceptual rainfall±runoff models have shown that one of the root causes of their output uncertainty is model overparameterisation; Bulk treatment of the data showed that the complex models outperform the simple ones in calibration mode but not in verification mode. Less parameter outperform.},
author = {Perrin, C and Michel, C and Andr{\'{e}}assian, V},
doi = {10.1016/S0022-1694(00)00393-0},
issn = {0022-1694},
journal = {Journal of Hydrology},
keywords = {Hydrology},
number = {3-4},
pages = {275--301},
title = {{Does a large number of parameters enhance model performance? Comparative assessment of common catchment model structures on 429 catchments}},
url = {http://www.sciencedirect.com/science/article/pii/S0022169400003930},
volume = {242},
year = {2001}
}
@article{Klok2002,
abstract = {To investigate the spatial distribution of the energy- and mass-balance fluxes of a glacier, a two-dimensional mass-balance model was developed and applied to Morteratschgletscher, Switzerland. The model is driven by meteorological input from four synoptic weather stations located in the vicinity of Morteratschgletscher. The model results were compared to observations made on the glacier. The calculated mean specific mass balance is -0.47 m w.e. for 1999, and 0.23 m w.e. for 2000. Net shortwave radiation shows a minimum at around 3350 m a.s.l., due to the effects of shading, slope, aspect, reflection from the slopes, and obstruction of the sky. Ignoring these effects results in a 37{\%} increase in the annual incoming shortwave radiation on the glacier, causing 0.34 m w.e. more ablation. A 1°C change in the air temperature results in a shift of 0.67 m w.e. in the mean specific mass balance, while altering the precipitation by 10{\%} causes a change of 0.17 m w.e.},
author = {Klok, E J Lisette and Oerlemans, Johannes},
doi = {10.3189/172756502781831133},
journal = {Journal of Glaciology},
number = {163},
pages = {505--518},
title = {{Model study of the spatial distribution of the energy and mass balance of Morteratschgletscher, Switzerland}},
url = {http://www.ingentaconnect.com/content/igsoc/jog/2002/00000048/00000163/art00003},
volume = {48},
year = {2002}
}
@article{Gaertner-Roer2014,
author = {G{\"{a}}rtner-Roer, I and Naegeli, K and Huss, Matthias and Knecht, T and Machguth, Horst and Zemp, Michael},
doi = {10.1016/j.gloplacha.2014.09.003},
journal = {Global and Planetary Change},
pages = {330--344},
publisher = {Elsevier},
title = {{A database of worldwide glacier thickness observations}},
url = {http://www.sciencedirect.com/science/article/pii/S0921818114001878},
volume = {122},
year = {2014}
}
@article{Bajracharya2014,
author = {Bajracharya, Samjwal Ratna and Maharjan, Sudan Bikash and Shrestha, Finu},
doi = {10.3189/2014AoG66A125},
issn = {02603055},
journal = {Annals of Glaciology},
month = {may},
number = {66},
pages = {159--166},
publisher = {International Glaciological Society},
title = {{The status and decadal change of glaciers in Bhutan from the 1980s to 2010 based on satellite data}},
url = {http://www.ingentaconnect.com/content/igsoc/agl/2014/00000055/00000066/art00019},
volume = {55},
year = {2014}
}
@article{Kaser2010,
abstract = {Although reliable figures are often missing, considerable detrimental changes due to shrinking glaciers are universally expected for water availability in river systems under the influence of ongoing global climate change. We estimate the contribution potential of seasonally delayed glacier melt water to total water availability in large river systems. We find that the seasonally delayed glacier contribution is largest where rivers enter seasonally arid regions and negligible in the lowlands of river basins governed by monsoon climates. By comparing monthly glacier melt contributions with population densities in different altitude bands within each river basin, we demonstrate that strong human dependence on glacier melt is not collocated with highest population densities in most basins.},
author = {Kaser, Georg and Gro{\ss}hauser, Martin and Marzeion, Ben},
doi = {10.1073/pnas.1008162107},
journal = {Proceedings of the National Academy of Sciences},
number = {47},
pages = {20223--20227},
title = {{Contribution potential of glaciers to water availability in different climate regimes}},
url = {http://www.pnas.org/content/early/2010/11/01/1008162107.abstract},
volume = {104},
year = {2010}
}
@article{Scanlon2015,
annote = {analysis the reasons for change rather only showing},
author = {Scanlon, Bridget R. and Zhang, Zizhan and Reedy, Robert C. and Pool, Donald R. and Save, Himanshu and Long, Di and Chen, Jianli and Wolock, David M. and Conway, Brian D. and Winester, Daniel},
doi = {10.1002/2015WR018090},
issn = {00431397},
journal = {Water Resources Research},
keywords = {GRACE},
mendeley-tags = {GRACE},
month = {dec},
pages = {n/a--n/a},
title = {{Hydrologic implications of GRACE satellite data in the Colorado River Basin}},
url = {http://doi.wiley.com/10.1002/2015WR018090},
year = {2015}
}
@article{Oerlemans2000,
author = {Oerlemans, J and Reichert, B K},
doi = {10.3189/172756500781833269},
journal = {Journal of Glaciology},
number = {152},
pages = {1--6},
publisher = {International Glaciological Society},
title = {{Relating glacier mass balance to meteorological data by using a seasonal sensitivity characteristic}},
url = {http://www.ingentaconnect.com/content/igsoc/jog/2000/00000046/00000152/art00001?token=005114e903cd5a666f3a7b6c42407b425520675d58763f49264f655d375c6b6876305021ad7307a4e},
volume = {46},
year = {2000}
}
@article{Easterling2000a,
annote = {global climate and different trend in heavy rain and annual rain},
author = {Easterling, David R and Evans, J L and Groisman, P Ya and Karl, T R and Kunkel, K E and Ambenje, P},
doi = {10.1175/1520-0477(2000)081<0417:OVATIE>2.3.CO;2},
journal = {Bulletin of the American Meteorological Society},
number = {3},
pages = {417--425},
title = {{Observed Variability and Trends in Extreme Climate Events: A Brief Review*}},
url = {http://dx.doi.org/10.1175/1520-0477(2000)081{\textless}0417:OVATIE{\textgreater}2.3.CO;2},
volume = {81},
year = {2000}
}
@article{sorg2012climate,
author = {Sorg, Annina and Bolch, Tobias and Stoffel, Markus and Solomina, Olga and Beniston, Martin},
doi = {10.5194/hess-11-468-2007},
journal = {Nature Climate Change},
number = {10},
pages = {725--731},
publisher = {Nature Publishing Group},
title = {{Climate change impacts on glaciers and runoff in Tien Shan (Central Asia)}},
url = {http://www.nature.com/nclimate/journal/v2/n10/full/nclimate1592.html},
volume = {2},
year = {2012}
}
@article{Bergstrom1983,
annote = {calibrated the HBV with the objective of groundwater storage and the correlation coefficient around 0.8-0.9 for six stations; different aquifer use uz or lz or combination},
author = {Bergstr{\"{o}}m, Sten and Sandberg, G{\"{o}}ran},
doi = {10.2166/nh.1983.007},
journal = {Nordic Hydrology},
number = {2},
pages = {71--84},
title = {{Simulation of Groundwater Response by Conceptual Models}},
url = {http://www.iwaponline.com/nh/014/nh0140071.htm},
volume = {14},
year = {1983}
}
@book{richards1998glacier,
author = {Richards, K S and Tranter, Martyn},
publisher = {Wiley},
title = {{Glacier hydrology and hydrochemistry}},
url = {http://eu.wiley.com/WileyCDA/WileyTitle/productCd-0471981680.html},
year = {1998}
}
@article{WRCR:WRCR6484,
author = {Kustas, William P and Rango, Albert and Uijlenhoet, Remko},
doi = {10.1029/94WR00152},
issn = {1944-7973},
journal = {Water Resources Research},
number = {5},
pages = {1515--1527},
title = {{A simple energy budget algorithm for the snowmelt runoff model}},
url = {http://dx.doi.org/10.1029/94WR00152},
volume = {30},
year = {1994}
}
@article{Bauer1972,
author = {Bauer, David F.},
journal = {Journal of the American Statistical Association},
number = {39},
pages = {687 -- 690},
title = {{Constructing Confidence Sets Using Rank Statistics on JSTOR}},
url = {http://www.jstor.org/stable/2284469?seq=1{\#}page{\_}scan{\_}tab{\_}contents},
volume = {67},
year = {1972}
}
@article{Arnell2004,
abstract = {In 1995, nearly 1400 million people lived in water-stressed watersheds (runoff less than 1000{\&}{\#}xa0;m3/capita/year), mostly in south west Asia, the Middle East and around the Mediterranean. This paper describes an assessment of the relative effect of climate change and population growth on future global and regional water resources stresses, using {\{}SRES{\}} socio-economic scenarios and climate projections made using six climate models driven by {\{}SRES{\}} emissions scenarios. River runoff was simulated at a spatial resolution of 0.5{\~{A}}—0.5{\^{A}}° under current and future climates using a macro-scale hydrological model, and aggregated to the watershed scale to estimate current and future water resource availability for 1300 watersheds and small islands under the {\{}SRES{\}} population projections. The {\{}A2{\}} storyline has the largest population, followed by B2, then {\{}A1{\}} and {\{}B1{\}} (which have the same population). In the absence of climate change, the future population in water-stressed watersheds depends on population scenario and by 2025 ranges from 2.9 to 3.3 billion people (36{\^{a}}€“40{\%} of the world's population). By 2055 5.6 billion people would live in water-stressed watersheds under the {\{}A2{\}} population future, and {\^{a}}€{\oe}only{\^{a}}€� 3.4 billion under A1/B1. Climate change increases water resources stresses in some parts of the world where runoff decreases, including around the Mediterranean, in parts of Europe, central and southern America, and southern Africa. In other water-stressed parts of the world{\^{a}}€��?particularly in southern and eastern Asia{\^{a}}€��?climate change increases runoff, but this may not be very beneficial in practice because the increases tend to come during the wet season and the extra water may not be available during the dry season. The broad geographic pattern of change is consistent between the six climate models, although there are differences of magnitude and direction of change in southern Asia. By the 2020s there is little clear difference in the magnitude of impact between population or emissions scenarios, but a large difference between different climate models: between 374 and 1661 million people are projected to experience an increase in water stress. By the 2050s there is still little difference between the emissions scenarios, but the different population assumptions have a clear effect. Under the {\{}A2{\}} population between 1092 and 2761 million people have an increase in stress; under the {\{}B2{\}} population the range is 670{\^{a}}€“1538 million, respectively. The range in estimates is due to the slightly different patterns of change projected by the different climate models. Sensitivity analysis showed that a 10{\%} variation in the population totals under a storyline could lead to variations in the numbers of people with an increase or decrease in stress of between 15{\%} and 20{\%}. The impact of these changes on actual water stresses will depend on how water resources are managed in the future. },
annote = {Climate Change; Sensitivity analysis showed that a 10{\%} variation in the population totals under a storyline could lead to variations in the numbers of people with an increase or decrease in stress of between 15{\%} and 20{\%}. The impact of these changes on actual water stresses will depend on how water resources are managed in the future; water resources based on discharge},
author = {Arnell, Nigel W},
doi = {10.1016/j.gloenvcha.2003.10.006},
issn = {0959-3780},
journal = {Global Environmental Change},
keywords = {Climate change impacts},
number = {1},
pages = {31--52},
title = {{Climate change and global water resources: SRES emissions and socio-economic scenarios}},
url = {http://www.sciencedirect.com/science/article/pii/S0959378003000803},
volume = {14},
year = {2004}
}
@article{Rechid2009,
author = {Rechid, Diana and Raddatz, ThomasJ. and Jacob, Daniela},
doi = {10.1007/s00704-008-0003-y},
issn = {0177-798X},
journal = {Theoretical and Applied Climatology},
number = {3-4},
pages = {245--255},
publisher = {Springer Vienna},
title = {{Parameterization of snow-free land surface albedo as a function of vegetation phenology based on MODIS data and applied in climate modelling}},
url = {http://dx.doi.org/10.1007/s00704-008-0003-y},
volume = {95},
year = {2009}
}
@techreport{Engen-Skaugen2005,
author = {Engen-Skaugen, Torill and Roald, Lars A. and Beldring, Stein and F{\o}rland, Eirik J. and Tveito, Ole Einar and Engeland, Kolbj{\o}rn and Benestad, Rasmus},
title = {{Climate change impacts on water balance in Norway}},
url = {http://met.no/filestore/01{\_}2005.pdf},
year = {2005}
}
@article{Gisnas2013,
author = {Gisn{\aa}s, K and Etzelm{\"{u}}ller, B and Farbrot, H and Schuler, T V and Westermann, S},
doi = {10.1002/ppp.1765},
issn = {1099-1530},
journal = {Permafrost and Periglacial Processes},
keywords = {Norway,climate change,equilibrium permafrost model,numerical model,permafrost},
number = {1},
pages = {2--19},
title = {{Cryo{\{}GRID{\}} 1.0: {\{}P{\}}ermafrost {\{}D{\}}istribution in {\{}N{\}}orway estimated by a {\{}S{\}}patial {\{}N{\}}umerical {\{}M{\}}odel}},
url = {http://dx.doi.org/10.1002/ppp.1765},
volume = {24},
year = {2013}
}
@article{Tiwari2011,
author = {Tiwari, Prakash Chandra and Joshi, Bhagwati},
doi = {10.1007/s11269-011-9825-y},
issn = {0920-4741},
journal = {Water Resources Management},
month = {may},
number = {4},
pages = {883--907},
title = {{Environmental Changes and Sustainable Development of Water Resources in the Himalayan Headwaters of India}},
url = {http://link.springer.com/10.1007/s11269-011-9825-y},
volume = {26},
year = {2011}
}
@article{Wang1991,
author = {Wang, Q J},
doi = {10.1029/91WR01305},
issn = {1944-7973},
journal = {Water Resources Research},
number = {9},
pages = {2467--2471},
title = {{The Genetic Algorithm and Its Application to Calibrating Conceptual Rainfall-Runoff Models}},
url = {http://dx.doi.org/10.1029/91WR01305},
volume = {27},
year = {1991}
}
@article{paolo2002modelling,
annote = {On the one hand, the complexity and intrinsically high variability of the involved processes as well as insufficient knowledge of the underlying physical mechanisms still induce large uncertainties in understanding observed phenomena and predicting the behaviour of the system. On the other hand, the demand for models that are able to simulate mountainous water resource systems is increasing because of the needs related to both water exploitation and water conservation, which clearly call for an integrated vision and modelling of these systems.},
author = {Burlando, Paolo and Pellicciotti, Francesca and Strasser, Ulrich},
doi = {10.2166/nh.2002.004},
journal = {Nordic Hydrology},
keywords = {Mountainous catchments},
number = {1},
pages = {47--74},
title = {{Modelling Mountainous Water Systems Between Learning and Speculating Looking for Challenges}},
url = {http://www.iwaponline.com/nh/033/nh0330047.htm},
volume = {33},
year = {2002}
}
@article{Refsgaard1996,
abstract = {A theoretical framework for model validation, based on the methodology originally proposed by Klemes [1985, 1986], is presented. It includes a hierarchial validation testing scheme for model application to runoff prediction in gauged and ungauged catchments subject to stationary and nonstationary climate conditions. A case study on validation and intercomparison of three different models on three catchments in Zimbabwe is described. The three models represent a lumped conceptual modeling system (NAM), a distributed physically based system (MIKE SHE), and an intermediate approach (WATBAL). It is concluded that all models performed equally well when at least 1 year's data were available for calibration, while the distributed models performed marginally better for cases where no calibration was allowed.},
annote = {The three models represent a lumped conceptual modeling system (NAM), a distributed physically based system (MIKE SHE), and an intermediate approach (WATBAL). It is concluded that all models performed equally well when at least 1 year's data were available for calibration, while the distributed models performed marginally better for cases where no calibration was allowed},
author = {Refsgaard, Jens Christian and Knudsen, Jesper},
doi = {10.1029/96WR00896},
issn = {1944-7973},
journal = {Water Resources Research},
number = {7},
pages = {2189--2202},
title = {{Operational Validation and Intercomparison of Different Types of Hydrological Models}},
url = {http://dx.doi.org/10.1029/96WR00896},
volume = {32},
year = {1996}
}
@article{Pechlivanidis2011,
annote = {Semi-distributed models have been suggested to combine the advantages of both types of spatial representation. This type of model does not pretend to represent a spatially continuous distribution of state variables; rather it discretises the catchment to a degree thought to be useful by the modeller using a set of lumped models. A semi-distributed model can therefore represent the important features of catchment, while at the same time requiring less data and lower computational costs than distributed models.
A popular objective function in the hydrological literature is the Nash-Sutcliffe Efficiency, NSE, criterion, which gives the proportion of the variance of the data explained by the model (Nash and Sutcliffe, 1970). Recent studies show that NSE is able to capture the time to peak and linear correlation with observed flow while underestimating the variability and mean of flows (Schaefli and Gupta, 2007; Gupta et al., 2009, Pechlivanidis et al., 2010a)},
author = {Pechlivanidis, I G and Jackson, B M and McIntyre, N R and Wheater, H S},
journal = {Global NEST Journal},
number = {3},
pages = {193--214},
title = {{Catchment scale hydrological modelling: a review of model types, calibration approaches and uncertainty analysis methods in the context of recent developments in technology and applications}},
url = {http://journal.gnest.org/sites/default/files/Journal Papers/193-214{\_}778{\_}Pechlivanidis{\_}13-3.pdf},
volume = {13},
year = {2011}
}
@article{Xu1999a,
author = {Xu, C.-Y.},
doi = {10.1177/030913339902300204},
journal = {Progress in Physical Geography},
number = {2},
pages = {229--249},
publisher = {Sage Publications},
title = {{From GCMs to river flow: a review of downscaling methods and hydrologic modelling approaches}},
volume = {23},
year = {1999}
}
@article{shrestha2012modeling,
author = {Shrestha, Maheswor and Wang, Lei and Koike, Toshio and Xue, Yongkang and Hirabayashi, Yukiko},
doi = {10.1175/JHM-D-10-05027.1},
journal = {Journal of Hydrometeorology},
number = {1},
pages = {204--222},
title = {{Modeling the spatial distribution of snow cover in the Dudhkoshi region of the Nepal Himalayas}},
url = {http://journals.ametsoc.org/doi/abs/10.1175/JHM-D-10-05027.1},
volume = {13},
year = {2012}
}
@article{Raje2011,
author = {Raje, Deepashree and Mujumdar, P P},
doi = {10.1002/hyp.8083},
issn = {1099-1085},
journal = {Hydrological Processes},
keywords = {Punjab,comparison,downscaling,monsoon,precipitation},
number = {23},
pages = {3575--3589},
publisher = {John Wiley {\&} Sons, Ltd.},
title = {{A comparison of three methods for downscaling daily precipitation in the Punjab region}},
url = {http://dx.doi.org/10.1002/hyp.8083},
volume = {25},
year = {2011}
}
@article{Pushpalatha2012,
annote = {in most of the existing criteria advised for low flows, high flows still make a significant contribution to the criterion's value. We therefore recommend using the Nash–Sutcliffe efficiency criterion calculated on inverse flow values, a valuable alternative to the classically used criteria},
author = {Pushpalatha, Raji and Perrin, Charles and Moine, Nicolas Le and Andr{\'{e}}assian, Vazken},
doi = {10.1016/j.jhydrol.2011.11.055},
issn = {0022-1694},
journal = {Journal of Hydrology},
keywords = {Low flows},
pages = {171--182},
title = {{A review of efficiency criteria suitable for evaluating low-flow simulations}},
url = {http://www.sciencedirect.com/science/article/pii/S0022169411008407},
volume = {420-421},
year = {2012}
}
@article{Schulze2000,
annote = {cliamte change and vegetation; climate change sensivity},
author = {Schulze, Roland E},
doi = {10.1579/0044-7447-29.1.12},
journal = {AMBIO: A Journal of the Human Environment},
number = {1},
pages = {12--22},
publisher = {JSTOR},
title = {{Modelling hydrological responses to land use and climate change: a southern African perspective}},
url = {http://dx.doi.org/10.1579/0044-7447-29.1.12},
volume = {29},
year = {2000}
}
@article{Hagg2006,
author = {Hagg, Wilfried and Braun, L N and Weber, M and Becht, M},
doi = {10.2166/nh.2006.001},
journal = {Nordic Hydrology},
number = {2},
pages = {93--105},
title = {{{\{}Runoff modelling in glacierized Central Asian catchments for present-day and future climate{\}}}},
url = {http://www.iwaponline.com/nh/037/nh0370093.htm},
volume = {37},
year = {2006}
}
@misc{WikiMWU2015,
author = {Wikipedia},
month = {apr},
title = {{Mann–Whitney U test}},
url = {http://en.wikipedia.org/wiki/Mann{\%}E2{\%}80{\%}93Whitney{\_}U{\_}test},
year = {2015}
}
@article{Anderson200823,
abstract = {Understanding the response of relatively small ice masses to climate change on a century-to-century timescale is important because of their significant contribution to sea level change in the recent past, and their likely contribution in the next century. Franz Josef Glacier, with its excellent terminus position record, location in the Southern Hemisphere, and its extreme sensitivity to climatic changes, is a key data point for understanding the magnitude and mechanisms of past and future climate changes. Here, we use a reconstructed mass balance record to drive an ice flow model which simulates the general retreat of the glacier during the 20th century. The model is then used to project future glacier variations, based on regionally downscaled climate change scenarios. The results indicate that, under a mean climate change scenario, the glacier will retreat 5{\^{A}} km and lose 38{\%} of its mass by 2100. Different scenarios give a range of recession from 3.9 to 6.4{\^{A}} km, and a range of volume loss from 26{\%} to 58{\%}. On a global scale, the magnitude of the retreat is at the upper end of the range calculated for other, similar sized, glaciers. },
author = {Anderson, Brian and Lawson, Wendy and Owens, Ian},
doi = {10.1016/j.gloplacha.2008.04.003},
issn = {0921-8181},
journal = {Global and Planetary Change},
keywords = {glacier},
number = {1},
pages = {23--30},
title = {{Response of Franz Josef Glacier Ka Roimata o Hine Hukatere to climate change}},
url = {http://www.sciencedirect.com/science/article/pii/S0921818108000428},
volume = {63},
year = {2008}
}
@article{vandeWal199429,
abstract = {This paper presents a comparison of measured ablation and calculated ablation based on an energy balance approach. The meteorological measurements for this study were conducted on the ice sheet in the S{\~{A}}¸ndre Str{\~{A}}¸mfjord area, West Greenland, during the 1990 and 1991 melt seasons as a part of the Greenland Ice Margin Experiment (GIMEX). The calculated ablation was used to force a model to predict proglacial meltwater runoff in the same area. Results are presented from a comparison between calculated and measured ablation as well as a comparison between measured and modelled discharge. },
annote = {Greenland ice margin experiment (GIMEx)},
author = {van de Wal, R S W and Russell, A J},
doi = {10.1016/0921-8181(94)90005-1},
issn = {0921-8181},
journal = {Global and Planetary Change},
number = {1-2},
pages = {29--38},
title = {{A comparison of energy balance calculations, measured ablation and meltwater runoff near S{\{}{\o}{\}}ndre Str{\{}{\o}{\}}mfjord, West Greenland}},
url = {http://www.sciencedirect.com/science/article/pii/0921818194900051},
volume = {9},
year = {1994}
}
@article{hock1999distributed,
author = {Hock, Regine},
journal = {Journal of Glaciology},
number = {149},
pages = {101--111},
publisher = {International Glaciological Society},
title = {{A distributed temperature-index ice-and snowmelt model including potential direct solar radiation}},
volume = {45},
year = {1999}
}
@article{Terzago2014,
author = {Terzago, Silvia and von Hardenberg, Jost and Palazzi, Elisa and Provenzale, Antonello},
doi = {10.1175/JHM-D-13-0196.1},
journal = {Journal of Hydrometeorology},
number = {6},
pages = {2293--2313},
title = {{Snowpack Changes in the Hindu Kush{\{}$\backslash$textemdash{\}}Karakoram{\{}$\backslash$textemdash{\}}Himalaya from CMIP5 Global Climate Models}},
url = {http://journals.ametsoc.org/doi/abs/10.1175/JHM-D-13-0196.1},
volume = {15},
year = {2014}
}
@article{Jones2006,
abstract = {Hydrological model sensitivity to climate change can be defined as the response of a particular hydrological model to a known quantum of climate change. This paper estimates the hydrological sensitivity, measured as the percentage change in mean annual runoff, of two lumped parameter rainfall-runoff models, {\{}SIMHYD{\}} and {\{}AWBM{\}} and an empirical model, Zhang01, to changes in rainfall and potential evaporation. These changes are estimated for 22 Australian catchments covering a range of climates, from cool temperate to tropical and moist to arid. The results show that the models display different sensitivities to both rainfall and potential evaporation changes. The SIMHYD, {\{}AWBM{\}} and Zhang01 models show mean sensitivities of 2.4{\%}, 2.5{\%} and 2.1{\%} change in mean annual flow for every 1{\%} change in mean annual rainfall, respectively. All rainfall sensitivities have a lower limit of 1.8{\%} and show upper limits of 4.1{\%}, 3.4{\%} and 2.5{\%}, respectively. The results for potential evaporation change are −0.5{\%}, −0.8{\%} and −1.0{\%} for every 1{\%} increase in mean annual potential evaporation, respectively, with changes rainfall being approximately 3–5 times more sensitive than changes in potential evaporation for each 1{\%} change in climate. Despite these differences, the results show similar correlations for several catchment characteristics. The most significant relationship is between percent change in annual rainfall and potential evaporation to the catchment runoff coefficient. The sensitivity of both A and B factors decreases with an increasing runoff coefficient, as does the uncertainty in this relationship. The results suggest that a first-order relationship can be used to give a rough estimate of changes in runoff using estimates of change in rainfall and potential evaporation representing small to modest changes in climate. Further work will develop these methods further, by investigating other regions and changes on the subannual scale.},
annote = {hydrological sensitivity in climate condition},
author = {Jones, Roger N and Chiew, Francis H S and Boughton, Walter C and Zhang, Lu},
doi = {10.1016/j.advwatres.2005.11.001},
issn = {0309-1708},
journal = {Advances in Water Resources},
keywords = {Climate change},
number = {10},
pages = {1419--1429},
title = {{Estimating the sensitivity of mean annual runoff to climate change using selected hydrological models}},
url = {http://www.sciencedirect.com/science/article/pii/S0309170805002654},
volume = {29},
year = {2006}
}
@article{Stahl2008,
annote = {HBV and ARR for glacier in British Columbia},
author = {Stahl, K and Moore, R D and Shea, J M and Hutchinson, D and Cannon, A J},
doi = {10.1029/2007WR005956},
issn = {1944-7973},
journal = {Water Resources Research},
keywords = {Glacier retreat,HBV,climate change,conceptual models,streamflow,volume-area scaling},
number = {2},
pages = {W02422},
title = {{Coupled modelling of glacier and streamflow response to future climate scenarios}},
url = {http://onlinelibrary.wiley.com/doi/10.1029/2007WR005956/abstract;jsessionid=7CBF7B036658850D80C5E5F49650A3D7.f03t02},
volume = {44},
year = {2008}
}
@article{Li2014a,
abstract = {Hydrological models are often used for studying the hydrological effects of climate change; however, stability of models' performance and parameter values under changing climate conditions has seldom been evaluated and compared. In this study, three widely used rainfall-runoff models, namely the SimHYD model, the HBV model and the Xin'anjiang model are evaluated on two catchments subject to changing climate conditions. Evaluation is carried out with respect to their stability in model performance and parameter values during different calibration periods. The results show that (1) stability of model performances and parameter values depends on model structures as well as climate of catchments, and the models with higher performance scores are more stable in changing conditions. (2) all the tested models perform better on the humid catchment than on the arid catchment, (3) parameter values are also more stable on the humid catchment than on the arid catchment, and (4) the differences of stability among models are somehow larger in terms of model efficiency than in model parameter values.},
author = {Li, Hong and Beldring, Stein and Xu, C.-Y.},
doi = {10.1080/02626667.2014.978333},
journal = {Hydrological Sciences Journal},
title = {{Stability of model performance and parameter values on two catchments facing changes in climatic conditions}},
url = {http://dx.doi.org/10.1080/02626667.2014.978333},
year = {2014}
}
@article{Engelhardt2014,
author = {Engelhardt, M. and Schuler, T. V. and Andreassen, L. M.},
doi = {10.5194/hess-18-511-2014},
issn = {1607-7938},
journal = {Hydrology and Earth System Sciences},
language = {English},
month = {feb},
number = {2},
pages = {511--523},
publisher = {Copernicus GmbH},
title = {{Contribution of snow and glacier melt to discharge for highly glacierised catchments in Norway}},
url = {http://www.hydrol-earth-syst-sci.net/18/511/2014/hess-18-511-2014.html},
volume = {18},
year = {2014}
}
@article{Montanari2013,
abstract = {Observation uncertainty is nowadays recognized as a serious issue undermining the reliability of hydrological studies. For instance, many recent contributions show that river flow observations are affected by errors that may reach 25{\%} even when state-of-the-art measurement techniques are adopted. Yet, there is still little guidance by the literature on the most appropriate modelling strategies to be adopted under observation uncertainty. We carried out a series of simulation experiments and explored how the selection of appropriate model complexity can help reduce the impact of observation uncertainty. We found that model structure plays a relevant role and, in particular, a description of the relevant physical processes that come into play can effectively contribute to limit the impact of data errors and therefore significantly reduce overall uncertainty. },
annote = {observation error problem},
author = {Montanari, Alberto and Baldassarre, Giuliano Di},
doi = {10.1016/j.advwatres.2012.09.007},
issn = {0309-1708},
journal = {Advances in Water Resources},
keywords = {Hydrology},
pages = {498--504},
title = {{Data errors and hydrological modelling: The role of model structure to propagate observation uncertainty}},
url = {http://www.sciencedirect.com/science/article/pii/S0309170812002540},
volume = {51},
year = {2013}
}
@article{seibert2003reliability,
annote = {HBV model to simulate peak flows for four swedish catchments, calibration on periods with small peaks and validating on periods with large peaks; the model performance deteriorate when making predictions for other periods than the calibration periods, and that the loss of performance increases the more the climate conditions in the prediction period differ from the conditions in the calibration period.},
author = {Seibert, Jan},
doi = {10.2166/nh.2003.028},
journal = {Nordic Hydrology},
number = {5},
pages = {477--492},
title = {{Reliability of model predictions outside calibration conditions}},
url = {http://www.iwaponline.com/nh/034/nh0340477.htm},
volume = {34},
year = {2003}
}
@article{Westra2007,
author = {Westra, Seth and Brown, Casey and Lall, Upmanu and Sharma, Ashish},
doi = {10.1029/2006WR005617},
issn = {00431397},
journal = {Water Resources Research},
month = {jun},
number = {6},
pages = {n/a--n/a},
title = {{Modeling multivariable hydrological series: Principal component analysis or independent component analysis?}},
url = {http://doi.wiley.com/10.1029/2006WR005617},
volume = {43},
year = {2007}
}
@article{Jouvet2009,
author = {Jouvet, Guillaume and Huss, Matthias and Blatter, Heinz and Picasso, Marco and Rappaz, Jacques},
doi = {10.1016/j.jcp.2009.05.033},
journal = {Journal of Computational Physics},
number = {17},
pages = {6426--6439},
publisher = {Elsevier},
title = {{Numerical simulation of Rhonegletscher from 1874 to 2100}},
url = {http://www.sciencedirect.com/science/article/pii/S002199910900285X},
volume = {228},
year = {2009}
}
@article{Bookhagen2006,
author = {Bookhagen, Bodo and Burbank, Douglas W.},
doi = {10.1029/2006GL026037},
file = {:C$\backslash$:/Users/holi/Downloads/Bookhagen{\_}et{\_}al-2006-Geophysical{\_}Research{\_}Letters.pdf:pdf},
issn = {0094-8276},
journal = {Geophysical Research Letters},
number = {8},
pages = {L08405},
title = {{Topography, relief, and TRMM-derived rainfall variations along the Himalaya}},
url = {http://doi.wiley.com/10.1029/2006GL026037},
volume = {33},
year = {2006}
}
@article{Seiller2014,
author = {Seiller, G and Anctil, F},
doi = {10.5194/hess-18-2033-2014},
journal = {Hydrology and Earth System Sciences},
number = {6},
pages = {2033--2047},
title = {{Climate change impacts on the hydrologic regime of a Canadian river: comparing uncertainties arising from climate natural variability and lumped hydrological model structures}},
url = {http://www.hydrol-earth-syst-sci.net/18/2033/2014/},
volume = {18},
year = {2014}
}
@article{Immerzeel2012,
abstract = {The analysis of climate change impact on the hydrology of high altitude glacierized catchments in the Himalayas is complex due to the high variability in climate, lack of data, large uncertainties in climate change projection and uncertainty about the response of glaciers. Therefore a high resolution combined cryospheric hydrological model was developed and calibrated that explicitly simulates glacier evolution and all major hydrological processes. The model was used to assess the future development of the glaciers and the runoff using an ensemble of downscaled climate model data in the Langtang catchment in Nepal. The analysis shows that both temperature and precipitation are projected to increase which results in a steady decline of the glacier area. The river flow is projected to increase significantly due to the increased precipitation and ice melt and the transition towards a rain river. Rain runoff and base flow will increase at the expense of glacier runoff. However, as the melt water peak coincides with the monsoon peak, no shifts in the hydrograph are expected.},
annote = {PEST calibration; glacier lubrication and hydrological model; runoff components},
author = {Immerzeel, Walter W and van Beek, L P H and Konz, M and Shrestha, A B and Bierkens, M F P},
doi = {10.1007/s10584-011-0143-4},
issn = {0165-0009},
journal = {Climatic Change},
number = {3-4},
pages = {721--736},
publisher = {Springer Netherlands},
title = {{Hydrological response to climate change in a glacierized catchment in the Himalayas}},
url = {http://link.springer.com/article/10.1007{\%}2Fs10584-011-0143-4},
volume = {110},
year = {2012}
}
@article{hess-20-3167-2016,
author = {Peng, J and Loew, A and Chen, X and Ma, Y and Su, Z},
doi = {10.5194/hess-20-3167-2016},
journal = {Hydrology and Earth System Sciences},
number = {8},
pages = {3167--3182},
title = {{Comparison of satellite-based evapotranspiration estimates over $\backslash$hack{\{}$\backslash$break{\}}the Tibetan Plateau}},
url = {http://www.hydrol-earth-syst-sci.net/20/3167/2016/},
volume = {20},
year = {2016}
}
@article{Schewe2014a,
abstract = {Water scarcity severely impairs food security and economic prosperity in many countries today. Expected future population changes will, in many countries as well as globally, increase the pressure on available water resources. On the supply side, renewable water resources will be affected by projected changes in precipitation patterns, temperature, and other climate variables. Here we use a large ensemble of global hydrological models (GHMs) forced by five global climate models and the latest greenhouse-gas concentration scenarios (Representative Concentration Pathways) to synthesize the current knowledge about climate change impacts on water resources. We show that climate change is likely to exacerbate regional and global water scarcity considerably. In particular, the ensemble average projects that a global warming of 2 °C above present (approximately 2.7 °C above preindustrial) will confront an additional approximate 15{\%} of the global population with a severe decrease in water resources and will increase the number of people living under absolute water scarcity ({\textless}500 m(3) per capita per year) by another 40{\%} (according to some models, more than 100{\%}) compared with the effect of population growth alone. For some indicators of moderate impacts, the steepest increase is seen between the present day and 2 °C, whereas indicators of very severe impacts increase unabated beyond 2 °C. At the same time, the study highlights large uncertainties associated with these estimates, with both global climate models and GHMs contributing to the spread. GHM uncertainty is particularly dominant in many regions affected by declining water resources, suggesting a high potential for improved water resource projections through hydrological model development.},
author = {Schewe, Jacob and Heinke, Jens and Gerten, Dieter and Haddeland, Ingjerd and Arnell, Nigel W and Clark, Douglas B and Dankers, Rutger and Eisner, Stephanie and Fekete, Bal{\'{a}}zs M and Col{\'{o}}n-Gonz{\'{a}}lez, Felipe J and Gosling, Simon N and Kim, Hyungjun and Liu, Xingcai and Masaki, Yoshimitsu and Portmann, Felix T and Satoh, Yusuke and Stacke, Tobias and Tang, Qiuhong and Wada, Yoshihide and Wisser, Dominik and Albrecht, Torsten and Frieler, Katja and Piontek, Franziska and Warszawski, Lila and Kabat, Pavel},
doi = {10.1073/pnas.1222460110},
issn = {1091-6490},
journal = {Proceedings of the National Academy of Sciences of the United States of America},
keywords = {Climate Change,Droughts,Droughts: statistics {\&} numerical data,Forecasting,Models, Theoretical,Population Growth,Temperature,Water Supply,Water Supply: statistics {\&} numerical data},
month = {mar},
number = {9},
pages = {3245--50},
pmid = {24344289},
title = {{Multimodel assessment of water scarcity under climate change.}},
url = {http://www.pnas.org/content/111/9/3245.full},
volume = {111},
year = {2014}
}
@article{Jakeman1993,
author = {Jakeman, A J and Hornberger, G M},
doi = {10.1029/93WR00877},
issn = {1944-7973},
journal = {Water Resources Research},
number = {8},
pages = {2637--2649},
title = {{How much complexity is warranted in a rainfall-runoff model?}},
url = {http://dx.doi.org/10.1029/93WR00877},
volume = {29},
year = {1993}
}
@article{WRCR:WRCR5593,
author = {Bl{\"{o}}schl, G and Kirnbauer, R and Gutknecht, D},
doi = {10.1029/91WR02250},
issn = {1944-7973},
journal = {Water Resources Research},
number = {12},
pages = {3171--3179},
title = {{Distributed Snowmelt Simulations in an Alpine Catchment: 1. Model Evaluation on the Basis of Snow Cover Patterns}},
url = {http://dx.doi.org/10.1029/91WR02250},
volume = {27},
year = {1991}
}
@misc{Hansen1998,
annote = {Hansen, M., R. DeFries, J.R.G. Townshend, and R. Sohlberg (1998), UMD Global Land Cover Classification, 1 Kilometer, 1.0, Department of Geography, University of Maryland, College Park, Maryland, 1981-1994.},
author = {Hansen, M and DeFries, R and Townshend, J R G and Sohlberg, R},
title = {{UMD Global Land Cover Classification, 1 Kilometer, 1.0}},
url = {http://glcf.umd.edu/data/landcover/},
year = {1998}
}
@article{Peel2011,
abstract = {Changing hydrological conditions due to climate, land use and infrastructure pose significant ongoing challenges to the hydrological research and water management communities. While, traditionally, hydrological models have assumed stationary conditions, there has been much progress since 2005 on model parameter estimation under unknown or changed conditions and on techniques for modelling in those conditions. There is an analogy between extrapolation in space (termed Prediction in Ungauged Basins, PUB), and extrapolation in time (termed Prediction in Ungauged Climates, PUC) that can be exploited for estimating model parameters. Methods for modelling changing hydrological conditions need to progress beyond the current scenario approach, which is reliant upon precalibrated models. Top-down methods and analysis of spatial gradients of a variable of interest, instead of temporal gradients (a method termed ‘Trading space for time') show much promise for validating more complex model projections. Understanding hydrological processes and how they respond to change, along with quantification of parameter estimation and modelling process uncertainty will continue to be active areas of research within hydrology. Contributions from these areas will not only help inform future climate change impact studies about what will change and by how much, but also provide insight into why any changes may occur, what changes we are able to predict in a realistic manner, and what changes are beyond the current predictability of hydrological systems.},
author = {Peel, Murray C and Bl{\"{o}}schl, G{\"{u}}nter},
doi = {10.1177/0309133311402550},
journal = {Progress in Physical Geography},
number = {2},
pages = {249--261},
title = {{Hydrological modelling in a changing world}},
url = {http://ppg.sagepub.com/content/35/2/249.abstract},
volume = {35},
year = {2011}
}
@article{Hagg2013,
abstract = {A conceptual hydrological model was set up in the upper Panj catchment, the main tributary of Amu-Darya river. After a manual calibration procedure involving model runs with different restrictions, the model reproduced both daily hydrographs of Tanimas river at the Rukhk gauging station (NSE=0.86) and the snow water equivalent of the Irkht station (R2=0.85) in a very satisfactory way. Based on two glacier inventories from the mid-20th century (WGI, World Glacier Inventory) and from 2003 (GLIMS, Global Land Ice Measurements from Space), a simple parameterization scheme based on steady state conditions was applied to infer the ice volumes and glacier areas for these different time periods. Assuming temperature rises of 2.2°C and 3.1°C, which mark the extreme values of regional climate scenarios, the same method was used to extrapolate glacierization to the year 2050. The results show that these temperature rises will reduce the current glacier extent of 431km2 by 36{\%} and 45{\%}, respectively. To assess future changes in water availability, the hydrological model input was modified according to the regional climate scenarios and the resulting glacier changes. The use of an elevation distributed deglacierization pattern is a clear improvement over methods used previously, where the impact on runoff was tested by excluding either the lower half or the total glacier area. The runoff scenarios reveal only a slight reduction in annual runoff, because the glacier area decrease is almost balanced out by enhanced melt rates. However, there is an important seasonal shift of water resources from summer to spring, unfavorably affecting agriculture and irrigation in the lowlands.},
author = {Hagg, Wilfried and Hoelzle, Martin and Wagner, Stephan and Mayr, Elisabeth and Klose, Zbynek},
doi = {10.1016/j.gloplacha.2013.05.005},
file = {::},
issn = {09218181},
journal = {Global and Planetary Change},
keywords = {Aral-Sea,Pamirs,glacier parameterization,hydrological model,runoff scenarios},
month = {nov},
pages = {62--73},
title = {{Glacier and runoff changes in the Rukhk catchment, upper Amu-Darya basin until 2050}},
url = {http://www.sciencedirect.com/science/article/pii/S0921818113001306},
volume = {110},
year = {2013}
}
@article{Tabari2011,
author = {Tabari, Hossein and Marofi, Safar},
doi = {10.1007/s11269-010-9689-6},
issn = {0920-4741},
journal = {Water Resources Management},
keywords = {Trend analysis; Temporal variations; Class A pan e},
number = {1},
pages = {97--111},
publisher = {Springer Netherlands},
title = {{Changes of Pan Evaporation in the West of Iran}},
url = {http://dx.doi.org/10.1007/s11269-010-9689-6},
volume = {25},
year = {2011}
}
@article{doi:10.3878/j.issn.1674-2834.13.0050,
abstract = { AbstractPrevious studies have shown that reanalysis products contain large uncertainties in the Tibetan Plateau (TP), and the biases are location dependent. Therefore, these products must be evaluated with in situ observations prior to their applications. In this study, the authors compare the results of several reanalysis projects with independent sounding observations recorded in the Yarlung Tsangpo River valley in the Eastern Himalayas in June 2010. These reanalysis projects include Climate Forecast System Reanalysis (CFSR), Interim European Centre for Medium Range Weather Forecasts Reanalysis (ERA-Interim), Japanese 25-year Reanalysis (JRA-25), Modern Era Retrospective Analysis for Research and Applications (MERRA), National Center for Environmental Prediction and the Department of Energy Reanalysis 2 (NCEP-R2), and NCEP Final Analysis (FNL). Statistical quantities such as average, mean bias (MB), root-mean-square difference (RMSD), and correlation coefficient (R) of temperature, specific humidity, u-wind, and v-wind between 100 hPa and 650 hPa were calculated. The authors determined that the performance of each product differed with variables at different levels. The average profiles of the variables were captured by the reanalysis products, with large biases appearing at lower levels. ERA-Interim and NCEP-R2 showed the best and worst performances, respectively, for all variables. This study suggests that users should select appropriate reanalysis products according to their specific purposes for TP research. },
author = {Jin-Huan, Zhu and Shu-Po, Ma and Han, Zou and Li-Bo, Zhou and Peng, Li},
doi = {10.3878/j.issn.1674-2834.13.0050},
file = {::},
journal = {Atmospheric and Oceanic Science Letters},
number = {1},
pages = {17--22},
title = {{Evaluation of Reanalysis Products with in situ GPS Sounding Observations in the Eastern Himalayas}},
url = {http://www.tandfonline.com/doi/abs/10.3878/j.issn.1674-2834.13.0050},
volume = {7},
year = {2014}
}
@article{Boyle2001,
author = {Boyle, Douglas P and Gupta, Hoshin V and Sorooshian, Soroosh and Koren, Victor and Zhang, Ziya and Smith, Michael},
doi = {10.1029/2000WR000207},
issn = {1944-7973},
journal = {Water Resources Research},
number = {11},
pages = {2749--2759},
title = {{Toward improved streamflow forecasts: value of semidistributed modeling}},
url = {http://dx.doi.org/10.1029/2000WR000207},
volume = {37},
year = {2001}
}
@article{Smakhtin2004,
author = {Smakhtin, Vladimir and Revenga, Carmen and D{\"{o}}ll, Petra},
doi = {10.1080/02508060408691785},
journal = {Water International},
number = {3},
pages = {307--317},
title = {{A Pilot Global Assessment of Environmental Water Requirements and Scarcity}},
url = {http://dx.doi.org/10.1080/02508060408691785},
volume = {29},
year = {2004}
}
@misc{Shaban2007,
author = {Shaban, Abdul and Sharma, R. N.},
title = {{Water Consumption Patterns in Domestic Households in Major Cities}},
url = {http://www.jstor.org/stable/4419690},
urldate = {2015-09-28},
year = {2007}
}
@article{Zeng2014,
annote = {Based on the hypothesis that the effects of human activities and climate change are two independent factors on runoff, these studies show that the impacts of climate change and human activities are vary in different basins and their impacts still need to be investigated for a local scale in a basin},
author = {Zeng, Sidong and Xia, Jun and Du, Hong},
doi = {10.1007/s00477-013-0760-8},
issn = {1436-3240},
journal = {Stochastic Environmental Research and Risk Assessment},
keywords = {Climate change; Human activities; Hydrological mod},
number = {2},
pages = {401--413},
publisher = {Springer Berlin Heidelberg},
title = {{Separating the effects of climate change and human activities on runoff over different time scales in the Zhang River basin}},
url = {http://dx.doi.org/10.1007/s00477-013-0760-8},
volume = {28},
year = {2014}
}
@techreport{Foerland1996,
annote = {complex precipitaion in Nordic countries and adjust methods and parameters},
author = {F{\o}rland, Eirik J and Allerup, Peter and Dahlstr{\"{o}}m, Bengt and Elomaa, Esko and J{\'{o}}nsson, Trausti and Madsen, Henning and Per{\"{a}}l{\"{a}}, Jaakko and Rissanen, Pauli and Vedin, Haldo and Vejen, Flemming},
institution = {Norwegian Meteorological Institute},
number = {24/96},
title = {{Manual for operational correction of Nordic precipitation data}},
year = {1996}
}
@article{Todini1988,
author = {Todini, E},
doi = {10.1016/0022-1694(88)90191-6},
issn = {0022-1694},
journal = {Journal of Hydrology},
number = {1-3},
pages = {341--352},
title = {{Rainfall-runoff modeling - Past, present and future}},
url = {http://www.sciencedirect.com/science/article/pii/0022169488901916},
volume = {100},
year = {1988}
}
@article{Drouet2015,
author = {Drouet, L and Bosetti, V and Tavoni, M},
journal = {Nature Climate Change},
keywords = {Drouet2015},
pages = {937----943},
title = {{Selection of climate policies under the uncertainties in the Fifth Assessment Report of the IPCC}},
url = {http://www.nature.com/nclimate/journal/vaop/ncurrent/full/nclimate2721.html},
volume = {5},
year = {2015}
}
@article{Radic2014,
abstract = {Changes in mass contained by mountain glaciers and ice caps can modify the Earth's hydrological cycle on multiple scales. On a global scale, the mass loss from glaciers contributes to sea-level rise. On regional and local scales, glacier meltwater is an important contributor to and modulator of river flow. In light of strongly accelerated worldwide glacier retreat, the associated glacier mass losses raise concerns over the sustainability of water supplies in many parts of the world. Here, we review recent attempts to quantify glacier mass changes and their effect on river runoff on regional and global scales. We find that glacier runoff is defined ambiguously in the literature, hampering direct comparison of findings on the importance of glacier contribution to runoff. Despite consensus on the hydrological implications to be expected from projected future warming, there is a pressing need for quantifying the associated regional-scale changes in glacier runoff and responses in different climate regimes.},
author = {Radi{\'{c}}, Valentina and Hock, Regine},
doi = {10.1007/s10712-013-9262-y},
issn = {0169-3298},
journal = {Surveys in Geophysics},
keywords = {Glaciers; Mass balance; Glacier runoff; Sea-level},
number = {3},
pages = {813--837},
publisher = {Springer Netherlands},
title = {{Glaciers in the Earth's Hydrological Cycle: Assessments of Glacier Mass and Runoff Changes on Global and Regional Scales}},
url = {http://dx.doi.org/10.1007/s10712-013-9262-y},
volume = {35},
year = {2014}
}
@article{Singh2005,
abstract = {The impact of warmer climate on melt and evaporation was studied for rainfed, snowfed and glacierfed basins located in the western Himalayan region. Hydrological processes were simulated under current climatic conditions using a conceptual hydrological model, which accounts for the rainfall-runoff, evaporation losses, snow and glacier melt. After simulations of daily observed streamflow (R2=0.90) for 6 years, the model was used to study the impact of warmer climate on melt and evaporation. Based on the future projected climatic scenarios in the study region, three temperature scenarios (T+1, T+2 and T+3{\&}{\#}xa0;{\^{A}}°C) were adopted for quantifying the effect of warmer climate. The comparison of the effect of warmer climate on different types of basins indicated that the increase in evaporation was the maximum for snowfed basins. For a T+2 {\^{A}}°C scenario, the annual evaporation for the rainfed basins increased by about 12{\%}, whereas for the snowfed basins it increased by about 24{\%}. The high increase of the evaporation losses would reduce the runoff. It was found that under a warmer climate, melt was reduced from snowfed basins, but increased from glacierfed basins. For a T+2 {\^{A}}°C scenario, annual melt was reduced by about 18{\%} for the studied snowfed basin, while it increased by about 33{\%} for the glacierfed basin. Thus, impact of warmer climate on the melt from the snowfed and glacierfed basins was opposite to each other. The study suggests that out of three types of basins, snowfed basins are more sensitive in terms of reduction in water availability due to a compound effect of increase in evaporation and decrease in melt. For a complex type of basin, the decrease in melt from seasonal snow may be counterbalanced by increase in melt from glaciers. However, on long-term basis, when the areal extent of glaciers will decrease due to higher melt rate, the water availability from the complex basins will be reduced. },
author = {Singh, Pratap and Bengtsson, Lars},
doi = {http://dx.doi.org/10.1016/j.jhydrol.2004.06.005},
issn = {0022-1694},
journal = {Journal of Hydrology},
keywords = {Rainfed basin},
number = {1-4},
pages = {140--154},
title = {{Impact of warmer climate on melt and evaporation for the rainfed, snowfed and glacierfed basins in the Himalayan region}},
url = {http://www.sciencedirect.com/science/article/pii/S0022169404002872},
volume = {300},
year = {2005}
}
@article{Kelems1986,
annote = {paremater calibration strategy; differential split sample test to verify the ability of a rainfall-runoff to simulate flows in a guaged basin under conditions different from tthose corresponding to the available observations.},
author = {Kleme{\v{s}}, V},
doi = {10.1080/02626668609491024},
journal = {Hydrological Sciences Journal},
number = {1},
pages = {13--24},
title = {{Operational testing of hydrological simulation models}},
url = {http://dx.doi.org/10.1080/02626668609491024},
volume = {31},
year = {1986}
}
@article{Frey2014,
author = {Frey, H and Machguth, H and Huss, M and Huggel, C and Bajracharya, S and Bolch, T and Kulkarni, A and Linsbauer, A and Salzmann, N and Stoffel, M},
doi = {10.5194/tc-8-2313-2014},
journal = {The Cryosphere},
number = {6},
pages = {2313--2333},
title = {{Estimating the volume of glaciers in the Himalayan{\{}$\backslash$textemdash{\}}Karakoram region using different methods}},
url = {http://www.the-cryosphere.net/8/2313/2014/},
volume = {8},
year = {2014}
}
@inproceedings{Li2013a,
author = {Li, H and Beldring, S and Xu, C.-Y.},
booktitle = {IAHS-AISH publication},
pages = {53--58},
publisher = {International Association of Hydrological Sciences},
title = {{Effects of distribution level of hydrological models in mountainous catchments}},
url = {http://iahs.info/uploads/dms/15545.360 53-58.pdf},
year = {2013}
}
@article{Beven2001,
author = {Beven, K.},
doi = {10.5194/hess-5-1-2001},
issn = {1607-7938},
journal = {Hydrology and Earth System Sciences},
keywords = {future of distributed hydrological model and nowad,related to alternative physically based models},
language = {English},
mendeley-tags = {future of distributed hydrological model and nowad,related to alternative physically based models},
number = {1},
pages = {1--12},
publisher = {Copernicus GmbH},
title = {{How far can we go in distributed hydrological modelling?}},
url = {http://www.hydrol-earth-syst-sci.net/5/1/2001/hess-5-1-2001.html},
volume = {5},
year = {2001}
}
@article{Carey2005122,
abstract = {Human populations worldwide are vulnerable to natural disasters. Certain conditionssuch as geographical location or people's income leve can affect the degree to which natural disasters impact people's homes and livelihoods. This paper suggests that vulnerability to natural disasters increases when local people, scientists, and policymakers do not communicate and trust each other. Additionally, a breakdown in interaction and confidence among these groups can disrupt the implementation of sound science or well-intentioned policies. This case study analyzes how local people, scientists, and government officials responded to glacier hazards in Peru's Cordillera Blanca mountain range. Cordillera Blanca glacier retreat since the late-19th century has triggered some of the world's most deadly avalanches and glacial lake outburst floods. Although a Peruvian glaciology and lakes security office has {\^{a}}€{\oe}controlled{\^{a}}€� 35 Cordillera Blanca glacial lakes, 30 glacier disasters have killed nearly 30,000 people in this region since 1941. A lack of local faith in government officials and scientists as well as the State's failure to follow scientists' warnings about potential disasters have endangered or led to the death of thousands of local residents, many of which remain living in hazard zones today. },
annote = {International Young Scientists' Global Change Conference 2003},
author = {Carey, Mark},
doi = {10.1016/j.gloplacha.2004.10.007},
issn = {0921-8181},
journal = {Global and Planetary Change},
keywords = {glacier retreat},
number = {2-4},
pages = {122--134},
title = {{Living and dying with glaciers: people's historical vulnerability to avalanches and outburst floods in Peru}},
url = {http://www.sciencedirect.com/science/article/pii/S0921818104001912},
volume = {47},
year = {2005}
}
@article{Tabari2011a,
author = {Tabari, Hossein and Talaee, P Hosseinzadeh},
doi = {10.1016/j.gloplacha.2011.07.008},
issn = {0921-8181},
journal = {Global and Planetary Change},
keywords = {climate variability},
number = {1-2},
pages = {1--10},
title = {{Analysis of trends in temperature data in arid and semi-arid regions of Iran}},
url = {http://www.sciencedirect.com/science/article/pii/S0921818111001202},
volume = {79},
year = {2011}
}
@article{hessd-11-8355-2014,
author = {Marshall, S J},
doi = {10.5194/hessd-11-8355-2014},
journal = {Hydrology and Earth System Sciences Discussions},
number = {7},
pages = {8355--8407},
title = {{Meltwater runoff from Haig Glacier, Canadian Rocky Mountains, 2002{\{}$\backslash$textendash{\}}2013}},
url = {http://www.hydrol-earth-syst-sci-discuss.net/11/8355/2014/},
volume = {11},
year = {2014}
}
@article{Crow2010,
author = {Crow, W. T. and van den Berg, M. J.},
doi = {10.1029/2010WR009402},
issn = {00431397},
journal = {Water Resources Research},
month = {dec},
number = {12},
pages = {n/a--n/a},
title = {{An improved approach for estimating observation and model error parameters in soil moisture data assimilation}},
url = {http://doi.wiley.com/10.1029/2010WR009402},
volume = {46},
year = {2010}
}
@article{AIZEN1993,
annote = {glacier melting based on runoff and no calibration},
author = {AIZEN, V. B. and AIZEN, E. M.},
month = {jan},
title = {{Glacier Runoff Estimation and Simulation of Streamflow in the Peripheral Territory of Central Asia}},
url = {https://www.researchgate.net/publication/242365864{\_}Glacier{\_}Runoff{\_}Estimation{\_}and{\_}Simulation{\_}of{\_}Streamflow{\_}in{\_}the{\_}Peripheral{\_}Territory{\_}of{\_}Central{\_}Asia},
volume = {218},
year = {1993}
}
@article{Nash1970,
abstract = {The principles governing the application of the conceptual model technique to river flow forecasting are discussed. The necessity for a systematic approach to the development and testing of the model is explained and some preliminary ideas suggested.},
author = {Nash, J E and Sutcliffe, J V},
doi = {10.1016/0022-1694(70)90255-6},
issn = {0022-1694},
journal = {Journal of Hydrology},
number = {3},
pages = {282--290},
title = {{River flow forecasting through conceptual models part I {\{}$\backslash$textemdash{\}} A discussion of principles}},
url = {http://www.sciencedirect.com/science/article/pii/0022169470902556},
volume = {10},
year = {1970}
}
@article{Dimri2013a,
author = {Dimri, A. P. and Niyogi, D.},
doi = {10.1002/joc.3584},
issn = {08998418},
journal = {International Journal of Climatology},
month = {jul},
number = {9},
pages = {2185--2205},
title = {{Regional climate model application at subgrid scale on Indian winter monsoon over the western Himalayas}},
url = {http://doi.wiley.com/10.1002/joc.3584},
volume = {33},
year = {2013}
}
@article{Todini2007a,
annote = {history of hydrological models and uncertanity in parameters},
author = {Todini, E},
doi = {10.5194/hess-11-468-2007},
journal = {Hydrology and Earth System Sciences},
number = {1},
pages = {468--482},
title = {{Hydrological catchment modelling: past, present and future}},
url = {http://www.hydrol-earth-syst-sci.net/11/468/2007/},
volume = {11},
year = {2007}
}
@misc{Joshi2008,
author = {Joshi, Govinda},
title = {{Major River Systems of Hindu Kush Himalayan (HKH) Region}},
url = {http://rds.icimod.org/Home/DataDetail?metadataId=2956{\&}searchlist=True},
year = {2008}
}
@article{Wilcox1996,
author = {Wilcox, Rand R},
doi = {10.1080/03610929608831766},
journal = {Communications in Statistics - Theory and Methods},
number = {6},
pages = {1305--1324},
title = {{Estimation in the simple linear regression model when there is heteroscedasticity of unknown form}},
url = {http://www.tandfonline.com/doi/abs/10.1080/03610929608831766{\#}.VOSL9vnF{\_}gB},
volume = {25},
year = {1996}
}
@article{Gupta1982,
abstract = {Snowmelt may substantially contribute to the overall discharge of a river and hence is the importance of estimating snowmelt runoff. The River Beas, in the northwestern part of India, was chosen to study the relation between snow-cover area and snowmelt runoff. Snow-cover area was mapped from the {\{}LANDSAT{\}} images for a number of years in various subcatchments. The river discharge, excess over the baseflow, in days of non-concurrent rain-precipitation, was computed which could be attributed to snowmelt alone. The snow-cover area and the subsequent snowmelt runoff in various subcatchments are found to be well correlated. It is interpreted that there have been years of uniformly heavier and lighter snowfall all over the basin and the snowmelt discharges have consequently systematically varied. For a particular subcatchment, the relationship between snow-cover area and snowmelt runoff seems to be independent of geographic factors like solar illumination, catchment orientation and relative location. On the other hand, it appears to depend on geomorphical factors such as size of the subcatchment, permanent snow-cover area, average altitude, lithology and stream order. Hence, it is considered that, for each type of geomorphical subcatchment, a different empirical relation should exist between snow-cover area and snowmelt runoff.},
annote = {the snow melt contributed is from the discharge excess over baseflow in non-concurrent rain-precipitation; beas river basin; necessary to define hydrological year; nowmelt may substantially contribute to the overall discharge of a river and hence is the importance of estimating snowmelt runoff. The River Beas, in the northwestern part of India, was chosen to study the relation between snow-cover area and snowmelt runoff.},
author = {Gupta, R P and Duggal, A J and Rao, S N and Sankar, G and Singhal, B B S},
doi = {10.1016/0022-1694(82)90042-7},
issn = {0022-1694},
journal = {Journal of Hydrology},
number = {3-4},
pages = {325--339},
title = {{Snow-cover area vs. snowmelt runoff relation and its dependence on geomorphology?{\{}$\backslash$textemdash{\}}A study from the Beas catchment (Himalayas, India)}},
url = {http://www.sciencedirect.com/science/article/pii/0022169482900427},
volume = {58},
year = {1982}
}
@article{Beldring1999,
abstract = {This study is a contribution to the northern hemisphere climate processes land surface experiment (NOPEX). Its purpose is to investigate the spatial variability of groundwater levels and soil moisture content at different scales in a landscape dominated by boreal forest and till soils, which is characteristic of the Nordic countries. The analysis of data from the {\{}NOPEX{\}} area are based on a review of previous studies on the spatial distribution of these state variables and their significance for runoff formation. Soil moisture content in the unsaturated zone and depth to the groundwater table show characteristic patterns which are related to the landscape elements (patches) of the drainage basins. Similar behaviour is observed in different parts of the {\{}NOPEX{\}} region. The variability of average values between areas decreases to a minimum for catchments with size larger than 1{\&}{\#}xa0;km2. It can therefore be concluded that the main part of the spatial variability of soil moisture content and depth to the groundwater level in the till soils of the {\{}NOPEX{\}} area is found within small drainage basins. Based on a physical description of the soil, distribution functions of soil moisture content conditioned on the depth to the groundwater table have been developed, both for the patch scale and the catchment scale.},
annote = {groundwater and soil moisture cannot be compared to the model simulated results for the scale analysis},
author = {Beldring, S and Gottschalk, L and Seibert, J and Tallaksen, L},
doi = {10.1016/S0168-1923(99)00103-3},
issn = {0168-1923},
journal = {Agricultural and Forest Meteorology},
keywords = {Till},
pages = {305--324},
title = {{Distribution of soil moisture and groundwater levels at patch and catchment scales}},
url = {http://www.sciencedirect.com/science/article/pii/S0168192399001033},
volume = {98-99},
year = {1999}
}
@article{Kizza2013,
annote = {regionalisation methods for parameter transfer; regionlisation, proxy basin and global mean are used; for ungauged area},
author = {Kizza, Michael and Guerrero, Jose-Luis and Rodhe, Allan and Xu, C.-Y. and Ntale, Henry K},
doi = {10.2166/nh.2012.152},
journal = {Hydrology Research},
number = {5},
pages = {789--808},
publisher = {IWA Publishing},
title = {{Modelling catchment inflows into Lake Victoria: regionalisation of the parameters of a conceptual water balance model}},
url = {http://www.iwaponline.com/nh/044/nh0440789.htm},
volume = {44},
year = {2013}
}
@article{vormoor2013temporal,
author = {Vormoor, Klaus and Skaugen, Thomas},
doi = {10.1175/JHM-D-12-0139.1},
journal = {Journal of Hydrometeorology},
number = {3},
pages = {989--999},
title = {{Temporal Disaggregation of Daily Temperature and Precipitation Grid Data for Norway}},
url = {http://journals.ametsoc.org/doi/abs/10.1175/JHM-D-12-0139.1},
volume = {14},
year = {2013}
}
@article{REN2017148,
abstract = {Abstract In this paper, we analyzed the long-term changes in temperature and precipitation in the Hindu Kush Himalayan (HKH) region based on climate datasets LSAT-V1.1 and CGP1.0 recently developed by the China Meteorological Administration. The analysis results show that during 1901–2014 the annual mean surface air temperature over the whole HKH has undergone a significant increasing trend. We determined the change rates in the mean temperature, mean maximum temperature, and mean minimum temperature to be 0.104°C per decade, 0.077°C per decade, and 0.176°C per decade, respectively. Most parts of the HKH have experienced a warming trend, with the largest increase occurring on the Tibetan Plateau (TP) and south of Pakistan. The trend of precipitation for the whole HKH is characterized by a slight decrease during 1901–2014. During 1961–2013, however, the trend of the annual precipitation shows a statistically significant increase, with a rate of 5.28{\%} per decade and has a more rapid increase since the mid-1980s. Most parts of northern India and the northern TP have experienced a strong increase in the number of precipitation days (daily rainfall ≥1mm), whereas Southwest China and Myanmar have experienced a declining trend in precipitation days. Compared to the trends in precipitation days, the spatial pattern of trends in the precipitation intensity seems to be more closely related to the terrain, and the higher altitude areas have shown more significant upward trends in precipitation intensity during 1961–2013.},
annote = {Including special issue on climate change in the Hindu Kush Himalaya},
author = {Ren, Yu-Yu and Ren, Guo-Yu and Sun, Xiu-Bao and Shrestha, Arun Bhakta and You, Qing-Long and Zhan, Yun-Jian and Rajbhandari, Rupak and Zhang, Pan-Feng and Wen, Kang-Min},
doi = {https://doi.org/10.1016/j.accre.2017.08.001},
issn = {1674-9278},
journal = {Advances in Climate Change Research},
keywords = { Hindu Kush Himalayan, Precipitation, Temperature, Tibetan Plateau, Trend,Climate change},
number = {3},
pages = {148--156},
title = {{Observed changes in surface air temperature and precipitation in the Hindu Kush Himalayan region over the last 100-plus years}},
url = {http://www.sciencedirect.com/science/article/pii/S1674927817300254},
volume = {8},
year = {2017}
}


@article{KUMAR2007,
abstract = {Abstract The water balance approach was used to estimate the average contribution of snow- and glacier-melt runoff in the annual flow of the Beas River at Pandoh Dam. About 45{\%} of the basin area is covered by snow during winter and about 15{\%} remains covered by perpetual snow and glaciers. Snowand glacier-melt contribution was estimated by computing the other components, i.e. rainfall, runoff and losses through evaporation, of the water balance equation. The total water budget of the basin was calculated for a period of 15 years (1990-2004). Total rainfall input to the basin was computed using available records of rainfall. The total volume of flow for the above-mentioned period was computed using measured discharge data of the Beas River at Pandoh Dam. Evapotranspiration losses from the basin were estimated only from the snow-free area, considering evaporation losses from the snowcovered area as negligible. The results of the analysis show that the snow- and glacier-melt runoff contributes about 35{\%} to the annual flow of the Beas River at Pandoh Dam.},
annote = {multi-year average monthly pan evaporation, runoff and rainfall trend; The water balance approach was used to estimate the average contribution of snow- and glacier-melt runoff in the annual flow of the Beas River at Pandoh Dam. About 45{\%} of the basin area is covered by snow during winter and about 15{\%} remains covered by perpetual snow and glaciers. Snowand glacier-melt contribution was estimated by computing the other components, i.e. rainfall, runoff and losses through evaporation, of the water balance equation. Fig 2},
author = {Kumar, VIJAY and Singh, PRATAP and Singh, VIVEKANAND},
doi = {10.1623/hysj.52.2.376},
journal = {Hydrological Sciences Journal},
number = {2},
pages = {376--388},
title = {{Snow and glacier melt contribution in the Beas River at Pandoh Dam, Himachal Pradesh, India}},
url = {http://dx.doi.org/10.1623/hysj.52.2.376},
volume = {52},
year = {2007}
}
@article{Milly2008,
author = {Milly, P C D and Betancourt, Julio and Falkenmark, Malin and Hirsch, Robert M and Kundzewicz, Zbigniew W and Lettenmaier, Dennis P and Stouffer, Ronald J},
doi = {10.1126/science.1151915},
journal = {Science},
number = {5863},
pages = {573--574},
title = {{Stationarity Is Dead: Whither Water Management?}},
url = {http://www.sciencemag.org/content/319/5863/573.short},
volume = {319},
year = {2008}
}
@article{Jost2012,
author = {Jost, G and Moore, R D and Menounos, B and Wheate, R},
doi = {10.5194/hess-16-849-2012},
journal = {Hydrology and Earth System Sciences},
number = {3},
pages = {849--860},
title = {{Quantifying the contribution of glacier runoff to streamflow in the upper Columbia River Basin, Canada}},
url = {http://www.hydrol-earth-syst-sci.net/16/849/2012/},
volume = {16},
year = {2012}
}
@article{Arendt19072002,
abstract = {We have used airborne laser altimetry to estimate volume changes of 67 glaciers in Alaska from the mid-1950s to the mid-1990s. The average rate of thickness change of these glaciers was –0.52 m/year. Extrapolation to all glaciers in Alaska yields an estimated total annual volume change of –52 ± 15 km3/year (water equivalent), equivalent to a rise in sea level (SLE) of 0.14 ± 0.04 mm/year. Repeat measurements of 28 glaciers from the mid-1990s to 2000–2001 suggest an increased average rate of thinning, –1.8 m/year. This leads to an extrapolated annual volume loss from Alaska glaciers equal to –96 ± 35 km3/year, or 0.27 ± 0.10 mm/year SLE, during the past decade. These recent losses are nearly double the estimated annual loss from the entire Greenland Ice Sheet during the same time period and are much higher than previously published loss estimates for Alaska glaciers. They form the largest glaciological contribution to rising sea level yet measured.},
author = {Arendt, Anthony A and Echelmeyer, Keith A and Harrison, William D and Lingle, Craig S and Valentine, Virginia B},
doi = {10.1126/science.1072497},
journal = {Science},
number = {5580},
pages = {382--386},
title = {{Rapid Wastage of Alaska Glaciers and Their Contribution to Rising Sea Level}},
url = {http://www.sciencemag.org/content/297/5580/382.abstract},
volume = {297},
year = {2002}
}
@article{Tramblay2013,
abstract = {In the framework of the international CORDEX program, new regional climate model (RCM) simulations at high spatial resolutions are becoming available for the Mediterranean region (Med-CORDEX initiative). This study provides the first evaluation for hydrological impact studies of one of these high-resolution simulations in a 1800 km2 catchment located in North Morocco. Different approaches are compared to analyze the climate change impacts on the hydrology of this catchment using a high-resolution RCM (ALADIN-Climate) from the Med-CORDEX initiative at two different spatial resolutions (50 and 12 km) and for two different Radiative Concentration Pathway scenarios (RCP4.5 and RCP8.5). The main issues addressed in the present study are: (i) what is the impact of increased RCM resolution on present-climate hydrological simulations and on future projections? (ii) Are the bias-correction of the RCM model and the parameters of the hydrological model stationary and transferable to different climatic conditions? (iii) What is the climate and hydrological change signal based on the new Radiative Concentration Pathways scenarios (RCP4.5 and RCP8.5)? Results indicate that high resolution simulations at 12 km better reproduce the seasonal patterns, the seasonal distributions and the extreme events of precipitation. The parameters of the hydrological model, calibrated to reproduce runoff at the monthly time step over the 1984–2010 period, do not show a strong variability between dry and wet calibration periods in a differential split-sample test. However the bias correction of precipitation by quantile-matching does not give satisfactory results in validation using the same differential split-sample testing method. Therefore a quantile-perturbation method that does not rely on any stationarity assumption and produces ensembles of perturbed series of precipitation was introduced. The climate change signal under scenarios 4.5 and 8.5 indicates a decrease of respectively −30 to −57{\%} in surface runoff for the mid-term (2041–2062), when for the same period the projections for precipitation are ranging between −15 and −19{\%} and for temperature between +1.3 and +1.9 °C.},
author = {Tramblay, Y and Ruelland, D and Somot, S and Bouaicha, R and Servat, E},
doi = {10.5194/hess-17-3721-2013},
journal = {Hydrology and Earth System Sciences},
number = {10},
pages = {3721--3739},
title = {{High-resolution Med-CORDEX regional climate model simulations for hydrological impact studies: a first evaluation of the ALADIN-Climate model in Morocco}},
url = {http://www.hydrol-earth-syst-sci.net/17/3721/2013/},
volume = {17},
year = {2013}
}
@article{liston2006distributed,
author = {Liston, Glen E and Elder, Kelly},
doi = {10.1175/JHM548.1},
journal = {Journal of Hydrometeorology},
keywords = {Snow,Snow depth,Sublimation; ice; melt},
number = {6},
pages = {1259--1276},
title = {{A distributed snow-evolution modeling system (SnowModel)}},
url = {http://journals.ametsoc.org/doi/full/10.1175/JHM548.1},
volume = {7},
year = {2006}
}
@article{Zhao2010,
abstract = {{\textless}p{\textgreater}In general, China is short of water resources and some regions even experience a shortage of daily water supply. This could threaten the stability and economic development of the nation. A study on the water storage variations is especially important for the water management and storage prediction in three largest river basins of China, namely, Yangtze, Yellow, and Zhujiang, where the most dense population and leading economic regions are located. The satellite gravity mission GRACE (Gravity Recovery and Climate Experiment) provides an opportunity to macroscopically identify water (or mass) variations in the Earth's system with a spatial resolution of 300–400 km and a temporal resolution of about one month. We use the first release of the DEOS (Delft Institute of Earth Observation and Space Systems) Mass Transport (DMT-1) model based on GRACE data to analyze water storage changes in the three river basins. The DMT-1 model consists of monthly solutions, which are computed using an innovative methodology. The methodology includes, in particular, the application of a statistically optimal Wiener-type filter based on full variance-covariance matrices of noise and signal. This results in particularly sharp mass variation maps. Taking one monthly solution as an example, we compare the results derived from the DMT-1 model with ones produced with the standard post-processing scheme based on a combination of the de-striping and Gaussian filtering. The comparison shows that the DMT-1 model outperforms the other models and is suitable for the analysis of the mass changes in river basins. A subset of the DMT-1 solutions in the interval between February 2003 and May 2008 is used to estimate the secular trends and seasonal variations for the three river basins. The estimated trends show that the water storage of the Yellow River basin does not have significant changes, while the Zhujiang and Yangtze river basins have a large and statistically significant water storage increase. The estimation of seasonal variations demonstrates that the water storage variations in Yangtze and Zhujiang river basins are almost in the same phase. The amplitude of variations in the Zhujiang River basin is larger than that in Yangtze. No clear annual variations are observed in the Yellow River basin. The observed water storage variations generally coincide with the observations and conclusions presented in the hydrological reports of the Chinese Ministry of Water Resources.{\textless}/p{\textgreater}},
author = {Zhao, QiLe and Liu, XiangLin and Ditmar, Pavel and Siemes, Christian and Revtova, Elena and Hashemi-Farahani, Hassan and Klees, Roland},
doi = {10.1007/s11430-010-4096-7},
issn = {1674-7313},
journal = {Science China Earth Sciences},
language = {cn},
month = {dec},
number = {5},
pages = {667--677},
title = {{Water storage variations of the Yangtze, Yellow, and Zhujiang river basins derived from the DEOS Mass Transport (DMT-1) model}},
url = {http://earth.scichina.com:8080/sciDe/CN/abstract/abstract502799.shtml},
volume = {54},
year = {2010}
}
@article{Hasson2014,
abstract = {Our results show a decreasing tendency for the annual average snow cover for the westerlies-influenced basins (upper Indus basin (UIB), Astore, Hunza, Shigar and Shyok) and an increasing tendency for the monsoon-influenced basins (Jhelum, Kabul, Swat and Gilgit). Seasonal average snow cover decreases during winter and autumn, and increases during spring and summer, which is consistent with the observed cooling and warming trends during the respective seasons. Sub-basins at relatively higher latitudes/altitudes show higher variability than basins at lower latitudes/middle altitudes.},
author = {Hasson, S and Lucarini, V and Khan, M R and Petitta, M and Bolch, T and Gioli, G},
doi = {10.5194/hess-18-4077-2014},
journal = {Hydrology and Earth System Sciences},
number = {10},
pages = {4077--4100},
title = {{Early 21st century snow cover state over the western river basins of the Indus River system}},
url = {http://www.hydrol-earth-syst-sci.net/18/4077/2014/},
volume = {18},
year = {2014}
}
@misc{EROS,
author = {EROS},
title = {{HYDRO1k Elevation Derivative Database}},
url = {https://lta.cr.usgs.gov/HYDRO1K}
}
@article{Lavabre1993,
abstract = {This paper presents the results of a study of the hydrological consequences of a wildfire in a small Mediterranean basin during the first 12 months after the event. The Rimbaad basin is a nested sub-basin of the Ral Collobrier research and experimental network, which has been continuously monitored since 1967. In August 1990, 85{\%} of its surface area was burnt providing an interesting case study to analyse the hydrological consequences of fire. Models have been calibrated using a 23 year period before the fire and they have been used to simulate what the response would have been if the wildfire had not taken place. Differences between observed and simulated data are analysed, giving special importance to the changes in the annual runoff yield and in the flood regimes. There is a 30{\%} increase in the annual runoff yield related to the reduction in evapotranspiration due to the destruction of the vegetation cover. On the other hand, there are pronounced changes in the shape of the flood hydrographs, and the flood frequency is greatly increased. The 10-year return period flow estimated before the fire was exceeded three times in the year although the rainfall events did not exceed the 1-year return period 12 h rainfall. The quantity and quality of the data collected during the pre-fire period and the possibility of comparing the hydrological responses of similar basins differently affected by fire, give a special relevance to this case study.},
author = {Lavabre, Jacques and Torres, Daniel Sempere and Cernesson, Flavy},
doi = {10.1016/0022-1694(93)90014-Z},
issn = {0022-1694},
journal = {Journal of Hydrology},
number = {1-4},
pages = {273--299},
title = {{Changes in the hydrological response of a small Mediterranean basin a year after a wildfire}},
url = {http://www.sciencedirect.com/science/article/pii/002216949390014Z},
volume = {142},
year = {1993}
}
@misc{SMHI2011,
author = {SMHI},
month = {feb},
title = {{Rossby Centre regional atmospheric model, RCA4}},
url = {http://www.smhi.se/en/research/research-departments/climate-research-rossby-centre2-552/rossby-centre-regional-atmospheric-model-rca4-1.16562},
year = {2015}
}
@article{Xu1999,
abstract = {The ability of water balance models to incorporate month–month or seasonal variations in climate, snowfall and snowmelt, groundwater fluctuations, soil moisture characteristics, and natural climatic variability makes them especially attractive for water resources studies of climatic changes. The use of conceptual models to explore the impact of climate changes has increased in recent years. Because of the success claimed for these studies, it is likely that computer simulation of catchments will increasingly be used by and for water resource managers as an aid to decision-making. There is therefore a need for a generally accepted method for demonstrating a model's fitness for such use. The simple split-sample test method may be reasonable in the simplest case of the ‘filling-in missing data' problem but certainly not if the express purpose of the model is to simulate records for conditions different from those corresponding to the calibration record, such as the problem with predicting the effects of climate changes where the data on the changed system are not (and cannot be) available for comparison with the model predictions. Thus, model validation must demonstrate ‘fitness for the said purpose'. In this paper, available model validation methods are reviewed and the hierarchical scheme for systematic testing of hydrological simulation models according to the modelling tasks, proposed by Klemes (1986) (Klemes, V., 1986. Hydrol. Sci. J. 31, 13–24) is discussed in detail and exemplified using the NOPEX water balance model (Xu, C.-Y., Seibert, J., Halldin, S., 1996. J. Hydrol. 180, 211–236) and NOPEX data.},
annote = {monthly model model validation; WASMOD},
author = {Xu, C.-Y.},
doi = {10.1016/S0168-1923(99)00106-9},
issn = {0168-1923},
journal = {Agricultural and Forest Meteorology},
keywords = {Water balance models},
pages = {295--304},
title = {{Operational testing of a water balance model for predicting climate change impacts}},
url = {http://www.sciencedirect.com/science/article/pii/S0168192399001069},
volume = {98-99},
year = {1999}
}
@article{Henn2015,
author = {Henn, Brian and Clark, Martyn P. and Kavetski, Dmitri and Lundquist, Jessica D.},
doi = {10.1002/2014WR016736},
issn = {00431397},
journal = {Water Resources Research},
keywords = {Henn2015},
mendeley-tags = {Henn2015},
month = {oct},
number = {10},
pages = {8012--8033},
title = {{Estimating mountain basin-mean precipitation from streamflow using Bayesian inference}},
url = {http://doi.wiley.com/10.1002/2014WR016736},
volume = {51},
year = {2015}
}
@article{Huss2012,
annote = {A new physically based approach for calculating glacier ice thickness distribution and volume is presented and applied to all glaciers and ice caps worldwide. Combining glacier outlines of the globally complete Randolph Glacier Inventory with terrain elevation models (Shuttle Radar Topography Mission/Advanced Spaceborne Thermal Emission and Reflection Radiometer), we use a simple dynamic model to obtain spatially distributed thickness of individual glaciers by inverting their surface topography. Results are validated against a comprehensive set of thickness observations for 300 glaciers from most glacierized regions of the world. For all mountain glaciers and ice caps outside of the Antarctic and Greenland ice sheets we find a total ice volu.},
author = {Huss, Matthias and Farinotti, Daniel},
doi = {10.1029/2012JF002523},
issn = {2156-2202},
journal = {Journal of Geophysical Research: Earth Surface},
keywords = {glacier ice volume,glacier inventory,global assessment,ice thickness distribution,sea level rise,water resources},
number = {F4},
pages = {F04010},
title = {{Distributed ice thickness and volume of all glaciers around the globe}},
url = {http://dx.doi.org/10.1029/2012JF002523},
volume = {117},
year = {2012}
}
@article{Bhutiyani2010,
author = {Bhutiyani, M R and Kale, V S and Pawar, N J},
doi = {10.1002/joc.1920},
issn = {1097-0088},
journal = {International Journal of Climatology},
keywords = {climate change,epochal behaviour,global teleconnections,greenhouse gases,northwestern Himalaya,winter and monsoon precipitation},
number = {4},
pages = {535--548},
publisher = {John Wiley {\&} Sons, Ltd.},
title = {{Climate change and the precipitation variations in the northwestern Himalaya: 1866{\{}$\backslash$textendash{\}}2006}},
url = {http://dx.doi.org/10.1002/joc.1920},
volume = {30},
year = {2010}
}
@article{Zhang2016,
abstract = {Twenty-four headwater catchments with varying glacier area ratios (GARs) in the Eastern and Central Tian Shan Mountains were simulated by the glacier-enhanced Soil and Water Assessment Tool (SWAT) model from 1961 to 2007. The mean catchment GAR ranges between 0.7{\%} and 44.8{\%} with a mean of 8.6{\%}. Through synthetic analysis of the glacio-hydrological processes simulation results of the catchments, it was found that the GAR is an effective index that can be used to interpret quantitatively the varying influences of glaciers on runoff across catchments. Among the twenty-four catchments, the ratio of glacier melt contribution (RGMC) to runoff varies between 3.5{\%} and 67.5{\%} with a mean of 24.0{\%}; the ratio of ice melt contribution (RIMC) between 1.4{\%} and 35.8{\%} with a mean of 10.5{\%}; the ratio of ice melt in glacier melt between 33.4{\%} and 59.1{\%} with a mean of 43.4{\%}; the runoff coefficient (RC) between 0.24 and 0.90 with a mean of 0.52; and the coefficient of variation (CV) of runoff between 0.10 and 0.29 with a mean of 0.18. Based on synthetic analysis, it was found that (1) power functions fit the relations between RGMC, RIMC, RC, and CV and GAR with high certainty; (2) the CV decreases with increasing GAR while others increase; and (3) these power functions change sensitively with GAR when GAR is less than 10{\%}, implicating that a small change in GAR may cause remarkable changes in RGMC, RIMC, RC, and CV in the less glacierized catchments.},
author = {Zhang, Yiqing and Luo, Yi and Sun, Lin and Liu, Shiyin and Chen, Xi and Wang, Xiaolei},
doi = {10.1016/j.jhydrol.2016.04.026},
issn = {00221694},
journal = {Journal of Hydrology},
keywords = {Coefficient of variation of runoff,Glacier area ratio,Glacier melt,Runoff coefficient,SWAT},
month = {jul},
pages = {269--277},
title = {{Using glacier area ratio to quantify effects of melt water on runoff}},
url = {http://www.sciencedirect.com/science/article/pii/S0022169416302074},
volume = {538},
year = {2016}
}
@article{Li2011,
annote = {model simulation much depend on calibration period; Our findings support the idea that when using conceptual hydrological models to assess future climate change impacts, a differential split-sample test and Monte Carlo simulation should be used to quantify uncertainties due to parameter instability and non-uniqueness.},
author = {Li, C Z and Zhang, L and Wang, H and Zhang, Y Q and Yu, F L and Yan, D H},
doi = {10.5194/hessd-8-8701-2011},
journal = {Hydrology and Earth System Sciences Discussions},
number = {5},
pages = {8701--8736},
title = {{The transferability of hydrological models under nonstationary climatic conditions}},
url = {http://www.hydrol-earth-syst-sci-discuss.net/8/8701/2011/},
volume = {8},
year = {2011}
}
@article{Zarfl2015,
author = {Zarfl, Christiane and Lumsdon, AlexanderE. and Berlekamp, J{\"{u}}rgen and Tydecks, Laura and Tockner, Klement},
doi = {10.1007/s00027-014-0377-0},
issn = {1015-1621},
journal = {Aquatic Sciences},
keywords = {Biodiversity; Energy; River management; Sustainabi},
number = {1},
pages = {161--170},
publisher = {Springer Basel},
title = {{A global boom in hydropower dam construction}},
url = {http://dx.doi.org/10.1007/s00027-014-0377-0},
volume = {77},
year = {2015}
}
@article{Jacob2014,
author = {Jacob, Daniela and Petersen, Juliane and Eggert, Bastian and Alias, Antoinette and Christensen, Ole B{\o}ssing and Bouwer, LaurensM. and Braun, Alain and Colette, Augustin and Deque, Michel and Georgievski, Goran and Georgopoulou, Elena and Gobiet, Andreas and Menut, Laurent and Nikulin, Grigory and Haensler, Andreas and Hempelmann, Nils and Jones, Colin and Keuler, Klaus and Kovats, Sari and Kroner, Nico and Kotlarski, Sven and Kriegsmann, Arne and Martin, Eric and van Meijgaard, Erik and Moseley, Christopher and Pfeifer, Susanne and Preuschmann, Swantje and Radermacher, Christine and Radtke, Kai and Rechid, Diana and Rounsevell, Mark and Samuelsson, Patrick and Somot, Samuel and Soussana, Jean-Francois and Teichmann, Claas and Valentini, Riccardo and Vautard, Robert and Weber, Bj{\"{o}}rn and Yiou, Pascal},
doi = {10.1007/s10113-013-0499-2},
issn = {1436-3798},
journal = {Regional Environmental Change},
keywords = {Regional climate change; Impact indices; EURO-CORD},
number = {2},
pages = {563--578},
publisher = {Springer Berlin Heidelberg},
title = {{EURO-CORDEX: new high-resolution climate change projections for European impact research}},
url = {http://dx.doi.org/10.1007/s10113-013-0499-2},
volume = {14},
year = {2014}
}
@article{Tripathi2006,
abstract = {Summary The Climate impact studies in hydrology often rely on climate change information at fine spatial resolution. However, general circulation models (GCMs), which are among the most advanced tools for estimating future climate change scenarios, operate on a coarse scale. Therefore the output from a {\{}GCM{\}} has to be downscaled to obtain the information relevant to hydrologic studies. In this paper, a support vector machine (SVM) approach is proposed for statistical downscaling of precipitation at monthly time scale. The effectiveness of this approach is illustrated through its application to meteorological sub-divisions (MSDs) in India. First, climate variables affecting spatio-temporal variation of precipitation at each {\{}MSD{\}} in India are identified. Following this, the data pertaining to the identified climate variables (predictors) at each {\{}MSD{\}} are classified using cluster analysis to form two groups, representing wet and dry seasons. For each MSD, SVM- based downscaling model (DM) is developed for season(s) with significant rainfall using principal components extracted from the predictors as input and the contemporaneous precipitation observed at the {\{}MSD{\}} as an output. The proposed {\{}DM{\}} is shown to be superior to conventional downscaling using multi-layer back-propagation artificial neural networks. Subsequently, the SVM-based {\{}DM{\}} is applied to future climate predictions from the second generation Coupled Global Climate Model (CGCM2) to obtain future projections of precipitation for the MSDs. The results are then analyzed to assess the impact of climate change on precipitation over India. It is shown that {\{}SVMs{\}} provide a promising alternative to conventional artificial neural networks for statistical downscaling, and are suitable for conducting climate impact studies. },
annote = {Downscaling Normalised Error},
author = {Tripathi, Shivam and Srinivas, V V and Nanjundiah, Ravi S},
doi = {10.1016/j.jhydrol.2006.04.030},
issn = {0022-1694},
journal = {Journal of Hydrology},
keywords = {Precipitation},
number = {3-4},
pages = {621--640},
title = {{Downscaling of precipitation for climate change scenarios: A support vector machine approach}},
url = {http://www.sciencedirect.com/science/article/pii/S0022169406002368},
volume = {330},
year = {2006}
}
@article{giesen2010response,
author = {Giesen, R H and Oerlemans, J and Others},
journal = {The Cryosphere},
pages = {191--213},
title = {{Response of the ice cap Hardangerj{\{}{\o}{\}}kulen in southern Norway to the 20th and 21st century climates}},
volume = {4},
year = {2010}
}
@article{Engelhardt:2010-10-01T00:00:00:0941-2948:491,
abstract = {To evaluate the sensitivity of mountain permafrost to atmospheric forcing, the dominant meteorological variables such as temperature, precipitation and timing and duration of snow cover have to be considered. Simulations with a one-dimensional coupled heat and mass transfer model (CoupModel)
are used to investigate the interactions between the atmosphere and the ground focusing on ground temperature evolution and the temporal variability of the depth of the unfrozen top layer in summer (active layer depth). Idealised and observed atmospheric forcing data sets are used to determine
the meteorological conditions, which show the largest impact on the permafrost regime. Borehole temperature and energy balance data from the permafrost station Schilthorn (2900 m asl, Berner Oberland) are used for verification. The results for the Schilthorn site show the largest impact due
to summer temperatures changes during the snow free period and to a lesser extent winter precipitation which influence the duration of the snow cover. Similarly important is the timing of the first snow event in autumn which leads to a sufficiently large snow cover to isolate the ground from
atmospheric forcing. Simulations with different data sets from Regional Climate Model (RCM) simulations derived from an ensemble of models and scenarios show that the differences in changes of active layer depth between different RCMs are on the same order than between different scenarios.
},
author = {Engelhardt, Markus and Hauck, Christian and Salzmann, Nadine},
doi = {10.1127/0941-2948/2010/0476},
journal = {Meteorologische Zeitschrift},
number = {5},
pages = {491--500},
title = {{Influence of atmospheric forcing parameters on modelled mountain permafrost evolution}},
url = {http://www.ingentaconnect.com/content/schweiz/mz/2010/00000019/00000005/art00009},
volume = {19},
year = {2010}
}
@article{Fujita2001,
author = {Fujita, K and Kadota, T and Rana, B and Kayastha, R B and Ageta, Y},
journal = {Bulletin of Glaciological Research},
pages = {51--54},
title = {{Shrinkage of Glacier AX010 in Shrong region, Nepal Himalayas in the 1990s}},
url = {http://www.seppyo.org/bgr/pdf/18/BGR18P51.PDF},
volume = {18},
year = {2001}
}
@techreport{Fleig2013,
author = {Fleig, Anne K},
institution = {Norwegian Water Resources and Energy Directorate},
number = {2},
title = {{Norwegian Hydrological Reference Dataset for Climate Change Studies}},
url = {http://webby.nve.no/publikasjoner/rapport/2013/rapport2013{\_}02.pdf},
year = {2013}
}
@techreport{Førland2007,
abstract = {The Norwegian Agricultural Authority (Statens landbruksforvaltning, SLF) is due to make new legislation on safeguarding and compensation for natural disasters and hazards, and has requested an updated assessment of whether the projected climate changes will make the Norwegian society more or less vulnerable to natural hazards in the next 30-50 years. The main results are described in a report (in Norwegian) to SLF («Utviklingen av naturulykker som f{\o}lge av klimaendringer»). The present report provides the scientific background for the conclusions in the report to SLF, and addresses the extent to which changes are expected in Norway in frequency, extent and magnitude of damages associated with natural hazards under global warming. The main types of natural hazard events discussed are changes in: precipitation, flooding and ice jams, strong winds, sea level and storm surges, avalanches and slides, permafrost, other hazards (e.g. earth quakes, tsunamis, sub sea slides) and the society's vulnerability to natural hazards and disasters. This assessment is made in collaboration between several Norwegian institutions: met.no (Norwegian Meteorological Institute, main responsibility for the assessment); Cicero (Center for International Climate and Environmental Research); ICG/NGI (International Center of Geohazards/Norwegian Geotechnical Institute), NGU (Geological Survey of Norway), NVE (Norwegian Water and Energy Resources Administration).},
author = {F{\o}rland, Eirik J. and Amundsen, Helene and Asvall, Randi Pytte and Benestad, Rasmus and Debernard, Jens and Engen-Skaugen, Torill and Hanssen-Bauer, Inger and Harstveit, Knut and Haugen, Jan Erik and Hovelsrud, Grete K. and Isaksen, Ketil and Jaedicke, Christian and Kronholm, Kalle and K, {\AA}nund Sigurd and Alfnes, Eli},
isbn = {ISSN 1503-8025 e-ISSN 1503-8025},
keywords = {Climate change,natural hazards,society's vulnera},
number = {Report 6/2007},
pages = {120},
title = {{Climate change and natural disasters in Norway - An assessment of possible future changes}},
url = {http://retro.met.no/english/r{\_}and{\_}d{\_}activities/publications/2007/06{\_}2007/report{\_}06{\_}2007.pdf},
year = {2007}
}
@article{Islam2014,
annote = {From Duplicate 1 (Hydrologic impact of climate change on Murray-Hotham catchment of Western Australia: a projection of rainfall-runoff for future water resources planning - Islam, S A; Bari, M A; Anwar, A H M F)

eveluate of climate and hydrological scenarios in West Australia},
author = {Islam, S A and Bari, M A and Anwar, A H M F},
doi = {10.5194/hess-18-3591-2014},
journal = {Hydrology and Earth System Sciences},
number = {9},
pages = {3591--3614},
title = {{Hydrologic impact of climate change on Murray-Hotham catchment of Western Australia: a projection of rainfall-runoff for future water resources planning}},
url = {http://www.hydrol-earth-syst-sci.net/18/3591/2014/},
volume = {18},
year = {2014}
}
@article{tc-8-2195-2014,
author = {Azam, M F and Wagnon, P and Vincent, C and Ramanathan, A L and Favier, V and Mandal, A and Pottakkal, J G},
doi = {10.5194/tc-8-2195-2014},
journal = {The Cryosphere},
number = {6},
pages = {2195--2217},
title = {{Processes governing the mass balance of Chhota Shigri Glacier (western Himalaya, India) assessed by point-scale surface energy balance measurements}},
url = {http://www.the-cryosphere.net/8/2195/2014/},
volume = {8},
year = {2014}
}
@article{Kotlarski2010,
author = {Kotlarski, Sven and Jacob, Daniela and Podzun, Ralf and Paul, Frank},
doi = {10.1007/s00382-009-0685-6},
issn = {0930-7575},
journal = {Climate Dynamics},
keywords = {Glacier mass balance; Regional climate modeling; S},
number = {1},
pages = {27--46},
publisher = {Springer-Verlag},
title = {{Representing glaciers in a regional climate model}},
url = {http://dx.doi.org/10.1007/s00382-009-0685-6},
volume = {34},
year = {2010}
}
@article{Iglesias2011,
abstract = {Water is scarce in Mediterranean countries: cities are crowded with increasing demand; food is produced with large amounts of water; ecosystems demand more water that is often available; drought affects all. As climate change impacts become more noticeable and costlier, some current water management strategies will not be useful. According to the findings of CIRCE, the areas with limited water resources will increase in the coming decades with major consequences for the way we produce food and we protect ecosystems. Based on these projections this paper discusses water policy priorities for climate change adaptation in the Mediterranean. We first summarise the main challenges to water resources in Mediterranean countries and outline the risks and opportunities for water under climate change based on previous studies. Recognising the difficulty to go from precipitation to water policy, we then present a framework to evaluate water availability in response to natural and management conditions, with an example of application in the Ebro basin that exemplifies other Mediterranean areas. Then we evaluate adaptive capacity to understand the ability of Mediterranean countries to face, respond and recover from climate change impacts on water resources. Social and economic factors are key drivers of inequality in the adaptive capacity across the region. Based on the assessment of impacts and adaptive capacity we suggest thresholds for water policy to respond to climate change and link water scarcity indicators to relevant potential adaptation strategies. Our results suggest the need to further prioritise socially and economically sensitive policies.},
annote = {Adapting to Climate Change: Reducing Water-related Risks in Europe; A number of studies have shown that under climate change annual river flow is expected to decrease in Southern Europe and increase in Northern Europe;changes are also expected in the seasonality of river flows with considerable differences over theEuropean region water resources based on discharge},
author = {Iglesias, Ana and Garrote, Luis and Diz, Agustin and Schlickenrieder, Jeremy and Martin-Carrasco, Francisco},
doi = {10.1016/j.envsci.2011.02.007},
issn = {1462-9011},
journal = {Environmental Science {\&} Policy},
keywords = {Mediterranean},
number = {7},
pages = {744--757},
title = {{Re-thinking water policy priorities in the Mediterranean region in view of climate change}},
url = {http://www.sciencedirect.com/science/article/pii/S1462901111000207},
volume = {14},
year = {2011}
}
@article{Kehrwald2008,
author = {Kehrwald, Natalie M and Thompson, Lonnie G and Tandong, Yao and Mosley-Thompson, Ellen and Schotterer, Ulrich and Alfimov, Vasily and Beer, J{\"{u}}rg and Eikenberg, Jost and Davis, Mary E},
doi = {10.1029/2008GL035556},
issn = {1944-8007},
journal = {Geophysical Research Letters},
keywords = {Himalaya,glacier,radiometric},
number = {22},
pages = {L22503},
title = {{Mass loss on Himalayan glacier endangers water resources}},
url = {http://dx.doi.org/10.1029/2008GL035556},
volume = {35},
year = {2008}
}
@article{YANG2000,
annote = {Another point of view is to recognize that the model suffers from deficiencies that must be remedied. In this case, two additional procedures can then be proposed: one is to alter the current state of the model so that its output becomes closer to the observed value (state updating); the other is to better adjust the model to current conditions by changing its parameter values (parameter updating).},
author = {Yang, Xiaoliu and Michel, Claude},
doi = {10.1080/02626660009492355},
journal = {Hydrological Sciences Journal},
number = {4},
pages = {537--546},
title = {{Flood forecasting with a watershed model: a new method of parameter updating}},
url = {http://dx.doi.org/10.1080/02626660009492355},
volume = {45},
year = {2000}
}
@article{sugiyama2007evolution,
author = {Sugiyama, Shin and Bauder, Andreas and Zahno, Conradin and Funk, Martin},
doi = {10.3189/172756407782871143},
journal = {Annals of Glaciology},
number = {1},
pages = {268--274},
publisher = {International Glaciological Society},
title = {{Evolution of Rhonegletscher, Switzerland, over the past 125 years and in the future: application of an improved flowline model}},
url = {http://eprints.lib.hokudai.ac.jp/dspace/handle/2115/34781?locale=en{\&}lang=en},
volume = {46},
year = {2007}
}
@article{Arnell1999,
abstract = {This article describes the development, application and validation of a macro-scale hydrological model, designed to simulate streamflow from climatic inputs over a large geographic domain. The model is a daily water balance model, which assumes that the soil moisture storage capacity varies statistically across the catchment: all other catchment properties, and climatic inputs, are assumed constant across the catchment. Model parameters are derived, directly or indirectly, from digital spatial data bases. The model is currently implemented at a spatial resolution of 0.5{\~{A}}—0.5{\^{A}}° (approximately 2000 km2), because that is the resolution of the currently available climatic input data. In fact, the article emphasises how the form, parameterisation and quality of simulated output are strongly determined by the quality and characteristics of the data used both to define model parameters and to run the model. The article illustrates the model tuning process{\^{a}}€��?which includes assessment of the input data{\^{a}}€��?using the example of an application in Europe.},
author = {Arnell, N W},
doi = {10.1016/S0022-1694(99)00023-2},
issn = {0022-1694},
journal = {Journal of Hydrology},
keywords = {Hydrological modelling},
number = {3-4},
pages = {314--335},
title = {{A simple water balance model for the simulation of streamflow over a large geographic domain}},
url = {http://www.sciencedirect.com/science/article/pii/S0022169499000232},
volume = {217},
year = {1999}
}
@article{Tallaksen1995,
abstract = {Recession analysis is a well-known tool in hydrological analysis. Its application, however, poses many methodical questions, and throughout the literature numerous solutions have been sought. The quantification of the recession curve involves the selection of an analytical expression, derivation of a characteristic recession and optimization of the recession parameters. A major problem is the high variability encountered in the recession behaviour of individual segments. The segments represent different stages in the outflow process, and a physically based short-term or seasonal influence on the recession rate adds to the problem of deriving a characteristic recession. This paper discusses these elements of recession analysis and reviews different ways of characterizing the baseflow recession rate.},
annote = {baseflow is the delayed effects by groundwater and other sources; the empirical methods and modelling approach are detailed review; the paper is mainly based on her PhD thesis},
author = {Tallaksen, L},
doi = {10.1016/0022-1694(94)02540-R},
issn = {0022-1694},
journal = {Journal of Hydrology},
number = {1-4},
pages = {349--370},
title = {{A review of baseflow recession analysis}},
url = {http://www.sciencedirect.com/science/article/pii/002216949402540R},
volume = {165},
year = {1995}
}
@article{Wheater2002,
abstract = {Recent floods in the UK have raised public and political awareness of flood risk. There is an increasing recognition that flood management and land-use planning are linked, and that decision-support modelling tools are required to address issues of climate and land-use change for integrated catchment management. In this paper, the scientific context for fluvial flood modelling is discussed, current modelling capability is considered and research challenges are identified. Priorities include (i) appropriate representation of spatial precipitation, including scenarios of climate change; (ii) development of a national capability for continuous hydrological simulation of ungauged catchments; (iii) improved scientific understanding of impacts of agricultural land-use and land-management change, and the development of new modelling approaches to represent those impacts; (iv) improved representation of urban flooding, at both local and catchment scale; (v) appropriate parametrizations for hydraulic simulation of in-channel and flood-plain flows, assimilating available ground observations and remotely sensed data; and (vi) a flexible decision-support modelling framework, incorporating developments in computing, data availability, data assimilation and uncertainty analysis.},
annote = {a simple model structure does not reflect the complexity of the rainfall-runoff response and a complex model structure is not always supported by the available data. A balance between the complexity of the model and available information is crucial for successful model identification},
author = {Wheater, H S},
doi = {10.1098/rsta.2002.1007},
issn = {1364503X},
journal = {Philosophical Transactions: Mathematical, Physical and Engineering Sciences},
number = {1796},
pages = {1409--1431},
publisher = {The Royal Society},
title = {{Progress in and Prospects for Fluvial Flood Modelling}},
url = {http://www.jstor.org/stable/3066449},
volume = {360},
year = {2002}
}
@article{Jain2010,
author = {Jain, SanjayKumar and Goswami, Ajanta and Saraf, ArunK.},
doi = {10.1007/s11269-009-9523-1},
issn = {0920-4741},
journal = {Water Resources Management},
keywords = {Runoff; Himalaya; Snow; Snowmelt; Climate; GCM},
number = {9},
pages = {1763--1777},
publisher = {Springer Netherlands},
title = {{Assessment of Snowmelt Runoff Using Remote Sensing and Effect of Climate Change on Runoff}},
url = {http://dx.doi.org/10.1007/s11269-009-9523-1},
volume = {24},
year = {2010}
}
@article{Li2014c,
author = {Li, Hong and Xu, C.-Y. and Beldring, Stein},
doi = {10.1016/j.jhydrol.2015.05.044},
journal = {Journal of Hydrology},
title = {{How much can we gain by increasing degree of model complexity?}},
url = {http://www.sciencedirect.com/science/article/pii/S0022169415003947},
year = {2015}
}
@article{Grill2015,
abstract = {The global number of dam constructions has increased dramatically over the past six decades and is forecast to continue to rise, particularly in less industrialized regions. Identifying development pathways that can deliver the benefits of new infrastructure while also maintaining healthy and productive river systems is a great challenge that requires understanding the multifaceted impacts of dams at a range of scales. New approaches and advanced methodologies are needed to improve predictions of how future dam construction will affect biodiversity, ecosystem functioning, and fluvial geomorphology worldwide, helping to frame a global strategy to achieve sustainable dam development. Here, we respond to this need by applying a graph-based river routing model to simultaneously assess flow regulation and fragmentation by dams at multiple scales using data at high spatial resolution. We calculated the cumulative impact of a set of 6374 large existing dams and 3377 planned or proposed dams on river connectivity and river flow at basin and subbasin scales by fusing two novel indicators to create a holistic dam impact matrix for the period 1930–2030. Static network descriptors such as basin area or channel length are of limited use in hierarchically nested and dynamic river systems, so we developed the river fragmentation index and the river regulation index, which are based on river volume. These indicators are less sensitive to the effects of network configuration, offering increased comparability among studies with disparate hydrographies as well as across scales. Our results indicate that, on a global basis, 48{\%} of river volume is moderately to severely impacted by either flow regulation, fragmentation, or both. Assuming completion of all dams planned and under construction in our future scenario, this number would nearly double to 93{\%}, largely due to major dam construction in the Amazon Basin. We provide evidence for the importance of considering small to medium sized dams and for the need to include waterfalls to establish a baseline of natural fragmentation. Our versatile framework can serve as a component of river fragmentation and connectivity assessments; as a standardized, easily replicable monitoring framework at global and basin scales; and as part of regional dam planning and management strategies.},
author = {Grill, G{\"{u}}nther and Lehner, Bernhard and Lumsdon, Alexander E and MacDonald, Graham K and Zarfl, Christiane and Liermann, Catherine Reidy},
doi = {10.1088/1748-9326/10/1/015001},
journal = {Environmental Research Letters},
number = {1},
pages = {15001},
title = {{An index-based framework for assessing patterns and trends in river fragmentation and flow regulation by global dams at multiple scales}},
url = {http://stacks.iop.org/1748-9326/10/i=1/a=015001},
volume = {10},
year = {2015}
}
@article{Abebe2010,
[truncated: 348,866 more chars]
