# Supplementary material for: Precipitation pattern in the Western Himalayas revealed by four datasets
Source: Copernicus journal article supplement (doi:10.5194/hess-22-5097-2018), 2018-10-04
Supplement: Supplementary file 1 [file hess-22-5097-2018-supplement.zip › pdfscreencop.sty]

%%                                   
%%
%% This is file `pdfscreen.sty',
%% generated with the docstrip utility.
%%
%% The original source files were:
%%
%%
%% pdfscreen.dtx  (with options: `package')
%%
%% File: pdfscreen.dtx Copyright (c) 1999, 2000 C. V. Radhakrishnan
%%    
%% This package may be distributed under the terms of the LaTeX Project 
%% Public License, as described in lppl.txt in the base LaTeX distribution.
%% Either version 1.0 or, at your option, any later version.
%%
\NeedsTeXFormat{LaTeX2e}
\def\fileversion{v.1.5}\def\filedate{2000/07/07}
\ProvidesPackage{pdfscreen}
          [\filedate\space\fileversion\space  screen PDF design (CVR)]
\RequirePackage{graphicx}
\RequirePackage{color,calc}
\RequirePackage{comment}
\newcounter{panel}
\newif\if@screen    \@screenfalse
\newif\if@print     \@printfalse
\newif\if@sidebar   \@sidebarfalse
\newif\if@samepage  \@samepagefalse
\newif\if@nocfg     \@nocfgfalse
\newif\if@orange    \@orangefalse
\newif\if@bluelace  \@bluelacefalse
\newif\if@chocolate \@chocolatefalse
\newif\if@palegreen \@palegreenfalse
\newif\if@blue      \@bluefalse
\newif\if@gray      \@grayfalse
\newif\if@default   \@defaultfalse
\newif\if@paneltoc  \@paneltocfalse
\newif\if@code      \@codefalse
\newif\if@sectionbreak\@sectionbreakfalse
\newcounter{driver} \newcounter{scheme}
\DeclareOption{pdftex}{\setcounter{driver}{0}}
\DeclareOption{dvips}{\setcounter{driver}{1}}
\DeclareOption{dvipsone}{\setcounter{driver}{2}}
\DeclareOption{dvipdf}{\setcounter{driver}{3}}
\DeclareOption{dvipdfm}{\setcounter{driver}{4}}
\DeclareOption{dviwindo}{\setcounter{driver}{5}}
\DeclareOption{ps2pdf}{\setcounter{driver}{6}}
\DeclareOption{vtex}{\setcounter{driver}{7}}
\DeclareOption{nocfg}{\@nocfgtrue}
\DeclareOption{article}{\relax}
\DeclareOption{amsart}{\relax}
\DeclareOption{book}{\relax}
\DeclareOption{amsbook}{\relax}
\DeclareOption{sidebar}{\setcounter{panel}{1}}
\DeclareOption{absconsamepage}{\relax}
\DeclareOption{bluelace}{\setcounter{scheme}{1}}
\DeclareOption{chocolate}{\setcounter{scheme}{2}}
\DeclareOption{palegreen}{\setcounter{scheme}{3}}
\DeclareOption{orange}{\setcounter{scheme}{4}}
\DeclareOption{gray}{\setcounter{scheme}{5}}
\DeclareOption{blue}{\setcounter{scheme}{0}}
\DeclareOption{panelleft}{\setcounter{panel}{1}}
\DeclareOption{leftpanel}{\setcounter{panel}{1}}
\DeclareOption{panelright}{\setcounter{panel}{2}}
\DeclareOption{rightpanel}{\setcounter{panel}{2}}
\DeclareOption{nopanel}{\setcounter{panel}{0}}
\DeclareOption{print}{\@printtrue}
\DeclareOption{screen}{\@screentrue}
\DeclareOption{sidebar}{\setcounter{panel}{1}}
\DeclareOption{nopanel}{\setcounter{panel}{0}}
\DeclareOption{default}{\@defaulttrue}
\DeclareOption{paneltoc}{\@paneltoctrue}
\DeclareOption{code}{\@codetrue}
\DeclareOption{sectionbreak}{\@sectionbreaktrue}
\def\PDFSCR@Warning#1{\PackageWarning{pdfscreen}{#1}}
\def\PDFSCR@Info#1{\PackageInfo{pdfscreen}{#1}}
\def\PDFSCR@WarningNoLine#1{\PackageWarningNoLine{pdfscreen}{#1}}
\def\PDFSCR@langwarn#1{%
\PackageWarningNoLine{pdfscreen}{Sorry, language `#1'
            not supported\MessageBreak
            in this version.
            English strings are used instead.\MessageBreak
            However you can give all the strings in the *.cfg%
            \MessageBreak
            file which will eventually be read by the package.
            \MessageBreak\MessageBreak
            If you can suggest translations for
            this language,\MessageBreak
            please mail them to the author of this package}}
\@onlypreamble\PDFSCR@langwarn
  \def\paneltitlepagename#1{\gdef\@Paneltitlepagename{#1}}
  \def\panlabstractname#1{\gdef\@Panelabstractname{#1}}
  \def\panelcontentsname#1{\gdef\@Panelcontentsname{#1}}
  \def\panelhomepagename#1{\gdef\@Panelhomepagename{#1}}
  \def\panelfullscreenname#1{\gdef\@Panelfullscreenname{#1}}
  \def\panelgobackname#1{\gdef\@Panelgobackname{#1}}
  \def\panelclosename#1{\gdef\@Panelclosename{#1}}
  \def\panelquitname#1{\gdef\@Panelquitname{#1}}
  \def\panelpagename#1{\gdef\@Panelpagename{#1}}
  \def\panelofname#1{\gdef\@Panelofname{#1}}
  \let\@Paneltitlepagename\@empty \let\@Panelabstractname\@empty
  \let\@Panelcontentsname\@empty  \let\@Panelhomepagename\@empty
  \let\@Panelgobackname\@empty    \let\@Panelgobackname\@empty
  \let\@Panelquitname\@empty      \let\@Panelclosename\@empty
  \let\@Panelpagename\@empty      \let\@Panelofname\@empty
  \let\@Panelfullscreenname\@empty
\DeclareOption{english}{%
  \paneltitlepagename{Title Page}
  \panlabstractname{Abstract}
  \panelcontentsname{Contents}
  \panelfullscreenname{Full Screen}
  \panelhomepagename{Home Page}
  \panelgobackname{Go Back}
  \panelclosename{Close}
  \panelquitname{Quit}
  \panelpagename{Page}
  \panelofname{of}
  }
\DeclareOption{french}{%
  \paneltitlepagename{Page de Titre}
  \panlabstractname{R\'esum\'e}
  \panelcontentsname{Sommaire}
  \panelfullscreenname{Full Screen}
  \panelhomepagename{ Page d\'accueil}
  \panelgobackname{Retour}
  \panelclosename{Fermer}
  \panelquitname{Quitter}
  \panelpagename{Page}
  \panelofname{de}
  }
\DeclareOption{dutch}{
  \paneltitlepagename{Titel Pagina}
  \panlabstractname{Samenvatting}
  \panelcontentsname{Inhoudsopgave}
  \panelfullscreenname{Full Screen}
  \panelhomepagename{Startpagina}
  \panelgobackname{Ga terug}
  \panelclosename{Sluiten}
  \panelquitname{Be\"eindigen}
  \panelpagename{Pagina}
  \panelofname{van}
  }
\DeclareOption{czech}{%
  \paneltitlepagename{Tituln\'{\i} strana}
  \panlabstractname{Abstrakt}
  \panelcontentsname{Obsah}
  \panelfullscreenname{Full Screen}
  \panelhomepagename{\'Uvodn\'{\i} strana}
  \panelgobackname{Zp\v{e}t}
  \panelclosename{Zav\v{r}\'{\i}t}
  \panelquitname{Konec}
  \panelpagename{Strana}
  \panelofname{z}
  }
\DeclareOption{norsk}{%
  \paneltitlepagename{Forside}
  \panlabstractname{Sammendrag}
  \panelcontentsname{Innhold}
  \panelfullscreenname{Full Screen}
  \panelhomepagename{Hjemmeside}
  \panelgobackname{G\aa\ tilbake}
  \panelclosename{Lukk}
  \panelquitname{Avslutt}
  \panelpagename{Side}
  \panelofname{av}
  }
\DeclareOption{nynorsk}{%
  \paneltitlepagename{Forside}
  \panlabstractname{Samandrag}
  \panelcontentsname{Innhald}
  \panelfullscreenname{Full Screen}
  \panelhomepagename{Heimeside}
  \panelgobackname{G\aa\ tilbake}
  \panelclosename{Lat att}
  \panelquitname{Avslutt}
  \panelpagename{Side}
  \panelofname{av}
  }
\DeclareOption{slovak}{%
  \paneltitlepagename{Tituln\'a strana}
  \panlabstractname{Abstrakt}
  \panelcontentsname{Obsah}
  \panelfullscreenname{Full Screen}
  \panelhomepagename{Domovsk\'a str\'anka}
  \panelgobackname{Sp\"a\v t}
  \panelclosename{Zatvori\v t}
  \panelquitname{Koniec}
  \panelpagename{Strana}
  \panelofname{z}
  }
\DeclareOption{portuges}{%
  \paneltitlepagename{P\'agina de Rosto}
  \panlabstractname{Sum\'ario}
  \panelcontentsname{\'Indice Geral}
  \panelfullscreenname{Full Screen}
  \panelhomepagename{Homepage}
  \panelgobackname{Voltar}
  \panelclosename{Fechar}
  \panelquitname{Desistir}
  \panelpagename{P\'agina}
  \panelofname{de}
  }
\DeclareOption{spanish}{%
  \paneltitlepagename{P\'agina de Abertura}
  \panlabstractname{Resumen}
  \panelcontentsname{Contenido}
  \panelfullscreenname{Full Screen}
  \panelhomepagename{P\'agina www}
  \panelgobackname{Regresar}
  \panelclosename{Cerrar}
  \panelquitname{Abandonar}
  \panelpagename{P\'agina}
  \panelofname{de}
  }
\DeclareOption{swedish}{%
  \paneltitlepagename{F\"ors\"attsblad}
  \panlabstractname{Sammanfattning}
  \panelcontentsname{Inneh\aa{}ll}
  \panelfullscreenname{Full Screen}
  \panelhomepagename{Hemsida}
  \panelgobackname{Tillbaka}
  \panelclosename{St\"ang}
  \panelquitname{Avsluta}
  \panelpagename{Sida}
  \panelofname{av}
  }
\DeclareOption{danish}{%
  \paneltitlepagename{Forside}
  \panlabstractname{Resum\'e}
  \panelcontentsname{Indhold}
  \panelfullscreenname{Full Screen}
  \panelhomepagename{Hjemmeside}
  \panelgobackname{G\aa\ tilbage}
  \panelclosename{Luk}
  \panelquitname{Afslut}
  \panelpagename{Side}
  \panelofname{af}
  }
\DeclareOption{polish}{%
  \paneltitlepagename{Strona tytu\l owa}
  \panlabstractname{Streszczenie}
  \panelcontentsname{Spis tre\'sci}
  \panelfullscreenname{Full Screen}
  \panelhomepagename{Strona g\l \'owna}
  \panelgobackname{Powr\'ot}
  \panelclosename{Zamknij}
  \panelquitname{Koniec}
  \panelpagename{Strona}
  \panelofname{z}
  }
\DeclareOption{russian}{%
  \paneltitlepagename{\cyr\CYRT\cyri\cyrt\cyru\cyrl\cyrsftsn\cyrn\cyra\cyrya{}
    \cyrs\cyrt\cyrr\cyra\cyrn\cyri\cyrc\cyra}
  \panlabstractname{\cyr\CYRA\cyrn\cyrn\cyro\cyrt\cyra\cyrc\cyri\cyrya}
  \panelcontentsname{\cyr\CYRS\cyro\cyrd\cyre\cyrr\cyrzh\cyra\cyrn\cyri\cyre}
  \panelfullscreenname{Full Screen}
  \panelhomepagename{Home Page}
  \panelgobackname{\cyr\CYRN\cyra\cyrz\cyra\cyrd}
  \panelclosename{\cyr\CYRZ\cyra\cyrk\cyrr\cyrery\cyrt\cyrsftsn}
  \panelquitname{\cyr\CYRV\cyrery\cyrh\cyro\cyrd}
  \panelpagename{\cyr\CYRS\cyrt\cyrr\cyra\cyrn\cyri\cyrc\cyra}
  \panelofname{\cyr\cyri\cyrz}
  }
\DeclareOption{german}{%
  \paneltitlepagename{Titelseite}
  \panlabstractname{Zusammenfassung}
  \panelcontentsname{Inhalt}
  \panelfullscreenname{Vollbild}
  \panelhomepagename{Startseite}
  \panelgobackname{Zur\"uck}
  \panelclosename{Schlie\ss en}
  \panelquitname{Beenden}
  \panelpagename{Seite}
  \panelofname{von}
  }
\DeclareOption{slovene}{%
  \paneltitlepagename{Naslovnica}
  \panlabstractname{Povzetek}
  \panelcontentsname{Kazalo}
  \panelfullscreenname{Full Screen}
  \panelhomepagename{Spletna stran}
  \panelgobackname{Nazaj}
  \panelclosename{Zapri}
  \panelquitname{Kon\v{c}aj}
  \panelpagename{Stran}
  \panelofname{od}
  }
\DeclareOption{catalan}{%
  \paneltitlepagename{Inici}
  \panlabstractname{Resum}
  \panelcontentsname{Contingut}
  \panelfullscreenname{Full Screen}
  \panelhomepagename{Plana personal}
  \panelgobackname{Tornar}
  \panelclosename{Tancar}
  \panelquitname{Sortir}
  \panelpagename{P\`agina}
  \panelofname{de}
  }
\DeclareOption{american}{\ExecuteOptions{english}}
\DeclareOption{austrian}{\PDFSCR@langwarn{austrian}\ExecuteOptions{english}}
\DeclareOption{brazil}{\ExecuteOptions{portuges}}
\DeclareOption{breton}{\PDFSCR@langwarn{breton}\ExecuteOptions{english}}
\DeclareOption{croatian}{\PDFSCR@langwarn{croatian}\ExecuteOptions{english}}
\DeclareOption{esperanto}{\PDFSCR@langwarn{esperanto}\ExecuteOptions{english}}
\DeclareOption{finnish}{\PDFSCR@langwarn{finnish}\ExecuteOptions{english}}
\DeclareOption{galician}{\PDFSCR@langwarn{galician}\ExecuteOptions{english}}
\DeclareOption{italian}{\PDFSCR@langwarn{italian}\ExecuteOptions{english}}
\DeclareOption{magyar}{\PDFSCR@langwarn{magyar}\ExecuteOptions{english}}
\DeclareOption{romanian}{\PDFSCR@langwarn{romanian}\ExecuteOptions{english}}
\DeclareOption{turkish}{\PDFSCR@langwarn{turkish}\ExecuteOptions{english}}
\DeclareOption{francais}{\typeout{******Please use `french' instead of `francais'*****}%
   \ExecuteOptions{french}}
\DeclareOption{germanb}{\typeout{******Please use `german' instead of `germanb'******}%
   \ExecuteOptions{german}}
\ExecuteOptions{english,default}
\ProcessOptions
%******** Screen options starts here *****************
\if@screen
\@ifundefined{hyperref}{%
 \ifcase\thedriver\RequirePackage[pdftex]{hyperref}\or
  \RequirePackage[dvips]{hyperref}\or
  \RequirePackage[dvipsone]{hyperref}\or
  \RequirePackage[dvipdf]{hyperref}\or
  \RequirePackage[dvipdfm]{hyperref}\or
  \RequirePackage[dviwindo]{hyperref}\or
  \RequirePackage[ps2pdf]{hyperref}\or
  \RequirePackage[vtex]{hyperref}\or
 \PDFSCR@Warning{Unknown backend driver}
 \fi}
 {\PDFSCR@Warning{hyperref already loaded}}
\hypersetup{pagebackref,pdfpagemode=none,colorlinks,%
             pdfmenubar=false,%
             pdftoolbar=false,%
             pdffitwindow=true,pdfcenterwindow=true,%
             pdfwindowui=false,menucolor=menucolor,%
             pdfview=Fit,pdfstartview=Fit,backref}
\includecomment{screen}
\excludecomment{print}
\def\ScreenLastPage{100}
\let\emblema\@gobble
\let\emblemb\@gobble
\let\affname\@gobble
\let\divname\@gobble
\let\urlid\@gobble
\let\emailid\@gobble
\let\@emblema\@empty
\let\@urlid\@empty
\let\@emailid\@empty
\let\@affname\@empty
\let\@divname\@empty
  \definecolor{coxcolor}{rgb}{1,.937,.835}
  \definecolor{boxcolor}{rgb}{.001,0,.502}
  \definecolor{bboxcolor}{rgb}{.9,.941,.902}
  \definecolor{rcolor}{rgb}{.439,.502,.565}
  \definecolor{olivedrab}{rgb}{.42,.557,.137}
  \definecolor{fcolor}{rgb}{0,1,1}
  \definecolor{orange}{rgb}{1,.549,0}
  \definecolor{orange1}{rgb}{1,.5,0}
  \definecolor{menucolor}{rgb}{1,.25,0}
  \definecolor{paleblue}{rgb}{0,0,0.1}
\if@default\PDFSCR@Info{Default options loaded}
  \definecolor{panelbackground}{rgb}{.455,.832,.979}
  \definecolor{logobackground}{rgb}{.35,.73,.87}
  \definecolor{buttonbackground}{rgb}{0,.624,.820}
  \definecolor{buttonshadow}{rgb}{.001,0,.502}
  \definecolor{section0}{rgb}{0,.5,.1}
  \definecolor{section1}{rgb}{0,.5,1}
  \definecolor{section2}{rgb}{0,.5,.7}
  \definecolor{section3}{rgb}{0,.5,.4}
  \definecolor{section4}{rgb}{.4,.5,.2}
  \definecolor{section5}{rgb}{.5,.5,.3}
\fi
\ifnum\thescheme=1%{bluelace}
  \PDFSCR@Info{Color scheme `bluelace' loaded}
  \definecolor{panelbackground}{rgb}{.902,.902,.980}
  \definecolor{buttonbackground}{rgb}{1,.855,.725}
  \definecolor{buttonshadow}{rgb}{.855,.647,.125}
  \definecolor{orange}{rgb}{1,.549,0}
  \definecolor{orange1}{rgb}{1,.5,0}
  \definecolor{section0}{rgb}{.722,.525,.431}
  \definecolor{section1}{rgb}{.855,.647,.123}      
  \definecolor{section2}{rgb}{.737,.561,.561}
  \definecolor{section3}{rgb}{.804,.361,.361}
  \definecolor{section4}{rgb}{.545,.271,.75}
  \definecolor{section5}{rgb}{.627,.322,.176}
\else
\ifnum\thescheme=2%{chocolate}
  \PDFSCR@Info{Color scheme 'chocolate' loaded}
  \definecolor{panelbackground}{rgb}{.871,.722,.529}
  \definecolor{buttonbackground}{rgb}{.957,.643,.376}
  \definecolor{buttonshadow}{rgb}{.824,.412,.118}
  \definecolor{section0}{rgb}{.722,.525,.431}
  \definecolor{section1}{rgb}{.980,.502,.447}      
  \definecolor{section2}{rgb}{ 1.0,.549,.000}
  \definecolor{section3}{rgb}{1.00,.388,.278}
  \definecolor{section4}{rgb}{1.00,.271,.000}
  \definecolor{section5}{rgb}{1.00,.412,.706}
\else
\ifnum\thescheme=3%{palegreen}
  \PDFSCR@Info{Color scheme 'palegreen' loaded}
  \definecolor{panelbackground}{rgb}{.604,.933,.604}
  \definecolor{buttonbackground}{rgb}{.000,.804,.000}
  \definecolor{buttonshadow}{rgb}{.000,.545,.000}
  \definecolor{section0}{rgb}{.000,.845,.000}
  \definecolor{section1}{rgb}{.000,.745,.000}      
  \definecolor{section2}{rgb}{.000,.645,.133}
  \definecolor{section3}{rgb}{.000,.488,.278}
  \definecolor{section4}{rgb}{.000,.371,.000}
  \definecolor{section5}{rgb}{.000,.212,.000}
\else
\ifnum\thescheme=4%{orange}
  \PDFSCR@Info{Color scheme 'orange' loaded}
  \definecolor{panelbackground}{rgb}{1.00,.867,.000}
  \definecolor{buttonbackground}{rgb}{.804,.522,.000}
  \definecolor{buttonshadow}{rgb}{.545,.271,.000}
  \definecolor{section0}{rgb}{.804,.522,.000}
  \definecolor{section1}{rgb}{.804,.522,.000}      
  \definecolor{section2}{rgb}{.804,.422,.133}
  \definecolor{section3}{rgb}{.804,.322,.278}
  \definecolor{section4}{rgb}{.804,.222,.000}
  \definecolor{section5}{rgb}{.804,.122,.000}
\else
\ifnum\thescheme=5%{gray}
  \PDFSCR@Info{Color scheme 'gray' loaded}
  \definecolor{panelbackground}{gray}{.8}
  \definecolor{buttonbackground}{gray}{.6}
  \definecolor{buttonshadow}{gray}{.2}
  \definecolor{orange}{rgb}{1,.549,0}
  \definecolor{orange1}{rgb}{1,.5,0}
  \definecolor{section0}{rgb}{0,.5,.1}
  \definecolor{section1}{rgb}{0,.5,1}
  \definecolor{section2}{rgb}{0,.5,.5}
  \definecolor{section3}{rgb}{0,.5,.4}
  \definecolor{section4}{rgb}{.4,.5,.2}
  \definecolor{section5}{rgb}{.5,.5,.3}
\else
  \PDFSCR@Info{No color scheme specified \MessageBreak
                  default color scheme loaded}
  \@defaulttrue
\fi\fi\fi\fi\fi
%
%------------------------ Macros for code listing --------------
\if@code
\def\verbatim@font{%
  \normalfont \ttfamily\small
  \color{section0}
  \catcode`\<=\active
  \catcode`\>=\active
}
\begingroup
  \catcode`\<=\active
  \catcode`\>=\active
  \gdef<{\@ifnextchar<\@lt\@meta}
  \gdef>{\@ifnextchar>\@gt\@gtr@err}
  \gdef\@meta#1>{\@PDFm{#1}}
  \gdef\@lt<{\char`\<}
  \gdef\@gt>{\char`\>}
\endgroup
\def\@gtr@err{%
   \PDFSCR@Warning{%
      Isolated \protect>\MessageBreak%
      In this document class, \protect<...\protect>\MessageBreak
      is used to indicate a parameter.\MessageBreak
      I've just found a \protect> on its own.\MessageBreak
      Perhaps you meant to type \protect>\protect>?
   }%
}
\def\verbatim@nolig@list{\do\`\do\,\do\'\do\-}
\def\@PDFm#1{\mbox{\color{red}$\langle$\it#1\/$\rangle$}}
\def\arg#1{{\color{section1}{\tt\string{}\@PDFm{#1}{\tt\string}}}}
\def\@PDFM#1{\mbox{\color{red}\it#1\/}}
\def\Arg#1{{\color{section1}{\tt\string{}\@PDFM{#1}{\tt\string}}}}
\def\oarg#1{{\color{section1}{\tt[}\@PDFm{#1}{\tt]}}}
\def\Oarg#1{{\color{section1}{\tt[}\@PDFM{#1}{\tt]}}}
 \definecolor{wheat}{rgb}{.96, .87, .70}
 \definecolor{oldlace}{rgb}{.992, .96187, .902}
 \definecolor{snow}{rgb}{1, .98, .98}
 \definecolor{ghostwhite}{rgb}{.973, .973, 1}
 \definecolor{cornsilk}{rgb}{1, .973, .863}
 \definecolor{honeydew}{rgb}{.941, 1, .941}
 \definecolor{lavenderdark}{rgb}{.8, .8, .9529411}
 \definecolor{lavender}{rgb}{.902, .902, .980}
 \definecolor{lightblue}{rgb}{.8, .8, .95}
 \definecolor{lightgray}{rgb}{.827, .827, .827}
 \definecolor{lightsteelblue}{rgb}{.690, .769, .871}
 \definecolor{lightturquoise}{rgb}{.686, .933, .933}
 \definecolor{darkgreen}{rgb}{.0, .392, .0}
 \definecolor{yellowgreen}{rgb}{.604, .804, .196}
 \definecolor{vlightblue}{rgb}{.88, .85, .95}
 \definecolor{khaki}{rgb}{.741, .718, .42}
\@ifundefined{rowcolor}{}{\arrayrulecolor{section1}}
\definecolor{tabcolor}{rgb}{.973, .973, 1}
\@ifundefined{decl}{%
\newenvironment{decl}[1][]%
    {\par\small\addvspace{1.5ex plus .5ex minus .5ex}%
     \vskip -\parskip
     \noindent\hspace{-\leftmarginii}%
     \bgroup\begin{tabular}{|>{\columncolor{tabcolor}}l|}\hline\\[-6pt]
      \ignorespaces}%
    {\\[3pt]\hline\end{tabular}\egroup\par%
     \vspace{1.5ex}\ignorespacesafterend\noindent}}{}
\RequirePackage{shortvrb}
\MakeShortVerb{\|}
\fi %---------- end of \if@code option ----------
%
%-------------- Button macros -------------
%
\@ifundefined{@PDFbox}{\newbox\@PDFbox}{}
\@ifundefined{@tempdimc}{\newdimen\@tempdimc}{}
\newdimen\shadowsize
\shadowsize 1pt
\def\shadowbox{\PDFBox\@shadowbox}
\def\@shadowbox#1{%
  \setbox\@PDFbox\hbox{\fbox{#1}}%
  \leavevmode\vbox{%
    \offinterlineskip
    \dimen@=\shadowsize
    \advance\dimen@ .5\fboxrule
    \hbox{\copy\@PDFbox\kern-.5\fboxrule\lower\shadowsize\hbox{%
      \vrule \@height\ht\@PDFbox \@depth\dp\@PDFbox \@width\dimen@}}%
    \vskip-\dimen@
    \moveright\shadowsize\vbox{%
      \hrule \@width\wd\@PDFbox \@height\dimen@}}}
\newtoks\do@PDFBox
\def\PDFBox#1{%
  \do@PDFBox{#1}%
  \afterassignment\begin@PDFBox
  \setbox\@PDFbox=\hbox}
\def\begin@PDFBox{\aftergroup\end@PDFBox}
\def\end@PDFBox{\the\do@PDFBox{\box\@PDFbox}}%
%
  \definecolor{buttondisable}{gray}{.7}
  \definecolor{Gray}{rgb}{.895,.93,.916}
  \def\FBlack{\ifnum\thepage=1\color{buttondisable}\else\Black\fi}
  \def\LBlack{\ifnum\thepage=\number\ScreenLastPage\color{buttondisable}%
      \else\Black\fi}
  \def\ContPage{2}
  \def\DBlack{\ifnum\thepage=\number\ContPage\color{buttondisable}%
      \else\Black\fi}
  \def\Black{\color{black}}
    \def\contentsname{\protect\hypertarget{contents}{\@Panelcontentsname}
      \immediate\write\@auxout{\string\gdef\string\ContPage{\thepage}}}
    \def\abstractname{\protect\hypertarget{abstract}{\@Panelabstractname}}
    \def\emailid#1{\def\@emailid{mailto:#1}}
    \def\urlid#1{\def\@urlid{http://#1}}
    \def\markboth#1#2{\gdef\lmark{#1}\gdef\rmark{#2}}
    \def\emblema#1{\def\@emblema{#1}}
    \def\@grerr{\phantom{XXXXXXXX}}
    \def\affname#1{\def\@affname{#1}}
    \def\@afferr{Name of Organization}
    \def\@diverr{Name of Division}
    \def\divname#1{\def\@divname{#1}}
    \newlength\panelwidth
    \ifnum\thepanel>0%
     \setlength\panelwidth{.15\paperwidth}%%.25
      \ifdim\panelwidth<1in\setlength\panelwidth{1in}\fi\else
     \setlength\panelwidth{0pt}
    \fi
  \fboxsep0pt\fboxrule.2pt
  \RequirePackage{amssymb,amsbsy}
  \def\btl{\ensuremath{\blacktriangleleft}}
  \def\rtl{\ensuremath{\blacktriangleright}}
\def\panelfont{\fontsize{7pt}{7pt}\itshape\selectfont}
\def\st{\hbox{\vrule height10pt depth5pt width\z@}\panelfont}
\def\addButton#1#2{\begingroup\normalsfcodes\fboxsep0pt\fboxrule.4pt\shadowsize.4pt%
       \sffamily\color{buttonshadow}\shadowbox{\colorbox{buttonbackground}%
       {\hbox to #1{\hfil\Black\st#2\hfil}}\color{buttonshadow}}\endgroup}
%
%------------ Panel macros ----------------
%
\def\paneloverlay#1{\gdef\@paneloverlay{#1}}
\def\paneloverlayempty{\let\@paneloverlay\@empty}
\let\@paneloverlay\@empty
\def\@panel{%
     \begingroup\normalsfcodes\ifx\@paneloverlay\@empty%
      \colorbox{panelbackground}{\panel}%
   \else%
    \vbox to\z@{\hbox to\z@{\includegraphics[width=\panelwidth,%%
        height=\paperheight]{\@paneloverlay}%
       \hspace{-\panelwidth}\hfill}\vspace{-\paperheight}\vfill}%
   \panel\fi%
  \endgroup}%
\def\panel{%
       \begin{minipage}[t][\paperheight][c]{\panelwidth}%
       \normalsfcodes%
       \centering%
        \null\vspace*{12pt}\vfill%
        \ifx\@emblema\@empty\relax\else%
        \@@logo{\@emblema}\par\vfill\fi%
     \if@paneltoc%
      \@panel@toc\par\vfill\else\relax\fi%
       \color{blue}%
   \NavigationPanel%
   \par\vfill
   \null\vspace*{1pt}
   \end{minipage}%
}
%
\def\imageButton#1#2#3{\includegraphics[width=#1,height=#2]{#3}}
\newdimen\buttonwidth\newdimen\smallbuttonwidth
\setlength\buttonwidth{.7\panelwidth}
\setlength\smallbuttonwidth{.35\panelwidth}
\addtolength{\smallbuttonwidth}{-1.2pt}
\def\NavigationPanel{\normalsfcodes%
     \href{\@urlid}{\addButton{\buttonwidth}{\@Panelhomepagename}}\\ \pfill
     \Acrobatmenu{FirstPage}{\addButton{\buttonwidth}{\FBlack\@Paneltitlepagename}}\\\pfill
     \if@paneltoc\relax\else%
      \hyperlink{contents}{\addButton{\buttonwidth}{\DBlack\@Panelcontentsname}}\\\pfill\fi
     \Acrobatmenu{FirstPage}{\addButton{\smallbuttonwidth}{\FBlack\scalebox{.8}[1.4]{\btl\btl}}}\hspace*{-2pt}
     \Acrobatmenu{LastPage}{\addButton{\smallbuttonwidth}{\LBlack\scalebox{.8}[1.4]{\rtl\rtl}}}\\\pfill
     \Acrobatmenu{PrevPage}{\addButton{\smallbuttonwidth}{\FBlack\scalebox{.8}[1.4]{\btl}}}\hspace*{-2pt}
     \Acrobatmenu{NextPage}{\addButton{\smallbuttonwidth}{\LBlack\scalebox{.8}[1.4]{\rtl}}}\\\pfill
     \Acrobatmenu{GoToPage}{\addButton{\buttonwidth}{\@Panelpagename\space
       \textcolor{red}{\thepage}\space\@Panelofname\space
       \textcolor{red}{\ScreenLastPage}}}\\\pfill
     \Acrobatmenu{GoBack}{\addButton{\buttonwidth}{\@Panelgobackname}}\\\pfill
     \Acrobatmenu{FullScreen}{\addButton{\buttonwidth}{\@Panelfullscreenname}}\\\pfill
     \Acrobatmenu{Close}{\addButton{\buttonwidth}{\@Panelclosename}}\\\pfill
     \Acrobatmenu{Quit}{\addButton{\buttonwidth}{\@Panelquitname}}\\
}
\def\pfill{\vfill}
%
%-------------- Verbatim fix -------------
%
% This code is provided by DP Story
\newdimen\@PDFspaceleft
\def\@PDFpagespace{%
  \ifdim\pagetotal=0pt
     \@PDFspaceleft=\vsize
   \else
     \@PDFspaceleft=\pagegoal
     \advance\@PDFspaceleft by-\pagetotal
 \fi}
\let\@PDFverbatim\verbatim
\let\@PDFendverbatim\endverbatim
\AtBeginDocument{%
   \def\verbatim{\begingroup\setbox0=\vbox\bgroup
         \hsize=\linewidth%
         \@PDFverbatim\verbatim@font}
   \def\endverbatim{\@PDFendverbatim\egroup
    \@PDFpagespace\ifdim\@PDFspaceleft>\ht0 
       \else 
        \setbox1=\vsplit0 to\@PDFspaceleft
        \verbatim@font\unvbox1 \penalty\@M
       \fi
    \ifvoid0\relax\else\verbatim@font\unvbox0\fi
    \endgroup}
  \def\@verb{\@vobeyspaces \frenchspacing\@sverb}
} 

% end of DPS' code
%
%-------------- end of Verbatim fix -------------
%
%-------------- Layout macros ------------------- 
%
  \newdimen\@Leftmargin   \@Leftmargin=0cm
  \newdimen\@Rightmargin  \@Rightmargin=0cm
  \newdimen\@Topmargin    \@Topmargin=0in
  \newdimen\@Bottommargin \@Bottommargin=0in
  %
\setlength\headheight{0pt}
\setlength\headsep   {0pt}
\setlength\footskip  {0pt}
\hoffset=0pt
\voffset=0pt
\pagestyle{empty}
%
  \def\InitLayout{
    \setlength{\textwidth}{\paperwidth}
    \addtolength{\textwidth}{-\@Leftmargin}
    \addtolength{\textwidth}{-\@Rightmargin}
    \setlength{\textheight}{\paperheight}
    \addtolength{\textheight}{-\@Topmargin}
    \addtolength{\textheight}{-\@Bottommargin}
    \addtolength{\textheight}{-\headheight}
    \addtolength{\textheight}{-\headsep}
    \addtolength{\textheight}{-\footskip}
    \setlength{\oddsidemargin}{\@Leftmargin}
    \addtolength{\oddsidemargin}{-1in}
    \setlength{\evensidemargin}{\@Leftmargin}%{\@Rightmargin}
    \addtolength{\evensidemargin}{-1in}
    \setlength{\topmargin}{\@Topmargin}
    \addtolength{\topmargin}{-1in}
  }
  \def\marginsize#1#2#3#4{
    \@Leftmargin=#1
    \@Rightmargin=#2
    \@Topmargin=#3
    \@Bottommargin=#4
    \InitLayout
  }
\newdimen\Textmarginright
\newdimen\Textmarginleft
\newdimen\Textmargintop
\newdimen\Textmarginbottom
\newdimen\marginright
\newdimen\marginleft
\newdimen\margintop
\newdimen\marginbottom
\newdimen\panelheight
\newdimen\LLX
\newdimen\LLY
\newdimen\URX
\newdimen\URY
\newdimen\calfactor
\setlength\calfactor{0pt}
\def\margins#1#2#3#4{%
    \marginleft=#1
    \marginright=#2
    \margintop=#3 
    \marginbottom=#4
}
\def\screensize#1#2{\paperheight=#1%
    \paperwidth=#2
    \InitLayout
\ifcase\thepanel
  \setlength\Textmarginright{\marginright}
  \setlength\Textmarginleft{\marginleft}
  \setlength\Textmargintop{\margintop}
  \setlength\Textmarginbottom{\marginbottom}
  \setlength\LLX{\calfactor}
  \setlength\LLY{\calfactor}
  \setlength\overlaywidth{\paperwidth}
  \setlength\URX{\overlaywidth-2\calfactor}
  \setlength\URY{\paperheight-2\calfactor}
  \PDFSCR@Info{no panel options loaded}
\or%ifnum\thepanel=1
  \setlength\Textmarginright{\marginright}
  \setlength\Textmarginleft{\panelwidth}
  \addtolength\Textmarginleft{\marginleft}
  \setlength\Textmargintop{\margintop}
  \setlength\Textmarginbottom{\marginbottom}
  \setlength\LLX{\panelwidth+\calfactor}
  \setlength\LLY{\calfactor}
  \setlength\overlaywidth{\paperwidth}
  \addtolength\overlaywidth{-\panelwidth}
  \setlength\URX{\overlaywidth-2\calfactor}
  \setlength\URY{\paperheight-2\calfactor}
  \PDFSCR@Info{left panel options loaded}
\or%ifnum\thepanel=2
  \setlength\Textmarginleft{\marginleft}
  \setlength\Textmarginright{\panelwidth}
  \addtolength\Textmarginright{\marginright}
  \setlength\Textmargintop{\margintop}
  \setlength\Textmarginbottom{\marginbottom}
  \setlength\LLX{\calfactor}
  \setlength\LLY{\calfactor}
  \setlength\overlaywidth{\paperwidth}
  \addtolength\overlaywidth{-\panelwidth}
  \setlength\URX{\overlaywidth-2\calfactor}
  \setlength\URY{\paperheight-2\calfactor}
  \PDFSCR@Info{right panel options loaded}
\or\PDFSCR@Warning{Panel specification is undefined}
\fi
\marginsize{\Textmarginleft}{\Textmarginright}
           {\Textmargintop}{\Textmarginbottom}
\InitLayout
\PDFSCR@Info{LLX=\the\LLX \MessageBreak
  LLY=\the\LLY \MessageBreak
  URX=\the\URX \MessageBreak
  URY=\the\URY \MessageBreak
  panelwidth=\the\panelwidth \MessageBreak
  overlaywidth=\the\overlaywidth \MessageBreak
  textwidth=\the\textwidth \MessageBreak
  textheight=\the\textheight \MessageBreak
  paperwidth=\the\paperwidth \MessageBreak
  paperheight=\the\paperheight \MessageBreak
  calfactor=\the\calfactor \MessageBreak
  Panel=\thepanel}
}           
%
% ------------------ overlaying of images or colors --------
%
\let\@PDFSout@Hook\@empty
\newcommand{\PDFSout}{\g@addto@macro\@PDFSout@Hook}
\newcommand{\@PDFSout@Out}{%
   \afterassignment\@PDFSout@Test
   \global\setbox\@cclv= %
   }
\newcommand{\@PDFSout@Test}{%
   \ifvoid\@cclv\relax
      \aftergroup\@PDFSout@Output
   \else
      \@PDFSout@Output
   \fi%
   }
\newcommand{\@PDFSout@Output}{%
   \@PDFSout@Hook%
   \@PDFSout@Org@Out\box\@cclv%
   }
\newcommand{\@PDFSout@Org@Out}{}
\newcommand*{\@PDFSout@Init}{%
   \let\@PDFSout@Org@Out\shipout
   \let\shipout\@PDFSout@Out
   }
\AtBeginDocument{\@PDFSout@Init}
\newcommand{\@Overlay@Hook}{}
\newcommand{\AddToOverlay}{\g@addto@macro\@Overlay@Hook}
\newcommand{\ClearOverlay}{\let\@Overlay@Hook\@empty}
\newcommand{\@Overlay}{%
  \ifx\@Overlay@Hook\@empty
  \else
    \bgroup
      \@tempdima=1in
      \@tempcnta=\@tempdima
      \@tempcntb=-\@tempdima
      \advance\@tempcntb\paperheight
      \global\setbox\@cclv\vbox{%
      \vbox{\let\protect\relax%
        \unitlength=1sp%
        \pictur@(0,0)(\@tempcnta,\@tempcntb)%
          \@Overlay@Hook%
        \endpicture}%
        \box\@cclv%
      }%
    \egroup
  \fi
}
\PDFSout{\@Overlay}
%------------------- end of overlaying macros --------------
%
%------------------- Panel TOC macros ----------------------
%
\if@paneltoc
\PDFSCR@Info{Panel TOC options loaded}
\RequirePackage{truncate}
\newcounter{NUM}[page]
\def\numberline#1{}
\def\ST{\hbox{\vrule height8pt depth3pt width\z@}\scriptsize\itshape}
\def\scrShadowButton#1#2{\begingroup\fboxsep0pt\fboxrule.6pt\shadowsize.1pt%
       \sffamily\color{buttonshadow}\shadowbox{\colorbox{buttonbackground}%
       {\hbox to #1{\color{fgcolor}\ST#2\hfill}}\color{buttonshadow}}\endgroup}
\def\scrNormalButton#1#2{\begingroup\sffamily\color{white}%
         \noindent{\colorbox{panelbackground}%
       {\hbox to #1{\color{fgcolor}\ST\hfill#2\hfill}}}\endgroup}
\def\@@secHead{section}
\long\def\contentsline#1#2#3#4{\def\@@cHead{#1}%
   \ifx\@@cHead\@@secHead\stepcounter{NUM}%
   \ifnum\thepanel@section=\theNUM%
   {\definecolor{panelbackground}{gray}{.3}%
    \definecolor{fgcolor}{gray}{1}%
    \hyperlink{#4}{\,\scrNormalButton{.965\panelwidth}{\truncate{.9\panelwidth}{#2}}}%
   }\par\vskip1truept%
   \else
   {\definecolor{panelbackground}{rgb}{.741, .718, .42}%%
    \definecolor{fgcolor}{gray}{0}%
    \hyperlink{#4}{\,\scrNormalButton{.965\panelwidth}{\truncate{.9\panelwidth}{#2}}}%
   }\par\vskip1truept%
   \fi\fi}
 \newcounter{@TOC}
 \def\PDF@@TOC{\stepcounter{@TOC}\ifnum\the@TOC>1\relax%
      \else\tableofcontents\fi}
\def\@panel@toc{\vbox\bgroup\rightskip0pt plus 1fill
    \hbadness 10000
    \InputIfFileExists{\jobname.toc}%
        {\PDFSCR@Info{TOC file read}}%
        {\PDFSCR@Warning{TOC file not available}%
        \AtEndDocument{\PDF@@TOC}}%
       \egroup}
\fi% --- end of paneltoc option ---

\def\overlay#1{\gdef\@overlay{#1}}
\def\overlayempty{\let\@overlay\@empty}
\let\@overlay\@empty
\def\backgroundcolor#1{\gdef\@backgroundcolor{#1}}
\backgroundcolor{lightcyan}
\definecolor{lightcyan}{rgb}{.895,.93,.916}
\newdimen\overlayheight
\newdimen\overlaywidth
\AddToOverlay{%
   \setlength{\@tempdima}{0pt}
   \setlength{\@tempdimb}{\paperwidth-2\@tempdima}
   \setlength{\@tempdimc}{\paperheight-2\@tempdima}
   \setlength{\unitlength}{1pt}\thinlines%
   \ifx\@overlay\@empty%
    \PDFSCR@Warning{No overlay specified\MessageBreak
     output will have only background color}
     \put(\strip@pt\LLX,\strip@pt\LLY){%
     \colorbox{\@backgroundcolor}{%
       \color{white}\makebox(\strip@pt\URX,\strip@pt\URY)%
       {}}}
   \else
    \ifnum\thepanel=1
     \put(\strip@pt\@tempdima,\strip@pt\@tempdima){%
      \makebox(\strip@pt\@tempdimb,\strip@pt\@tempdimc)[cr]%
      {\includegraphics[width=\overlaywidth,height=\paperheight]{\@overlay}}}%
    \else
    \ifnum\thepanel=2
     \put(\strip@pt\@tempdima,\strip@pt\@tempdima){%
      \makebox(\strip@pt\@tempdimb,\strip@pt\@tempdimc)[cl]%
      {\includegraphics[width=\overlaywidth,height=\paperheight]{\@overlay}}}%
    \else
     \put(\strip@pt\@tempdima,\strip@pt\@tempdima){%
      \makebox(\strip@pt\@tempdimb,\strip@pt\@tempdimc)[cc]%
      {\includegraphics[width=\overlaywidth,height=\paperheight]{\@overlay}}}%
    \fi\fi
   \fi%
  }%
\AddToOverlay{%
    \setlength{\@tempdima}{0mm}%
    \setlength{\@tempdimb}{\paperwidth-2\@tempdima}%
    \setlength{\@tempdimc}{\paperheight-2\@tempdima}%
    \setlength{\unitlength}{1pt}\thinlines%
     \put(\strip@pt\@tempdima,\strip@pt\@tempdima){%
      \makebox(\strip@pt\@tempdimb,\strip@pt\@tempdimc)%
      {\relax\@@@PANEL\relax}}%
}

%
\def\@@@PANEL{\ifnum\thepanel=1\@panel\hfill\else%
       \ifnum\thepanel=2\hfill\@panel\else%
       \ifnum\thepanel=0\relax%
       \fi\fi\fi}%
%      
\def\@logo#1{%
       \global\setbox0=\hbox{\includegraphics{#1}}%
       \ifdim\ht0>\wd0%
        \includegraphics[height=.75in]{#1}%
        \else%
       \ifdim\wd0>\ht0%
        \includegraphics[width=.75in]{#1}%
        \else%
       \ifdim\wd0=\ht0%%
        \includegraphics[width=.75in]{#1}%
       \fi\fi\fi
}
\let\@@logo\@logo
\def\ps@plain{}
\def\ps@empty{}
\def\ps@firstpage{}
\def\ps@headings{}
\def\ps@myheadings{}
\def\ps@title{}

\AtEndDocument{%
   \clearpage   \addtocounter{page}{-1}%
   \immediate\write\@auxout{\string\gdef\string\ScreenLastPage{\arabic{page}}}%
   \addtocounter{page}{1}}

%------------------- Section counter coloring ----------------------

\let\old@secnumber\@secnumber
  \def\@secnumber{\protect\textcolor{section\thesection@level}{\old@secnumber}}%
  \def\@seccntformat#1{\protect\textcolor{section\thesection@level}%
     {\expandafter\upshape\csname the#1\endcsname}\quad}%
  \def\@secnumfont{\protect\textcolor{section\thesection@level}}%\mdseries}
  \def\abstractname{\protect\textcolor{blue}{\@Panelabstractname}}
  \let\o@title\@title
  \def\@title{\protect\color{orange}\o@title}

  \def\Sectionformat#1#2{%
   \ifcase#2%
        {\protect\textcolor{section0}{#1}}%level 0 chapter        { }
    \or {\protect\textcolor{section1}{#1}}%level 1 section        { }
    \or {\protect\textcolor{section2}{#1}}%level 2 subsection     { }
    \or {\protect\textcolor{section3}{#1}}%level 3 subsubsection  { }
    \or {\protect\textcolor{section4}{#1}}%level 4 paragraph      { }
    \or {\protect\textcolor{section5}{#1}}%level 5 subparagraph   { }
   \fi
  }

  \let\scr@section\section
  \newcounter{panel@section}
 \def\section{\if@sectionbreak\clearpage\fi%
     \stepcounter{panel@section}\scr@section}
 \def\@linkcolor{red}
 \def\@anchorcolor{section0}
 \def\@citecolor{orange}
 \def\@filecolor{cyan}
 \def\@urlcolor{magenta}
 \def\@menucolor{section2}
 \def\@pagecolor{red}
 \setcounter{tocdepth}{4}
 \setcounter{secnumdepth}{4}
\ifnum\thedriver=0
 \def\pagedissolve#1{%
     \edef\@@processme{%
     \pdfpageattr{%
        /Trans << /S /#1\space >>%
      }}%
     \@@processme 
    }%
\else
 \def\pagedissolve#1{}
\fi
\if@nocfg\relax\else\IfFileExists{pdfscreen.cfg}{\input pdfscreen.cfg}{}\fi
\let\notesname\@gobble
\newcounter{slide}
\newcounter{slideoverlay}
\newenvironment{slide}{%
  \stepcounter{slide}%
  \stepcounter{slideoverlay}%
  \ifnum\theslideoverlay=11\setcounter{slideoverlay}{1}
   \ifx\@overlay\@empty\else
    \PDFSCR@Warning{Overly counter reset to zero}\fi\fi
   \ifx\@overlay\@empty\else 
   \PDFSCR@Warning{Overly file is \@overlay.pdf}\fi
 \noindent\begin{minipage}[c][\textheight][c]{\textwidth}
 \newcommand\realnormalsize{%
   \@setfontsize\realnormalsize\@xiipt{14.5}%
   \abovedisplayskip 12\p@ \@plus3\p@ \@minus7\p@
   \abovedisplayshortskip \z@ \@plus3\p@
   \belowdisplayshortskip 6.5\p@ \@plus3.5\p@ \@minus3\p@
   \belowdisplayskip \abovedisplayskip
   }
 \newcommand\realsmall{%
   \@setfontsize\realsmall\@xipt{13.6}%
   \abovedisplayskip 11\p@ \@plus3\p@ \@minus6\p@
   \abovedisplayshortskip \z@ \@plus3\p@
   \belowdisplayshortskip 6.5\p@ \@plus3.5\p@ \@minus3\p@
   }
 \newcommand\realfootnotesize{%
   \@setfontsize\realfootnotesize\@xpt\@xiipt
   \abovedisplayskip 10\p@ \@plus2\p@ \@minus5\p@
   \abovedisplayshortskip \z@ \@plus3\p@
   \belowdisplayshortskip 6\p@ \@plus3\p@ \@minus3\p@
   }
 \newcommand\realscriptsize{\@setfontsize\realscriptsize\@viiipt{9.5}}
 \newcommand\realtiny{\@setfontsize\realtiny\@vipt\@viipt}
 \newcommand\reallarge{\@setfontsize\reallarge\@xivpt{18}}
 \newcommand\realLarge{\@setfontsize\realLarge\@xviipt{22}}
 \newcommand\realLARGE{\@setfontsize\realLARGE\@xxpt{25}}
 \newcommand\realhuge{\@setfontsize\realhuge\@xxvpt{30}}
 \let\realHuge=\realhuge
 \renewcommand\normalsize{%
    \@setfontsize\normalsize{16}{19.2}%
    \abovedisplayskip 14\p@ \@plus3\p@ \@minus7\p@
    \abovedisplayshortskip \z@ \@plus3\p@
    \belowdisplayshortskip 7.5\p@ \@plus3.5\p@ \@minus3\p@
    \belowdisplayskip \abovedisplayskip
    }
 \normalsize
 \renewcommand\small{%
    \@setfontsize\small{13}{14.5}%
    \abovedisplayskip 13\p@ \@plus3\p@ \@minus6\p@
    \abovedisplayshortskip \z@ \@plus3\p@
    \belowdisplayshortskip 6.5\p@ \@plus3.5\p@ \@minus3\p@
 }
 \renewcommand\footnotesize{%
    \@setfontsize\footnotesize\@xiipt{14}
    \abovedisplayskip 12\p@ \@plus2\p@ \@minus5\p@
    \abovedisplayshortskip \z@ \@plus3\p@
    \belowdisplayshortskip 6\p@ \@plus3\p@ \@minus3\p@
 }
 \renewcommand\scriptsize{\@setfontsize\scriptsize\@xpt{11.2}}
 \renewcommand\tiny{\@setfontsize\tiny\@ixpt{10.2}}
 \renewcommand\large{\@setfontsize\large{17.28}{22}}
 \renewcommand\Large{\@setfontsize\Large\@xxvpt{30}}
 \renewcommand\LARGE{\@setfontsize\LARGE{30}{36}}
 \renewcommand\huge{\@setfontsize\huge{40}{48}}
 \let\Huge=\huge
}
{\end{minipage}}
%
\long\def\buttonbox#1{%
  \leavevmode
  \setbox\@tempboxa\hbox{%
    \color@begingroup
      \kern\fboxsep{#1}\kern\fboxsep
    \color@endgroup}%
  \@buttonframeb@x\relax}
%
\def\@buttonframeb@x#1{\begingroup%
  \@tempdima\fboxrule
  \advance\@tempdima\fboxsep
  \advance\@tempdima\dp\@tempboxa
  \hbox{%
    \lower\@tempdima\hbox{%
      \vbox{%
        \color{white}\hrule\@height\fboxrule\relax
        \hbox{%
          \color{white}\vrule\@width\fboxrule\relax
          #1%
          \vbox{%
            \vskip\fboxsep
            \box\@tempboxa
            \vskip\fboxsep}%
          #1%
          \color{black}\vrule\@width\fboxrule\relax}%
          \color{black}\hrule\@height\fboxrule\relax}%
                          }%
        }%
\endgroup}
%
\def\@pdfcreator{LaTeX with hyperref and pdfscreen}
\def\shorttitle#1{\gdef\@shorttitle{#1}}
\let\@shorttitle\@empty
\def\@battrib{\color{white}$\bullet$\sffamily\footnotesize\itshape}
\def\@vattrib{\color{section1}\sffamily\footnotesize\itshape}
\newif\if@@bb \@@bbfalse
\newif\if@@tb \@@tbfalse
\def\topbuttons{\@@tbtrue%
 \AddToOverlay{\def\@@tbuttons{\@@buttons}%
  \setlength{\unitlength}{1pt}\thinlines%
   \put(0,0){\makebox(\strip@pt\paperwidth,\strip@pt\paperheight)[ct]%
     {\@@tbuttons}%
    }
  }
}
\def\bottombuttons{\@@bbtrue%
  \AddToOverlay{\def\@@bbuttons{\@@buttons}%
   \setlength{\unitlength}{1pt}\thinlines%
    \put(0,0){\makebox(\strip@pt\paperwidth,24)[cb]%
     {\@@bbuttons}%
  }
 }
}
\def\@@buttons{\ifx\@shorttitle\@empty\relax\else%
       \quad{\@vattrib\@shorttitle}\fi\hfill%
       \Acrobatmenu{FirstPage} {\@battrib First }         
       \Acrobatmenu{PrevPage}  {\@battrib Prev }          
       \Acrobatmenu{NextPage}  {\@battrib Next }          
       \Acrobatmenu{LastPage}  {\@battrib Last }          
       \Acrobatmenu{GoBack}    {\@battrib Go Back }       
       \Acrobatmenu{FullScreen}{\@battrib Full Screen }   
       \Acrobatmenu{Close}     {\@battrib Close }         
       \Acrobatmenu{Quit}      {\@battrib Quit }          
\quad{}\vspace*{1.5pt}}
\def\nobottombuttons{\let\@@bbuttons\relax}
\def\notopbuttons{\let\@@tbuttons\relax}
%
\newcounter{overlay}
\def\changeoverlay{\def\section{\if@sectionbreak\clearpage\fi%
    \stepcounter{panel@section}%
    \change\scr@section}}%
 \def\change{\stepcounter{overlay}%
  \ifnum\c@overlay>10\setcounter{overlay}{1}\fi
   \overlay{overlay\theoverlay}
}
%    
\fi%--This \fi corresponds to \if@screen
%-------- Screen options end here ------------------
%
%
%-------- Print options start here -----------------
%
\if@print
\RequirePackage{amssymb}
\RequirePackage[pdftex,bookmarksopen,colorlinks]{hyperref}
\def\pagedissolve#1{}
\let\overlay\@gobble
\let\paneloverlay\@gobble
\let\emblema\@gobble
\let\emblemb\@gobble
\let\urlid\@gobble
\let\emailid\@gobble
\def\screensize#1#2{}
\includecomment{print}
\excludecomment{screen}
 \def\@linkcolor{black}
 \def\@anchorcolor{black}
 \def\@citecolor{black}
 \def\@filecolor{black}
 \def\@urlcolor{black}
 \def\@menucolor{black}
 \def\@pagecolor{black}
 \definecolor{section0}{gray}{0}
 \definecolor{section1}{gray}{0}
 \definecolor{section2}{gray}{0}
 \definecolor{section3}{gray}{0}
 \definecolor{section4}{gray}{0}
 \definecolor{section5}{gray}{0}
 \definecolor{orange}{gray}{0}
 \definecolor{panelbackground}{gray}{1}
 \definecolor{buttondisable}{gray}{.8}
 \def\margins#1#2#3#4{}
 \RequirePackage{fancybox}
\newdimen\@PDFmpht
\let\@Notesname\@empty
\def\notesname#1{\gdef\@Notesname{#1}}
\let\@overlay\@empty
\newcounter{slide}
\newcounter{slideoverlay}
\newenvironment{slide}{\stepcounter{slide}%
      \stepcounter{slideoverlay}%
   \ifnum\theslideoverlay=11\setcounter{slideoverlay}{1}
    \ifx\@overlay\@empty\else
    \PDFSCR@Warning{Overly counter reset to zero}\fi\fi
   \ifx\@overlay\@empty\else 
    \PDFSCR@Warning{Overly file is Not available in print}\fi
      \par\addvspace{12pt}\noindent%
      \hspace*{-.1\paperwidth}\begin{minipage}{.9\paperwidth}
       \global\setbox0=\hbox\bgroup\begin{minipage}[b]{.5\linewidth}}%
       {\end{minipage}\egroup\setlength\@PDFmpht{\the\ht0}%
       \typeout{****** height=\the\@PDFmpht*******}
       \setbox1=\hbox{\begin{minipage}[b][1.05\@PDFmpht][t]{.3\paperwidth}
       \typeout{****** height=\the\@PDFmpht*******}
        \centering \@Notesname\par\vfill\end{minipage}}
       \noindent\parbox{\linewidth}{%\shadowsize=2pt\fboxsep=6pt%
       \shadowbox{\box0}\quad\fbox{\box1}}
       \end{minipage}\hspace*{-1.5in}}

 \let\overlayempty\relax
 \let\paneloverlayempty\relax
 \let\topbuttons\relax
 \let\notopbuttons\relax
 \let\bottombuttons\relax
 \let\nobottombuttons\relax
 \let\changeoverlay\relax
%------------------------ Macros for code listing --------------
\if@code
\def\verbatim@font{%
  \normalfont \ttfamily\small
  \catcode`\<=\active
  \catcode`\>=\active
}
\begingroup
  \catcode`\<=\active
  \catcode`\>=\active
  \gdef<{\@ifnextchar<\@lt\@meta}
  \gdef>{\@ifnextchar>\@gt\@gtr@err}
  \gdef\@meta#1>{\@PDFm{#1}}
  \gdef\@lt<{\char`\<}
  \gdef\@gt>{\char`\>}
\endgroup
\def\@gtr@err{%
   \PDFSCR@Warning{%
      Isolated \protect>\MessageBreak%
      In this document class, \protect<...\protect>\MessageBreak
      is used to indicate a parameter.\MessageBreak
      I've just found a \protect> on its own.\MessageBreak
      Perhaps you meant to type \protect>\protect>?
   }%
}
\def\verbatim@nolig@list{\do\`\do\,\do\'\do\-}
\def\@PDFm#1{\mbox{$\langle$\it#1\/$\rangle$}}
\def\arg#1{{{\tt\string{}\@PDFm{#1}{\tt\string}}}}
\def\@PDFM#1{\mbox{\it#1\/}}
\def\Arg#1{{{\tt\string{}\@PDFM{#1}{\tt\string}}}}
\def\oarg#1{{\tt[}\@PDFm{#1}{\tt]}}
\def\Oarg#1{{\tt[}\@PDFM{#1}{\tt]}}
\@ifundefined{decl}{%
\newenvironment{decl}[1][]%
    {\par\small\addvspace{1.5ex plus .5ex minus .5ex}%
     \vskip -\parskip
     \noindent\hspace{-\leftmarginii}%
     \bgroup\begin{tabular}{|l|}\hline\\[-6pt]
      \ignorespaces}%
    {\\[3pt]\hline\end{tabular}\egroup\par%
     \vspace{1.5ex}\ignorespacesafterend\noindent}}{}
\RequirePackage{shortvrb}
\MakeShortVerb{\|}
\fi
%-------------- end of \if@code option ----------
%
\def\panelfont{\fontsize{7pt}{7pt}\itshape\selectfont}
\def\st{\hbox{\vrule height10pt depth5pt width\z@}\panelfont}
\def\addButton#1#2{\begingroup\normalsfcodes\fboxsep2pt\fboxrule.1pt%
       \sffamily\fbox{\hbox to #1{\hfil\st#2\hfil}}\endgroup}
\def\imageButton#1#2#3{\includegraphics[width=#1,height=#2]{#3}}       
\setcounter{tocdepth}{4}
\setcounter{secnumdepth}{4}
\fi
%%
\endinput
%%
%% End of file pdfscreen.sty
%%
