# Supplementary material for: Precipitation pattern in the Western Himalayas revealed by four datasets
Source: Copernicus journal article supplement (doi:10.5194/hess-22-5097-2018), 2018-10-04
Supplement: Supplementary file 1 [file hess-22-5097-2018-supplement.zip › README_copernicus_package_4_3.txt]

File: README_copernicus_package_4_3.txt
-------------------------------------------------------------------------
This is a README file for the Copernicus Publications LaTeX Macro Package 
copernicus_package.zip in the version 4.3, 2 September 2016
-------------------------------------------------------------------------
It consists of several files, each with its separate copyright.
This specific archive is collected for journals published by 
Copernicus Publications (Copernicus GmbH).

Copyright (C) 2016 Copernicus GmbH

E-mail: publications@copernicus.org
URL:   	http://publications.copernicus.org


Content:
- copernicus.cls: The LaTeX2e class file designed for Copernicus Publications journals. Current Version 8.15, 16 August 2016
- copernicus.cfg: The configuration file containing journal-specific information used by the class file. Last update 30 November 2015
- copernicus.bst: The bibliographic style file for BibTeX. Current Version 1.1, April 2007 
- natbib.sty
- pdfscreencop.sty / pdfscreen.sty
- template.tex: A LaTeX template in journal style.
