# Supplementary material for: Precipitation pattern in the Western Himalayas revealed by four datasets
Source: Copernicus journal article supplement (doi:10.5194/hess-22-5097-2018), 2018-10-04
Supplement: Supplementary file 1 [file hess-22-5097-2018-supplement.zip › template.aux]

\relax 
\providecommand\hyper@newdestlabel[2]{}
\providecommand\HyperFirstAtBeginDocument{\AtBeginDocument}
\HyperFirstAtBeginDocument{\ifx\hyper@anchor\@undefined
\global\let\oldcontentsline\contentsline
\gdef\contentsline#1#2#3#4{\oldcontentsline{#1}{#2}{#3}}
\global\let\oldnewlabel\newlabel
\gdef\newlabel#1#2{\newlabelxx{#1}#2}
\gdef\newlabelxx#1#2#3#4#5#6{\oldnewlabel{#1}{{#2}{#3}}}
\AtEndDocument{\ifx\hyper@anchor\@undefined
\let\contentsline\oldcontentsline
\let\newlabel\oldnewlabel
\fi}
\fi}
\global\let\hyper@last\relax 
\gdef\HyperFirstAtBeginDocument#1{#1}
\providecommand\HyField@AuxAddToFields[1]{}
\providecommand\HyField@AuxAddToCoFields[2]{}
\citation{Hegdahl2016}
\citation{Li2015}
\citation{Menegoz2013}
\citation{Yatagai2012}
\citation{Menegoz2013}
\citation{Palazzi2013}
\citation{Yin2008}
\citation{Yang1998}
\citation{Menegoz2013}
\citation{Dee2011}
\citation{Dee2011}
\select@language{english}
\@writefile{toc}{\select@language{english}}
\@writefile{lof}{\select@language{english}}
\@writefile{lot}{\select@language{english}}
\@LN{0}{0}
\@LN{1}{0}
\@LN{2}{0}
\@LN{3}{0}
\@LN{4}{0}
\@LN{5}{0}
\@LN{6}{0}
\@LN{7}{0}
\@LN{8}{0}
\@LN{9}{0}
\@LN{10}{0}
\@LN{11}{0}
\@LN{12}{0}
\@LN{13}{0}
\@LN{14}{0}
\@writefile{toc}{\contentsline {section}{\numberline {1}Introduction}{1}{section.1}}
\@LN{15}{0}
\@LN{16}{0}
\@LN{17}{0}
\@LN{18}{0}
\@LN{19}{0}
\@LN{20}{0}
\@LN{21}{0}
\@LN{22}{0}
\@LN{23}{0}
\@LN{24}{1}
\@LN{25}{1}
\@LN{26}{1}
\@LN{27}{1}
\@LN{28}{1}
\@LN{29}{1}
\@LN{30}{1}
\@LN{31}{1}
\@LN{32}{1}
\@LN{33}{1}
\@LN{34}{1}
\@LN{35}{1}
\@LN{36}{1}
\@LN{37}{1}
\@LN{38}{1}
\@LN{39}{1}
\@LN{40}{1}
\@LN{41}{1}
\@LN{42}{1}
\@LN{43}{1}
\@LN{44}{1}
\@LN{45}{1}
\@LN{46}{1}
\@LN{47}{1}
\@LN{48}{1}
\@LN{49}{1}
\@LN{50}{1}
\@LN{51}{1}
\@LN{52}{1}
\@LN{53}{1}
\@LN{54}{1}
\@LN{55}{1}
\@LN{56}{1}
\@LN{57}{1}
\citation{Purohit2016}
\citation{Menegoz2013}
\citation{shepard1968two}
\citation{rajeevan2006high}
\citation{Bollasina2011}
\citation{Wiltshire2014}
\citation{Goswami2006}
\citation{rajeevan2006high}
\citation{Yatagai2012}
\citation{Yatagai2012}
\citation{Yatagai2012}
\citation{Pechlivanidis2015}
\citation{Xu2016}
\citation{Kamiguchi2010}
\citation{Dimri2013}
\citation{Menegoz2013}
\@LN{58}{2}
\@writefile{toc}{\contentsline {section}{\numberline {2}Study Area}{3}{section.2}}
\@LN{59}{2}
\@LN{60}{2}
\@LN{61}{2}
\@LN{62}{2}
\@LN{63}{2}
\@LN{64}{2}
\@LN{65}{2}
\@LN{66}{2}
\@LN{67}{2}
\@LN{68}{2}
\@LN{69}{2}
\@LN{70}{2}
\@LN{71}{2}
\@LN{72}{2}
\@writefile{toc}{\contentsline {section}{\numberline {3}Data}{3}{section.3}}
\@LN{73}{2}
\@writefile{toc}{\contentsline {subsection}{\numberline {3.1}IMD dataset}{3}{subsection.3.1}}
\newlabel{DataIMD}{{3.1}{3}{IMD dataset}{subsection.3.1}{}}
\@LN{74}{2}
\@LN{75}{2}
\@LN{76}{2}
\@LN{77}{2}
\@LN{78}{2}
\@LN{79}{2}
\@LN{80}{2}
\@LN{81}{2}
\@LN{82}{2}
\@LN{83}{2}
\@LN{84}{2}
\@LN{85}{2}
\@writefile{toc}{\contentsline {subsection}{\numberline {3.2}APHRODITE dataset}{3}{subsection.3.2}}
\@LN{86}{2}
\@LN{87}{2}
\@LN{88}{2}
\citation{Dee2011}
\citation{Dee2011}
\citation{Dimri2013}
\citation{Katragkou2015}
\citation{Maussion2011}
\citation{li2016evaluating}
\citation{Li2014b}
\@LN{89}{3}
\@LN{90}{3}
\@LN{91}{3}
\@LN{92}{3}
\@LN{93}{3}
\@LN{94}{3}
\@LN{95}{3}
\@LN{96}{3}
\@writefile{toc}{\contentsline {subsection}{\numberline {3.3}ERA-interim dataset}{4}{subsection.3.3}}
\@LN{97}{3}
\@LN{98}{3}
\@LN{99}{3}
\@LN{100}{3}
\@LN{101}{3}
\@LN{102}{3}
\@LN{103}{3}
\@LN{104}{3}
\@writefile{toc}{\contentsline {subsection}{\numberline {3.4}WRF dataset}{4}{subsection.3.4}}
\@LN{105}{3}
\@LN{106}{3}
\@LN{107}{3}
\@LN{108}{3}
\@LN{109}{3}
\@LN{110}{3}
\@LN{111}{3}
\@LN{112}{3}
\@LN{113}{3}
\@LN{114}{3}
\@LN{115}{3}
\@LN{116}{3}
\citation{Li2014b}
\citation{Henn2015}
\citation{Kretzschmar2016}
\citation{li2016evaluating}
\citation{Yatagai2012}
\citation{Yatagai2012}
\citation{rajeevan2006high}
\citation{Menegoz2013}
\citation{Dimri2013}
\citation{Bookhagen2006}
\citation{Dimri2013a}
\citation{Srinivas2013}
\citation{li2016evaluating}
\citation{Maussion2011}
\@LN{117}{4}
\@writefile{toc}{\contentsline {subsection}{\numberline {3.5}Gauge data}{5}{subsection.3.5}}
\@LN{118}{4}
\@LN{119}{4}
\@LN{120}{4}
\@LN{121}{4}
\@LN{122}{4}
\@LN{123}{4}
\@LN{124}{4}
\@writefile{toc}{\contentsline {subsection}{\numberline {3.6}Discharge}{5}{subsection.3.6}}
\@LN{125}{4}
\@LN{126}{4}
\@LN{127}{4}
\@LN{128}{4}
\@LN{129}{4}
\@LN{130}{4}
\@LN{131}{4}
\@LN{132}{4}
\@LN{133}{4}
\@LN{134}{4}
\@LN{135}{4}
\@LN{136}{4}
\@LN{137}{4}
\@writefile{toc}{\contentsline {subsection}{\numberline {3.7}Evaporation}{5}{subsection.3.7}}
\@LN{138}{4}
\@LN{139}{4}
\@LN{140}{4}
\@LN{141}{4}
\@LN{142}{4}
\@LN{143}{4}
\@writefile{toc}{\contentsline {section}{\numberline {4}Results}{5}{section.4}}
\@LN{144}{4}
\@writefile{toc}{\contentsline {subsection}{\numberline {4.1}Spatial variations}{5}{subsection.4.1}}
\@LN{145}{4}
\@LN{146}{4}
\@LN{147}{5}
\@LN{148}{5}
\@LN{149}{5}
\@LN{150}{5}
\@LN{151}{5}
\@LN{152}{5}
\@LN{153}{5}
\@LN{154}{5}
\@LN{155}{5}
\@LN{156}{5}
\@LN{157}{5}
\@LN{158}{5}
\@LN{159}{5}
\@LN{160}{5}
\@LN{161}{5}
\@LN{162}{5}
\@LN{163}{5}
\@LN{164}{5}
\@LN{165}{5}
\@LN{166}{5}
\@LN{167}{5}
\@LN{168}{5}
\@LN{169}{5}
\@LN{170}{5}
\@LN{171}{5}
\@LN{172}{5}
\@LN{173}{5}
\@LN{174}{5}
\@LN{175}{5}
\@LN{176}{5}
\@LN{177}{5}
\@LN{178}{5}
\@LN{179}{5}
\@LN{180}{5}
\@LN{181}{5}
\citation{Bollasina2011}
\@LN{182}{6}
\@LN{183}{6}
\@LN{184}{6}
\@writefile{toc}{\contentsline {subsection}{\numberline {4.2}Temporal variations and changes}{7}{subsection.4.2}}
\newlabel{temporal_change}{{4.2}{7}{Temporal variations and changes}{subsection.4.2}{}}
\@LN{185}{6}
\@LN{186}{6}
\@LN{187}{6}
\@LN{188}{6}
\@LN{189}{6}
\@LN{190}{6}
\@LN{191}{6}
\@LN{192}{6}
\@LN{193}{6}
\@LN{194}{6}
\@LN{195}{6}
\@LN{196}{6}
\@LN{197}{6}
\@LN{198}{6}
\@LN{199}{6}
\@LN{200}{6}
\@LN{201}{6}
\@LN{202}{6}
\@LN{203}{6}
\@LN{204}{6}
\@LN{205}{6}
\@writefile{toc}{\contentsline {section}{\numberline {5}Discussions}{7}{section.5}}
\@LN{206}{6}
\@writefile{toc}{\contentsline {subsection}{\numberline {5.1}Comparison gridded precipitation datasets with gauge data}{7}{subsection.5.1}}
\@LN{207}{6}
\@LN{208}{6}
\@LN{209}{6}
\@LN{210}{6}
\@LN{211}{6}
\@LN{212}{6}
\citation{KUMAR2007}
\citation{Azam2014}
\citation{Azam2014}
\citation{REN2017148}
\citation{AZAM2012}
\@LN{213}{7}
\@LN{214}{7}
\@LN{215}{7}
\@LN{216}{7}
\@LN{217}{7}
\@writefile{toc}{\contentsline {subsection}{\numberline {5.2}Comparison gridded precipitation datasets with runoff data}{8}{subsection.5.2}}
\@LN{218}{7}
\@LN{219}{7}
\@LN{220}{7}
\@LN{221}{7}
\@LN{222}{7}
\@LN{223}{7}
\@LN{224}{7}
\@LN{225}{7}
\@LN{226}{7}
\@LN{227}{7}
\@LN{228}{7}
\@LN{229}{7}
\@LN{230}{7}
\@LN{231}{7}
\@LN{232}{7}
\@LN{233}{7}
\@LN{234}{7}
\@LN{235}{7}
\@writefile{toc}{\contentsline {subsection}{\numberline {5.3}Implications for glaciers}{8}{subsection.5.3}}
\@LN{236}{7}
\@LN{237}{7}
\@LN{238}{7}
\@LN{239}{7}
\@LN{240}{7}
\@LN{241}{7}
\@LN{242}{7}
\@LN{243}{7}
\@LN{244}{7}
\@LN{245}{7}
\@LN{246}{8}
\@LN{247}{8}
\@LN{248}{8}
\@LN{249}{8}
\@LN{250}{8}
\@writefile{toc}{\contentsline {section}{\numberline {6}Conclusions}{9}{section.6}}
\@LN{251}{8}
\@LN{252}{8}
\@LN{253}{8}
\@LN{254}{8}
\@LN{255}{8}
\@LN{256}{8}
\@LN{257}{8}
\@LN{258}{8}
\@LN{259}{8}
\@LN{260}{8}
\@LN{261}{8}
\@LN{262}{8}
\@LN{263}{8}
\@LN{264}{8}
\@LN{265}{8}
\@LN{266}{8}
\@LN{267}{8}
\@LN{268}{8}
\@LN{269}{8}
\@LN{270}{8}
\@LN{271}{8}
\@LN{272}{8}
\@LN{273}{8}
\@LN{274}{8}
\@LN{275}{8}
\bibstyle{copernicus}
\bibdata{library}
\@LN{276}{9}
\@writefile{toc}{\contentsline {section}{\numberline {7}Code availability}{10}{section.7}}
\@LN{277}{9}
\@writefile{toc}{\contentsline {section}{\numberline {8}Data availability}{10}{section.8}}
\@LN{278}{9}
\@LN{279}{9}
\@LN{280}{9}
\@LN{281}{9}
\bibcite{AZAM2012}{{1}{2012}{{Azam et~al.}}{{Azam, Wagon, Ramanathan, Vincent, Sharma, Arnaud, Linda, Pottakkal, Chevallier, Singh, and Berthier}}}
\bibcite{Azam2014}{{2}{2014}{{Azam et~al.}}{{Azam, Wagnon, Vincent, Ramanathan, Linda, and Singh}}}
\bibcite{Bollasina2011}{{3}{2011}{{Bollasina et~al.}}{{Bollasina, Ming, and Ramaswamy}}}
\bibcite{Bookhagen2006}{{4}{2006}{{Bookhagen and Burbank}}{{}}}
\bibcite{Dee2011}{{5}{2011}{{Dee et~al.}}{{Dee, Uppala, Simmons, Berrisford, Poli, Kobayashi, Andrae, Balmaseda, Balsamo, Bauer, Bechtold, Beljaars, van~de Berg, Bidlot, Bormann, Delsol, Dragani, Fuentes, Geer, Haimberger, Healy, Hersbach, H{\'{o}}lm, Isaksen, K{\r a}llberg, K{\"{o}}hler, Matricardi, McNally, Monge-Sanz, Morcrette, Park, Peubey, de~Rosnay, Tavolato, Th{\'{e}}paut, and Vitart}}}
\bibcite{Dimri2013a}{{6}{2013}{{Dimri and Niyogi}}{{}}}
\bibcite{Dimri2013}{{7}{2013}{{Dimri et~al.}}{{Dimri, Yasunari, Wiltshire, Kumar, Mathison, Ridley, and Jacob}}}
\bibcite{Goswami2006}{{8}{2006}{{Goswami et~al.}}{{Goswami, Venugopal, Sengupta, Madhusoodanan, and Xavier}}}
\bibcite{Hegdahl2016}{{9}{2016}{{Hegdahl et~al.}}{{Hegdahl, Tallaksen, Engeland, Burkhart, and Xu}}}
\bibcite{Henn2015}{{10}{2015}{{Henn et~al.}}{{Henn, Clark, Kavetski, and Lundquist}}}
\bibcite{Kamiguchi2010}{{11}{2010}{{Kamiguchi et~al.}}{{Kamiguchi, Arakawa, Kitoh, Yatagai, Hamada, and Yasutomi}}}
\bibcite{Katragkou2015}{{12}{2015}{{Katragkou et~al.}}{{Katragkou, Garc\'{i}a-D\'{i}ez, Vautard, Sobolowski, Zanis, Alexandri, Cardoso, Colette, Fernandez, Gobiet, Goergen, Karacostas, Knist, Mayer, Soares, Pytharoulis, Tegoulias, Tsikerdekis, and Jacob}}}
\bibcite{Kretzschmar2016}{{13}{2016}{{Kretzschmar et~al.}}{{Kretzschmar, Tych, Chappell, and Beven}}}
\bibcite{KUMAR2007}{{14}{2007}{{Kumar et~al.}}{{Kumar, Singh, and Singh}}}
\bibcite{Li2014b}{{15}{2015{a}}{{Li et~al.}}{{Li, Beldring, Xu, Huss, Melvold, and Jain}}}
\bibcite{Li2015}{{16}{2015{b}}{{Li et~al.}}{{Li, Xu, Beldring, Tallaksen, and Jain}}}
\@LN{282}{10}
\@LN{283}{10}
\@LN{284}{10}
\@LN{285}{10}
\@LN{286}{10}
\@LN{287}{10}
\@LN{288}{10}
\@LN{289}{10}
\@LN{290}{10}
\@LN{291}{10}
\@LN{292}{10}
\@LN{293}{10}
\@LN{294}{10}
\@LN{295}{10}
\@LN{296}{10}
\@LN{297}{10}
\@LN{298}{10}
\@LN{299}{10}
\@LN{300}{10}
\@LN{301}{10}
\@LN{302}{10}
\@LN{303}{10}
\@LN{304}{10}
\@LN{305}{10}
\@LN{306}{10}
\@LN{307}{10}
\@LN{308}{10}
\@LN{309}{10}
\@LN{310}{10}
\@LN{311}{10}
\@LN{312}{10}
\@LN{313}{10}
\@LN{314}{10}
\@LN{315}{10}
\@LN{316}{10}
\@LN{317}{10}
\@LN{318}{10}
\bibcite{li2016evaluating}{{17}{2016}{{Li et~al.}}{{Li, Gochis, Sobolowski, and Mesquita}}}
\bibcite{Maussion2011}{{18}{2011}{{Maussion et~al.}}{{Maussion, Scherer, Finkelnburg, Richters, Yang, and Yao}}}
\bibcite{Menegoz2013}{{19}{2013}{{M{\'{e}}n{\'{e}}goz et~al.}}{{M{\'{e}}n{\'{e}}goz, Gall{\'{e}}e, and Jacobi}}}
\bibcite{Palazzi2013}{{20}{2013}{{Palazzi et~al.}}{{Palazzi, von Hardenberg, and Provenzale}}}
\bibcite{Pechlivanidis2015}{{21}{2015}{{Pechlivanidis and Arheimer}}{{}}}
\bibcite{Purohit2016}{{22}{2016}{{Purohit and Kau}}{{}}}
\bibcite{rajeevan2006high}{{23}{2006}{{Rajeevan et~al.}}{{Rajeevan, Bhate, Kale, and Lal}}}
\bibcite{REN2017148}{{24}{2017}{{Ren et~al.}}{{Ren, Ren, Sun, Shrestha, You, Zhan, Rajbhandari, Zhang, and Wen}}}
\bibcite{shepard1968two}{{25}{1968}{{Shepard}}{{}}}
\bibcite{Srinivas2013}{{26}{2013}{{Srinivas et~al.}}{{Srinivas, Hariprasad, {Bhaskar Rao}, Anjaneyulu, Baskaran, and Venkatraman}}}
\bibcite{Wiltshire2014}{{27}{2014}{{Wiltshire}}{{}}}
\bibcite{Xu2016}{{28}{2016}{{Xu et~al.}}{{Xu, Xu, Chen, and Chen}}}
\bibcite{Yang1998}{{29}{1998}{{Yang et~al.}}{{Yang, Goodison, Ishida, and Benson}}}
\bibcite{Yatagai2012}{{30}{2012}{{Yatagai et~al.}}{{Yatagai, Kamiguchi, Arakawa, Hamada, Yasutomi, and Kitoh}}}
\bibcite{Yin2008}{{31}{2008}{{Yin et~al.}}{{Yin, Zhang, Liu, Colella, and Chen}}}
\@LN{319}{11}
\@LN{320}{11}
\@LN{321}{11}
\@LN{322}{11}
\@LN{323}{11}
\@LN{324}{11}
\@LN{325}{11}
\@LN{326}{11}
\@LN{327}{11}
\@LN{328}{11}
\@LN{329}{11}
\@LN{330}{11}
\@LN{331}{11}
\@LN{332}{11}
\@LN{333}{11}
\@LN{334}{11}
\@LN{335}{11}
\@LN{336}{11}
\@LN{337}{11}
\@LN{338}{11}
\@LN{339}{11}
\@LN{340}{11}
\@LN{341}{11}
\@LN{342}{11}
\@LN{343}{11}
\@LN{344}{11}
\@LN{345}{11}
\@LN{346}{11}
\@LN{347}{11}
\@LN{348}{11}
\@LN{349}{11}
\@LN{350}{11}
\@LN{351}{11}
\@LN{352}{11}
\@LN{353}{12}
\@writefile{toc}{\contentsline {section}{Figures}{13}{section*.3}}
\@writefile{lof}{\contentsline {figure}{\numberline {1}{\ignorespaces {\color {blue}{Location map of the study area, the Bhuntar rain gauge and three discharge stations.}}\relax }}{13}{figure.caption.4}}
\providecommand*\caption@xref[2]{\@setref\relax\@undefined{#1}}
\newlabel{fStudy}{{1}{13}{\DIFadd {Location map of the study area, the Bhuntar rain gauge and three discharge stations.}\relax }{figure.caption.4}{}}
\@writefile{lof}{\contentsline {figure}{\numberline {2}{\ignorespaces {\color {blue}{Mean annual precipitation (1981-2007) of the four datasets (from left IMD gridded observations, ERA-interim reanalysis, APHRODITE gridded observations and WRF regional climate model simulation) and terrain height of the study area(right).}}\relax }}{14}{figure.caption.5}}
\newlabel{FigAnnualSpatial}{{2}{14}{\DIFadd {Mean annual precipitation (1981-2007) of the four datasets (from left IMD gridded observations, ERA-interim reanalysis, APHRODITE gridded observations and WRF regional climate model simulation) and terrain height of the study area(right).}\relax }{figure.caption.5}{}}
\@writefile{lof}{\contentsline {figure}{\numberline {3}{\ignorespaces {\color {blue}{Density curves of mean annual precipitation values in all grid points.}}\relax }}{14}{figure.caption.6}}
\newlabel{annual_Spatial_hist}{{3}{14}{\DIFadd {Density curves of mean annual precipitation values in all grid points.}\relax }{figure.caption.6}{}}
\@writefile{lof}{\contentsline {figure}{\numberline {4}{\ignorespaces {\color {blue}{Precipitation (mm/month) for July-August (upper) and November-December (lower) and in three selected longitude bands from west to east (left to right) plotted against latitude. The longitude value of each band is indicated above the figures. The corresponding terrain height (m) in black is displays at the right axis.}}\relax }}{15}{figure.caption.7}}
\newlabel{SmallBox}{{4}{15}{\DIFadd {Precipitation (mm/month) for July-August (upper) and November-December (lower) and in three selected longitude bands from west to east (left to right) plotted against latitude. The longitude value of each band is indicated above the figures. The corresponding terrain height (m) in black is displays at the right axis.}\relax }{figure.caption.7}{}}
\@writefile{lof}{\contentsline {figure}{\numberline {5}{\ignorespaces Seasonal contributions (in \%) to annual precipitation. From left to right spring (MAM), summer (JJA), autumn (SON) and winter (DJF). From bottom to top WRF regional climate model, APHRODITE gridded observations, ERA-interim reanalysis and IMD gridded observations.\relax }}{16}{figure.caption.8}}
\newlabel{SeasonSpatial}{{5}{16}{Seasonal contributions (in \%) to annual precipitation. From left to right spring (MAM), summer (JJA), autumn (SON) and winter (DJF). From bottom to top WRF regional climate model, APHRODITE gridded observations, ERA-interim reanalysis and IMD gridded observations.\relax }{figure.caption.8}{}}
\@writefile{lof}{\contentsline {figure}{\numberline {6}{\ignorespaces Monthly precipitation (left) and the trend during 1981-2007 (right).\relax }}{17}{figure.caption.9}}
\newlabel{MonPrec}{{6}{17}{Monthly precipitation (left) and the trend during 1981-2007 (right).\relax }{figure.caption.9}{}}
\@writefile{lof}{\contentsline {figure}{\numberline {7}{\ignorespaces Trend (mm/month/year) of summer precipitation.\relax }}{17}{figure.caption.10}}
\newlabel{SumPrecTrend}{{7}{17}{Trend (mm/month/year) of summer precipitation.\relax }{figure.caption.10}{}}
\@writefile{lof}{\contentsline {figure}{\numberline {8}{\ignorespaces {\color {blue}{Density curves of trends (mm/month/year) of summer precipitation in all grid points.}}\relax }}{18}{figure.caption.11}}
\newlabel{SumPrecTrend_hist}{{8}{18}{\DIFadd {Density curves of trends (mm/month/year) of summer precipitation in all grid points.}\relax }{figure.caption.11}{}}
\@writefile{lof}{\contentsline {figure}{\numberline {9}{\ignorespaces Trend (mm/month/year) of winter precipitation.\relax }}{18}{figure.caption.12}}
\newlabel{WinPrecTrend}{{9}{18}{Trend (mm/month/year) of winter precipitation.\relax }{figure.caption.12}{}}
\@writefile{lof}{\contentsline {figure}{\numberline {10}{\ignorespaces {\color {blue}{Density curves of trends (mm/month/year) of winter precipitation in all grid points.}}\relax }}{19}{figure.caption.13}}
\newlabel{WinPrecTrend_hist}{{10}{19}{\DIFadd {Density curves of trends (mm/month/year) of winter precipitation in all grid points.}\relax }{figure.caption.13}{}}
\@writefile{lof}{\contentsline {figure}{\numberline {11}{\ignorespaces {\color {blue}{Annual precipitation at the Bhuntar gauge. Data at the nearest point to the Bhuntar gauge are extracted from the gridded datasets}}\relax }}{19}{figure.caption.14}}
\newlabel{FigBhuntarAnnual}{{11}{19}{\DIFadd {Annual precipitation at the Bhuntar gauge. Data at the nearest point to the Bhuntar gauge are extracted from the gridded datasets}\relax }{figure.caption.14}{}}
\@writefile{lof}{\contentsline {figure}{\numberline {12}{\ignorespaces {\color {blue}{Monthly anomaly at the Bhuntar gauge. Data at the nearest point to the Bhuntar gauge are extracted from the gridded datasets.}}\relax }}{20}{figure.caption.15}}
\newlabel{FigBhuntarMonth}{{12}{20}{\DIFadd {Monthly anomaly at the Bhuntar gauge. Data at the nearest point to the Bhuntar gauge are extracted from the gridded datasets.}\relax }{figure.caption.15}{}}
\@writefile{lof}{\contentsline {figure}{\numberline {13}{\ignorespaces Accumulated precipitation and discharge.\relax }}{20}{figure.caption.16}}
\newlabel{acc_prec_disc}{{13}{20}{Accumulated precipitation and discharge.\relax }{figure.caption.16}{}}
\@writefile{lof}{\contentsline {figure}{\numberline {14}{\ignorespaces Mean temperature and its regression lines for the periods of 1981-1985 and 2003-2007 by the WRF simulation.\relax }}{21}{figure.caption.17}}
\newlabel{Tem_HGT}{{14}{21}{Mean temperature and its regression lines for the periods of 1981-1985 and 2003-2007 by the WRF simulation.\relax }{figure.caption.17}{}}
\@LN{354}{21}
\@writefile{toc}{\contentsline {section}{Tables}{22}{section*.18}}
\@writefile{lot}{\contentsline {table}{\numberline {1}{\ignorespaces Summary of weaknesses and strength of four types of gridded precipitation data.\relax }}{22}{table.caption.19}}
\newlabel{TableProCon}{{1}{22}{Summary of weaknesses and strength of four types of gridded precipitation data.\relax }{table.caption.19}{}}
\@writefile{lot}{\contentsline {table}{\numberline {2}{\ignorespaces The main settings of the WRF regional climate model. The complete setting are shown in supplementary file.\relax }}{22}{table.caption.20}}
\newlabel{WRFsetting}{{2}{22}{The main settings of the WRF regional climate model. The complete setting are shown in supplementary file.\relax }{table.caption.20}{}}
\@writefile{lot}{\contentsline {table}{\numberline {3}{\ignorespaces {\color {blue}{P-value of the tailed Kolmogorov\IeC {\textendash }Smirnov test on differences of on annual precipitation (mm/year) among the datasets. The p-value indicates strong evidence against the null hypothesis. It is typically to reject the null hypothesis, which is two datasets are the same here, when p-value is not greater than 0.05.}}\relax }}{23}{table.caption.21}}
\newlabel{TableKS}{{3}{23}{\DIFadd {P-value of the tailed Kolmogorov–Smirnov test on differences of on annual precipitation (mm/year) among the datasets. The p-value indicates strong evidence against the null hypothesis. It is typically to reject the null hypothesis, which is two datasets are the same here, when p-value is not greater than 0.05.}\relax }{table.caption.21}{}}
\@writefile{lot}{\contentsline {table}{\numberline {4}{\ignorespaces Pearson's correlation of annual precipitation series\relax }}{23}{table.caption.22}}
\newlabel{TableCorr}{{4}{23}{Pearson's correlation of annual precipitation series\relax }{table.caption.22}{}}
\@writefile{lot}{\contentsline {table}{\numberline {5}{\ignorespaces {\color {blue}{Statistics of annual maximum daily precipitation (mm/day) at the Bhuntar gauge. Data of the nearest point are extracted from the gridded datasets. Bold and italics indicates the value closest to the data of the Bhuntar gauge. }}\relax }}{23}{table.caption.23}}
\newlabel{TableExBhuntar}{{5}{23}{\DIFadd {Statistics of annual maximum daily precipitation (mm/day) at the Bhuntar gauge. Data of the nearest point are extracted from the gridded datasets. Bold and italics indicates the value closest to the data of the Bhuntar gauge. }\relax }{table.caption.23}{}}
\@LN{355}{23}
\@writefile{toc}{\contentsline {section}{Appendix A: Appendix}{24}{appendix.A}}
\@writefile{lof}{\contentsline {figure}{\numberline {A1}{\ignorespaces {\color {blue}{Precipitation of the gridded datasets and terrain height of the study area resampled to the IMD grid by bilinear interpolation.}}\relax }}{24}{figure.caption.24}}
\newlabel{FigAnnualSpatial_resample}{{A1}{24}{\DIFadd {Precipitation of the gridded datasets and terrain height of the study area resampled to the IMD grid by bilinear interpolation.}\relax }{figure.caption.24}{}}
\@writefile{lof}{\contentsline {figure}{\numberline {A2}{\ignorespaces {\color {blue}{Data missing rate in the National Climatic Data Center in the study areas.}}\relax }}{25}{figure.caption.25}}
\newlabel{Figncdc}{{A2}{25}{\DIFadd {Data missing rate in the National Climatic Data Center in the study areas.}\relax }{figure.caption.25}{}}
\@writefile{lot}{\contentsline {table}{\numberline {A1}{\ignorespaces {\color {blue}{Statistics of the non-parametric Mann-Kendell test of precipitation.}}\relax }}{26}{table.caption.26}}
\newlabel{TableAMK}{{A1}{26}{\DIFadd {Statistics of the non-parametric Mann-Kendell test of precipitation.}\relax }{table.caption.26}{}}
\newlabel{LastPage}{{}{26}{}{}{}}
