# Supplementary material for: Precipitation pattern in the Western Himalayas revealed by four datasets
Source: Copernicus journal article supplement (doi:10.5194/hess-22-5097-2018), 2018-10-04
Supplement: Supplementary file 1 [file hess-22-5097-2018-supplement.zip › template.bbl]

\begin{thebibliography}{31}
\providecommand{\natexlab}[1]{#1}
\providecommand{\url}[1]{{\tt #1}}
\providecommand{\urlprefix}{URL }
\expandafter\ifx\csname urlstyle\endcsname\relax
  \providecommand{\doi}[1]{doi:\discretionary{}{}{}#1}\else
  \providecommand{\doi}{doi:\discretionary{}{}{}\begingroup
  \urlstyle{rm}\Url}\fi

\bibitem[{Azam et~al.(2012)Azam, Wagon, Ramanathan, Vincent, Sharma, Arnaud,
  Linda, Pottakkal, Chevallier, Singh, and Berthier}]{AZAM2012}
Azam, M.~F., Wagon, P., Ramanathan, A., Vincent, C., Sharma, P., Arnaud, Y.,
  Linda, A., Pottakkal, J.~G., Chevallier, P., Singh, V.~B., and Berthier, E.:
  {From balance to imbalance: a shift in the dynamic behaviour of Chhota Shigri
  glacier, western Himalaya, India}, Journal of Glaciology, 58, 315--324, 2012.

\bibitem[{Azam et~al.(2014)Azam, Wagnon, Vincent, Ramanathan, Linda, and
  Singh}]{Azam2014}
Azam, M.~F., Wagnon, P., Vincent, C., Ramanathan, A., Linda, A., and Singh,
  V.~B.: {Reconstruction of the annual mass balance of Chhota Shigri glacier,
  Western Himalaya, India, since 1969}, Annals of Glaciology, 55, 69--80, 2014.

\bibitem[{Bollasina et~al.(2011)Bollasina, Ming, and Ramaswamy}]{Bollasina2011}
Bollasina, M.~A., Ming, Y., and Ramaswamy, V.: {Anthropogenic Aerosols and the
  Weakening of the South Asian Summer Monsoon}, Science, 2011.

\bibitem[{Bookhagen and Burbank(2006)}]{Bookhagen2006}
Bookhagen, B. and Burbank, D.~W.: {Topography, relief, and TRMM-derived
  rainfall variations along the Himalaya}, Geophysical Research Letters, 33,
  L08\,405, 2006.

\bibitem[{Dee et~al.(2011)Dee, Uppala, Simmons, Berrisford, Poli, Kobayashi,
  Andrae, Balmaseda, Balsamo, Bauer, Bechtold, Beljaars, van~de Berg, Bidlot,
  Bormann, Delsol, Dragani, Fuentes, Geer, Haimberger, Healy, Hersbach,
  H{\'{o}}lm, Isaksen, K{\aa}llberg, K{\"{o}}hler, Matricardi, McNally,
  Monge-Sanz, Morcrette, Park, Peubey, de~Rosnay, Tavolato, Th{\'{e}}paut, and
  Vitart}]{Dee2011}
Dee, D.~P., Uppala, S.~M., Simmons, A.~J., Berrisford, P., Poli, P., Kobayashi,
  S., Andrae, U., Balmaseda, M.~A., Balsamo, G., Bauer, P., Bechtold, P.,
  Beljaars, A. C.~M., van~de Berg, L., Bidlot, J., Bormann, N., Delsol, C.,
  Dragani, R., Fuentes, M., Geer, A.~J., Haimberger, L., Healy, S.~B.,
  Hersbach, H., H{\'{o}}lm, E.~V., Isaksen, L., K{\aa}llberg, P., K{\"{o}}hler,
  M., Matricardi, M., McNally, A.~P., Monge-Sanz, B.~M., Morcrette, J.-J.,
  Park, B.-K., Peubey, C., de~Rosnay, P., Tavolato, C., Th{\'{e}}paut, J.-N.,
  and Vitart, F.: {The ERA-Interim reanalysis: configuration and performance of
  the data assimilation system}, Quarterly Journal of the Royal Meteorological
  Society, 137, 553--597, 2011.

\bibitem[{Dimri and Niyogi(2013)}]{Dimri2013a}
Dimri, A.~P. and Niyogi, D.: {Regional climate model application at subgrid
  scale on Indian winter monsoon over the western Himalayas}, International
  Journal of Climatology, 33, 2185--2205, 2013.

\bibitem[{Dimri et~al.(2013)Dimri, Yasunari, Wiltshire, Kumar, Mathison,
  Ridley, and Jacob}]{Dimri2013}
Dimri, A.~P., Yasunari, T., Wiltshire, A., Kumar, P., Mathison, C., Ridley, J.,
  and Jacob, D.: {Application of regional climate models to the Indian winter
  monsoon over the western Himalayas.}, The Science of the total environment,
  468-469 Su, S36--47, 2013.

\bibitem[{Goswami et~al.(2006)Goswami, Venugopal, Sengupta, Madhusoodanan, and
  Xavier}]{Goswami2006}
Goswami, B.~N., Venugopal, V., Sengupta, D., Madhusoodanan, M.~S., and Xavier,
  P.~K.: {Increasing Trend of Extreme Rain Events Over India in a Warming
  Environment}, Science, 2006.

\bibitem[{Hegdahl et~al.(2016)Hegdahl, Tallaksen, Engeland, Burkhart, and
  Xu}]{Hegdahl2016}
Hegdahl, T.~J., Tallaksen, L.~M., Engeland, K., Burkhart, J.~F., and Xu, C.-Y.:
  {Discharge sensitivity to snowmelt parameterization: a case study for Upper
  Beas basin in Himachal Pradesh, India}, 2016.

\bibitem[{Henn et~al.(2015)Henn, Clark, Kavetski, and Lundquist}]{Henn2015}
Henn, B., Clark, M.~P., Kavetski, D., and Lundquist, J.~D.: {Estimating
  mountain basin-mean precipitation from streamflow using Bayesian inference},
  Water Resources Research, 51, 8012--8033, 2015.

\bibitem[{Kamiguchi et~al.(2010)Kamiguchi, Arakawa, Kitoh, Yatagai, Hamada, and
  Yasutomi}]{Kamiguchi2010}
Kamiguchi, K., Arakawa, O., Kitoh, A., Yatagai, A., Hamada, A., and Yasutomi,
  N.: {Development of APHRO{\_}JP, the first Japanese high-resolution daily
  precipitation product for more than 100 years}, Hydrological Research
  Letters, 4, 60--64, 2010.

\bibitem[{Katragkou et~al.(2015)Katragkou, Garc\'{i}a-D\'{i}ez, Vautard,
  Sobolowski, Zanis, Alexandri, Cardoso, Colette, Fernandez, Gobiet, Goergen,
  Karacostas, Knist, Mayer, Soares, Pytharoulis, Tegoulias, Tsikerdekis, and
  Jacob}]{Katragkou2015}
Katragkou, E., Garc\'{i}a-D\'{i}ez, M., Vautard, R., Sobolowski, S., Zanis, P.,
  Alexandri, G., Cardoso, R.~M., Colette, A., Fernandez, J., Gobiet, A.,
  Goergen, K., Karacostas, T., Knist, S., Mayer, S., Soares, P. M.~M.,
  Pytharoulis, I., Tegoulias, I., Tsikerdekis, A., and Jacob, D.: {Regional
  climate hindcast simulations within EURO-CORDEX: evaluation of a WRF
  multi-physics ensemble}, Geoscientific Model Development, 8, 603--618, 2015.

\bibitem[{Kretzschmar et~al.(2016)Kretzschmar, Tych, Chappell, and
  Beven}]{Kretzschmar2016}
Kretzschmar, A., Tych, W., Chappell, N.~A., and Beven, K.~J.: {Reversing
  hydrology: quantifying the temporal aggregation effect of catchment rainfall
  estimation using sub-hourly data}, Hydrology Research, 2016.

\bibitem[{Kumar et~al.(2007)Kumar, Singh, and Singh}]{KUMAR2007}
Kumar, V., Singh, P., and Singh, V.: {Snow and glacier melt contribution in the
  Beas River at Pandoh Dam, Himachal Pradesh, India}, Hydrological Sciences
  Journal, 52, 376--388, 2007.

\bibitem[{Li et~al.(2015{\natexlab{a}})Li, Beldring, Xu, Huss, Melvold, and
  Jain}]{Li2014b}
Li, H., Beldring, S., Xu, C.-Y., Huss, M., Melvold, K., and Jain, S.~K.:
  {Integrating a glacier retreat model into a hydrological model – Case
  studies of three glacierised catchments in Norway and Himalayan region},
  Journal of Hydrology, 527, 656--667, 2015{\natexlab{a}}.

\bibitem[{Li et~al.(2015{\natexlab{b}})Li, Xu, Beldring, Tallaksen, and
  Jain}]{Li2015}
Li, H., Xu, C.-Y., Beldring, S., Tallaksen, L., and Jain, S.~K.: {Water
  Resources under Climate Change of Himalayan Basins}, Water Resources
  Management, 2015{\natexlab{b}}.

\bibitem[{Li et~al.(2016)Li, Gochis, Sobolowski, and
  Mesquita}]{li2016evaluating}
Li, L., Gochis, D.~J., Sobolowski, S., and Mesquita, M. d.~S.: {Evaluating the
  present annual water budget of a Himalayan headwater river basin using a
  high-resolution atmosphere-hydrology model}, in: EGU General Assembly
  Conference Abstracts, vol.~18, 2016.

\bibitem[{Maussion et~al.(2011)Maussion, Scherer, Finkelnburg, Richters, Yang,
  and Yao}]{Maussion2011}
Maussion, F., Scherer, D., Finkelnburg, R., Richters, J., Yang, W., and Yao,
  T.: {WRF simulation of a precipitation event over the Tibetan Plateau, China
  – an assessment using remote sensing and ground observations}, Hydrology
  and Earth System Sciences, 15, 1795--1817, 2011.

\bibitem[{M{\'{e}}n{\'{e}}goz et~al.(2013)M{\'{e}}n{\'{e}}goz, Gall{\'{e}}e,
  and Jacobi}]{Menegoz2013}
M{\'{e}}n{\'{e}}goz, M., Gall{\'{e}}e, H., and Jacobi, H.~W.: {Precipitation
  and snow cover in the Himalaya: from reanalysis to regional climate
  simulations}, Hydrology and Earth System Sciences, 17, 3921--3936, 2013.

\bibitem[{Palazzi et~al.(2013)Palazzi, von Hardenberg, and
  Provenzale}]{Palazzi2013}
Palazzi, E., von Hardenberg, J., and Provenzale, A.: {Precipitation in the
  Hindu-Kush Karakoram Himalaya: Observations and future scenarios}, Journal of
  Geophysical Research: Atmospheres, 118, 85--100, 2013.

\bibitem[{Pechlivanidis and Arheimer(2015)}]{Pechlivanidis2015}
Pechlivanidis, I.~G. and Arheimer, B.: {Large-scale hydrological modelling by
  using modified PUB recommendations: the India-HYPE case}, Hydrology and Earth
  System Sciences, 19, 4559--4579, 2015.

\bibitem[{Purohit and Kau(2016)}]{Purohit2016}
Purohit, M.~K. and Kau, S.: {Rainfall Statistics of India - 2016}, Tech. rep.,
  2016.

\bibitem[{Rajeevan et~al.(2006)Rajeevan, Bhate, Kale, and
  Lal}]{rajeevan2006high}
Rajeevan, M., Bhate, J., Kale, J.~D., and Lal, B.: {High resolution daily
  gridded rainfall data for the Indian region: Analysis of break and active
  monsoon spells}, Current Science, 2006.

\bibitem[{Ren et~al.(2017)Ren, Ren, Sun, Shrestha, You, Zhan, Rajbhandari,
  Zhang, and Wen}]{REN2017148}
Ren, Y.-Y., Ren, G.-Y., Sun, X.-B., Shrestha, A.~B., You, Q.-L., Zhan, Y.-J.,
  Rajbhandari, R., Zhang, P.-F., and Wen, K.-M.: {Observed changes in surface
  air temperature and precipitation in the Hindu Kush Himalayan region over the
  last 100-plus years}, Advances in Climate Change Research, 8, 148--156, 2017.

\bibitem[{Shepard(1968)}]{shepard1968two}
Shepard, D.: {A two-dimensional interpolation function for irregularly-spaced
  data}, in: Proceedings of the 1968 23rd ACM national conference, pp.
  517--524, 1968.

\bibitem[{Srinivas et~al.(2013)Srinivas, Hariprasad, {Bhaskar Rao}, Anjaneyulu,
  Baskaran, and Venkatraman}]{Srinivas2013}
Srinivas, C.~V., Hariprasad, D., {Bhaskar Rao}, D.~V., Anjaneyulu, Y.,
  Baskaran, R., and Venkatraman, B.: {Simulation of the Indian summer monsoon
  regional climate using advanced research WRF model}, International Journal of
  Climatology, 33, 1195--1210, 2013.

\bibitem[{Wiltshire(2014)}]{Wiltshire2014}
Wiltshire, A.~J.: {Climate change implications for the glaciers of the Hindu
  Kush, Karakoram and Himalayan region}, The Cryosphere, 8, 941--958, 2014.

\bibitem[{Xu et~al.(2016)Xu, Xu, Chen, and Chen}]{Xu2016}
Xu, H., Xu, C.-Y., Chen, S., and Chen, H.: {Similarity and difference of global
  reanalysis datasets (WFD and APHRODITE) in driving lumped and distributed
  hydrological models in a humid region of China}, Journal of Hydrology, 542,
  343--356, 2016.

\bibitem[{Yang et~al.(1998)Yang, Goodison, Ishida, and Benson}]{Yang1998}
Yang, D., Goodison, B.~E., Ishida, S., and Benson, C.~S.: {Adjustment of daily
  precipitation data at 10 climate stations in Alaska: Application of World
  Meteorological Organization intercomparison results}, Water Resources
  Research, 34, 241--256, 1998.

\bibitem[{Yatagai et~al.(2012)Yatagai, Kamiguchi, Arakawa, Hamada, Yasutomi,
  and Kitoh}]{Yatagai2012}
Yatagai, A., Kamiguchi, K., Arakawa, O., Hamada, A., Yasutomi, N., and Kitoh,
  A.: {APHRODITE: Constructing a Long-Term Daily Gridded Precipitation Dataset
  for Asia Based on a Dense Network of Rain Gauges}, Bulletin of the American
  Meteorological Society, 93, 1401--1415, 2012.

\bibitem[{Yin et~al.(2008)Yin, Zhang, Liu, Colella, and Chen}]{Yin2008}
Yin, Z.-Y., Zhang, X., Liu, X., Colella, M., and Chen, X.: {An Assessment of
  the Biases of Satellite Rainfall Estimates over the Tibetan Plateau and
  Correction Methods Based on Topographic Analysis}, Journal of
  Hydrometeorology, 9, 301--326, 2008.

\end{thebibliography}
