# Supplementary material for: Precipitation pattern in the Western Himalayas revealed by four datasets
Source: Copernicus journal article supplement (doi:10.5194/hess-22-5097-2018), 2018-10-04
Supplement: Supplementary file 1 [file hess-22-5097-2018-supplement.zip › template.blg]

This is BibTeX, Version 0.99d (TeX Live 2016/Debian)
Capacity: max_strings=100000, hash_size=100000, hash_prime=85009
The top-level auxiliary file: template.aux
The style file: copernicus.bst
url is an unknown function---line 670 of file copernicus.bst
url is an unknown function---line 672 of file copernicus.bst
note is an unknown function---line 674 of file copernicus.bst
note is an unknown function---line 676 of file copernicus.bst
note is an unknown function---line 686 of file copernicus.bst
Database file #1: library.bib
Repeated entry---line 6657 of file library.bib
 : @article{Azam2014
 :                  ,
I'm skipping whatever remains of this entry
Repeated entry---line 6685 of file library.bib
 : @article{AZAM2012
 :                  ,
I'm skipping whatever remains of this entry
Repeated entry---line 6985 of file library.bib
 : @article{rajeevan2006high
 :                          ,
I'm skipping whatever remains of this entry
Repeated entry---line 7057 of file library.bib
 : @article{Dee2011
 :                 ,
I'm skipping whatever remains of this entry
Repeated entry---line 7098 of file library.bib
 : @article{Palazzi2013
 :                     ,
I'm skipping whatever remains of this entry
Repeated entry---line 7144 of file library.bib
 : @article{Srinivas2013
 :                      ,
I'm skipping whatever remains of this entry
Repeated entry---line 7320 of file library.bib
 : @article{Li2014b
 :                 ,
I'm skipping whatever remains of this entry
Repeated entry---line 7709 of file library.bib
 : @article{Li2014b
 :                 ,
I'm skipping whatever remains of this entry
Repeated entry---line 7811 of file library.bib
 : @article{rajeevan2006high
 :                          ,
I'm skipping whatever remains of this entry
You can't pop an empty literal stack for entry AZAM2012
while executing---line 1671 of file copernicus.bst
You can't pop an empty literal stack for entry AZAM2012
while executing---line 1671 of file copernicus.bst
You can't pop an empty literal stack for entry AZAM2012
while executing---line 1671 of file copernicus.bst
You can't pop an empty literal stack for entry AZAM2012
while executing---line 1671 of file copernicus.bst
You can't pop an empty literal stack for entry AZAM2012
while executing---line 1671 of file copernicus.bst
You can't pop an empty literal stack for entry Azam2014
while executing---line 1671 of file copernicus.bst
You can't pop an empty literal stack for entry Azam2014
while executing---line 1671 of file copernicus.bst
You can't pop an empty literal stack for entry Azam2014
while executing---line 1671 of file copernicus.bst
You can't pop an empty literal stack for entry Azam2014
while executing---line 1671 of file copernicus.bst
You can't pop an empty literal stack for entry Azam2014
while executing---line 1671 of file copernicus.bst
You can't pop an empty literal stack for entry Bollasina2011
while executing---line 1671 of file copernicus.bst
You can't pop an empty literal stack for entry Bollasina2011
while executing---line 1671 of file copernicus.bst
You can't pop an empty literal stack for entry Bollasina2011
while executing---line 1671 of file copernicus.bst
You can't pop an empty literal stack for entry Bollasina2011
while executing---line 1671 of file copernicus.bst
You can't pop an empty literal stack for entry Bollasina2011
while executing---line 1671 of file copernicus.bst
You can't pop an empty literal stack for entry Bookhagen2006
while executing---line 1671 of file copernicus.bst
You can't pop an empty literal stack for entry Bookhagen2006
while executing---line 1671 of file copernicus.bst
You can't pop an empty literal stack for entry Bookhagen2006
while executing---line 1671 of file copernicus.bst
You can't pop an empty literal stack for entry Bookhagen2006
while executing---line 1671 of file copernicus.bst
You can't pop an empty literal stack for entry Bookhagen2006
while executing---line 1671 of file copernicus.bst
You can't pop an empty literal stack for entry Dee2011
while executing---line 1671 of file copernicus.bst
You can't pop an empty literal stack for entry Dee2011
while executing---line 1671 of file copernicus.bst
You can't pop an empty literal stack for entry Dee2011
while executing---line 1671 of file copernicus.bst
You can't pop an empty literal stack for entry Dee2011
while executing---line 1671 of file copernicus.bst
You can't pop an empty literal stack for entry Dee2011
while executing---line 1671 of file copernicus.bst
You can't pop an empty literal stack for entry Dimri2013a
while executing---line 1671 of file copernicus.bst
You can't pop an empty literal stack for entry Dimri2013a
while executing---line 1671 of file copernicus.bst
You can't pop an empty literal stack for entry Dimri2013a
while executing---line 1671 of file copernicus.bst
You can't pop an empty literal stack for entry Dimri2013a
while executing---line 1671 of file copernicus.bst
You can't pop an empty literal stack for entry Dimri2013a
while executing---line 1671 of file copernicus.bst
You can't pop an empty literal stack for entry Dimri2013
while executing---line 1671 of file copernicus.bst
You can't pop an empty literal stack for entry Dimri2013
while executing---line 1671 of file copernicus.bst
You can't pop an empty literal stack for entry Dimri2013
while executing---line 1671 of file copernicus.bst
You can't pop an empty literal stack for entry Dimri2013
while executing---line 1671 of file copernicus.bst
You can't pop an empty literal stack for entry Dimri2013
while executing---line 1671 of file copernicus.bst
You can't pop an empty literal stack for entry Goswami2006
while executing---line 1671 of file copernicus.bst
You can't pop an empty literal stack for entry Goswami2006
while executing---line 1671 of file copernicus.bst
You can't pop an empty literal stack for entry Goswami2006
while executing---line 1671 of file copernicus.bst
You can't pop an empty literal stack for entry Goswami2006
while executing---line 1671 of file copernicus.bst
You can't pop an empty literal stack for entry Goswami2006
while executing---line 1671 of file copernicus.bst
You can't pop an empty literal stack for entry Hegdahl2016
while executing---line 1671 of file copernicus.bst
You can't pop an empty literal stack for entry Hegdahl2016
while executing---line 1671 of file copernicus.bst
You can't pop an empty literal stack for entry Hegdahl2016
while executing---line 1671 of file copernicus.bst
You can't pop an empty literal stack for entry Hegdahl2016
while executing---line 1671 of file copernicus.bst
You can't pop an empty literal stack for entry Hegdahl2016
while executing---line 1671 of file copernicus.bst
You can't pop an empty literal stack for entry Henn2015
while executing---line 1671 of file copernicus.bst
You can't pop an empty literal stack for entry Henn2015
while executing---line 1671 of file copernicus.bst
You can't pop an empty literal stack for entry Henn2015
while executing---line 1671 of file copernicus.bst
You can't pop an empty literal stack for entry Henn2015
while executing---line 1671 of file copernicus.bst
You can't pop an empty literal stack for entry Henn2015
while executing---line 1671 of file copernicus.bst
You can't pop an empty literal stack for entry Kamiguchi2010
while executing---line 1671 of file copernicus.bst
You can't pop an empty literal stack for entry Kamiguchi2010
while executing---line 1671 of file copernicus.bst
You can't pop an empty literal stack for entry Kamiguchi2010
while executing---line 1671 of file copernicus.bst
You can't pop an empty literal stack for entry Kamiguchi2010
while executing---line 1671 of file copernicus.bst
You can't pop an empty literal stack for entry Kamiguchi2010
while executing---line 1671 of file copernicus.bst
You can't pop an empty literal stack for entry Katragkou2015
while executing---line 1671 of file copernicus.bst
You can't pop an empty literal stack for entry Katragkou2015
while executing---line 1671 of file copernicus.bst
You can't pop an empty literal stack for entry Katragkou2015
while executing---line 1671 of file copernicus.bst
You can't pop an empty literal stack for entry Katragkou2015
while executing---line 1671 of file copernicus.bst
You can't pop an empty literal stack for entry Katragkou2015
while executing---line 1671 of file copernicus.bst
You can't pop an empty literal stack for entry Kretzschmar2016
while executing---line 1671 of file copernicus.bst
You can't pop an empty literal stack for entry Kretzschmar2016
while executing---line 1671 of file copernicus.bst
You can't pop an empty literal stack for entry Kretzschmar2016
while executing---line 1671 of file copernicus.bst
You can't pop an empty literal stack for entry Kretzschmar2016
while executing---line 1671 of file copernicus.bst
You can't pop an empty literal stack for entry Kretzschmar2016
while executing---line 1671 of file copernicus.bst
You can't pop an empty literal stack for entry KUMAR2007
while executing---line 1671 of file copernicus.bst
You can't pop an empty literal stack for entry KUMAR2007
while executing---line 1671 of file copernicus.bst
You can't pop an empty literal stack for entry KUMAR2007
while executing---line 1671 of file copernicus.bst
You can't pop an empty literal stack for entry KUMAR2007
while executing---line 1671 of file copernicus.bst
You can't pop an empty literal stack for entry KUMAR2007
while executing---line 1671 of file copernicus.bst
You can't pop an empty literal stack for entry Li2014b
while executing---line 1671 of file copernicus.bst
You can't pop an empty literal stack for entry Li2014b
while executing---line 1671 of file copernicus.bst
You can't pop an empty literal stack for entry Li2014b
while executing---line 1671 of file copernicus.bst
You can't pop an empty literal stack for entry Li2014b
while executing---line 1671 of file copernicus.bst
You can't pop an empty literal stack for entry Li2014b
while executing---line 1671 of file copernicus.bst
You can't pop an empty literal stack for entry Li2015
while executing---line 1671 of file copernicus.bst
You can't pop an empty literal stack for entry Li2015
while executing---line 1671 of file copernicus.bst
You can't pop an empty literal stack for entry Li2015
while executing---line 1671 of file copernicus.bst
You can't pop an empty literal stack for entry Li2015
while executing---line 1671 of file copernicus.bst
You can't pop an empty literal stack for entry Li2015
while executing---line 1671 of file copernicus.bst
You can't pop an empty literal stack for entry li2016evaluating
while executing---line 1671 of file copernicus.bst
You can't pop an empty literal stack for entry li2016evaluating
while executing---line 1671 of file copernicus.bst
You can't pop an empty literal stack for entry li2016evaluating
while executing---line 1671 of file copernicus.bst
You can't pop an empty literal stack for entry li2016evaluating
while executing---line 1671 of file copernicus.bst
You can't pop an empty literal stack for entry li2016evaluating
while executing---line 1671 of file copernicus.bst
You can't pop an empty literal stack for entry Maussion2011
while executing---line 1671 of file copernicus.bst
You can't pop an empty literal stack for entry Maussion2011
while executing---line 1671 of file copernicus.bst
You can't pop an empty literal stack for entry Maussion2011
while executing---line 1671 of file copernicus.bst
You can't pop an empty literal stack for entry Maussion2011
while executing---line 1671 of file copernicus.bst
You can't pop an empty literal stack for entry Maussion2011
while executing---line 1671 of file copernicus.bst
You can't pop an empty literal stack for entry Menegoz2013
while executing---line 1671 of file copernicus.bst
You can't pop an empty literal stack for entry Menegoz2013
while executing---line 1671 of file copernicus.bst
You can't pop an empty literal stack for entry Menegoz2013
while executing---line 1671 of file copernicus.bst
You can't pop an empty literal stack for entry Menegoz2013
while executing---line 1671 of file copernicus.bst
You can't pop an empty literal stack for entry Menegoz2013
while executing---line 1671 of file copernicus.bst
You can't pop an empty literal stack for entry Palazzi2013
while executing---line 1671 of file copernicus.bst
You can't pop an empty literal stack for entry Palazzi2013
while executing---line 1671 of file copernicus.bst
You can't pop an empty literal stack for entry Palazzi2013
while executing---line 1671 of file copernicus.bst
You can't pop an empty literal stack for entry Palazzi2013
while executing---line 1671 of file copernicus.bst
You can't pop an empty literal stack for entry Palazzi2013
while executing---line 1671 of file copernicus.bst
You can't pop an empty literal stack for entry Pechlivanidis2015
while executing---line 1671 of file copernicus.bst
You can't pop an empty literal stack for entry Pechlivanidis2015
while executing---line 1671 of file copernicus.bst
You can't pop an empty literal stack for entry Pechlivanidis2015
while executing---line 1671 of file copernicus.bst
You can't pop an empty literal stack for entry Pechlivanidis2015
while executing---line 1671 of file copernicus.bst
You can't pop an empty literal stack for entry Pechlivanidis2015
while executing---line 1671 of file copernicus.bst
You can't pop an empty literal stack for entry Purohit2016
while executing---line 1671 of file copernicus.bst
You can't pop an empty literal stack for entry Purohit2016
while executing---line 1671 of file copernicus.bst
You can't pop an empty literal stack for entry Purohit2016
while executing---line 1671 of file copernicus.bst
You can't pop an empty literal stack for entry Purohit2016
while executing---line 1671 of file copernicus.bst
You can't pop an empty literal stack for entry Purohit2016
while executing---line 1671 of file copernicus.bst
You can't pop an empty literal stack for entry rajeevan2006high
while executing---line 1671 of file copernicus.bst
You can't pop an empty literal stack for entry rajeevan2006high
while executing---line 1671 of file copernicus.bst
You can't pop an empty literal stack for entry rajeevan2006high
while executing---line 1671 of file copernicus.bst
You can't pop an empty literal stack for entry rajeevan2006high
while executing---line 1671 of file copernicus.bst
You can't pop an empty literal stack for entry rajeevan2006high
while executing---line 1671 of file copernicus.bst
You can't pop an empty literal stack for entry REN2017148
while executing---line 1671 of file copernicus.bst
You can't pop an empty literal stack for entry REN2017148
while executing---line 1671 of file copernicus.bst
You can't pop an empty literal stack for entry REN2017148
while executing---line 1671 of file copernicus.bst
You can't pop an empty literal stack for entry REN2017148
while executing---line 1671 of file copernicus.bst
You can't pop an empty literal stack for entry REN2017148
while executing---line 1671 of file copernicus.bst
You can't pop an empty literal stack for entry shepard1968two
while executing---line 1671 of file copernicus.bst
You can't pop an empty literal stack for entry shepard1968two
while executing---line 1671 of file copernicus.bst
You can't pop an empty literal stack for entry shepard1968two
while executing---line 1671 of file copernicus.bst
You can't pop an empty literal stack for entry shepard1968two
while executing---line 1671 of file copernicus.bst
You can't pop an empty literal stack for entry shepard1968two
while executing---line 1671 of file copernicus.bst
You can't pop an empty literal stack for entry Srinivas2013
while executing---line 1671 of file copernicus.bst
You can't pop an empty literal stack for entry Srinivas2013
while executing---line 1671 of file copernicus.bst
You can't pop an empty literal stack for entry Srinivas2013
while executing---line 1671 of file copernicus.bst
You can't pop an empty literal stack for entry Srinivas2013
while executing---line 1671 of file copernicus.bst
You can't pop an empty literal stack for entry Srinivas2013
while executing---line 1671 of file copernicus.bst
You can't pop an empty literal stack for entry Wiltshire2014
while executing---line 1671 of file copernicus.bst
You can't pop an empty literal stack for entry Wiltshire2014
while executing---line 1671 of file copernicus.bst
You can't pop an empty literal stack for entry Wiltshire2014
while executing---line 1671 of file copernicus.bst
You can't pop an empty literal stack for entry Wiltshire2014
while executing---line 1671 of file copernicus.bst
You can't pop an empty literal stack for entry Wiltshire2014
while executing---line 1671 of file copernicus.bst
You can't pop an empty literal stack for entry Xu2016
while executing---line 1671 of file copernicus.bst
You can't pop an empty literal stack for entry Xu2016
while executing---line 1671 of file copernicus.bst
You can't pop an empty literal stack for entry Xu2016
while executing---line 1671 of file copernicus.bst
You can't pop an empty literal stack for entry Xu2016
while executing---line 1671 of file copernicus.bst
You can't pop an empty literal stack for entry Xu2016
while executing---line 1671 of file copernicus.bst
You can't pop an empty literal stack for entry Yang1998
while executing---line 1671 of file copernicus.bst
You can't pop an empty literal stack for entry Yang1998
while executing---line 1671 of file copernicus.bst
You can't pop an empty literal stack for entry Yang1998
while executing---line 1671 of file copernicus.bst
You can't pop an empty literal stack for entry Yang1998
while executing---line 1671 of file copernicus.bst
You can't pop an empty literal stack for entry Yang1998
while executing---line 1671 of file copernicus.bst
You can't pop an empty literal stack for entry Yatagai2012
while executing---line 1671 of file copernicus.bst
You can't pop an empty literal stack for entry Yatagai2012
while executing---line 1671 of file copernicus.bst
You can't pop an empty literal stack for entry Yatagai2012
while executing---line 1671 of file copernicus.bst
You can't pop an empty literal stack for entry Yatagai2012
while executing---line 1671 of file copernicus.bst
You can't pop an empty literal stack for entry Yatagai2012
while executing---line 1671 of file copernicus.bst
You can't pop an empty literal stack for entry Yin2008
while executing---line 1671 of file copernicus.bst
You can't pop an empty literal stack for entry Yin2008
while executing---line 1671 of file copernicus.bst
You can't pop an empty literal stack for entry Yin2008
while executing---line 1671 of file copernicus.bst
You can't pop an empty literal stack for entry Yin2008
while executing---line 1671 of file copernicus.bst
You can't pop an empty literal stack for entry Yin2008
while executing---line 1671 of file copernicus.bst
You've used 31 entries,
            2806 wiz_defined-function locations,
            1231 strings with 17311 characters,
and the built_in function-call counts, 38794 in all, are:
= -- 4349
> -- 1745
< -- 9
+ -- 754
- -- 552
* -- 2583
:= -- 3835
add.period$ -- 31
call.type$ -- 31
change.case$ -- 278
chr.to.int$ -- 30
cite$ -- 93
duplicate$ -- 3793
empty$ -- 1815
format.name$ -- 649
if$ -- 7674
int.to.chr$ -- 2
int.to.str$ -- 1
missing$ -- 431
newline$ -- 102
num.names$ -- 124
pop$ -- 1583
preamble$ -- 1
purify$ -- 246
quote$ -- 0
skip$ -- 2242
stack$ -- 0
substring$ -- 1638
swap$ -- 3343
text.length$ -- 3
text.prefix$ -- 0
top$ -- 0
type$ -- 279
warning$ -- 0
while$ -- 175
width$ -- 0
write$ -- 403
(There were 169 error messages)
