# Supplementary material for: Precipitation pattern in the Western Himalayas revealed by four datasets
Source: Copernicus journal article supplement (doi:10.5194/hess-22-5097-2018), 2018-10-04
Supplement: Supplementary file 1 [file hess-22-5097-2018-supplement.zip › template.fdb_latexmk]

# Fdb version 3
["bibtex template"] 1534250860 "template.aux" "template.bbl" "template" 1534250876
  "./copernicus.bst" 1534242062 37264 549e7399ccc00cc3b9e2b2ea99e9e19e ""
  "library.bib" 1534242062 749339 ff11dca04d11c6787a2dd8a28733e140 ""
  "template.aux" 1534250876 21952 f3ffc5a8ec41c40854d5c62f311a5fef ""
  "template.bcf" 0 -1 0 ""
  (generated)
  "template.blg"
  "template.bbl"
["pdflatex"] 1534250861 "template.tex" "template.pdf" "template" 1534250876
  "/etc/texmf/web2c/texmf.cnf" 1515831263 475 c0e671620eb5563b2130f56340a5fde8 ""
  "/usr/share/texlive/texmf-dist/fonts/enc/dvips/base/8r.enc" 1165713224 4850 80dc9bab7f31fb78a000ccfed0e27cab ""
  "/usr/share/texlive/texmf-dist/fonts/map/fontname/texfonts.map" 1272929888 3287 e6b82fe08f5336d4d5ebc73fb1152e87 ""
  "/usr/share/texlive/texmf-dist/fonts/tfm/adobe/helvetic/phvr8r.tfm" 1136768653 4712 9ef4d7d106579d4b136e1529e1a4533c ""
  "/usr/share/texlive/texmf-dist/fonts/tfm/adobe/helvetic/phvr8t.tfm" 1136768653 7040 b2bd27e2bfe6f6948cbc3239cae7444f ""
  "/usr/share/texlive/texmf-dist/fonts/tfm/adobe/symbol/psyr.tfm" 1136768653 1408 5937f58aa508ea2cea4901c07d10f5fe ""
  "/usr/share/texlive/texmf-dist/fonts/tfm/adobe/times/ptmb8r.tfm" 1136768653 4524 6bce29db5bc272ba5f332261583fee9c ""
  "/usr/share/texlive/texmf-dist/fonts/tfm/adobe/times/ptmb8t.tfm" 1136768653 6880 f19b8995b61c334d78fc734065f6b4d4 ""
  "/usr/share/texlive/texmf-dist/fonts/tfm/adobe/times/ptmbi8r.tfm" 1136768653 4480 10409ed8bab5aea9ec9a78028b763919 ""
  "/usr/share/texlive/texmf-dist/fonts/tfm/adobe/times/ptmbi8t.tfm" 1136768653 6784 37b32cc10800b5afa030d935c393695a ""
  "/usr/share/texlive/texmf-dist/fonts/tfm/adobe/times/ptmr8c.tfm" 1136768653 1352 fa28a7e6d323c65ce7d13d5342ff6be2 ""
  "/usr/share/texlive/texmf-dist/fonts/tfm/adobe/times/ptmr8r.tfm" 1136768653 4408 25b74d011a4c66b7f212c0cc3c90061b ""
  "/usr/share/texlive/texmf-dist/fonts/tfm/adobe/times/ptmr8t.tfm" 1136768653 6672 e3ab9e37e925f3045c9005e6d1473d56 ""
  "/usr/share/texlive/texmf-dist/fonts/tfm/adobe/times/ptmri8r.tfm" 1136768653 4640 532ca3305aad10cc01d769f3f91f1029 ""
  "/usr/share/texlive/texmf-dist/fonts/tfm/adobe/times/ptmri8t.tfm" 1136768653 6944 94c55ad86e6ea2826f78ba2240d50df9 ""
  "/usr/share/texlive/texmf-dist/fonts/tfm/adobe/zapfding/pzdr.tfm" 1136768653 1528 f853c4d1b4e0550255e02831fdc8496f ""
  "/usr/share/texlive/texmf-dist/fonts/tfm/jknappen/ec/ecrm1000.tfm" 1136768653 3584 adb004a0c8e7c46ee66cad73671f37b4 ""
  "/usr/share/texlive/texmf-dist/fonts/tfm/public/amsfonts/cmextra/cmex7.tfm" 1246382020 1004 54797486969f23fa377b128694d548df ""
  "/usr/share/texlive/texmf-dist/fonts/tfm/public/amsfonts/cmextra/cmex8.tfm" 1246382020 988 bdf658c3bfc2d96d3c8b02cfc1c94c20 ""
  "/usr/share/texlive/texmf-dist/fonts/tfm/public/amsfonts/cmextra/cmex9.tfm" 1246382020 996 a18840b13b499c08ac2de96a99eda4bc ""
  "/usr/share/texlive/texmf-dist/fonts/tfm/public/amsfonts/symbols/msam10.tfm" 1246382020 916 f87d7c45f9c908e672703b83b72241a3 ""
  "/usr/share/texlive/texmf-dist/fonts/tfm/public/amsfonts/symbols/msam5.tfm" 1246382020 924 9904cf1d39e9767e7a3622f2a125a565 ""
  "/usr/share/texlive/texmf-dist/fonts/tfm/public/amsfonts/symbols/msam7.tfm" 1246382020 928 2dc8d444221b7a635bb58038579b861a ""
  "/usr/share/texlive/texmf-dist/fonts/tfm/public/amsfonts/symbols/msbm10.tfm" 1246382020 908 2921f8a10601f252058503cc6570e581 ""
  "/usr/share/texlive/texmf-dist/fonts/tfm/public/amsfonts/symbols/msbm5.tfm" 1246382020 940 75ac932a52f80982a9f8ea75d03a34cf ""
  "/usr/share/texlive/texmf-dist/fonts/tfm/public/amsfonts/symbols/msbm7.tfm" 1246382020 940 228d6584342e91276bf566bcf9716b83 ""
  "/usr/share/texlive/texmf-dist/fonts/tfm/public/cm/cmex10.tfm" 1136768653 992 662f679a0b3d2d53c1b94050fdaa3f50 ""
  "/usr/share/texlive/texmf-dist/fonts/tfm/public/cm/cmmi12.tfm" 1136768653 1524 4414a8315f39513458b80dfc63bff03a ""
  "/usr/share/texlive/texmf-dist/fonts/tfm/public/cm/cmmi6.tfm" 1136768653 1512 f21f83efb36853c0b70002322c1ab3ad ""
  "/usr/share/texlive/texmf-dist/fonts/tfm/public/cm/cmmi8.tfm" 1136768653 1520 eccf95517727cb11801f4f1aee3a21b4 ""
  "/usr/share/texlive/texmf-dist/fonts/tfm/public/cm/cmmi9.tfm" 1136768653 1524 d89e2d087a9828407a196f428428ef4a ""
  "/usr/share/texlive/texmf-dist/fonts/tfm/public/cm/cmr12.tfm" 1136768653 1288 655e228510b4c2a1abe905c368440826 ""
  "/usr/share/texlive/texmf-dist/fonts/tfm/public/cm/cmr6.tfm" 1136768653 1300 b62933e007d01cfd073f79b963c01526 ""
  "/usr/share/texlive/texmf-dist/fonts/tfm/public/cm/cmr8.tfm" 1136768653 1292 21c1c5bfeaebccffdb478fd231a0997d ""
  "/usr/share/texlive/texmf-dist/fonts/tfm/public/cm/cmr9.tfm" 1136768653 1292 6b21b9c2c7bebb38aa2273f7ca0fb3af ""
  "/usr/share/texlive/texmf-dist/fonts/tfm/public/cm/cmsy10.tfm" 1136768653 1124 6c73e740cf17375f03eec0ee63599741 ""
  "/usr/share/texlive/texmf-dist/fonts/tfm/public/cm/cmsy6.tfm" 1136768653 1116 933a60c408fc0a863a92debe84b2d294 ""
  "/usr/share/texlive/texmf-dist/fonts/tfm/public/cm/cmsy8.tfm" 1136768653 1120 8b7d695260f3cff42e636090a8002094 ""
  "/usr/share/texlive/texmf-dist/fonts/tfm/public/cm/cmsy9.tfm" 1136768653 1116 25a7bf822c58caf309a702ef79f4afbb ""
  "/usr/share/texlive/texmf-dist/fonts/tfm/public/latex-fonts/lasy6.tfm" 1136768653 520 4889cce2180234b97cad636b6039c722 ""
  "/usr/share/texlive/texmf-dist/fonts/type1/public/amsfonts/cm/cmsy10.pfb" 1248133631 32569 5e5ddc8df908dea60932f3c484a54c0d ""
  "/usr/share/texlive/texmf-dist/fonts/type1/public/amsfonts/cm/cmsy6.pfb" 1248133631 32587 1788b0c1c5b39540c96f5e42ccd6dae8 ""
  "/usr/share/texlive/texmf-dist/fonts/type1/public/amsfonts/cm/cmsy7.pfb" 1248133631 32716 08e384dc442464e7285e891af9f45947 ""
  "/usr/share/texlive/texmf-dist/fonts/type1/public/amsfonts/cm/cmsy9.pfb" 1248133631 32442 c975af247b6702f7ca0c299af3616b80 ""
  "/usr/share/texlive/texmf-dist/fonts/type1/public/amsfonts/latxfont/line10.pfb" 1248133631 11493 4f5ed183a47d3197cf8cd322325db6de ""
  "/usr/share/texlive/texmf-dist/fonts/type1/urw/helvetic/uhvr8a.pfb" 1136849748 44648 23115b2a545ebfe2c526c3ca99db8b95 ""
  "/usr/share/texlive/texmf-dist/fonts/type1/urw/times/utmb8a.pfb" 1136849748 44729 811d6c62865936705a31c797a1d5dada ""
  "/usr/share/texlive/texmf-dist/fonts/type1/urw/times/utmbi8a.pfb" 1136849748 44656 0cbca70e0534538582128f6b54593cca ""
  "/usr/share/texlive/texmf-dist/fonts/type1/urw/times/utmr8a.pfb" 1136849748 46026 6dab18b61c907687b520c72847215a68 ""
  "/usr/share/texlive/texmf-dist/fonts/type1/urw/times/utmri8a.pfb" 1136849748 45458 a3faba884469519614ca56ba5f6b1de1 ""
  "/usr/share/texlive/texmf-dist/fonts/vf/adobe/helvetic/phvr8t.vf" 1136768653 2344 44ff28c9ef2fc97180cd884f900fee71 ""
  "/usr/share/texlive/texmf-dist/fonts/vf/adobe/times/ptmb8t.vf" 1136768653 2340 df9c920cc5688ebbf16a93f45ce7bdd3 ""
  "/usr/share/texlive/texmf-dist/fonts/vf/adobe/times/ptmbi8t.vf" 1136768653 2324 51908dae6e03953a90119973962f0e4d ""
  "/usr/share/texlive/texmf-dist/fonts/vf/adobe/times/ptmr8c.vf" 1136768653 3556 8a9a6dcbcd146ef985683f677f4758a6 ""
  "/usr/share/texlive/texmf-dist/fonts/vf/adobe/times/ptmr8t.vf" 1136768653 2348 91706c542228501c410c266421fbe30c ""
  "/usr/share/texlive/texmf-dist/fonts/vf/adobe/times/ptmri8t.vf" 1136768653 2328 6cd7df782b09b29cfc4d93e55b6b9a59 ""
  "/usr/share/texlive/texmf-dist/tex/context/base/mkii/supp-pdf.mkii" 1461363279 71627 94eb9990bed73c364d7f53f960cc8c5b ""
  "/usr/share/texlive/texmf-dist/tex/generic/babel-english/english.ldf" 1367878877 6963 2e0cb3d93aa64508bdb0db58ae900d97 ""
  "/usr/share/texlive/texmf-dist/tex/generic/babel/babel.def" 1461448269 50112 8190990703f12b57db0dfe9b839e1e24 ""
  "/usr/share/texlive/texmf-dist/tex/generic/babel/babel.sty" 1461448269 13499 2379954ebbdf3db89eccb32499d2da36 ""
  "/usr/share/texlive/texmf-dist/tex/generic/ifxetex/ifxetex.sty" 1284331290 1458 43ab4710dc82f3edeabecd0d099626b2 ""
  "/usr/share/texlive/texmf-dist/tex/generic/oberdiek/gettitlestring.sty" 1463608860 8237 3b62ef1f7e2c23a328c814b3893bc11f ""
  "/usr/share/texlive/texmf-dist/tex/generic/oberdiek/hobsub-generic.sty" 1465595255 185033 59b2c30c35b665d3e466ed723aa88d38 ""
  "/usr/share/texlive/texmf-dist/tex/generic/oberdiek/hobsub-hyperref.sty" 1465595255 70864 bcd5b216757bd619ae692a151d90085d ""
  "/usr/share/texlive/texmf-dist/tex/generic/oberdiek/infwarerr.sty" 1463608860 8253 473e0e41f9adadb1977e8631b8f72ea6 ""
  "/usr/share/texlive/texmf-dist/tex/generic/oberdiek/ltxcmds.sty" 1463608860 18425 5b3c0c59d76fac78978b5558e83c1f36 ""
  "/usr/share/texlive/texmf-dist/tex/generic/ulem/ulem.sty" 1338588421 23756 854c01b779030ff5b2aad88ba7a119f2 ""
  "/usr/share/texlive/texmf-dist/tex/latex/algorithms/algorithm.sty" 1251330371 3249 15763257e50278eef5db1952ccde229c ""
  "/usr/share/texlive/texmf-dist/tex/latex/algorithms/algorithmic.sty" 1251330371 9318 793e9d5a71e74e730d97f6bf5d7e2bca ""
  "/usr/share/texlive/texmf-dist/tex/latex/amscls/amsthm.sty" 1428861406 12225 3cca0d18522255979a1047206228b9d0 ""
  "/usr/share/texlive/texmf-dist/tex/latex/amsfonts/amsfonts.sty" 1359763108 5949 3f3fd50a8cc94c3d4cbf4fc66cd3df1c ""
  "/usr/share/texlive/texmf-dist/tex/latex/amsfonts/amssymb.sty" 1359763108 13829 94730e64147574077f8ecfea9bb69af4 ""
  "/usr/share/texlive/texmf-dist/tex/latex/amsfonts/umsa.fd" 1359763108 961 6518c6525a34feb5e8250ffa91731cff ""
  "/usr/share/texlive/texmf-dist/tex/latex/amsfonts/umsb.fd" 1359763108 961 d02606146ba5601b5645f987c92e6193 ""
  "/usr/share/texlive/texmf-dist/tex/latex/amsmath/amsbsy.sty" 1456875012 2210 5c54ab129b848a5071554186d0168766 ""
  "/usr/share/texlive/texmf-dist/tex/latex/amsmath/amsgen.sty" 1456875012 4160 c115536cf8d4ff25aa8c1c9bc4ecb79a ""
  "/usr/share/texlive/texmf-dist/tex/latex/amsmath/amsmath.sty" 1467147727 82033 ff9a037b5bad3f86db2c1a9e5c8160c3 ""
  "/usr/share/texlive/texmf-dist/tex/latex/amsmath/amsopn.sty" 1459635588 4115 318a66090112f3aa3f415aeb6fe8540f ""
  "/usr/share/texlive/texmf-dist/tex/latex/amsmath/amstext.sty" 1456875012 2431 fe3078ec12fc30287f568596f8e0b948 ""
  "/usr/share/texlive/texmf-dist/tex/latex/base/article.cls" 1459635588 19821 310da678527a7dfe2a02c88af38079b7 ""
  "/usr/share/texlive/texmf-dist/tex/latex/base/fixltx2e.sty" 1454284088 1953 d477a3557caea87a6f6b4c58d0b3e849 ""
  "/usr/share/texlive/texmf-dist/tex/latex/base/fleqn.clo" 1454284088 4752 e6541bbabe8ceb1dafbe3f372f1cb368 ""
  "/usr/share/texlive/texmf-dist/tex/latex/base/fontenc.sty" 1466892768 4572 491af33437ca0d58d7c6fc841903254d ""
  "/usr/share/texlive/texmf-dist/tex/latex/base/ifthen.sty" 1454284088 5159 a08c9bbd48fc492f15b22e458bef961f ""
  "/usr/share/texlive/texmf-dist/tex/latex/base/inputenc.sty" 1459635588 4732 d63eda807ac82cca2ca8488efd31a966 ""
  "/usr/share/texlive/texmf-dist/tex/latex/base/omsenc.dfu" 1459635588 2004 b59846258a6c54fecbe43d981c7a8310 ""
  "/usr/share/texlive/texmf-dist/tex/latex/base/ot1enc.dfu" 1459635588 3181 f6d8c97e5b5009a3b4a1e34490b9aa0d ""
  "/usr/share/texlive/texmf-dist/tex/latex/base/size10.clo" 1459635588 8292 e897c12e1e886ce77fe26afc5d470886 ""
  "/usr/share/texlive/texmf-dist/tex/latex/base/t1enc.def" 1466892768 10007 f99a4aa1774581d2f64e8a8f663c4c2a ""
  "/usr/share/texlive/texmf-dist/tex/latex/base/t1enc.dfu" 1459635588 11059 f4f43783cf4a8ffee1b201d897840536 ""
  "/usr/share/texlive/texmf-dist/tex/latex/base/textcomp.sty" 1466892768 16155 1316b351af259c7c28dcfb26e27d844e ""
  "/usr/share/texlive/texmf-dist/tex/latex/base/ts1cmr.fd" 1454284088 2217 d274654bda1292013bdf48d5f720a495 ""
  "/usr/share/texlive/texmf-dist/tex/latex/base/ts1enc.def" 1454284088 7767 aa88823823f5e767d79ea1166ab1ae74 ""
  "/usr/share/texlive/texmf-dist/tex/latex/base/ts1enc.dfu" 1459635588 4919 979e338591a58737681262cb4f7ab471 ""
  "/usr/share/texlive/texmf-dist/tex/latex/base/utf8.def" 1459635588 7784 02e454c0f50491e8730511d8fcc96a47 ""
  "/usr/share/texlive/texmf-dist/tex/latex/bezos/accents.sty" 1287181805 6919 4d8e953be6e2c3cc4cc3d9942a582fd2 ""
  "/usr/share/texlive/texmf-dist/tex/latex/cancel/cancel.sty" 1388445839 7592 dd751af313a16a0308545d5bfd7aaaa2 ""
  "/usr/share/texlive/texmf-dist/tex/latex/caption/caption.sty" 1456094605 66233 8b81cfab95a1f8fc2f0f6c89415b087a ""
  "/usr/share/texlive/texmf-dist/tex/latex/caption/caption3.sty" 1465747931 64866 1ea74c5f2d1685881497f021b8f186b2 ""
  "/usr/share/texlive/texmf-dist/tex/latex/chngcntr/chngcntr.sty" 1252025909 4063 effd8d02c8357a7a1b0c045c4e25e292 ""
  "/usr/share/texlive/texmf-dist/tex/latex/colortbl/colortbl.sty" 1329267615 10607 9635c8e2bffccf182429bfdea9b665a5 ""
  "/usr/share/texlive/texmf-dist/tex/latex/float/float.sty" 1137110151 6749 16d2656a1984957e674b149555f1ea1d ""
  "/usr/share/texlive/texmf-dist/tex/latex/graphics-cfg/color.cfg" 1459978653 1213 620bba36b25224fa9b7e1ccb4ecb76fd ""
  "/usr/share/texlive/texmf-dist/tex/latex/graphics-cfg/graphics.cfg" 1465944070 1224 978390e9c2234eab29404bc21b268d1e ""
  "/usr/share/texlive/texmf-dist/tex/latex/graphics-def/pdftex.def" 1468449179 57848 020e44545ff7e21278b080e3175d3354 ""
  "/usr/share/texlive/texmf-dist/tex/latex/graphics/color.sty" 1468449256 7031 4ca2945c73eec4e726c0da188fbbf50f ""
  "/usr/share/texlive/texmf-dist/tex/latex/graphics/graphics.sty" 1468449256 14539 727a4716746112f20fd860d095ccebd2 ""
  "/usr/share/texlive/texmf-dist/tex/latex/graphics/graphicx.sty" 1428932888 8125 557ab9f1bfa80d369fb45a914aa8a3b4 ""
  "/usr/share/texlive/texmf-dist/tex/latex/graphics/keyval.sty" 1428932888 2594 d18d5e19aa8239cf867fa670c556d2e9 ""
  "/usr/share/texlive/texmf-dist/tex/latex/graphics/rotating.sty" 1465944056 6969 1d8fff8bdc58419ff4aa42a9a2d43651 ""
  "/usr/share/texlive/texmf-dist/tex/latex/graphics/trig.sty" 1454284088 3980 0a268fbfda01e381fa95821ab13b6aee ""
  "/usr/share/texlive/texmf-dist/tex/latex/hyperref/hpdftex.def" 1466892657 51978 f1d34923659498bd6d816d7fe15b356e ""
  "/usr/share/texlive/texmf-dist/tex/latex/hyperref/hyperref.sty" 1466892657 233481 0da6f5dacc5df65592ac4c73f69829e5 ""
  "/usr/share/texlive/texmf-dist/tex/latex/hyperref/nameref.sty" 1465687530 12949 81e4e808884a8f0e276b69410e234656 ""
  "/usr/share/texlive/texmf-dist/tex/latex/hyperref/pd1enc.def" 1466892657 14093 b414ff8970a428e35fbcf21703e80980 ""
  "/usr/share/texlive/texmf-dist/tex/latex/latexconfig/epstopdf-sys.cfg" 1279039959 678 4792914a8f45be57bb98413425e4c7af ""
  "/usr/share/texlive/texmf-dist/tex/latex/latexconfig/hyperref.cfg" 1254097189 235 6031e5765137be07eed51a510b2b8fb7 ""
  "/usr/share/texlive/texmf-dist/tex/latex/lineno/lineno.sty" 1159951381 151738 8cd767481920f0eb785302dacfc87057 ""
  "/usr/share/texlive/texmf-dist/tex/latex/makecell/makecell.sty" 1249334690 15773 2dd7dde1ec1c2a3d0c85bc3b273e04d8 ""
  "/usr/share/texlive/texmf-dist/tex/latex/ms/everysel.sty" 1320274502 4623 936bfb87af7b91b6496a2317f80db16b ""
  "/usr/share/texlive/texmf-dist/tex/latex/ms/ragged2e.sty" 1244852698 9938 95cd4dc3edfd2c1a9e8f3f4cc43db1ce ""
  "/usr/share/texlive/texmf-dist/tex/latex/multirow/multirow.sty" 1137110401 7374 f7c1f13fc632dd5c9b220a247d233082 ""
  "/usr/share/texlive/texmf-dist/tex/latex/oberdiek/auxhook.sty" 1463608860 3834 4363110eb0ef1eb2b71c8fcbcdb6c357 ""
  "/usr/share/texlive/texmf-dist/tex/latex/oberdiek/epstopdf-base.sty" 1463608860 12095 5337833c991d80788a43d3ce26bd1c46 ""
  "/usr/share/texlive/texmf-dist/tex/latex/oberdiek/grfext.sty" 1463608860 7075 2fe3d848bba95f139de11ded085e74aa ""
  "/usr/share/texlive/texmf-dist/tex/latex/oberdiek/kvoptions.sty" 1463608860 22417 1d9df1eb66848aa31b18a593099cf45c ""
  "/usr/share/texlive/texmf-dist/tex/latex/oberdiek/rerunfilecheck.sty" 1463608860 9581 023642318cef9f4677efe364de1e2a27 ""
  "/usr/share/texlive/texmf-dist/tex/latex/oberdiek/settobox.sty" 1463608860 2595 ef2ceb1bb5b891d0ac835a3fe9cd751c ""
  "/usr/share/texlive/texmf-dist/tex/latex/psnfss/pifont.sty" 1156702453 2284 330328193b4aeb08dd45b0dd3e5ae732 ""
  "/usr/share/texlive/texmf-dist/tex/latex/psnfss/t1phv.fd" 1137110629 1488 9a55ac1cde6b4798a7f56844bb75a553 ""
  "/usr/share/texlive/texmf-dist/tex/latex/psnfss/t1ptm.fd" 1137110629 774 61d7da1e9f9e74989b196d147e623736 ""
  "/usr/share/texlive/texmf-dist/tex/latex/psnfss/times.sty" 1156702453 857 6c716f26c5eadfb81029fcd6ce2d45e6 ""
  "/usr/share/texlive/texmf-dist/tex/latex/psnfss/ts1ptm.fd" 1137110629 619 96f56dc5d1ef1fe1121f1cfeec70ee0c ""
  "/usr/share/texlive/texmf-dist/tex/latex/psnfss/upsy.fd" 1137110629 148 2da0acd77cba348f34823f44cabf0058 ""
  "/usr/share/texlive/texmf-dist/tex/latex/psnfss/upzd.fd" 1137110629 148 b2a94082cb802f90d3daf6dd0c7188a0 ""
  "/usr/share/texlive/texmf-dist/tex/latex/sidecap/sidecap.sty" 1137110811 10526 e4fd75d883a0e21600bac6a209f020eb ""
  "/usr/share/texlive/texmf-dist/tex/latex/subfigure/subfigure.cfg" 1167176009 2062 a0e7d66e09e508f51289a656aec06ed2 ""
  "/usr/share/texlive/texmf-dist/tex/latex/subfigure/subfigure.sty" 1167176009 15188 91281c7ddbccfa54a8e0c3b56ab5aa72 ""
  "/usr/share/texlive/texmf-dist/tex/latex/subfloat/subfloat.sty" 1137110886 5855 bcc2767388c24c6f9147976bf7f2c794 ""
  "/usr/share/texlive/texmf-dist/tex/latex/supertabular/supertabular.sty" 1137110892 14283 563cabe54cdab0459534c65c66672d04 ""
  "/usr/share/texlive/texmf-dist/tex/latex/tools/array.sty" 1459635588 12398 bd782945c489f84ff012bcea4a712d25 ""
  "/usr/share/texlive/texmf-dist/tex/latex/tools/multicol.sty" 1462659744 29824 08f95a42addbc2524015cbf3bc7ad24a ""
  "/usr/share/texlive/texmf-dist/tex/latex/tools/tabularx.sty" 1459635588 7141 64e8a94c3d083215654cd9a5b9dcc136 ""
  "/usr/share/texlive/texmf-dist/tex/latex/url/url.sty" 1388531844 12796 8edb7d69a20b857904dd0ea757c14ec9 ""
  "/usr/share/texlive/texmf-dist/tex/latex/xcolor/xcolor.sty" 1463002160 55589 34128738f682d033422ca125f82e5d62 ""
  "/usr/share/texlive/texmf-dist/web2c/texmf.cnf" 1471618383 31348 3c11c993a1d7e4662292855f9f7c8e1b ""
  "/usr/share/texmf/web2c/texmf.cnf" 1471618383 31348 3c11c993a1d7e4662292855f9f7c8e1b ""
  "/var/lib/texmf/fonts/map/pdftex/updmap/pdftex.map" 1515832058 2048181 61793b81b24e6f0d4756e3f9109ee541 ""
  "/var/lib/texmf/web2c/pdftex/pdflatex.fmt" 1515831539 3872147 959bb87d71342fe721f581496411a0cf ""
  "copernicus.cfg" 1534242062 37467 b1e353ed4451eaa7147bd6f891bb6554 ""
  "copernicus.cls" 1534242062 84261 99f9fc2be88f7aad11e793c372e03339 ""
  "fig/AnnualPrecipitation_hist.png" 1534242063 133172 269a3002d6874e01197f17a5c6cb5f2d ""
  "fig/AnnualSpatial.png" 1534242065 158008 0d45ce32911981900edfd1f86170099c ""
  "fig/Bhuntar_annual_pre.png" 1534242063 228545 c53c54c8dfd7dc7b750ac74b359b594f ""
  "fig/Bhuntar_month_pre.png" 1534242065 173499 7260f303d5258b8fa2e746c445738c74 ""
  "fig/MonPrec.png" 1534242064 110721 c80a673e44197f64ac6da082f2e3e8d7 ""
  "fig/SmallBox_done.png" 1534242064 741089 5fec3ffb9f3e6dee2f10440038eaffd3 ""
  "fig/StudyArea.png" 1534242064 8524106 1fc914fd413f63726116aba97656cc7b ""
  "fig/SumSpatialTrend_hist.png" 1534242063 147029 d72efa2e986729afd8b80097a259b13e ""
  "fig/Tp_SpatialSeason_done.png" 1534242065 170584 f0f658b26edf7c2d4d9c2324c18ad883 ""
  "fig/WinSpatialTrend_hist.png" 1534242062 122349 ab6abd5bacea2ca5c3742336610e1669 ""
  "fig/acc_prec_disc.png" 1534242065 214297 93392f6c8ed2f4f4ffb06ea7e56c393a ""
  "fig/ncdc.png" 1534242065 65098 6a8fe2cc17a6f93ee8f7678bb0d5bc39 ""
  "fig/plot_SumSpatialTrend_done.png" 1534242065 28480 574a2c818bb678d14d247b40e2ccf5a8 ""
  "fig/plot_WinSpatialTrend_done.png" 1534242065 26010 61fdaacd628de8bbbc086e02d01e85e0 ""
  "fig/resample_AnnualSpatial.png" 1534242066 62713 8797e72b02a9c9fddc4b2bed051c42b9 ""
  "fig/winterHGT_T2_WRF.png" 1534242065 875558 de0dd20cf9b36a9a1635155ac694402d ""
  "natbib.sty" 1534242062 36061 f2675b2a662f3a410761b7189b6c066e ""
  "slashbox.sty" 1534242062 2685 ce2190dc09125c3010b0dfd2226dd182 ""
  "template.aux" 1534250876 21952 f3ffc5a8ec41c40854d5c62f311a5fef ""
  "template.bbl" 1534250861 11088 3fbaaee83d3a54653947c16c54037005 "bibtex template"
  "template.tex" 1534242934 50553 2b2d6d668298950e8691680ba4fe25ce ""
  (generated)
  "template.aux"
  "template.log"
  "template.pdf"
