# Supplementary material for: Precipitation pattern in the Western Himalayas revealed by four datasets
Source: Copernicus journal article supplement (doi:10.5194/hess-22-5097-2018), 2018-10-04
Supplement: Supplementary file 1 [file hess-22-5097-2018-supplement.zip › template.fls]

PWD /latexmk
INPUT /etc/texmf/web2c/texmf.cnf
INPUT /usr/share/texmf/web2c/texmf.cnf
INPUT /usr/share/texlive/texmf-dist/web2c/texmf.cnf
INPUT /var/lib/texmf/web2c/pdftex/pdflatex.fmt
INPUT template.tex
OUTPUT template.log
INPUT copernicus.cls
INPUT copernicus.cls
INPUT /usr/share/texlive/texmf-dist/tex/latex/base/fixltx2e.sty
INPUT /usr/share/texlive/texmf-dist/tex/latex/base/fixltx2e.sty
INPUT copernicus.cfg
INPUT copernicus.cfg
INPUT /usr/share/texlive/texmf-dist/tex/latex/base/article.cls
INPUT /usr/share/texlive/texmf-dist/tex/latex/base/article.cls
INPUT /usr/share/texlive/texmf-dist/tex/latex/base/fleqn.clo
INPUT /usr/share/texlive/texmf-dist/tex/latex/base/fleqn.clo
INPUT /usr/share/texlive/texmf-dist/tex/latex/base/size10.clo
INPUT /usr/share/texlive/texmf-dist/tex/latex/base/size10.clo
INPUT /usr/share/texlive/texmf-dist/tex/latex/base/fontenc.sty
INPUT /usr/share/texlive/texmf-dist/tex/latex/base/fontenc.sty
INPUT /usr/share/texlive/texmf-dist/tex/latex/base/t1enc.def
INPUT /usr/share/texlive/texmf-dist/tex/latex/base/t1enc.def
INPUT /usr/share/texlive/texmf-dist/fonts/map/fontname/texfonts.map
INPUT /usr/share/texlive/texmf-dist/fonts/tfm/jknappen/ec/ecrm1000.tfm
INPUT /usr/share/texlive/texmf-dist/tex/latex/base/textcomp.sty
INPUT /usr/share/texlive/texmf-dist/tex/latex/base/textcomp.sty
INPUT /usr/share/texlive/texmf-dist/tex/latex/base/ts1enc.def
INPUT /usr/share/texlive/texmf-dist/tex/latex/base/ts1enc.def
INPUT /usr/share/texlive/texmf-dist/tex/latex/base/inputenc.sty
INPUT /usr/share/texlive/texmf-dist/tex/latex/base/inputenc.sty
INPUT /usr/share/texlive/texmf-dist/tex/latex/base/utf8.def
INPUT /usr/share/texlive/texmf-dist/tex/latex/base/utf8.def
INPUT /usr/share/texlive/texmf-dist/tex/latex/base/t1enc.dfu
INPUT /usr/share/texlive/texmf-dist/tex/latex/base/t1enc.dfu
INPUT /usr/share/texlive/texmf-dist/tex/latex/base/ot1enc.dfu
INPUT /usr/share/texlive/texmf-dist/tex/latex/base/ot1enc.dfu
INPUT /usr/share/texlive/texmf-dist/tex/latex/base/omsenc.dfu
INPUT /usr/share/texlive/texmf-dist/tex/latex/base/omsenc.dfu
INPUT /usr/share/texlive/texmf-dist/tex/latex/base/ts1enc.dfu
INPUT /usr/share/texlive/texmf-dist/tex/latex/base/ts1enc.dfu
INPUT /usr/share/texlive/texmf-dist/tex/generic/babel/babel.sty
INPUT /usr/share/texlive/texmf-dist/tex/generic/babel/babel.sty
INPUT /usr/share/texlive/texmf-dist/tex/generic/babel-english/english.ldf
INPUT /usr/share/texlive/texmf-dist/tex/generic/babel-english/english.ldf
INPUT /usr/share/texlive/texmf-dist/tex/generic/babel-english/english.ldf
INPUT /usr/share/texlive/texmf-dist/tex/generic/babel/babel.def
INPUT /usr/share/texlive/texmf-dist/tex/latex/tools/array.sty
INPUT /usr/share/texlive/texmf-dist/tex/latex/tools/array.sty
INPUT /usr/share/texlive/texmf-dist/tex/latex/tools/tabularx.sty
INPUT /usr/share/texlive/texmf-dist/tex/latex/tools/tabularx.sty
INPUT /usr/share/texlive/texmf-dist/tex/latex/graphics/graphicx.sty
INPUT /usr/share/texlive/texmf-dist/tex/latex/graphics/graphicx.sty
INPUT /usr/share/texlive/texmf-dist/tex/latex/graphics/graphicx.sty
INPUT /usr/share/texlive/texmf-dist/tex/latex/graphics/keyval.sty
INPUT /usr/share/texlive/texmf-dist/tex/latex/graphics/keyval.sty
INPUT /usr/share/texlive/texmf-dist/tex/latex/graphics/graphics.sty
INPUT /usr/share/texlive/texmf-dist/tex/latex/graphics/graphics.sty
INPUT /usr/share/texlive/texmf-dist/tex/latex/graphics/trig.sty
INPUT /usr/share/texlive/texmf-dist/tex/latex/graphics/trig.sty
INPUT /usr/share/texlive/texmf-dist/tex/latex/graphics-cfg/graphics.cfg
INPUT /usr/share/texlive/texmf-dist/tex/latex/graphics-cfg/graphics.cfg
INPUT /usr/share/texlive/texmf-dist/tex/latex/graphics-def/pdftex.def
INPUT /usr/share/texlive/texmf-dist/tex/latex/graphics-def/pdftex.def
INPUT /usr/share/texlive/texmf-dist/tex/generic/oberdiek/infwarerr.sty
INPUT /usr/share/texlive/texmf-dist/tex/generic/oberdiek/infwarerr.sty
INPUT /usr/share/texlive/texmf-dist/tex/generic/oberdiek/ltxcmds.sty
INPUT /usr/share/texlive/texmf-dist/tex/generic/oberdiek/ltxcmds.sty
INPUT /usr/share/texlive/texmf-dist/tex/latex/graphics/color.sty
INPUT /usr/share/texlive/texmf-dist/tex/latex/graphics/color.sty
INPUT /usr/share/texlive/texmf-dist/tex/latex/graphics/color.sty
INPUT /usr/share/texlive/texmf-dist/tex/latex/graphics-cfg/color.cfg
INPUT /usr/share/texlive/texmf-dist/tex/latex/graphics-cfg/color.cfg
INPUT /usr/share/texlive/texmf-dist/tex/latex/amsfonts/amssymb.sty
INPUT /usr/share/texlive/texmf-dist/tex/latex/amsfonts/amssymb.sty
INPUT /usr/share/texlive/texmf-dist/tex/latex/amsfonts/amssymb.sty
INPUT /usr/share/texlive/texmf-dist/tex/latex/amsfonts/amsfonts.sty
INPUT /usr/share/texlive/texmf-dist/tex/latex/amsfonts/amsfonts.sty
INPUT /usr/share/texlive/texmf-dist/tex/latex/amsmath/amsmath.sty
INPUT /usr/share/texlive/texmf-dist/tex/latex/amsmath/amsmath.sty
INPUT /usr/share/texlive/texmf-dist/tex/latex/amsmath/amsmath.sty
INPUT /usr/share/texlive/texmf-dist/tex/latex/amsmath/amstext.sty
INPUT /usr/share/texlive/texmf-dist/tex/latex/amsmath/amstext.sty
INPUT /usr/share/texlive/texmf-dist/tex/latex/amsmath/amsgen.sty
INPUT /usr/share/texlive/texmf-dist/tex/latex/amsmath/amsgen.sty
INPUT /usr/share/texlive/texmf-dist/tex/latex/amsmath/amsbsy.sty
INPUT /usr/share/texlive/texmf-dist/tex/latex/amsmath/amsbsy.sty
INPUT /usr/share/texlive/texmf-dist/tex/latex/amsmath/amsopn.sty
INPUT /usr/share/texlive/texmf-dist/tex/latex/amsmath/amsopn.sty
INPUT /usr/share/texlive/texmf-dist/tex/latex/amscls/amsthm.sty
INPUT /usr/share/texlive/texmf-dist/tex/latex/amscls/amsthm.sty
INPUT /usr/share/texlive/texmf-dist/tex/latex/url/url.sty
INPUT /usr/share/texlive/texmf-dist/tex/latex/url/url.sty
INPUT /usr/share/texlive/texmf-dist/tex/latex/url/url.sty
INPUT /usr/share/texlive/texmf-dist/tex/latex/bezos/accents.sty
INPUT /usr/share/texlive/texmf-dist/tex/latex/bezos/accents.sty
INPUT /usr/share/texlive/texmf-dist/tex/latex/bezos/accents.sty
INPUT /usr/share/texlive/texmf-dist/tex/latex/cancel/cancel.sty
INPUT /usr/share/texlive/texmf-dist/tex/latex/cancel/cancel.sty
INPUT /usr/share/texlive/texmf-dist/tex/latex/cancel/cancel.sty
INPUT /usr/share/texlive/texmf-dist/tex/latex/multirow/multirow.sty
INPUT /usr/share/texlive/texmf-dist/tex/latex/multirow/multirow.sty
INPUT /usr/share/texlive/texmf-dist/tex/latex/multirow/multirow.sty
INPUT /usr/share/texlive/texmf-dist/tex/latex/supertabular/supertabular.sty
INPUT /usr/share/texlive/texmf-dist/tex/latex/supertabular/supertabular.sty
INPUT /usr/share/texlive/texmf-dist/tex/latex/supertabular/supertabular.sty
INPUT /usr/share/texlive/texmf-dist/tex/latex/algorithms/algorithmic.sty
INPUT /usr/share/texlive/texmf-dist/tex/latex/algorithms/algorithmic.sty
INPUT /usr/share/texlive/texmf-dist/tex/latex/algorithms/algorithmic.sty
INPUT /usr/share/texlive/texmf-dist/tex/latex/base/ifthen.sty
INPUT /usr/share/texlive/texmf-dist/tex/latex/base/ifthen.sty
INPUT /usr/share/texlive/texmf-dist/tex/latex/algorithms/algorithm.sty
INPUT /usr/share/texlive/texmf-dist/tex/latex/algorithms/algorithm.sty
INPUT /usr/share/texlive/texmf-dist/tex/latex/algorithms/algorithm.sty
INPUT /usr/share/texlive/texmf-dist/tex/latex/float/float.sty
INPUT /usr/share/texlive/texmf-dist/tex/latex/float/float.sty
INPUT /usr/share/texlive/texmf-dist/tex/latex/caption/caption.sty
INPUT /usr/share/texlive/texmf-dist/tex/latex/caption/caption.sty
INPUT /usr/share/texlive/texmf-dist/tex/latex/caption/caption.sty
INPUT /usr/share/texlive/texmf-dist/tex/latex/caption/caption3.sty
INPUT /usr/share/texlive/texmf-dist/tex/latex/caption/caption3.sty
INPUT /usr/share/texlive/texmf-dist/tex/latex/subfloat/subfloat.sty
INPUT /usr/share/texlive/texmf-dist/tex/latex/subfloat/subfloat.sty
INPUT /usr/share/texlive/texmf-dist/tex/latex/subfloat/subfloat.sty
INPUT natbib.sty
INPUT natbib.sty
INPUT /usr/share/texlive/texmf-dist/tex/latex/graphics/rotating.sty
INPUT /usr/share/texlive/texmf-dist/tex/latex/graphics/rotating.sty
INPUT /usr/share/texlive/texmf-dist/tex/latex/lineno/lineno.sty
INPUT /usr/share/texlive/texmf-dist/tex/latex/lineno/lineno.sty
INPUT /usr/share/texlive/texmf-dist/tex/latex/lineno/lineno.sty
INPUT /usr/share/texlive/texmf-dist/tex/latex/psnfss/times.sty
INPUT /usr/share/texlive/texmf-dist/tex/latex/psnfss/times.sty
INPUT /usr/share/texlive/texmf-dist/tex/latex/psnfss/times.sty
INPUT /usr/share/texlive/texmf-dist/tex/latex/psnfss/pifont.sty
INPUT /usr/share/texlive/texmf-dist/tex/latex/psnfss/pifont.sty
INPUT /usr/share/texlive/texmf-dist/tex/latex/psnfss/upzd.fd
INPUT /usr/share/texlive/texmf-dist/tex/latex/psnfss/upzd.fd
INPUT /usr/share/texlive/texmf-dist/fonts/tfm/adobe/zapfding/pzdr.tfm
INPUT /usr/share/texlive/texmf-dist/tex/latex/psnfss/upsy.fd
INPUT /usr/share/texlive/texmf-dist/tex/latex/psnfss/upsy.fd
INPUT /usr/share/texlive/texmf-dist/fonts/tfm/adobe/symbol/psyr.tfm
INPUT /usr/share/texlive/texmf-dist/tex/latex/hyperref/hyperref.sty
INPUT /usr/share/texlive/texmf-dist/tex/latex/hyperref/hyperref.sty
INPUT /usr/share/texlive/texmf-dist/tex/generic/oberdiek/hobsub-hyperref.sty
INPUT /usr/share/texlive/texmf-dist/tex/generic/oberdiek/hobsub-hyperref.sty
INPUT /usr/share/texlive/texmf-dist/tex/generic/oberdiek/hobsub-hyperref.sty
INPUT /usr/share/texlive/texmf-dist/tex/generic/oberdiek/hobsub-generic.sty
INPUT /usr/share/texlive/texmf-dist/tex/generic/oberdiek/hobsub-generic.sty
INPUT /usr/share/texlive/texmf-dist/tex/generic/ifxetex/ifxetex.sty
INPUT /usr/share/texlive/texmf-dist/tex/generic/ifxetex/ifxetex.sty
INPUT /usr/share/texlive/texmf-dist/tex/latex/oberdiek/auxhook.sty
INPUT /usr/share/texlive/texmf-dist/tex/latex/oberdiek/auxhook.sty
INPUT /usr/share/texlive/texmf-dist/tex/latex/oberdiek/kvoptions.sty
INPUT /usr/share/texlive/texmf-dist/tex/latex/oberdiek/kvoptions.sty
INPUT /usr/share/texlive/texmf-dist/tex/latex/hyperref/pd1enc.def
INPUT /usr/share/texlive/texmf-dist/tex/latex/hyperref/pd1enc.def
INPUT /usr/share/texlive/texmf-dist/tex/latex/latexconfig/hyperref.cfg
INPUT /usr/share/texlive/texmf-dist/tex/latex/latexconfig/hyperref.cfg
INPUT /usr/share/texlive/texmf-dist/tex/latex/hyperref/hpdftex.def
INPUT /usr/share/texlive/texmf-dist/tex/latex/hyperref/hpdftex.def
INPUT /usr/share/texlive/texmf-dist/tex/latex/oberdiek/rerunfilecheck.sty
INPUT /usr/share/texlive/texmf-dist/tex/latex/oberdiek/rerunfilecheck.sty
INPUT /usr/share/texlive/texmf-dist/tex/latex/lineno/lineno.sty
INPUT /usr/share/texlive/texmf-dist/tex/latex/sidecap/sidecap.sty
INPUT /usr/share/texlive/texmf-dist/tex/latex/sidecap/sidecap.sty
INPUT /usr/share/texlive/texmf-dist/tex/latex/subfigure/subfigure.sty
INPUT /usr/share/texlive/texmf-dist/tex/latex/subfigure/subfigure.sty
INPUT /usr/share/texlive/texmf-dist/tex/latex/subfigure/subfigure.cfg
INPUT /usr/share/texlive/texmf-dist/tex/latex/subfigure/subfigure.cfg
INPUT /usr/share/texlive/texmf-dist/tex/latex/xcolor/xcolor.sty
INPUT /usr/share/texlive/texmf-dist/tex/latex/xcolor/xcolor.sty
INPUT /usr/share/texlive/texmf-dist/tex/latex/graphics-cfg/color.cfg
INPUT /usr/share/texlive/texmf-dist/tex/latex/graphics-cfg/color.cfg
INPUT /usr/share/texlive/texmf-dist/tex/latex/colortbl/colortbl.sty
INPUT /usr/share/texlive/texmf-dist/tex/latex/colortbl/colortbl.sty
INPUT slashbox.sty
INPUT slashbox.sty
INPUT /usr/share/texlive/texmf-dist/tex/latex/tools/multicol.sty
INPUT /usr/share/texlive/texmf-dist/tex/latex/tools/multicol.sty
INPUT /usr/share/texlive/texmf-dist/tex/latex/makecell/makecell.sty
INPUT /usr/share/texlive/texmf-dist/tex/latex/makecell/makecell.sty
INPUT /usr/share/texlive/texmf-dist/tex/latex/chngcntr/chngcntr.sty
INPUT /usr/share/texlive/texmf-dist/tex/latex/chngcntr/chngcntr.sty
INPUT /usr/share/texlive/texmf-dist/tex/generic/ulem/ulem.sty
INPUT /usr/share/texlive/texmf-dist/tex/generic/ulem/ulem.sty
INPUT /usr/share/texlive/texmf-dist/fonts/tfm/public/latex-fonts/lasy6.tfm
INPUT /usr/share/texlive/texmf-dist/tex/latex/oberdiek/settobox.sty
INPUT /usr/share/texlive/texmf-dist/tex/latex/oberdiek/settobox.sty
INPUT template.aux
INPUT template.aux
OUTPUT template.aux
INPUT /usr/share/texlive/texmf-dist/tex/latex/base/ts1cmr.fd
INPUT /usr/share/texlive/texmf-dist/tex/latex/base/ts1cmr.fd
INPUT /usr/share/texlive/texmf-dist/tex/latex/psnfss/t1ptm.fd
INPUT /usr/share/texlive/texmf-dist/tex/latex/psnfss/t1ptm.fd
INPUT /usr/share/texlive/texmf-dist/fonts/tfm/adobe/times/ptmr8t.tfm
INPUT /usr/share/texlive/texmf-dist/tex/context/base/mkii/supp-pdf.mkii
INPUT /usr/share/texlive/texmf-dist/tex/context/base/mkii/supp-pdf.mkii
INPUT /usr/share/texlive/texmf-dist/tex/latex/oberdiek/epstopdf-base.sty
INPUT /usr/share/texlive/texmf-dist/tex/latex/oberdiek/epstopdf-base.sty
INPUT /usr/share/texlive/texmf-dist/tex/latex/oberdiek/grfext.sty
INPUT /usr/share/texlive/texmf-dist/tex/latex/oberdiek/grfext.sty
INPUT /usr/share/texlive/texmf-dist/tex/latex/latexconfig/epstopdf-sys.cfg
INPUT /usr/share/texlive/texmf-dist/tex/latex/latexconfig/epstopdf-sys.cfg
INPUT /usr/share/texlive/texmf-dist/tex/latex/hyperref/nameref.sty
INPUT /usr/share/texlive/texmf-dist/tex/latex/hyperref/nameref.sty
INPUT /usr/share/texlive/texmf-dist/tex/generic/oberdiek/gettitlestring.sty
INPUT /usr/share/texlive/texmf-dist/tex/generic/oberdiek/gettitlestring.sty
OUTPUT template.pdf
INPUT /usr/share/texlive/texmf-dist/tex/latex/ms/ragged2e.sty
INPUT /usr/share/texlive/texmf-dist/tex/latex/ms/ragged2e.sty
INPUT /usr/share/texlive/texmf-dist/tex/latex/ms/ragged2e.sty
INPUT /usr/share/texlive/texmf-dist/tex/latex/ms/everysel.sty
INPUT /usr/share/texlive/texmf-dist/tex/latex/ms/everysel.sty
INPUT /usr/share/texlive/texmf-dist/fonts/tfm/adobe/times/ptmr8t.tfm
INPUT /usr/share/texlive/texmf-dist/fonts/tfm/adobe/times/ptmb8t.tfm
INPUT /usr/share/texlive/texmf-dist/fonts/tfm/public/amsfonts/cmextra/cmex7.tfm
INPUT /usr/share/texlive/texmf-dist/fonts/tfm/public/amsfonts/cmextra/cmex7.tfm
INPUT /usr/share/texlive/texmf-dist/tex/latex/amsfonts/umsa.fd
INPUT /usr/share/texlive/texmf-dist/tex/latex/amsfonts/umsa.fd
INPUT /usr/share/texlive/texmf-dist/fonts/tfm/public/amsfonts/symbols/msam10.tfm
INPUT /usr/share/texlive/texmf-dist/fonts/tfm/public/amsfonts/symbols/msam7.tfm
INPUT /usr/share/texlive/texmf-dist/fonts/tfm/public/amsfonts/symbols/msam5.tfm
INPUT /usr/share/texlive/texmf-dist/tex/latex/amsfonts/umsb.fd
INPUT /usr/share/texlive/texmf-dist/tex/latex/amsfonts/umsb.fd
INPUT /usr/share/texlive/texmf-dist/fonts/tfm/public/amsfonts/symbols/msbm10.tfm
INPUT /usr/share/texlive/texmf-dist/fonts/tfm/public/amsfonts/symbols/msbm7.tfm
INPUT /usr/share/texlive/texmf-dist/fonts/tfm/public/amsfonts/symbols/msbm5.tfm
INPUT /usr/share/texlive/texmf-dist/fonts/tfm/adobe/times/ptmr8t.tfm
INPUT /usr/share/texlive/texmf-dist/fonts/tfm/public/cm/cmr12.tfm
INPUT /usr/share/texlive/texmf-dist/fonts/tfm/public/cm/cmr8.tfm
INPUT /usr/share/texlive/texmf-dist/fonts/tfm/public/cm/cmr6.tfm
INPUT /usr/share/texlive/texmf-dist/fonts/tfm/public/cm/cmmi12.tfm
INPUT /usr/share/texlive/texmf-dist/fonts/tfm/public/cm/cmmi8.tfm
INPUT /usr/share/texlive/texmf-dist/fonts/tfm/public/cm/cmmi6.tfm
INPUT /usr/share/texlive/texmf-dist/fonts/tfm/public/cm/cmsy10.tfm
INPUT /usr/share/texlive/texmf-dist/fonts/tfm/public/cm/cmsy8.tfm
INPUT /usr/share/texlive/texmf-dist/fonts/tfm/public/cm/cmsy6.tfm
INPUT /usr/share/texlive/texmf-dist/fonts/tfm/public/cm/cmex10.tfm
INPUT /usr/share/texlive/texmf-dist/fonts/tfm/public/amsfonts/cmextra/cmex8.tfm
INPUT /usr/share/texlive/texmf-dist/fonts/tfm/public/amsfonts/cmextra/cmex7.tfm
INPUT /usr/share/texlive/texmf-dist/fonts/tfm/public/amsfonts/symbols/msam10.tfm
INPUT /usr/share/texlive/texmf-dist/fonts/tfm/public/amsfonts/symbols/msam10.tfm
INPUT /usr/share/texlive/texmf-dist/fonts/tfm/public/amsfonts/symbols/msam7.tfm
INPUT /usr/share/texlive/texmf-dist/fonts/tfm/public/amsfonts/symbols/msbm10.tfm
INPUT /usr/share/texlive/texmf-dist/fonts/tfm/public/amsfonts/symbols/msbm10.tfm
INPUT /usr/share/texlive/texmf-dist/fonts/tfm/public/amsfonts/symbols/msbm7.tfm
INPUT /usr/share/texlive/texmf-dist/fonts/tfm/adobe/times/ptmr8t.tfm
INPUT /usr/share/texlive/texmf-dist/fonts/tfm/adobe/times/ptmr8t.tfm
INPUT /usr/share/texlive/texmf-dist/fonts/tfm/adobe/times/ptmri8t.tfm
INPUT /usr/share/texlive/texmf-dist/fonts/tfm/adobe/times/ptmb8t.tfm
INPUT /usr/share/texlive/texmf-dist/fonts/tfm/adobe/times/ptmr8t.tfm
INPUT /usr/share/texlive/texmf-dist/tex/latex/psnfss/t1phv.fd
INPUT /usr/share/texlive/texmf-dist/tex/latex/psnfss/t1phv.fd
INPUT /usr/share/texlive/texmf-dist/fonts/tfm/adobe/helvetic/phvr8t.tfm
INPUT /usr/share/texlive/texmf-dist/fonts/vf/adobe/times/ptmb8t.vf
INPUT /usr/share/texlive/texmf-dist/fonts/tfm/adobe/times/ptmb8r.tfm
INPUT /var/lib/texmf/fonts/map/pdftex/updmap/pdftex.map
INPUT /usr/share/texlive/texmf-dist/fonts/vf/adobe/times/ptmr8t.vf
INPUT /usr/share/texlive/texmf-dist/fonts/tfm/adobe/times/ptmr8r.tfm
INPUT /usr/share/texlive/texmf-dist/fonts/vf/adobe/times/ptmr8t.vf
INPUT /usr/share/texlive/texmf-dist/fonts/tfm/adobe/times/ptmr8r.tfm
INPUT /usr/share/texlive/texmf-dist/fonts/vf/adobe/times/ptmr8t.vf
INPUT /usr/share/texlive/texmf-dist/fonts/tfm/adobe/times/ptmr8r.tfm
INPUT /usr/share/texlive/texmf-dist/fonts/vf/adobe/times/ptmr8t.vf
INPUT /usr/share/texlive/texmf-dist/fonts/tfm/adobe/times/ptmr8r.tfm
INPUT /usr/share/texlive/texmf-dist/fonts/vf/adobe/times/ptmri8t.vf
INPUT /usr/share/texlive/texmf-dist/fonts/tfm/adobe/times/ptmri8r.tfm
INPUT /usr/share/texlive/texmf-dist/fonts/vf/adobe/times/ptmb8t.vf
INPUT /usr/share/texlive/texmf-dist/fonts/tfm/adobe/times/ptmb8r.tfm
INPUT /usr/share/texlive/texmf-dist/fonts/vf/adobe/helvetic/phvr8t.vf
INPUT /usr/share/texlive/texmf-dist/fonts/tfm/adobe/helvetic/phvr8r.tfm
INPUT /usr/share/texlive/texmf-dist/fonts/tfm/adobe/times/ptmr8t.tfm
INPUT /usr/share/texlive/texmf-dist/tex/latex/psnfss/ts1ptm.fd
INPUT /usr/share/texlive/texmf-dist/tex/latex/psnfss/ts1ptm.fd
INPUT /usr/share/texlive/texmf-dist/fonts/tfm/adobe/times/ptmr8c.tfm
INPUT /usr/share/texlive/texmf-dist/fonts/vf/adobe/times/ptmr8t.vf
INPUT /usr/share/texlive/texmf-dist/fonts/tfm/adobe/times/ptmr8r.tfm
INPUT /usr/share/texlive/texmf-dist/fonts/vf/adobe/times/ptmr8c.vf
INPUT /usr/share/texlive/texmf-dist/fonts/tfm/adobe/times/ptmri8t.tfm
INPUT /usr/share/texlive/texmf-dist/fonts/tfm/public/cm/cmr9.tfm
INPUT /usr/share/texlive/texmf-dist/fonts/tfm/public/cm/cmmi9.tfm
INPUT /usr/share/texlive/texmf-dist/fonts/tfm/public/cm/cmsy9.tfm
INPUT /usr/share/texlive/texmf-dist/fonts/tfm/public/amsfonts/cmextra/cmex9.tfm
INPUT /usr/share/texlive/texmf-dist/fonts/tfm/public/amsfonts/symbols/msam10.tfm
INPUT /usr/share/texlive/texmf-dist/fonts/tfm/public/amsfonts/symbols/msbm10.tfm
INPUT /usr/share/texlive/texmf-dist/fonts/vf/adobe/times/ptmri8t.vf
INPUT /usr/share/texlive/texmf-dist/fonts/tfm/adobe/times/ptmri8r.tfm
INPUT /usr/share/texlive/texmf-dist/fonts/vf/adobe/times/ptmr8t.vf
INPUT /usr/share/texlive/texmf-dist/fonts/tfm/adobe/times/ptmr8r.tfm
INPUT template.bbl
INPUT template.bbl
INPUT fig/StudyArea.png
INPUT ./fig/StudyArea.png
INPUT ./fig/StudyArea.png
INPUT /usr/share/texlive/texmf-dist/fonts/tfm/adobe/times/ptmb8t.tfm
INPUT fig/AnnualSpatial.png
INPUT ./fig/AnnualSpatial.png
INPUT ./fig/AnnualSpatial.png
INPUT fig/AnnualPrecipitation_hist.png
INPUT ./fig/AnnualPrecipitation_hist.png
INPUT ./fig/AnnualPrecipitation_hist.png
INPUT fig/SmallBox_done.png
INPUT ./fig/SmallBox_done.png
INPUT ./fig/SmallBox_done.png
INPUT fig/Tp_SpatialSeason_done.png
INPUT ./fig/Tp_SpatialSeason_done.png
INPUT ./fig/Tp_SpatialSeason_done.png
INPUT fig/MonPrec.png
INPUT ./fig/MonPrec.png
INPUT ./fig/MonPrec.png
INPUT fig/plot_SumSpatialTrend_done.png
INPUT ./fig/plot_SumSpatialTrend_done.png
INPUT ./fig/plot_SumSpatialTrend_done.png
INPUT fig/SumSpatialTrend_hist.png
INPUT ./fig/SumSpatialTrend_hist.png
INPUT ./fig/SumSpatialTrend_hist.png
INPUT fig/plot_WinSpatialTrend_done.png
INPUT ./fig/plot_WinSpatialTrend_done.png
INPUT ./fig/plot_WinSpatialTrend_done.png
INPUT fig/WinSpatialTrend_hist.png
INPUT ./fig/WinSpatialTrend_hist.png
INPUT ./fig/WinSpatialTrend_hist.png
INPUT fig/Bhuntar_annual_pre.png
INPUT ./fig/Bhuntar_annual_pre.png
INPUT ./fig/Bhuntar_annual_pre.png
INPUT fig/Bhuntar_month_pre.png
INPUT ./fig/Bhuntar_month_pre.png
INPUT ./fig/Bhuntar_month_pre.png
INPUT fig/acc_prec_disc.png
INPUT ./fig/acc_prec_disc.png
INPUT ./fig/acc_prec_disc.png
INPUT fig/winterHGT_T2_WRF.png
INPUT ./fig/winterHGT_T2_WRF.png
INPUT ./fig/winterHGT_T2_WRF.png
INPUT /usr/share/texlive/texmf-dist/fonts/vf/adobe/times/ptmb8t.vf
INPUT /usr/share/texlive/texmf-dist/fonts/tfm/adobe/times/ptmb8r.tfm
INPUT /usr/share/texlive/texmf-dist/fonts/tfm/adobe/times/ptmbi8t.tfm
INPUT /usr/share/texlive/texmf-dist/fonts/vf/adobe/times/ptmbi8t.vf
INPUT /usr/share/texlive/texmf-dist/fonts/tfm/adobe/times/ptmbi8r.tfm
INPUT fig/resample_AnnualSpatial.png
INPUT ./fig/resample_AnnualSpatial.png
INPUT ./fig/resample_AnnualSpatial.png
INPUT fig/ncdc.png
INPUT ./fig/ncdc.png
INPUT ./fig/ncdc.png
INPUT template.aux
INPUT /usr/share/texlive/texmf-dist/fonts/enc/dvips/base/8r.enc
INPUT /usr/share/texlive/texmf-dist/fonts/type1/public/amsfonts/cm/cmsy10.pfb
INPUT /usr/share/texlive/texmf-dist/fonts/type1/public/amsfonts/cm/cmsy6.pfb
INPUT /usr/share/texlive/texmf-dist/fonts/type1/public/amsfonts/cm/cmsy7.pfb
INPUT /usr/share/texlive/texmf-dist/fonts/type1/public/amsfonts/cm/cmsy9.pfb
INPUT /usr/share/texlive/texmf-dist/fonts/type1/public/amsfonts/latxfont/line10.pfb
INPUT /usr/share/texlive/texmf-dist/fonts/type1/urw/helvetic/uhvr8a.pfb
INPUT /usr/share/texlive/texmf-dist/fonts/type1/urw/times/utmb8a.pfb
INPUT /usr/share/texlive/texmf-dist/fonts/type1/urw/times/utmbi8a.pfb
INPUT /usr/share/texlive/texmf-dist/fonts/type1/urw/times/utmr8a.pfb
INPUT /usr/share/texlive/texmf-dist/fonts/type1/urw/times/utmri8a.pfb
