# Supplementary material for: Precipitation pattern in the Western Himalayas revealed by four datasets
Source: Copernicus journal article supplement (doi:10.5194/hess-22-5097-2018), 2018-10-04
Supplement: Supplementary file 1 [file hess-22-5097-2018-supplement.zip › template.log]

This is pdfTeX, Version 3.14159265-2.6-1.40.17 (TeX Live 2016/Debian) (preloaded format=pdflatex 2018.1.13)  14 AUG 2018 12:47
entering extended mode
 \write18 enabled.
 file:line:error style messages enabled.
 %&-line parsing enabled.
**template.tex
(./template.tex
LaTeX2e <2016/03/31> patch level 3
Babel <3.9r> and hyphenation patterns for 83 language(s) loaded.
(./copernicus.cls
Document Class: copernicus 2016/08/16 8.15 Copernicus papers
(/usr/share/texlive/texmf-dist/tex/latex/base/fixltx2e.sty
Package: fixltx2e 2015/06/22 v2.0b fixes to LaTeX (obsolete)


Package fixltx2e Warning: fixltx2e is not required with releases after 2015
(fixltx2e)                All fixes are now in the LaTeX kernel.
(fixltx2e)                See the latexrelease package for details.

)
Additional configuration file copernicus.cfg used
(./copernicus.cfg) (/usr/share/texlive/texmf-dist/tex/latex/base/article.cls
Document Class: article 2014/09/29 v1.4h Standard LaTeX document class
(/usr/share/texlive/texmf-dist/tex/latex/base/fleqn.clo
File: fleqn.clo 2015/03/31 v1.1i Standard LaTeX option (flush left equations)
\mathindent=\dimen102
Applying: [2015/01/01] Make \[ robust on input line 50.
LaTeX Info: Redefining \[ on input line 51.
Already applied: [0000/00/00] Make \[ robust on input line 62.
Applying: [2015/01/01] Make \] robust on input line 74.
LaTeX Info: Redefining \] on input line 75.
Already applied: [0000/00/00] Make \] robust on input line 83.
)
(/usr/share/texlive/texmf-dist/tex/latex/base/size10.clo
File: size10.clo 2014/09/29 v1.4h Standard LaTeX file (size option)
)
\c@part=\count79
\c@section=\count80
\c@subsection=\count81
\c@subsubsection=\count82
\c@paragraph=\count83
\c@subparagraph=\count84
\c@figure=\count85
\c@table=\count86
\abovecaptionskip=\skip41
\belowcaptionskip=\skip42
\bibindent=\dimen103
)
\bleed=\dimen104
\longtwo@top=\skip43
\longtwo@bottom=\skip44
\longtwo@box=\box26

(/usr/share/texlive/texmf-dist/tex/latex/base/fontenc.sty
Package: fontenc 2016/06/19 v1.99m Standard LaTeX package

(/usr/share/texlive/texmf-dist/tex/latex/base/t1enc.def
File: t1enc.def 2016/06/19 v1.99m Standard LaTeX file
LaTeX Font Info:    Redeclaring font encoding T1 on input line 48.
))
(/usr/share/texlive/texmf-dist/tex/latex/base/textcomp.sty
Package: textcomp 2016/06/19 v1.99m Standard LaTeX package
Package textcomp Info: Sub-encoding information:
(textcomp)               5 = only ISO-Adobe without \textcurrency
(textcomp)               4 = 5 + \texteuro
(textcomp)               3 = 4 + \textohm
(textcomp)               2 = 3 + \textestimated + \textcurrency
(textcomp)               1 = TS1 - \textcircled - \t
(textcomp)               0 = TS1 (full)
(textcomp)             Font families with sub-encoding setting implement
(textcomp)             only a restricted character set as indicated.
(textcomp)             Family '?' is the default used for unknown fonts.
(textcomp)             See the documentation for details.
Package textcomp Info: Setting ? sub-encoding to TS1/1 on input line 79.

(/usr/share/texlive/texmf-dist/tex/latex/base/ts1enc.def
File: ts1enc.def 2001/06/05 v3.0e (jk/car/fm) Standard LaTeX file
)
LaTeX Info: Redefining \oldstylenums on input line 334.
Package textcomp Info: Setting cmr sub-encoding to TS1/0 on input line 349.
Package textcomp Info: Setting cmss sub-encoding to TS1/0 on input line 350.
Package textcomp Info: Setting cmtt sub-encoding to TS1/0 on input line 351.
Package textcomp Info: Setting cmvtt sub-encoding to TS1/0 on input line 352.
Package textcomp Info: Setting cmbr sub-encoding to TS1/0 on input line 353.
Package textcomp Info: Setting cmtl sub-encoding to TS1/0 on input line 354.
Package textcomp Info: Setting ccr sub-encoding to TS1/0 on input line 355.
Package textcomp Info: Setting ptm sub-encoding to TS1/4 on input line 356.
Package textcomp Info: Setting pcr sub-encoding to TS1/4 on input line 357.
Package textcomp Info: Setting phv sub-encoding to TS1/4 on input line 358.
Package textcomp Info: Setting ppl sub-encoding to TS1/3 on input line 359.
Package textcomp Info: Setting pag sub-encoding to TS1/4 on input line 360.
Package textcomp Info: Setting pbk sub-encoding to TS1/4 on input line 361.
Package textcomp Info: Setting pnc sub-encoding to TS1/4 on input line 362.
Package textcomp Info: Setting pzc sub-encoding to TS1/4 on input line 363.
Package textcomp Info: Setting bch sub-encoding to TS1/4 on input line 364.
Package textcomp Info: Setting put sub-encoding to TS1/5 on input line 365.
Package textcomp Info: Setting uag sub-encoding to TS1/5 on input line 366.
Package textcomp Info: Setting ugq sub-encoding to TS1/5 on input line 367.
Package textcomp Info: Setting ul8 sub-encoding to TS1/4 on input line 368.
Package textcomp Info: Setting ul9 sub-encoding to TS1/4 on input line 369.
Package textcomp Info: Setting augie sub-encoding to TS1/5 on input line 370.
Package textcomp Info: Setting dayrom sub-encoding to TS1/3 on input line 371.
Package textcomp Info: Setting dayroms sub-encoding to TS1/3 on input line 372.

Package textcomp Info: Setting pxr sub-encoding to TS1/0 on input line 373.
Package textcomp Info: Setting pxss sub-encoding to TS1/0 on input line 374.
Package textcomp Info: Setting pxtt sub-encoding to TS1/0 on input line 375.
Package textcomp Info: Setting txr sub-encoding to TS1/0 on input line 376.
Package textcomp Info: Setting txss sub-encoding to TS1/0 on input line 377.
Package textcomp Info: Setting txtt sub-encoding to TS1/0 on input line 378.
Package textcomp Info: Setting lmr sub-encoding to TS1/0 on input line 379.
Package textcomp Info: Setting lmdh sub-encoding to TS1/0 on input line 380.
Package textcomp Info: Setting lmss sub-encoding to TS1/0 on input line 381.
Package textcomp Info: Setting lmssq sub-encoding to TS1/0 on input line 382.
Package textcomp Info: Setting lmvtt sub-encoding to TS1/0 on input line 383.
Package textcomp Info: Setting lmtt sub-encoding to TS1/0 on input line 384.
Package textcomp Info: Setting qhv sub-encoding to TS1/0 on input line 385.
Package textcomp Info: Setting qag sub-encoding to TS1/0 on input line 386.
Package textcomp Info: Setting qbk sub-encoding to TS1/0 on input line 387.
Package textcomp Info: Setting qcr sub-encoding to TS1/0 on input line 388.
Package textcomp Info: Setting qcs sub-encoding to TS1/0 on input line 389.
Package textcomp Info: Setting qpl sub-encoding to TS1/0 on input line 390.
Package textcomp Info: Setting qtm sub-encoding to TS1/0 on input line 391.
Package textcomp Info: Setting qzc sub-encoding to TS1/0 on input line 392.
Package textcomp Info: Setting qhvc sub-encoding to TS1/0 on input line 393.
Package textcomp Info: Setting futs sub-encoding to TS1/4 on input line 394.
Package textcomp Info: Setting futx sub-encoding to TS1/4 on input line 395.
Package textcomp Info: Setting futj sub-encoding to TS1/4 on input line 396.
Package textcomp Info: Setting hlh sub-encoding to TS1/3 on input line 397.
Package textcomp Info: Setting hls sub-encoding to TS1/3 on input line 398.
Package textcomp Info: Setting hlst sub-encoding to TS1/3 on input line 399.
Package textcomp Info: Setting hlct sub-encoding to TS1/5 on input line 400.
Package textcomp Info: Setting hlx sub-encoding to TS1/5 on input line 401.
Package textcomp Info: Setting hlce sub-encoding to TS1/5 on input line 402.
Package textcomp Info: Setting hlcn sub-encoding to TS1/5 on input line 403.
Package textcomp Info: Setting hlcw sub-encoding to TS1/5 on input line 404.
Package textcomp Info: Setting hlcf sub-encoding to TS1/5 on input line 405.
Package textcomp Info: Setting pplx sub-encoding to TS1/3 on input line 406.
Package textcomp Info: Setting pplj sub-encoding to TS1/3 on input line 407.
Package textcomp Info: Setting ptmx sub-encoding to TS1/4 on input line 408.
Package textcomp Info: Setting ptmj sub-encoding to TS1/4 on input line 409.
)
(/usr/share/texlive/texmf-dist/tex/latex/base/inputenc.sty
Package: inputenc 2015/03/17 v1.2c Input encoding file
\inpenc@prehook=\toks14
\inpenc@posthook=\toks15

(/usr/share/texlive/texmf-dist/tex/latex/base/utf8.def
File: utf8.def 2016/02/28 v1.1s UTF-8 support for inputenc
Now handling font encoding OML ...
... no UTF-8 mapping file for font encoding OML
Now handling font encoding T1 ...
... processing UTF-8 mapping file for font encoding T1

(/usr/share/texlive/texmf-dist/tex/latex/base/t1enc.dfu
File: t1enc.dfu 2016/02/28 v1.1s UTF-8 support for inputenc
   defining Unicode char U+00A0 (decimal 160)
   defining Unicode char U+00A1 (decimal 161)
   defining Unicode char U+00A3 (decimal 163)
   defining Unicode char U+00AB (decimal 171)
   defining Unicode char U+00AD (decimal 173)
   defining Unicode char U+00BB (decimal 187)
   defining Unicode char U+00BF (decimal 191)
   defining Unicode char U+00C0 (decimal 192)
   defining Unicode char U+00C1 (decimal 193)
   defining Unicode char U+00C2 (decimal 194)
   defining Unicode char U+00C3 (decimal 195)
   defining Unicode char U+00C4 (decimal 196)
   defining Unicode char U+00C5 (decimal 197)
   defining Unicode char U+00C6 (decimal 198)
   defining Unicode char U+00C7 (decimal 199)
   defining Unicode char U+00C8 (decimal 200)
   defining Unicode char U+00C9 (decimal 201)
   defining Unicode char U+00CA (decimal 202)
   defining Unicode char U+00CB (decimal 203)
   defining Unicode char U+00CC (decimal 204)
   defining Unicode char U+00CD (decimal 205)
   defining Unicode char U+00CE (decimal 206)
   defining Unicode char U+00CF (decimal 207)
   defining Unicode char U+00D0 (decimal 208)
   defining Unicode char U+00D1 (decimal 209)
   defining Unicode char U+00D2 (decimal 210)
   defining Unicode char U+00D3 (decimal 211)
   defining Unicode char U+00D4 (decimal 212)
   defining Unicode char U+00D5 (decimal 213)
   defining Unicode char U+00D6 (decimal 214)
   defining Unicode char U+00D8 (decimal 216)
   defining Unicode char U+00D9 (decimal 217)
   defining Unicode char U+00DA (decimal 218)
   defining Unicode char U+00DB (decimal 219)
   defining Unicode char U+00DC (decimal 220)
   defining Unicode char U+00DD (decimal 221)
   defining Unicode char U+00DE (decimal 222)
   defining Unicode char U+00DF (decimal 223)
   defining Unicode char U+00E0 (decimal 224)
   defining Unicode char U+00E1 (decimal 225)
   defining Unicode char U+00E2 (decimal 226)
   defining Unicode char U+00E3 (decimal 227)
   defining Unicode char U+00E4 (decimal 228)
   defining Unicode char U+00E5 (decimal 229)
   defining Unicode char U+00E6 (decimal 230)
   defining Unicode char U+00E7 (decimal 231)
   defining Unicode char U+00E8 (decimal 232)
   defining Unicode char U+00E9 (decimal 233)
   defining Unicode char U+00EA (decimal 234)
   defining Unicode char U+00EB (decimal 235)
   defining Unicode char U+00EC (decimal 236)
   defining Unicode char U+00ED (decimal 237)
   defining Unicode char U+00EE (decimal 238)
   defining Unicode char U+00EF (decimal 239)
   defining Unicode char U+00F0 (decimal 240)
   defining Unicode char U+00F1 (decimal 241)
   defining Unicode char U+00F2 (decimal 242)
   defining Unicode char U+00F3 (decimal 243)
   defining Unicode char U+00F4 (decimal 244)
   defining Unicode char U+00F5 (decimal 245)
   defining Unicode char U+00F6 (decimal 246)
   defining Unicode char U+00F8 (decimal 248)
   defining Unicode char U+00F9 (decimal 249)
   defining Unicode char U+00FA (decimal 250)
   defining Unicode char U+00FB (decimal 251)
   defining Unicode char U+00FC (decimal 252)
   defining Unicode char U+00FD (decimal 253)
   defining Unicode char U+00FE (decimal 254)
   defining Unicode char U+00FF (decimal 255)
   defining Unicode char U+0100 (decimal 256)
   defining Unicode char U+0101 (decimal 257)
   defining Unicode char U+0102 (decimal 258)
   defining Unicode char U+0103 (decimal 259)
   defining Unicode char U+0104 (decimal 260)
   defining Unicode char U+0105 (decimal 261)
   defining Unicode char U+0106 (decimal 262)
   defining Unicode char U+0107 (decimal 263)
   defining Unicode char U+0108 (decimal 264)
   defining Unicode char U+0109 (decimal 265)
   defining Unicode char U+010A (decimal 266)
   defining Unicode char U+010B (decimal 267)
   defining Unicode char U+010C (decimal 268)
   defining Unicode char U+010D (decimal 269)
   defining Unicode char U+010E (decimal 270)
   defining Unicode char U+010F (decimal 271)
   defining Unicode char U+0110 (decimal 272)
   defining Unicode char U+0111 (decimal 273)
   defining Unicode char U+0112 (decimal 274)
   defining Unicode char U+0113 (decimal 275)
   defining Unicode char U+0114 (decimal 276)
   defining Unicode char U+0115 (decimal 277)
   defining Unicode char U+0116 (decimal 278)
   defining Unicode char U+0117 (decimal 279)
   defining Unicode char U+0118 (decimal 280)
   defining Unicode char U+0119 (decimal 281)
   defining Unicode char U+011A (decimal 282)
   defining Unicode char U+011B (decimal 283)
   defining Unicode char U+011C (decimal 284)
   defining Unicode char U+011D (decimal 285)
   defining Unicode char U+011E (decimal 286)
   defining Unicode char U+011F (decimal 287)
   defining Unicode char U+0120 (decimal 288)
   defining Unicode char U+0121 (decimal 289)
   defining Unicode char U+0122 (decimal 290)
   defining Unicode char U+0123 (decimal 291)
   defining Unicode char U+0124 (decimal 292)
   defining Unicode char U+0125 (decimal 293)
   defining Unicode char U+0128 (decimal 296)
   defining Unicode char U+0129 (decimal 297)
   defining Unicode char U+012A (decimal 298)
   defining Unicode char U+012B (decimal 299)
   defining Unicode char U+012C (decimal 300)
   defining Unicode char U+012D (decimal 301)
   defining Unicode char U+012E (decimal 302)
   defining Unicode char U+012F (decimal 303)
   defining Unicode char U+0130 (decimal 304)
   defining Unicode char U+0131 (decimal 305)
   defining Unicode char U+0132 (decimal 306)
   defining Unicode char U+0133 (decimal 307)
   defining Unicode char U+0134 (decimal 308)
   defining Unicode char U+0135 (decimal 309)
   defining Unicode char U+0136 (decimal 310)
   defining Unicode char U+0137 (decimal 311)
   defining Unicode char U+0139 (decimal 313)
   defining Unicode char U+013A (decimal 314)
   defining Unicode char U+013B (decimal 315)
   defining Unicode char U+013C (decimal 316)
   defining Unicode char U+013D (decimal 317)
   defining Unicode char U+013E (decimal 318)
   defining Unicode char U+0141 (decimal 321)
   defining Unicode char U+0142 (decimal 322)
   defining Unicode char U+0143 (decimal 323)
   defining Unicode char U+0144 (decimal 324)
   defining Unicode char U+0145 (decimal 325)
   defining Unicode char U+0146 (decimal 326)
   defining Unicode char U+0147 (decimal 327)
   defining Unicode char U+0148 (decimal 328)
   defining Unicode char U+014A (decimal 330)
   defining Unicode char U+014B (decimal 331)
   defining Unicode char U+014C (decimal 332)
   defining Unicode char U+014D (decimal 333)
   defining Unicode char U+014E (decimal 334)
   defining Unicode char U+014F (decimal 335)
   defining Unicode char U+0150 (decimal 336)
   defining Unicode char U+0151 (decimal 337)
   defining Unicode char U+0152 (decimal 338)
   defining Unicode char U+0153 (decimal 339)
   defining Unicode char U+0154 (decimal 340)
   defining Unicode char U+0155 (decimal 341)
   defining Unicode char U+0156 (decimal 342)
   defining Unicode char U+0157 (decimal 343)
   defining Unicode char U+0158 (decimal 344)
   defining Unicode char U+0159 (decimal 345)
   defining Unicode char U+015A (decimal 346)
   defining Unicode char U+015B (decimal 347)
   defining Unicode char U+015C (decimal 348)
   defining Unicode char U+015D (decimal 349)
   defining Unicode char U+015E (decimal 350)
   defining Unicode char U+015F (decimal 351)
   defining Unicode char U+0160 (decimal 352)
   defining Unicode char U+0161 (decimal 353)
   defining Unicode char U+0162 (decimal 354)
   defining Unicode char U+0163 (decimal 355)
   defining Unicode char U+0164 (decimal 356)
   defining Unicode char U+0165 (decimal 357)
   defining Unicode char U+0168 (decimal 360)
   defining Unicode char U+0169 (decimal 361)
   defining Unicode char U+016A (decimal 362)
   defining Unicode char U+016B (decimal 363)
   defining Unicode char U+016C (decimal 364)
   defining Unicode char U+016D (decimal 365)
   defining Unicode char U+016E (decimal 366)
   defining Unicode char U+016F (decimal 367)
   defining Unicode char U+0170 (decimal 368)
   defining Unicode char U+0171 (decimal 369)
   defining Unicode char U+0172 (decimal 370)
   defining Unicode char U+0173 (decimal 371)
   defining Unicode char U+0174 (decimal 372)
   defining Unicode char U+0175 (decimal 373)
   defining Unicode char U+0176 (decimal 374)
   defining Unicode char U+0177 (decimal 375)
   defining Unicode char U+0178 (decimal 376)
   defining Unicode char U+0179 (decimal 377)
   defining Unicode char U+017A (decimal 378)
   defining Unicode char U+017B (decimal 379)
   defining Unicode char U+017C (decimal 380)
   defining Unicode char U+017D (decimal 381)
   defining Unicode char U+017E (decimal 382)
   defining Unicode char U+01CD (decimal 461)
   defining Unicode char U+01CE (decimal 462)
   defining Unicode char U+01CF (decimal 463)
   defining Unicode char U+01D0 (decimal 464)
   defining Unicode char U+01D1 (decimal 465)
   defining Unicode char U+01D2 (decimal 466)
   defining Unicode char U+01D3 (decimal 467)
   defining Unicode char U+01D4 (decimal 468)
   defining Unicode char U+01E2 (decimal 482)
   defining Unicode char U+01E3 (decimal 483)
   defining Unicode char U+01E6 (decimal 486)
   defining Unicode char U+01E7 (decimal 487)
   defining Unicode char U+01E8 (decimal 488)
   defining Unicode char U+01E9 (decimal 489)
   defining Unicode char U+01EA (decimal 490)
   defining Unicode char U+01EB (decimal 491)
   defining Unicode char U+01F0 (decimal 496)
   defining Unicode char U+01F4 (decimal 500)
   defining Unicode char U+01F5 (decimal 501)
   defining Unicode char U+0218 (decimal 536)
   defining Unicode char U+0219 (decimal 537)
   defining Unicode char U+021A (decimal 538)
   defining Unicode char U+021B (decimal 539)
   defining Unicode char U+1E02 (decimal 7682)
   defining Unicode char U+1E03 (decimal 7683)
   defining Unicode char U+200C (decimal 8204)
   defining Unicode char U+2010 (decimal 8208)
   defining Unicode char U+2011 (decimal 8209)
   defining Unicode char U+2012 (decimal 8210)
   defining Unicode char U+2013 (decimal 8211)
   defining Unicode char U+2014 (decimal 8212)
   defining Unicode char U+2015 (decimal 8213)
   defining Unicode char U+2018 (decimal 8216)
   defining Unicode char U+2019 (decimal 8217)
   defining Unicode char U+201A (decimal 8218)
   defining Unicode char U+201C (decimal 8220)
   defining Unicode char U+201D (decimal 8221)
   defining Unicode char U+201E (decimal 8222)
   defining Unicode char U+2030 (decimal 8240)
   defining Unicode char U+2031 (decimal 8241)
   defining Unicode char U+2039 (decimal 8249)
   defining Unicode char U+203A (decimal 8250)
   defining Unicode char U+2423 (decimal 9251)
)
Now handling font encoding OT1 ...
... processing UTF-8 mapping file for font encoding OT1

(/usr/share/texlive/texmf-dist/tex/latex/base/ot1enc.dfu
File: ot1enc.dfu 2016/02/28 v1.1s UTF-8 support for inputenc
   defining Unicode char U+00A0 (decimal 160)
   defining Unicode char U+00A1 (decimal 161)
   defining Unicode char U+00A3 (decimal 163)
   defining Unicode char U+00AD (decimal 173)
   defining Unicode char U+00B8 (decimal 184)
   defining Unicode char U+00BF (decimal 191)
   defining Unicode char U+00C5 (decimal 197)
   defining Unicode char U+00C6 (decimal 198)
   defining Unicode char U+00D8 (decimal 216)
   defining Unicode char U+00DF (decimal 223)
   defining Unicode char U+00E6 (decimal 230)
   defining Unicode char U+00EC (decimal 236)
   defining Unicode char U+00ED (decimal 237)
   defining Unicode char U+00EE (decimal 238)
   defining Unicode char U+00EF (decimal 239)
   defining Unicode char U+00F8 (decimal 248)
   defining Unicode char U+0131 (decimal 305)
   defining Unicode char U+0141 (decimal 321)
   defining Unicode char U+0142 (decimal 322)
   defining Unicode char U+0152 (decimal 338)
   defining Unicode char U+0153 (decimal 339)
   defining Unicode char U+0174 (decimal 372)
   defining Unicode char U+0175 (decimal 373)
   defining Unicode char U+0176 (decimal 374)
   defining Unicode char U+0177 (decimal 375)
   defining Unicode char U+0218 (decimal 536)
   defining Unicode char U+0219 (decimal 537)
   defining Unicode char U+021A (decimal 538)
   defining Unicode char U+021B (decimal 539)
   defining Unicode char U+2013 (decimal 8211)
   defining Unicode char U+2014 (decimal 8212)
   defining Unicode char U+2018 (decimal 8216)
   defining Unicode char U+2019 (decimal 8217)
   defining Unicode char U+201C (decimal 8220)
   defining Unicode char U+201D (decimal 8221)
)
Now handling font encoding OMS ...
... processing UTF-8 mapping file for font encoding OMS

(/usr/share/texlive/texmf-dist/tex/latex/base/omsenc.dfu
File: omsenc.dfu 2016/02/28 v1.1s UTF-8 support for inputenc
   defining Unicode char U+00A7 (decimal 167)
   defining Unicode char U+00B6 (decimal 182)
   defining Unicode char U+00B7 (decimal 183)
   defining Unicode char U+2020 (decimal 8224)
   defining Unicode char U+2021 (decimal 8225)
   defining Unicode char U+2022 (decimal 8226)
)
Now handling font encoding OMX ...
... no UTF-8 mapping file for font encoding OMX
Now handling font encoding U ...
... no UTF-8 mapping file for font encoding U
Now handling font encoding TS1 ...
... processing UTF-8 mapping file for font encoding TS1

(/usr/share/texlive/texmf-dist/tex/latex/base/ts1enc.dfu
File: ts1enc.dfu 2016/02/28 v1.1s UTF-8 support for inputenc
   defining Unicode char U+00A2 (decimal 162)
   defining Unicode char U+00A3 (decimal 163)
   defining Unicode char U+00A4 (decimal 164)
   defining Unicode char U+00A5 (decimal 165)
   defining Unicode char U+00A6 (decimal 166)
   defining Unicode char U+00A7 (decimal 167)
   defining Unicode char U+00A8 (decimal 168)
   defining Unicode char U+00A9 (decimal 169)
   defining Unicode char U+00AA (decimal 170)
   defining Unicode char U+00AC (decimal 172)
   defining Unicode char U+00AE (decimal 174)
   defining Unicode char U+00AF (decimal 175)
   defining Unicode char U+00B0 (decimal 176)
   defining Unicode char U+00B1 (decimal 177)
   defining Unicode char U+00B2 (decimal 178)
   defining Unicode char U+00B3 (decimal 179)
   defining Unicode char U+00B4 (decimal 180)
   defining Unicode char U+00B5 (decimal 181)
   defining Unicode char U+00B6 (decimal 182)
   defining Unicode char U+00B7 (decimal 183)
   defining Unicode char U+00B9 (decimal 185)
   defining Unicode char U+00BA (decimal 186)
   defining Unicode char U+00BC (decimal 188)
   defining Unicode char U+00BD (decimal 189)
   defining Unicode char U+00BE (decimal 190)
   defining Unicode char U+00D7 (decimal 215)
   defining Unicode char U+00F7 (decimal 247)
   defining Unicode char U+0192 (decimal 402)
   defining Unicode char U+02C7 (decimal 711)
   defining Unicode char U+02D8 (decimal 728)
   defining Unicode char U+02DD (decimal 733)
   defining Unicode char U+0E3F (decimal 3647)
   defining Unicode char U+2016 (decimal 8214)
   defining Unicode char U+2020 (decimal 8224)
   defining Unicode char U+2021 (decimal 8225)
   defining Unicode char U+2022 (decimal 8226)
   defining Unicode char U+2030 (decimal 8240)
   defining Unicode char U+2031 (decimal 8241)
   defining Unicode char U+203B (decimal 8251)
   defining Unicode char U+203D (decimal 8253)
   defining Unicode char U+2044 (decimal 8260)
   defining Unicode char U+204E (decimal 8270)
   defining Unicode char U+2052 (decimal 8274)
   defining Unicode char U+20A1 (decimal 8353)
   defining Unicode char U+20A4 (decimal 8356)
   defining Unicode char U+20A6 (decimal 8358)
   defining Unicode char U+20A9 (decimal 8361)
   defining Unicode char U+20AB (decimal 8363)
   defining Unicode char U+20AC (decimal 8364)
   defining Unicode char U+20B1 (decimal 8369)
   defining Unicode char U+2103 (decimal 8451)
   defining Unicode char U+2116 (decimal 8470)
   defining Unicode char U+2117 (decimal 8471)
   defining Unicode char U+211E (decimal 8478)
   defining Unicode char U+2120 (decimal 8480)
   defining Unicode char U+2122 (decimal 8482)
   defining Unicode char U+2126 (decimal 8486)
   defining Unicode char U+2127 (decimal 8487)
   defining Unicode char U+212E (decimal 8494)
   defining Unicode char U+2190 (decimal 8592)
   defining Unicode char U+2191 (decimal 8593)
   defining Unicode char U+2192 (decimal 8594)
   defining Unicode char U+2193 (decimal 8595)
   defining Unicode char U+2329 (decimal 9001)
   defining Unicode char U+232A (decimal 9002)
   defining Unicode char U+2422 (decimal 9250)
   defining Unicode char U+25E6 (decimal 9702)
   defining Unicode char U+25EF (decimal 9711)
   defining Unicode char U+266A (decimal 9834)
)
   defining Unicode char U+00A9 (decimal 169)
   defining Unicode char U+00AA (decimal 170)
   defining Unicode char U+00AE (decimal 174)
   defining Unicode char U+00BA (decimal 186)
   defining Unicode char U+02C6 (decimal 710)
   defining Unicode char U+02DC (decimal 732)
   defining Unicode char U+200C (decimal 8204)
   defining Unicode char U+2026 (decimal 8230)
   defining Unicode char U+2122 (decimal 8482)
   defining Unicode char U+2423 (decimal 9251)
))
   defining Unicode char U+394 (decimal 916)
   defining Unicode char U+8710 (decimal 34576)

(/usr/share/texlive/texmf-dist/tex/generic/babel/babel.sty
Package: babel 2016/04/23 3.9r The Babel package

(/usr/share/texlive/texmf-dist/tex/generic/babel-english/english.ldf
Language: english 2012/08/20 v3.3p English support from the babel system

(/usr/share/texlive/texmf-dist/tex/generic/babel/babel.def
File: babel.def 2016/04/23 3.9r Babel common definitions
\babel@savecnt=\count87
\U@D=\dimen105
)
\l@canadian = a dialect from \language\l@american 
\l@australian = a dialect from \language\l@british 
\l@newzealand = a dialect from \language\l@british 
))
(/usr/share/texlive/texmf-dist/tex/latex/tools/array.sty
Package: array 2014/10/28 v2.4c Tabular extension package (FMi)
\col@sep=\dimen106
\extrarowheight=\dimen107
\NC@list=\toks16
\extratabsurround=\skip45
\backup@length=\skip46
)
(/usr/share/texlive/texmf-dist/tex/latex/tools/tabularx.sty
Package: tabularx 2016/02/03 v2.11 `tabularx' package (DPC)
\TX@col@width=\dimen108
\TX@old@table=\dimen109
\TX@old@col=\dimen110
\TX@target=\dimen111
\TX@delta=\dimen112
\TX@cols=\count88
\TX@ftn=\toks17
)
(/usr/share/texlive/texmf-dist/tex/latex/graphics/graphicx.sty
Package: graphicx 2014/10/28 v1.0g Enhanced LaTeX Graphics (DPC,SPQR)

(/usr/share/texlive/texmf-dist/tex/latex/graphics/keyval.sty
Package: keyval 2014/10/28 v1.15 key=value parser (DPC)
\KV@toks@=\toks18
)
(/usr/share/texlive/texmf-dist/tex/latex/graphics/graphics.sty
Package: graphics 2016/07/10 v1.0t Standard LaTeX Graphics (DPC,SPQR)

(/usr/share/texlive/texmf-dist/tex/latex/graphics/trig.sty
Package: trig 2016/01/03 v1.10 sin cos tan (DPC)
)
(/usr/share/texlive/texmf-dist/tex/latex/graphics-cfg/graphics.cfg
File: graphics.cfg 2016/06/04 v1.11 sample graphics configuration
)
Package graphics Info: Driver file: pdftex.def on input line 99.

(/usr/share/texlive/texmf-dist/tex/latex/graphics-def/pdftex.def
File: pdftex.def 2016/07/10 v0.06j Graphics/color for pdfTeX

(/usr/share/texlive/texmf-dist/tex/generic/oberdiek/infwarerr.sty
Package: infwarerr 2016/05/16 v1.4 Providing info/warning/error messages (HO)
)
(/usr/share/texlive/texmf-dist/tex/generic/oberdiek/ltxcmds.sty
Package: ltxcmds 2016/05/16 v1.23 LaTeX kernel commands for general use (HO)
)
\Gread@gobject=\count89
))
\Gin@req@height=\dimen113
\Gin@req@width=\dimen114
)
(/usr/share/texlive/texmf-dist/tex/latex/graphics/color.sty
Package: color 2016/07/10 v1.1e Standard LaTeX Color (DPC)

(/usr/share/texlive/texmf-dist/tex/latex/graphics-cfg/color.cfg
File: color.cfg 2016/01/02 v1.6 sample color configuration
)
Package color Info: Driver file: pdftex.def on input line 147.
)
(/usr/share/texlive/texmf-dist/tex/latex/amsfonts/amssymb.sty
Package: amssymb 2013/01/14 v3.01 AMS font symbols

(/usr/share/texlive/texmf-dist/tex/latex/amsfonts/amsfonts.sty
Package: amsfonts 2013/01/14 v3.01 Basic AMSFonts support
\@emptytoks=\toks19
\symAMSa=\mathgroup4
\symAMSb=\mathgroup5
LaTeX Font Info:    Overwriting math alphabet `\mathfrak' in version `bold'
(Font)                  U/euf/m/n --> U/euf/b/n on input line 106.
))
(/usr/share/texlive/texmf-dist/tex/latex/amsmath/amsmath.sty
Package: amsmath 2016/06/28 v2.15d AMS math features
\@mathmargin=\skip47

For additional information on amsmath, use the `?' option.
(/usr/share/texlive/texmf-dist/tex/latex/amsmath/amstext.sty
Package: amstext 2000/06/29 v2.01 AMS text

(/usr/share/texlive/texmf-dist/tex/latex/amsmath/amsgen.sty
File: amsgen.sty 1999/11/30 v2.0 generic functions
\@emptytoks=\toks20
\ex@=\dimen115
))
(/usr/share/texlive/texmf-dist/tex/latex/amsmath/amsbsy.sty
Package: amsbsy 1999/11/29 v1.2d Bold Symbols
\pmbraise@=\dimen116
)
(/usr/share/texlive/texmf-dist/tex/latex/amsmath/amsopn.sty
Package: amsopn 2016/03/08 v2.02 operator names
)
\inf@bad=\count90
LaTeX Info: Redefining \frac on input line 199.
\uproot@=\count91
\leftroot@=\count92
LaTeX Info: Redefining \overline on input line 297.
\classnum@=\count93
\DOTSCASE@=\count94
LaTeX Info: Redefining \ldots on input line 394.
LaTeX Info: Redefining \dots on input line 397.
LaTeX Info: Redefining \cdots on input line 518.
\Mathstrutbox@=\box27
\strutbox@=\box28
\big@size=\dimen117
LaTeX Font Info:    Redeclaring font encoding OML on input line 634.
LaTeX Font Info:    Redeclaring font encoding OMS on input line 635.
\macc@depth=\count95
\c@MaxMatrixCols=\count96
\dotsspace@=\muskip10
\c@parentequation=\count97
\dspbrk@lvl=\count98
\tag@help=\toks21
\row@=\count99
\column@=\count100
\maxfields@=\count101
\andhelp@=\toks22
\eqnshift@=\dimen118
\alignsep@=\dimen119
\tagshift@=\dimen120
\tagwidth@=\dimen121
\totwidth@=\dimen122
\lineht@=\dimen123
\@envbody=\toks23
\multlinegap=\skip48
\multlinetaggap=\skip49
\mathdisplay@stack=\toks24
LaTeX Info: Redefining \[ on input line 2739.
LaTeX Info: Redefining \] on input line 2740.
)
(/usr/share/texlive/texmf-dist/tex/latex/amscls/amsthm.sty
Package: amsthm 2015/03/04 v2.20.2
\thm@style=\toks25
\thm@bodyfont=\toks26
\thm@headfont=\toks27
\thm@notefont=\toks28
\thm@headpunct=\toks29
\thm@preskip=\skip50
\thm@postskip=\skip51
\thm@headsep=\skip52
\dth@everypar=\toks30
)
\affilsep=\skip53
\@affilsep=\skip54
\c@Maxaffil=\count102
\c@authors=\count103
\c@affil=\count104

(/usr/share/texlive/texmf-dist/tex/latex/url/url.sty
\Urlmuskip=\muskip11
Package: url 2013/09/16  ver 3.4  Verb mode for urls, etc.
)
(/usr/share/texlive/texmf-dist/tex/latex/bezos/accents.sty
Package: accents 2006/05/12 v1.3 Math Accent Tools
\cc@skew=\dimen124
\cc@wd=\dimen125
\cc@code=\count105
\cc@group=\count106
\cc@skewchar=\count107
)
(/usr/share/texlive/texmf-dist/tex/latex/cancel/cancel.sty
Package: cancel 2013/04/12 v2.2 Cancel math terms
)
(/usr/share/texlive/texmf-dist/tex/latex/multirow/multirow.sty
\bigstrutjot=\dimen126
)
(/usr/share/texlive/texmf-dist/tex/latex/supertabular/supertabular.sty
Package: supertabular 2004/02/20 v4.1e the supertabular environment
\c@tracingst=\count108
\ST@wd=\dimen127
\ST@rightskip=\skip55
\ST@leftskip=\skip56
\ST@parfillskip=\skip57
\ST@pageleft=\dimen128
\ST@headht=\dimen129
\ST@tailht=\dimen130
\ST@pagesofar=\dimen131
\ST@pboxht=\dimen132
\ST@lineht=\dimen133
\ST@stretchht=\dimen134
\ST@prevht=\dimen135
\ST@toadd=\dimen136
\ST@dimen=\dimen137
\ST@pbox=\box29
)
(/usr/share/texlive/texmf-dist/tex/latex/algorithms/algorithmic.sty
Package: algorithmic 2009/08/24 v0.1 Document Style `algorithmic'

(/usr/share/texlive/texmf-dist/tex/latex/base/ifthen.sty
Package: ifthen 2014/09/29 v1.1c Standard LaTeX ifthen package (DPC)
)
\c@ALC@unique=\count109
\c@ALC@line=\count110
\c@ALC@rem=\count111
\c@ALC@depth=\count112
\ALC@tlm=\skip58
\algorithmicindent=\skip59
)
(/usr/share/texlive/texmf-dist/tex/latex/algorithms/algorithm.sty
Package: algorithm 2009/08/24 v0.1 Document Style `algorithm' - floating enviro
nment

(/usr/share/texlive/texmf-dist/tex/latex/float/float.sty
Package: float 2001/11/08 v1.3d Float enhancements (AL)
\c@float@type=\count113
\float@exts=\toks31
\float@box=\box30
\@float@everytoks=\toks32
\@floatcapt=\box31
)
\@float@every@algorithm=\toks33
\c@algorithm=\count114
)
(/usr/share/texlive/texmf-dist/tex/latex/caption/caption.sty
Package: caption 2016/02/21 v3.3-144 Customizing captions (AR)

(/usr/share/texlive/texmf-dist/tex/latex/caption/caption3.sty
Package: caption3 2016/05/22 v1.7-166 caption3 kernel (AR)
Package caption3 Info: TeX engine: e-TeX on input line 67.
\captionmargin=\dimen138
\captionmargin@=\dimen139
\captionwidth=\dimen140
\caption@tempdima=\dimen141
\caption@indent=\dimen142
\caption@parindent=\dimen143
\caption@hangindent=\dimen144
Package caption Info: Unknown document class (or package),
(caption)             standard defaults will be used.
)

Package caption Warning: Unsupported document class (or package) detected,
(caption)                usage of the caption package is not recommended.
See the caption package documentation for explanation.

Package caption Info: \@makecaption = \long macro:#1#2->\def \@tempa {figure}\i
fx \@captype \@tempa \if@stage@final \vskip 0.7\abovecaptionskip \else \vskip \
abovecaptionskip \goodbreak \fi \fi {\reset@font \small {\bfseries #1.} #2\par 
}\if@cop@home \ifonline \ifnum \csname c@\@captype \endcsname =1 \immediate \wr
ite \@auxout {\string \gdef \string \@num \@captype {}}\hypertarget {\@captype 
}{}\fi \fi \fi \def \@tempa {table}\ifx \@captype \@tempa \vskip \abovecaptions
kip \if@stage@final \else \goodbreak \fi \fi .
\c@ContinuedFloat=\count115
Package caption Info: float package is loaded.
Package caption Info: supertabular package is loaded.
) (/usr/share/texlive/texmf-dist/tex/latex/subfloat/subfloat.sty
Package: subfloat 2003/08/21 version 2.14

Package `subfloat', Version 2.14 of 2003/08/21.

Package subfloat Warning: Numbers of floats not counted:
(subfloat)                If you use one of the counters subfloatfiguremax or
(subfloat)                subfloattablemax you will get strange error messages
(subfloat)                containing \c@subfloatfiguremax or
(subfloat)                \c@subfloattablemax:
(subfloat)                Please switch on countmax or remove the code using
(subfloat)                the counter then..

) (./natbib.sty
Package: natbib 2006/09/06 7.4a (PWD)
\bibhang=\skip60
\bibsep=\skip61
LaTeX Info: Redefining \cite on input line 541.
\c@NAT@ctr=\count116
) (/usr/share/texlive/texmf-dist/tex/latex/graphics/rotating.sty
Package: rotating 2016/05/22 v2.16c rotated objects in LaTeX
\c@r@tfl@t=\count117
\rotFPtop=\skip62
\rotFPbot=\skip63
\rot@float@box=\box32
\rot@mess@toks=\toks34
) (/usr/share/texlive/texmf-dist/tex/latex/lineno/lineno.sty
Package: lineno 2005/11/02 line numbers on paragraphs v4.41
\linenopenalty=\count118
\output=\toks35
\linenoprevgraf=\count119
\linenumbersep=\dimen145
\linenumberwidth=\dimen146
\c@linenumber=\count120
\c@pagewiselinenumber=\count121
\c@LN@truepage=\count122
\c@internallinenumber=\count123
\c@internallinenumbers=\count124
\quotelinenumbersep=\dimen147
\bframerule=\dimen148
\bframesep=\dimen149
\bframebox=\box33
LaTeX Info: Redefining \\ on input line 3056.
)
(/usr/share/texlive/texmf-dist/tex/latex/psnfss/times.sty
Package: times 2005/04/12 PSNFSS-v9.2a (SPQR) 
)
(/usr/share/texlive/texmf-dist/tex/latex/psnfss/pifont.sty
Package: pifont 2005/04/12 PSNFSS-v9.2a Pi font support (SPQR) 
LaTeX Font Info:    Try loading font information for U+pzd on input line 63.

(/usr/share/texlive/texmf-dist/tex/latex/psnfss/upzd.fd
File: upzd.fd 2001/06/04 font definitions for U/pzd.
)
LaTeX Font Info:    Try loading font information for U+psy on input line 64.

(/usr/share/texlive/texmf-dist/tex/latex/psnfss/upsy.fd
File: upsy.fd 2001/06/04 font definitions for U/psy.
))
(/usr/share/texlive/texmf-dist/tex/latex/hyperref/hyperref.sty
Package: hyperref 2016/06/24 v6.83q Hypertext links for LaTeX

(/usr/share/texlive/texmf-dist/tex/generic/oberdiek/hobsub-hyperref.sty
Package: hobsub-hyperref 2016/05/16 v1.14 Bundle oberdiek, subset hyperref (HO)


(/usr/share/texlive/texmf-dist/tex/generic/oberdiek/hobsub-generic.sty
Package: hobsub-generic 2016/05/16 v1.14 Bundle oberdiek, subset generic (HO)
Package: hobsub 2016/05/16 v1.14 Construct package bundles (HO)
Package hobsub Info: Skipping package `infwarerr' (already loaded).
Package hobsub Info: Skipping package `ltxcmds' (already loaded).
Package: ifluatex 2016/05/16 v1.4 Provides the ifluatex switch (HO)
Package ifluatex Info: LuaTeX not detected.
Package: ifvtex 2016/05/16 v1.6 Detect VTeX and its facilities (HO)
Package ifvtex Info: VTeX not detected.
Package: intcalc 2016/05/16 v1.2 Expandable calculations with integers (HO)
Package: ifpdf 2016/05/14 v3.1 Provides the ifpdf switch
Package: etexcmds 2016/05/16 v1.6 Avoid name clashes with e-TeX commands (HO)
Package etexcmds Info: Could not find \expanded.
(etexcmds)             That can mean that you are not using pdfTeX 1.50 or
(etexcmds)             that some package has redefined \expanded.
(etexcmds)             In the latter case, load this package earlier.
Package: kvsetkeys 2016/05/16 v1.17 Key value parser (HO)
Package: kvdefinekeys 2016/05/16 v1.4 Define keys (HO)
Package: pdftexcmds 2016/05/21 v0.22 Utility functions of pdfTeX for LuaTeX (HO
)
Package pdftexcmds Info: LuaTeX not detected.
Package pdftexcmds Info: \pdf@primitive is available.
Package pdftexcmds Info: \pdf@ifprimitive is available.
Package pdftexcmds Info: \pdfdraftmode found.
Package: pdfescape 2016/05/16 v1.14 Implements pdfTeX's escape features (HO)
Package: bigintcalc 2016/05/16 v1.4 Expandable calculations on big integers (HO
)
Package: bitset 2016/05/16 v1.2 Handle bit-vector datatype (HO)
Package: uniquecounter 2016/05/16 v1.3 Provide unlimited unique counter (HO)
)
Package hobsub Info: Skipping package `hobsub' (already loaded).
Package: letltxmacro 2016/05/16 v1.5 Let assignment for LaTeX macros (HO)
Package: hopatch 2016/05/16 v1.3 Wrapper for package hooks (HO)
Package: xcolor-patch 2016/05/16 xcolor patch
Package: atveryend 2016/05/16 v1.9 Hooks at the very end of document (HO)
Package atveryend Info: \enddocument detected (standard20110627).
Package: atbegshi 2016/06/09 v1.18 At begin shipout hook (HO)
Package: refcount 2016/05/16 v3.5 Data extraction from label references (HO)
Package: hycolor 2016/05/16 v1.8 Color options for hyperref/bookmark (HO)
)
(/usr/share/texlive/texmf-dist/tex/generic/ifxetex/ifxetex.sty
Package: ifxetex 2010/09/12 v0.6 Provides ifxetex conditional
)
(/usr/share/texlive/texmf-dist/tex/latex/oberdiek/auxhook.sty
Package: auxhook 2016/05/16 v1.4 Hooks for auxiliary files (HO)
)
(/usr/share/texlive/texmf-dist/tex/latex/oberdiek/kvoptions.sty
Package: kvoptions 2016/05/16 v3.12 Key value format for package options (HO)
)
\@linkdim=\dimen150
\Hy@linkcounter=\count125
\Hy@pagecounter=\count126

(/usr/share/texlive/texmf-dist/tex/latex/hyperref/pd1enc.def
File: pd1enc.def 2016/06/24 v6.83q Hyperref: PDFDocEncoding definition (HO)
Now handling font encoding PD1 ...
... no UTF-8 mapping file for font encoding PD1
)
\Hy@SavedSpaceFactor=\count127

(/usr/share/texlive/texmf-dist/tex/latex/latexconfig/hyperref.cfg
File: hyperref.cfg 2002/06/06 v1.2 hyperref configuration of TeXLive
)
Package hyperref Info: Option `bookmarks' set `false' on input line 4362.
Package hyperref Info: Hyper figures OFF on input line 4486.
Package hyperref Info: Link nesting OFF on input line 4491.
Package hyperref Info: Hyper index ON on input line 4494.
Package hyperref Info: Plain pages OFF on input line 4501.
Package hyperref Info: Backreferencing OFF on input line 4506.
Package hyperref Info: Implicit mode ON; LaTeX internals redefined.
Package hyperref Info: Bookmarks OFF on input line 4741.
\c@Hy@tempcnt=\count128
LaTeX Info: Redefining \url on input line 5088.
\XeTeXLinkMargin=\dimen151
\Fld@menulength=\count129
\Field@Width=\dimen152
\Fld@charsize=\dimen153
Package hyperref Info: Hyper figures OFF on input line 6342.
Package hyperref Info: Link nesting OFF on input line 6347.
Package hyperref Info: Hyper index ON on input line 6350.
Package hyperref Info: backreferencing OFF on input line 6357.
Package hyperref Info: Link coloring OFF on input line 6362.
Package hyperref Info: Link coloring with OCG OFF on input line 6367.
Package hyperref Info: PDF/A mode OFF on input line 6372.
LaTeX Info: Redefining \ref on input line 6412.
LaTeX Info: Redefining \pageref on input line 6416.
\Hy@abspage=\count130
\c@Item=\count131
\c@Hfootnote=\count132
)

Package hyperref Message: Driver (autodetected): hpdftex.

(/usr/share/texlive/texmf-dist/tex/latex/hyperref/hpdftex.def
File: hpdftex.def 2016/06/24 v6.83q Hyperref driver for pdfTeX
\Fld@listcount=\count133
\c@bookmark@seq@number=\count134

(/usr/share/texlive/texmf-dist/tex/latex/oberdiek/rerunfilecheck.sty
Package: rerunfilecheck 2016/05/16 v1.8 Rerun checks for auxiliary files (HO)
Package uniquecounter Info: New unique counter `rerunfilecheck' on input line 2
82.
)
\Hy@SectionHShift=\skip64
)
\c@reaction=\count135
\tabularwidth=\dimen154
Package color Info: Redefining color bgcol on input line 2252.
Package color Info: Redefining color textcol on input line 2256.
Package color Info: Redefining color bgcol on input line 2257.
Package color Info: Redefining color barcol on input line 2258.
)
LaTeX Info: Redefining \vec on input line 76.

(/usr/share/texlive/texmf-dist/tex/latex/sidecap/sidecap.sty
Package: sidecap 2003/06/06 v1.6f SideCap Package (RN/HjG)
\SC@BOXWD=\dimen155
\SC@CAPWD=\dimen156
\SC@tempdima=\dimen157
\SC@tempdimb=\dimen158
\c@SC@C=\count136
\SC@BOX=\box34
)
(/usr/share/texlive/texmf-dist/tex/latex/subfigure/subfigure.sty
Package: subfigure 2002/03/15 v2.1.5 subfigure package
\subfigtopskip=\skip65
\subfigcapskip=\skip66
\subfigcaptopadj=\dimen159
\subfigbottomskip=\skip67
\subfigcapmargin=\dimen160
\subfiglabelskip=\skip68
\c@subfigure=\count137
\c@lofdepth=\count138
\c@subtable=\count139
\c@lotdepth=\count140

****************************************
* Local config file subfigure.cfg used *
****************************************
(/usr/share/texlive/texmf-dist/tex/latex/subfigure/subfigure.cfg)
\subfig@top=\skip69
\subfig@bottom=\skip70
)
(/usr/share/texlive/texmf-dist/tex/latex/xcolor/xcolor.sty
Package: xcolor 2016/05/11 v2.12 LaTeX color extensions (UK)

(/usr/share/texlive/texmf-dist/tex/latex/graphics-cfg/color.cfg
File: color.cfg 2016/01/02 v1.6 sample color configuration
)
Package xcolor Info: Driver file: pdftex.def on input line 225.

(/usr/share/texlive/texmf-dist/tex/latex/colortbl/colortbl.sty
Package: colortbl 2012/02/13 v1.0a Color table columns (DPC)
\everycr=\toks36
\minrowclearance=\skip71
)
LaTeX Info: Redefining \color on input line 709.
\rownum=\count141
Package xcolor Info: Model `cmy' substituted by `cmy0' on input line 1348.
Package xcolor Info: Model `hsb' substituted by `rgb' on input line 1352.
Package xcolor Info: Model `RGB' extended on input line 1364.
Package xcolor Info: Model `HTML' substituted by `rgb' on input line 1366.
Package xcolor Info: Model `Hsb' substituted by `hsb' on input line 1367.
Package xcolor Info: Model `tHsb' substituted by `hsb' on input line 1368.
Package xcolor Info: Model `HSB' substituted by `hsb' on input line 1369.
Package xcolor Info: Model `Gray' substituted by `gray' on input line 1370.
Package xcolor Info: Model `wave' substituted by `hsb' on input line 1371.
)
(./slashbox.sty
slashbox style by K.Yasuoka, May 1993.
\@slashboxa=\box35
\@slashboxb=\box36
\@slashboxc=\box37
\@slashboxwd=\count142
\@slashboxht=\count143
\@slashsepl=\dimen161
\@slashsepr=\dimen162
) (/usr/share/texlive/texmf-dist/tex/latex/tools/multicol.sty
Package: multicol 2016/04/07 v1.8p multicolumn formatting (FMi)
\c@tracingmulticols=\count144
\mult@box=\box38
\multicol@leftmargin=\dimen163
\c@unbalance=\count145
\c@collectmore=\count146
\doublecol@number=\count147
\multicoltolerance=\count148
\multicolpretolerance=\count149
\full@width=\dimen164
\page@free=\dimen165
\premulticols=\dimen166
\postmulticols=\dimen167
\multicolsep=\skip72
\multicolbaselineskip=\skip73
\partial@page=\box39
\last@line=\box40
\maxbalancingoverflow=\dimen168
\mult@rightbox=\box41
\mult@grightbox=\box42
\mult@gfirstbox=\box43
\mult@firstbox=\box44
\@tempa=\box45
\@tempa=\box46
\@tempa=\box47
\@tempa=\box48
\@tempa=\box49
\@tempa=\box50
\@tempa=\box51
\@tempa=\box52
\@tempa=\box53
\@tempa=\box54
\@tempa=\box55
\@tempa=\box56
\@tempa=\box57
\@tempa=\box58
\@tempa=\box59
\@tempa=\box60
\@tempa=\box61
\c@columnbadness=\count150
\c@finalcolumnbadness=\count151
\last@try=\dimen169
\multicolovershoot=\dimen170
\multicolundershoot=\dimen171
\mult@nat@firstbox=\box62
\colbreak@box=\box63
\mc@col@check@num=\count152
)
(/usr/share/texlive/texmf-dist/tex/latex/makecell/makecell.sty
Package: makecell 2009/08/03 V0.1e Managing of Tab Column Heads and Cells
\rotheadsize=\dimen172
\c@nlinenum=\count153
\TeXr@lab=\toks37
)
(/usr/share/texlive/texmf-dist/tex/latex/chngcntr/chngcntr.sty
Package: chngcntr 2009/09/02 v1.0a change counter resetting
)
(/usr/share/texlive/texmf-dist/tex/generic/ulem/ulem.sty
\UL@box=\box64
\UL@hyphenbox=\box65
\UL@skip=\skip74
\UL@hook=\toks38
\UL@height=\dimen173
\UL@pe=\count154
\UL@pixel=\dimen174
\ULC@box=\box66
Package: ulem 2012/05/18
\ULdepth=\dimen175
)
(/usr/share/texlive/texmf-dist/tex/latex/oberdiek/settobox.sty
Package: settobox 2016/05/16 v1.5 Assign box dimensions to length registers (HO
)
)
\DIFdelgraphicsbox=\box67
\DIFdelgraphicswidth=\skip75
\DIFdelgraphicsheight=\skip76
LaTeX Info: Redefining \DIFaddbegin on input line 150.
LaTeX Info: Redefining \DIFaddend on input line 151.
LaTeX Info: Redefining \DIFdelbegin on input line 152.
LaTeX Info: Redefining \DIFdelend on input line 153.
LaTeX Info: Redefining \DIFaddbeginFL on input line 158.
LaTeX Info: Redefining \DIFaddendFL on input line 159.
LaTeX Info: Redefining \DIFdelbeginFL on input line 160.
LaTeX Info: Redefining \DIFdelendFL on input line 161.
 (./template.aux)
\openout1 = `template.aux'.

LaTeX Font Info:    Checking defaults for OML/cmm/m/it on input line 164.
LaTeX Font Info:    ... okay on input line 164.
LaTeX Font Info:    Checking defaults for T1/cmr/m/n on input line 164.
LaTeX Font Info:    ... okay on input line 164.
LaTeX Font Info:    Checking defaults for OT1/cmr/m/n on input line 164.
LaTeX Font Info:    ... okay on input line 164.
LaTeX Font Info:    Checking defaults for OMS/cmsy/m/n on input line 164.
LaTeX Font Info:    ... okay on input line 164.
LaTeX Font Info:    Checking defaults for OMX/cmex/m/n on input line 164.
LaTeX Font Info:    ... okay on input line 164.
LaTeX Font Info:    Checking defaults for U/cmr/m/n on input line 164.
LaTeX Font Info:    ... okay on input line 164.
LaTeX Font Info:    Checking defaults for TS1/cmr/m/n on input line 164.
LaTeX Font Info:    Try loading font information for TS1+cmr on input line 164.

 (/usr/share/texlive/texmf-dist/tex/latex/base/ts1cmr.fd
File: ts1cmr.fd 2014/09/29 v2.5h Standard LaTeX font definitions
)
LaTeX Font Info:    ... okay on input line 164.
LaTeX Font Info:    Checking defaults for PD1/pdf/m/n on input line 164.
LaTeX Font Info:    ... okay on input line 164.
LaTeX Font Info:    Try loading font information for T1+ptm on input line 164.

(/usr/share/texlive/texmf-dist/tex/latex/psnfss/t1ptm.fd
File: t1ptm.fd 2001/06/04 font definitions for T1/ptm.
)
(/usr/share/texlive/texmf-dist/tex/context/base/mkii/supp-pdf.mkii
[Loading MPS to PDF converter (version 2006.09.02).]
\scratchcounter=\count155
\scratchdimen=\dimen176
\scratchbox=\box68
\nofMPsegments=\count156
\nofMParguments=\count157
\everyMPshowfont=\toks39
\MPscratchCnt=\count158
\MPscratchDim=\dimen177
\MPnumerator=\count159
\makeMPintoPDFobject=\count160
\everyMPtoPDFconversion=\toks40
) (/usr/share/texlive/texmf-dist/tex/latex/oberdiek/epstopdf-base.sty
Package: epstopdf-base 2016/05/15 v2.6 Base part for package epstopdf

(/usr/share/texlive/texmf-dist/tex/latex/oberdiek/grfext.sty
Package: grfext 2016/05/16 v1.2 Manage graphics extensions (HO)
)
Package epstopdf-base Info: Redefining graphics rule for `.eps' on input line 4
38.
Package grfext Info: Graphics extension search list:
(grfext)             [.pdf,.png,.jpg,.eps]
(grfext)             \AppendGraphicsExtensions on input line 456.

(/usr/share/texlive/texmf-dist/tex/latex/latexconfig/epstopdf-sys.cfg
File: epstopdf-sys.cfg 2010/07/13 v1.3 Configuration of (r)epstopdf for TeX Liv
e
))
Package caption Info: Begin \AtBeginDocument code.
Package caption Info: hyperref package is loaded.
Package caption Info: rotating package is loaded.
Package caption Info: sidecap package is loaded.
Package caption Info: subfigure package is loaded.
Package caption Info: End \AtBeginDocument code.
\AtBeginShipoutBox=\box69
Package hyperref Info: Link coloring OFF on input line 164.

(/usr/share/texlive/texmf-dist/tex/latex/hyperref/nameref.sty
Package: nameref 2016/05/21 v2.44 Cross-referencing by name of section

(/usr/share/texlive/texmf-dist/tex/generic/oberdiek/gettitlestring.sty
Package: gettitlestring 2016/05/16 v1.5 Cleanup title references (HO)
)
\c@section@level=\count161
)
LaTeX Info: Redefining \ref on input line 164.
LaTeX Info: Redefining \pageref on input line 164.
LaTeX Info: Redefining \nameref on input line 164.

(/usr/share/texlive/texmf-dist/tex/latex/ms/ragged2e.sty
Package: ragged2e 2009/05/21 v2.1 ragged2e Package (MS)

(/usr/share/texlive/texmf-dist/tex/latex/ms/everysel.sty
Package: everysel 2011/10/28 v1.2 EverySelectfont Package (MS)

ABD: EverySelectfont initializing macros
LaTeX Info: Redefining \selectfont on input line 126.
)
\CenteringLeftskip=\skip77
\RaggedLeftLeftskip=\skip78
\RaggedRightLeftskip=\skip79
\CenteringRightskip=\skip80
\RaggedLeftRightskip=\skip81
\RaggedRightRightskip=\skip82
\CenteringParfillskip=\skip83
\RaggedLeftParfillskip=\skip84
\RaggedRightParfillskip=\skip85
\JustifyingParfillskip=\skip86
\CenteringParindent=\skip87
\RaggedLeftParindent=\skip88
\RaggedRightParindent=\skip89
\JustifyingParindent=\skip90
)
LaTeX Font Info:    Font shape `T1/ptm/bx/n' in size <17.28> not available
(Font)              Font shape `T1/ptm/b/n' tried instead on input line 185.
LaTeX Font Info:    Try loading font information for U+msa on input line 185.

(/usr/share/texlive/texmf-dist/tex/latex/amsfonts/umsa.fd
File: umsa.fd 2013/01/14 v3.01 AMS symbols A
)
LaTeX Font Info:    Try loading font information for U+msb on input line 185.

(/usr/share/texlive/texmf-dist/tex/latex/amsfonts/umsb.fd
File: umsb.fd 2013/01/14 v3.01 AMS symbols B
)

Package xcolor Warning: Incompatible color definition on input line 185.

LaTeX Font Info:    Font shape `T1/ptm/bx/n' in size <10> not available
(Font)              Font shape `T1/ptm/b/n' tried instead on input line 185.
LaTeX Font Info:    Try loading font information for T1+phv on input line 190.
(/usr/share/texlive/texmf-dist/tex/latex/psnfss/t1phv.fd
File: t1phv.fd 2001/06/04 scalable font definitions for T1/phv.
)
LaTeX Font Info:    Font shape `T1/phv/m/n' will be
(Font)              scaled to size 8.54997pt on input line 190.

Underfull \hbox (badness 10000) in paragraph at lines 193--203

 []


Underfull \hbox (badness 10000) in paragraph at lines 193--203

 []


Underfull \hbox (badness 10000) in paragraph at lines 193--203

 []


Underfull \hbox (badness 10000) in paragraph at lines 193--203

 []

[1

{/var/lib/texmf/fonts/map/pdftex/updmap/pdftex.map}] [2]
Underfull \hbox (badness 10000) in paragraph at lines 205--208

 []


Underfull \hbox (badness 10000) in paragraph at lines 211--214

 []

[3]
LaTeX Font Info:    Try loading font information for TS1+ptm on input line 218.

 (/usr/share/texlive/texmf-dist/tex/latex/psnfss/ts1ptm.fd
File: ts1ptm.fd 2001/06/04 font definitions for TS1/ptm.
) [4]
Underfull \hbox (badness 10000) in paragraph at lines 233--242

 []


Underfull \hbox (badness 10000) in paragraph at lines 233--242

 []


Underfull \hbox (badness 10000) in paragraph at lines 233--242

 []


Underfull \hbox (badness 10000) in paragraph at lines 233--242

 []

[5] [6]
Underfull \hbox (badness 10000) in paragraph at lines 243--249

 []


Underfull \hbox (badness 10000) in paragraph at lines 243--249

 []

[7]
Underfull \hbox (badness 10000) in paragraph at lines 256--259

 []

[8]
Underfull \hbox (badness 10000) in paragraph at lines 265--268

 []

[9] (./template.bbl [10] [11]) [12]
<fig/StudyArea.png, id=285, 3812.0016pt x 3732.0228pt>
File: fig/StudyArea.png Graphic file (type png)
 <use fig/StudyArea.png>
Package pdftex.def Info: fig/StudyArea.png used on input line 291.
(pdftex.def)             Requested size: 302.17133pt x 295.77757pt.
LaTeX Font Info:    Font shape `T1/ptm/bx/n' in size <9> not available
(Font)              Font shape `T1/ptm/b/n' tried instead on input line 292.

<fig/AnnualSpatial.png, id=287, 1827.82875pt x 660.4675pt>
File: fig/AnnualSpatial.png Graphic file (type png)

<use fig/AnnualSpatial.png>
Package pdftex.def Info: fig/AnnualSpatial.png used on input line 298.
(pdftex.def)             Requested size: 503.61377pt x 181.9768pt.

Overfull \hbox (6.79999pt too wide) in paragraph at lines 298--299
 [][][] 
 []

<fig/AnnualPrecipitation_hist.png, id=288, 1138.0116pt x 455.0601pt>
File: fig/AnnualPrecipitation_hist.png Graphic file (type png)

<use fig/AnnualPrecipitation_hist.png>
Package pdftex.def Info: fig/AnnualPrecipitation_hist.png used on input line 30
4.
(pdftex.def)             Requested size: 503.61377pt x 201.3797pt.


LaTeX Warning: No positions in optional float specifier.
               Default added (so using `tbp') on input line 308.

<fig/SmallBox_done.png, id=289, 2276.0232pt x 1603.9122pt>
File: fig/SmallBox_done.png Graphic file (type png)

<use fig/SmallBox_done.png>
Package pdftex.def Info: fig/SmallBox_done.png used on input line 310.
(pdftex.def)             Requested size: 402.89255pt x 283.91937pt.

<fig/Tp_SpatialSeason_done.png, id=290, 397.485pt x 483.0045pt>
File: fig/Tp_SpatialSeason_done.png Graphic file (type png)

<use fig/Tp_SpatialSeason_done.png>
Package pdftex.def Info: fig/Tp_SpatialSeason_done.png used on input line 315.
(pdftex.def)             Requested size: 402.89255pt x 489.59212pt.

<fig/MonPrec.png, id=291, 1138.0116pt x 341.3553pt>
File: fig/MonPrec.png Graphic file (type png)
 <use fig/MonPrec.png>
Package pdftex.def Info: fig/MonPrec.png used on input line 321.
(pdftex.def)             Requested size: 503.61377pt x 151.06142pt.

<fig/plot_SumSpatialTrend_done.png, id=292, 423.984pt x 139.722pt>
File: fig/plot_SumSpatialTrend_done.png Graphic file (type png)

<use fig/plot_SumSpatialTrend_done.png>
Package pdftex.def Info: fig/plot_SumSpatialTrend_done.png used on input line 3
27.
(pdftex.def)             Requested size: 503.61377pt x 165.96849pt.

<fig/SumSpatialTrend_hist.png, id=293, 1138.0116pt x 455.0601pt>
File: fig/SumSpatialTrend_hist.png Graphic file (type png)

<use fig/SumSpatialTrend_hist.png>
Package pdftex.def Info: fig/SumSpatialTrend_hist.png used on input line 333.
(pdftex.def)             Requested size: 503.61377pt x 201.3797pt.

<fig/plot_WinSpatialTrend_done.png, id=294, 423.984pt x 139.722pt>
File: fig/plot_WinSpatialTrend_done.png Graphic file (type png)

<use fig/plot_WinSpatialTrend_done.png>
Package pdftex.def Info: fig/plot_WinSpatialTrend_done.png used on input line 3
39.
(pdftex.def)             Requested size: 503.61377pt x 165.96849pt.

<fig/WinSpatialTrend_hist.png, id=295, 1138.0116pt x 455.0601pt>
File: fig/WinSpatialTrend_hist.png Graphic file (type png)

<use fig/WinSpatialTrend_hist.png>
Package pdftex.def Info: fig/WinSpatialTrend_hist.png used on input line 345.
(pdftex.def)             Requested size: 503.61377pt x 201.3797pt.

<fig/Bhuntar_annual_pre.png, id=296, 569.0058pt x 341.3553pt>
File: fig/Bhuntar_annual_pre.png Graphic file (type png)

<use fig/Bhuntar_annual_pre.png>
Package pdftex.def Info: fig/Bhuntar_annual_pre.png used on input line 351.
(pdftex.def)             Requested size: 503.61377pt x 302.12285pt.

Overfull \hbox (6.79999pt too wide) in paragraph at lines 351--352
 [][][] 
 []

<fig/Bhuntar_month_pre.png, id=297, 512.03294pt x 284.5029pt>
File: fig/Bhuntar_month_pre.png Graphic file (type png)

<use fig/Bhuntar_month_pre.png>
Package pdftex.def Info: fig/Bhuntar_month_pre.png used on input line 358.
(pdftex.def)             Requested size: 503.61377pt x 279.82242pt.

Overfull \hbox (6.79999pt too wide) in paragraph at lines 358--359
 [][][] 
 []

<fig/acc_prec_disc.png, id=298, 1422.5145pt x 569.0058pt>
File: fig/acc_prec_disc.png Graphic file (type png)

<use fig/acc_prec_disc.png>
Package pdftex.def Info: fig/acc_prec_disc.png used on input line 366.
(pdftex.def)             Requested size: 503.61377pt x 201.43846pt.

<fig/winterHGT_T2_WRF.png, id=299, 1194.864pt x 569.0058pt>
File: fig/winterHGT_T2_WRF.png Graphic file (type png)

<use fig/winterHGT_T2_WRF.png>
Package pdftex.def Info: fig/winterHGT_T2_WRF.png used on input line 372.
(pdftex.def)             Requested size: 503.61377pt x 239.82298pt.
 [13

 <./fig/StudyArea.png

pdfTeX warning: pdflatex (file ./fig/StudyArea.png): large interlaced PNG might
 cause out of memory (use non-interlaced PNG to fix this)
>] [14 <./fig/AnnualSpatial.png> <./fig/AnnualPrecipitation_hist.png>] [15 <./f
ig/SmallBox_done.png>] [16 <./fig/Tp_SpatialSeason_done.png>] [17 <./fig/MonPre
c.png> <./fig/plot_SumSpatialTrend_done.png>] [18 <./fig/SumSpatialTrend_hist.p
ng> <./fig/plot_WinSpatialTrend_done.png>] [19 <./fig/WinSpatialTrend_hist.png>
 <./fig/Bhuntar_annual_pre.png>] [20 <./fig/Bhuntar_month_pre.png> <./fig/acc_p
rec_disc.png>] [21 <./fig/winterHGT_T2_WRF.png (PNG copy)>]
LaTeX Font Info:    Font shape `T1/ptm/bx/it' in size <9> not available
(Font)              Font shape `T1/ptm/b/it' tried instead on input line 482.
 [22

] [23]
<fig/resample_AnnualSpatial.png, id=364, 1738.495pt x 662.475pt>
File: fig/resample_AnnualSpatial.png Graphic file (type png)

<use fig/resample_AnnualSpatial.png>
Package pdftex.def Info: fig/resample_AnnualSpatial.png used on input line 496.

(pdftex.def)             Requested size: 503.61377pt x 191.91066pt.

Overfull \hbox (6.79999pt too wide) in paragraph at lines 496--497
 [][][] 
 []

<fig/ncdc.png, id=365, 545.6385pt x 388.8126pt>
File: fig/ncdc.png Graphic file (type png)
 <use fig/ncdc.png>
Package pdftex.def Info: fig/ncdc.png used on input line 502.
(pdftex.def)             Requested size: 503.61377pt x 358.86882pt.

Overfull \hbox (6.79999pt too wide) in paragraph at lines 502--503
 [][][] 
 []

[24

 <./fig/resample_AnnualSpatial.png>] [25 <./fig/ncdc.png>] [26

]

Class copernicus Warning: No section Conclusions; proceeding without it.

Package atveryend Info: Empty hook `BeforeClearDocument' on input line 527.
Package atveryend Info: Empty hook `AfterLastShipout' on input line 527.
(./template.aux)
Package atveryend Info: Executing hook `AtVeryEndDocument' on input line 527.
Package atveryend Info: Empty hook `AtEndAfterFileList' on input line 527.
Package atveryend Info: Empty hook `AtVeryVeryEnd' on input line 527.
 ) 
Here is how much of TeX's memory you used:
 11674 strings out of 493013
 163711 string characters out of 6135682
 301972 words of memory out of 5000000
 14830 multiletter control sequences out of 15000+600000
 51141 words of font info for 78 fonts, out of 8000000 for 9000
 1141 hyphenation exceptions out of 8191
 43i,18n,40p,1974b,509s stack positions out of 5000i,500n,10000p,200000b,80000s
{/usr/share/texlive/texmf-dist/fonts/enc/dvips/base/8r.enc}</usr/share/texliv
e/texmf-dist/fonts/type1/public/amsfonts/cm/cmsy10.pfb></usr/share/texlive/texm
f-dist/fonts/type1/public/amsfonts/cm/cmsy6.pfb></usr/share/texlive/texmf-dist/
fonts/type1/public/amsfonts/cm/cmsy7.pfb></usr/share/texlive/texmf-dist/fonts/t
ype1/public/amsfonts/cm/cmsy9.pfb></usr/share/texlive/texmf-dist/fonts/type1/pu
blic/amsfonts/latxfont/line10.pfb></usr/share/texlive/texmf-dist/fonts/type1/ur
w/helvetic/uhvr8a.pfb></usr/share/texlive/texmf-dist/fonts/type1/urw/times/utmb
8a.pfb></usr/share/texlive/texmf-dist/fonts/type1/urw/times/utmbi8a.pfb></usr/s
hare/texlive/texmf-dist/fonts/type1/urw/times/utmr8a.pfb></usr/share/texlive/te
xmf-dist/fonts/type1/urw/times/utmri8a.pfb>
Output written on template.pdf (26 pages, 9649797 bytes).
PDF statistics:
 444 PDF objects out of 1000 (max. 8388607)
 373 compressed objects within 4 object streams
 110 named destinations out of 1000 (max. 500000)
 81 words of extra memory for PDF output out of 10000 (max. 10000000)
