# Supplementary material for: Precipitation pattern in the Western Himalayas revealed by four datasets
Source: Copernicus journal article supplement (doi:10.5194/hess-22-5097-2018), 2018-10-04
Supplement: Supplementary file 1 [file hess-22-5097-2018-supplement.zip › wrf_namelist.txt]

 &time_control
 run_days                            = NoDays,
 run_hours                           = NoHours,
 run_minutes                         = NoMins,
 run_seconds                         = NoSec,
 start_year                          = OldYYYY, OldYYYY,
 start_month                         = OldMM, OldMM,
 start_day                           = OldDD, OldDD,
 start_hour                          = OldHH, OldHH,
 start_minute                        = Oldmm, Oldmm,
 start_second                        = Oldss, Oldss,
 end_year                            = NewYYYY, NewYYYY,
 end_month                           = NewMM, NewMM,
 end_day                             = NewDD, NewDD,
 end_hour                            = NewHH, NewHH,
 end_minute                          = Newmm, Newmm,
 end_second                          = Newss, Newss,
 interval_seconds                    = 21600,
 input_from_file                     = .true., .true.,
 history_interval                    = 360, 360,
 frames_per_outfile                  = 1, 1,
 restart                             = .true.,
 restart_interval                    = RstStep,   
 io_form_history                     = 2
 io_form_restart                     = 2
 io_form_input                       = 2
 io_form_boundary                    = 2
 debug_level                         = Debug,
 auxinput4_inname                    = "wrflowinp_d<domain>",
 auxinput4_interval                  = 360,
 io_form_auxinput4                   = 2,
 output_diagnostics                  = 1,  
 auxhist3_outname                    = "wrfcrdx24hxtr_d<domain>_<date>", 
 io_form_auxhist3                    = 2,       
 auxhist3_interval                   = 1440,    
 frames_per_auxhist3                 = 1,       
/ 

 &domains
 use_adaptive_time_step              = .false.,
 step_to_output_time                 = .true.,
 target_cfl                          = 1.2,
 max_step_increase_pct               = 5,
 starting_time_step                  = -1, 
 max_time_step                       = -1, 
 min_time_step                       = 20,
 time_step                           = RunTimeStep,
 time_step_fract_num                 = 0,
 time_step_fract_den                 = 1,
 max_dom                             = 1,
 i_parent_start                      = 1, 89,
 j_parent_start                      = 1, 62,
 e_we                                = 193,
 e_sn                                = 241,
 s_vert                              =   1,
 e_vert                              = 30, 30,
 num_metgrid_levels                  = 38,
 dx                                  = 16306.03,
 dy                                  = 16306.03, 
 grid_id                             = 1, 2,
 parent_id                           = 0, 1,
 parent_grid_ratio                   = 1, 2,
 parent_time_step_ratio              = 1, 
 feedback                            = 0,
 smooth_option                       = 0,
 smooth_cg_topo                      = .true.,
 p_top_requested                     = 5000,
 /

 &physics
 mp_physics                          = 8, 
 ra_lw_physics                       = 3, 3, 
 ra_sw_physics                       = 3, 3,
 radt                                = 50, 
 sf_sfclay_physics                   = 2, 2,
 sf_surface_physics                  = 2, 2,
 bl_pbl_physics                      = 2, !0, !2,
 bldt                                = 0,
 cu_physics                          = 1, 
 cudt                                = 5,
 kfeta_trigger                       = 3,  
 isfflx                              = 1,
 ifsnow                              = 0,
 icloud                              = 1,
 surface_input_source                = 1,
 num_soil_layers                     = 4,
 num_land_cat                        = 20,
 mp_zero_out                         = 2, 
 mp_zero_out_thresh                  = 1.e-8
 maxiens                             = 1,
 maxens                              = 3,
 maxens2                             = 3,
 maxens3                             = 16,
 ensdim                              = 144,
 cam_abs_freq_s                      = 21600,
 levsiz                              = 59,
 paerlev                             = 29,
 cam_abs_dim1                        = 4,
 cam_abs_dim2                        = 28,
 sst_update                          = 1,
 slope_rad                           = 0,
 topo_shading                        = 0,
 lagday                              = 140,
 tmn_update                          = 1,
 sst_skin                            = 1,
 usemonalb                           = .true., 
 traj_opt                            = 1, !0, !1
 isftcflx                            = 1, 
 pxlsm_smois_init                    = 0,
 /


 &fdda
 obs_scl_neg_qv_innov = 1, !1 = prevent to nudge toward negative QV  
 /

 &dynamics
 w_damping                           = 1,
 diff_opt                            = 2, !1,
 km_opt                              = 4,
 diff_6th_opt                        = 2, !0,
 diff_6th_factor                     = 0.12,
 base_temp                           = 290.
 damp_opt                            = 3,
 zdamp                               = 3000.,
 dampcoef                            = 0.2,
 khdif                               = 0, 
 kvdif                               = 0,
 non_hydrostatic                     = .true.,
 moist_adv_opt                       = 1,
 gwd_opt                             = 1,
 /

 &bdy_control
 spec_bdy_width                      = 10,
 spec_zone                           = 1,
 relax_zone                          = 9,
 spec_exp                            = 0.33
 specified                           = .true., 
 nested                              = .false., .true.,
 periodic_x                          = .false.,
 /

 &grib2
 /

 &namelist_quilt
 nio_tasks_per_group = 0,
 nio_groups = 1,
 /
