# Supplementary figures and images for: Precipitation pattern in the Western Himalayas revealed by four datasets
Source: Copernicus journal article supplement (doi:10.5194/hess-22-5097-2018), 2018-10-04

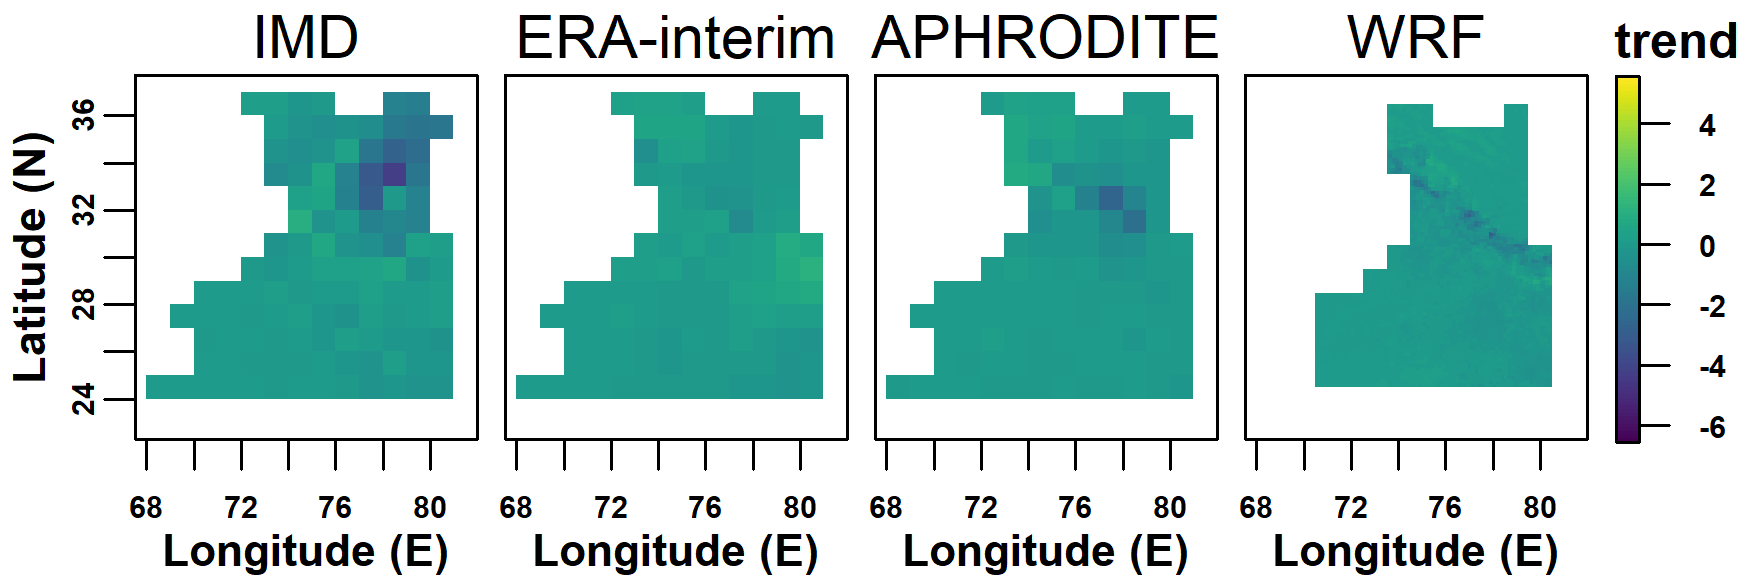

Supplement: Supplementary file 1 [file hess-22-5097-2018-supplement.zip › fig/plot_WinSpatialTrend_done.png]

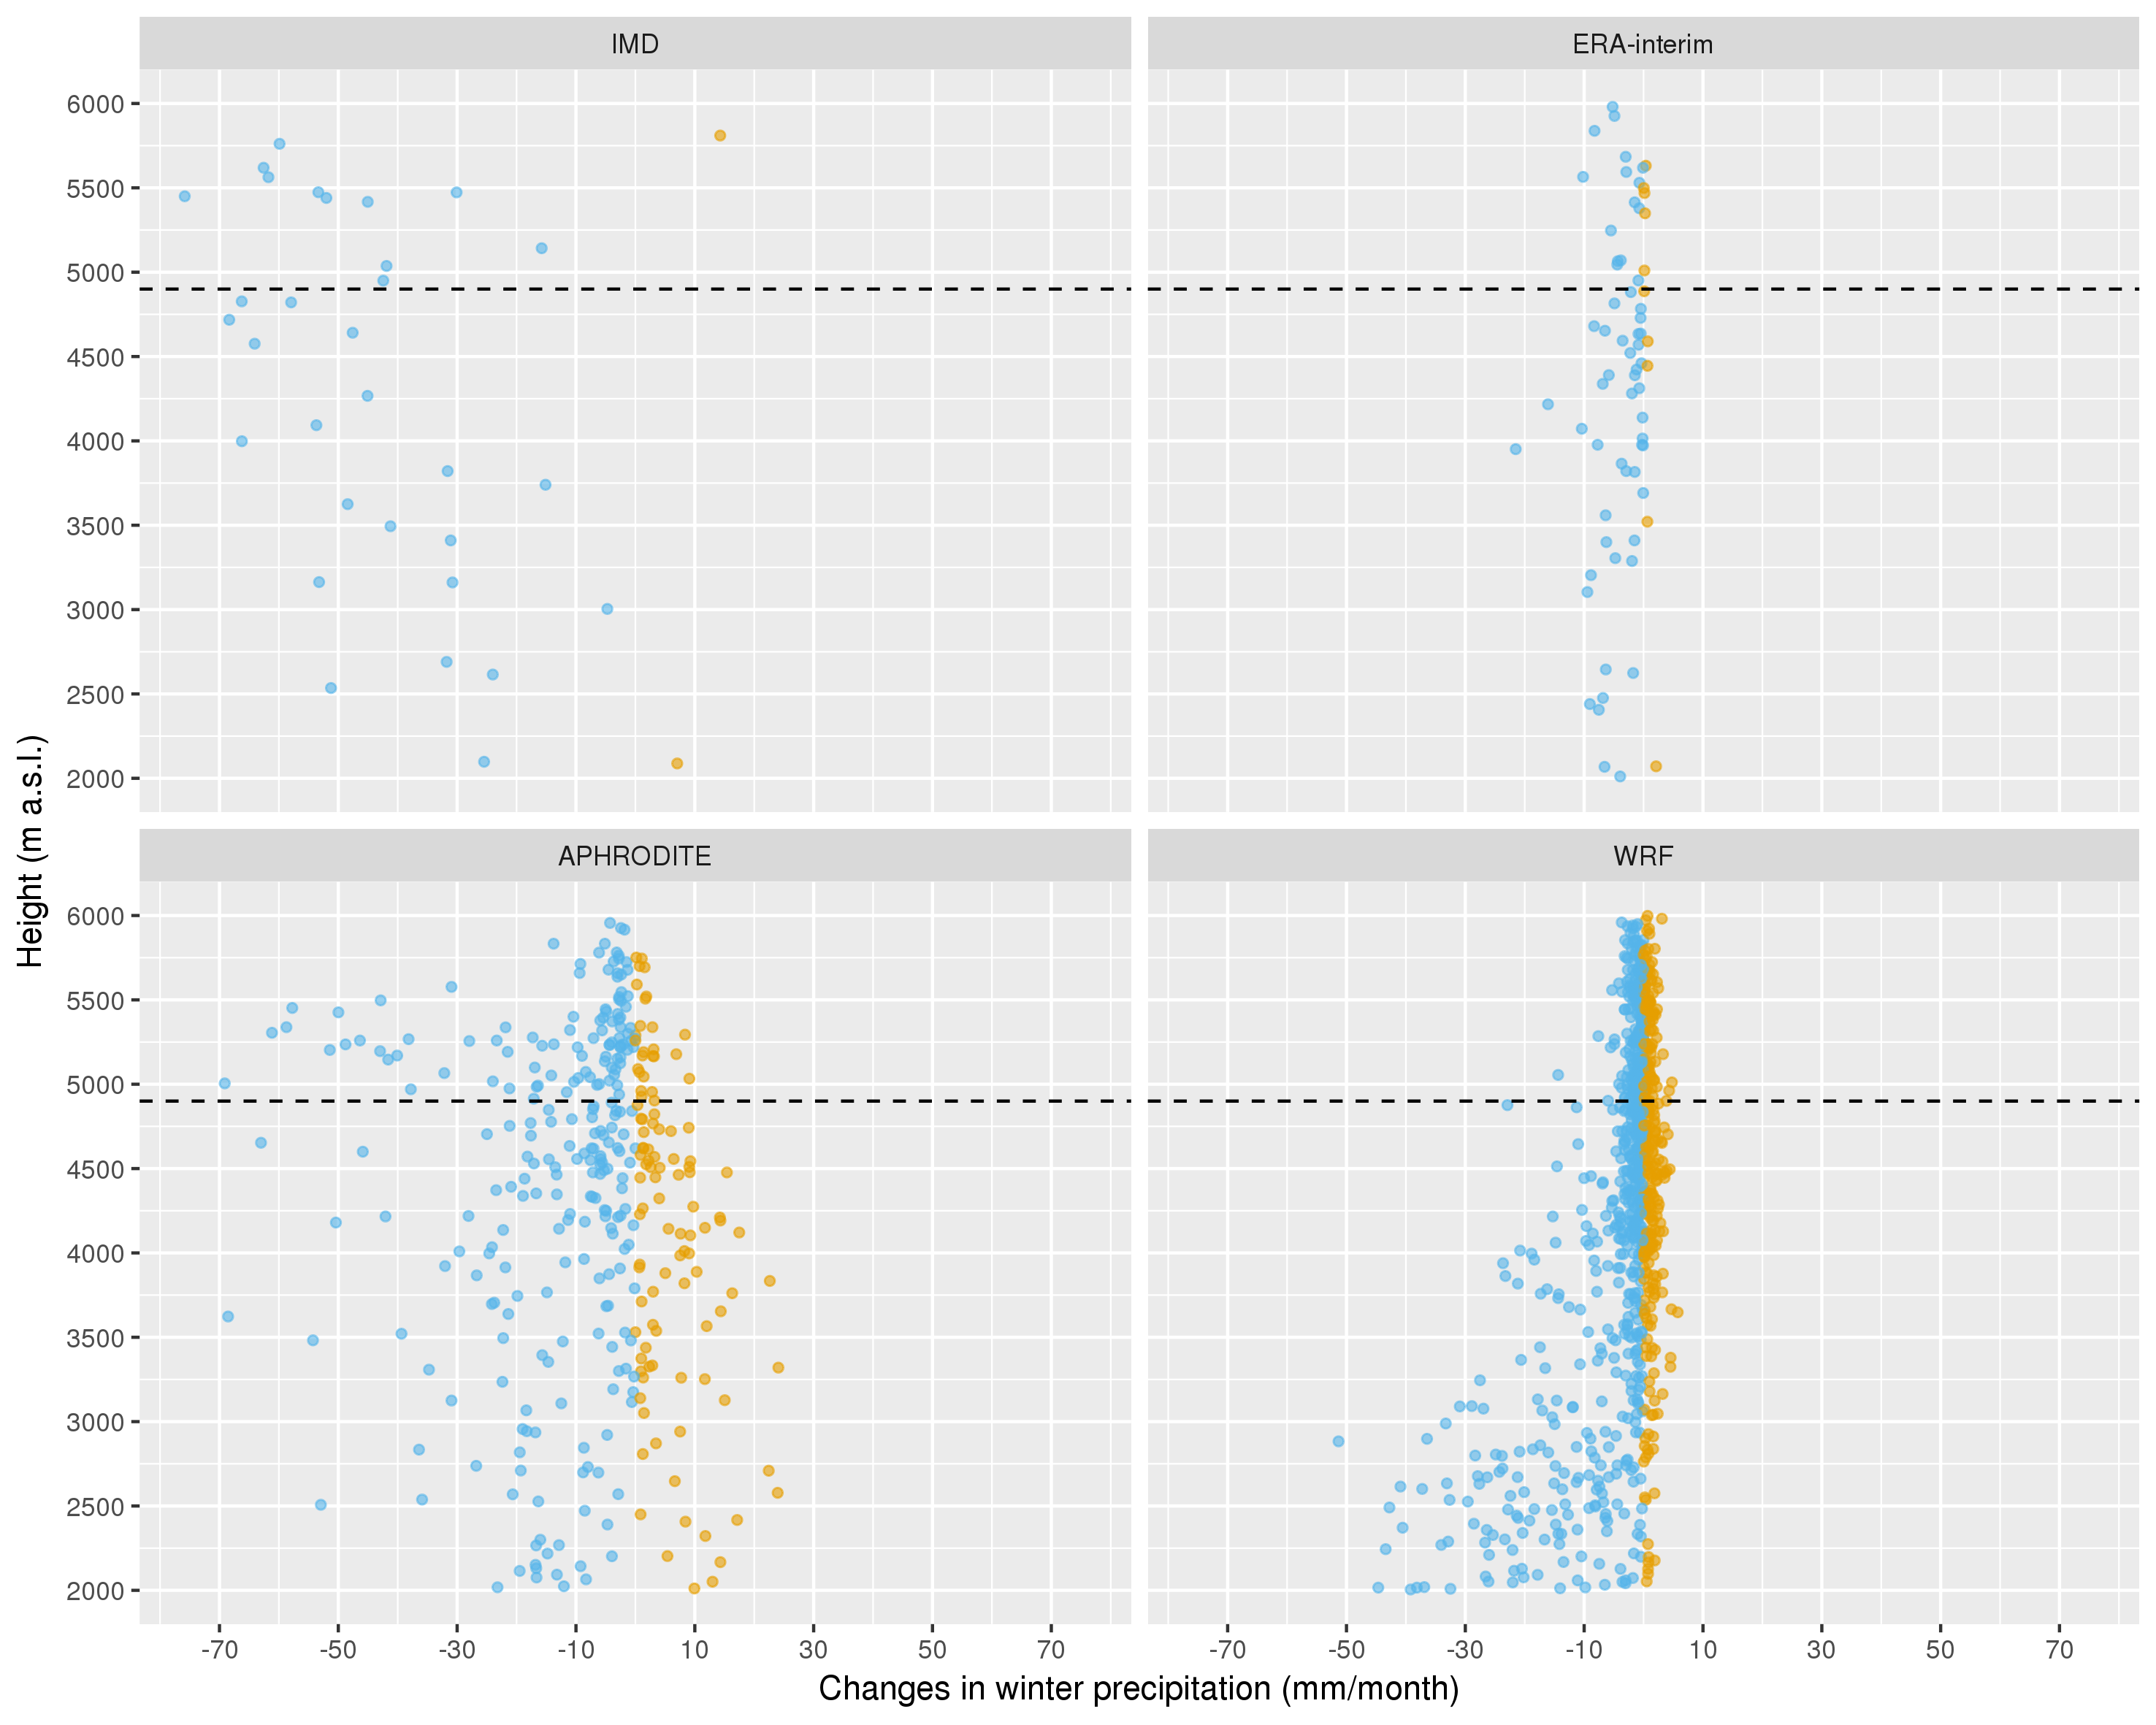

Supplement: Supplementary file 1 [file hess-22-5097-2018-supplement.zip › fig/winterHGT_Tp_Diff.png]

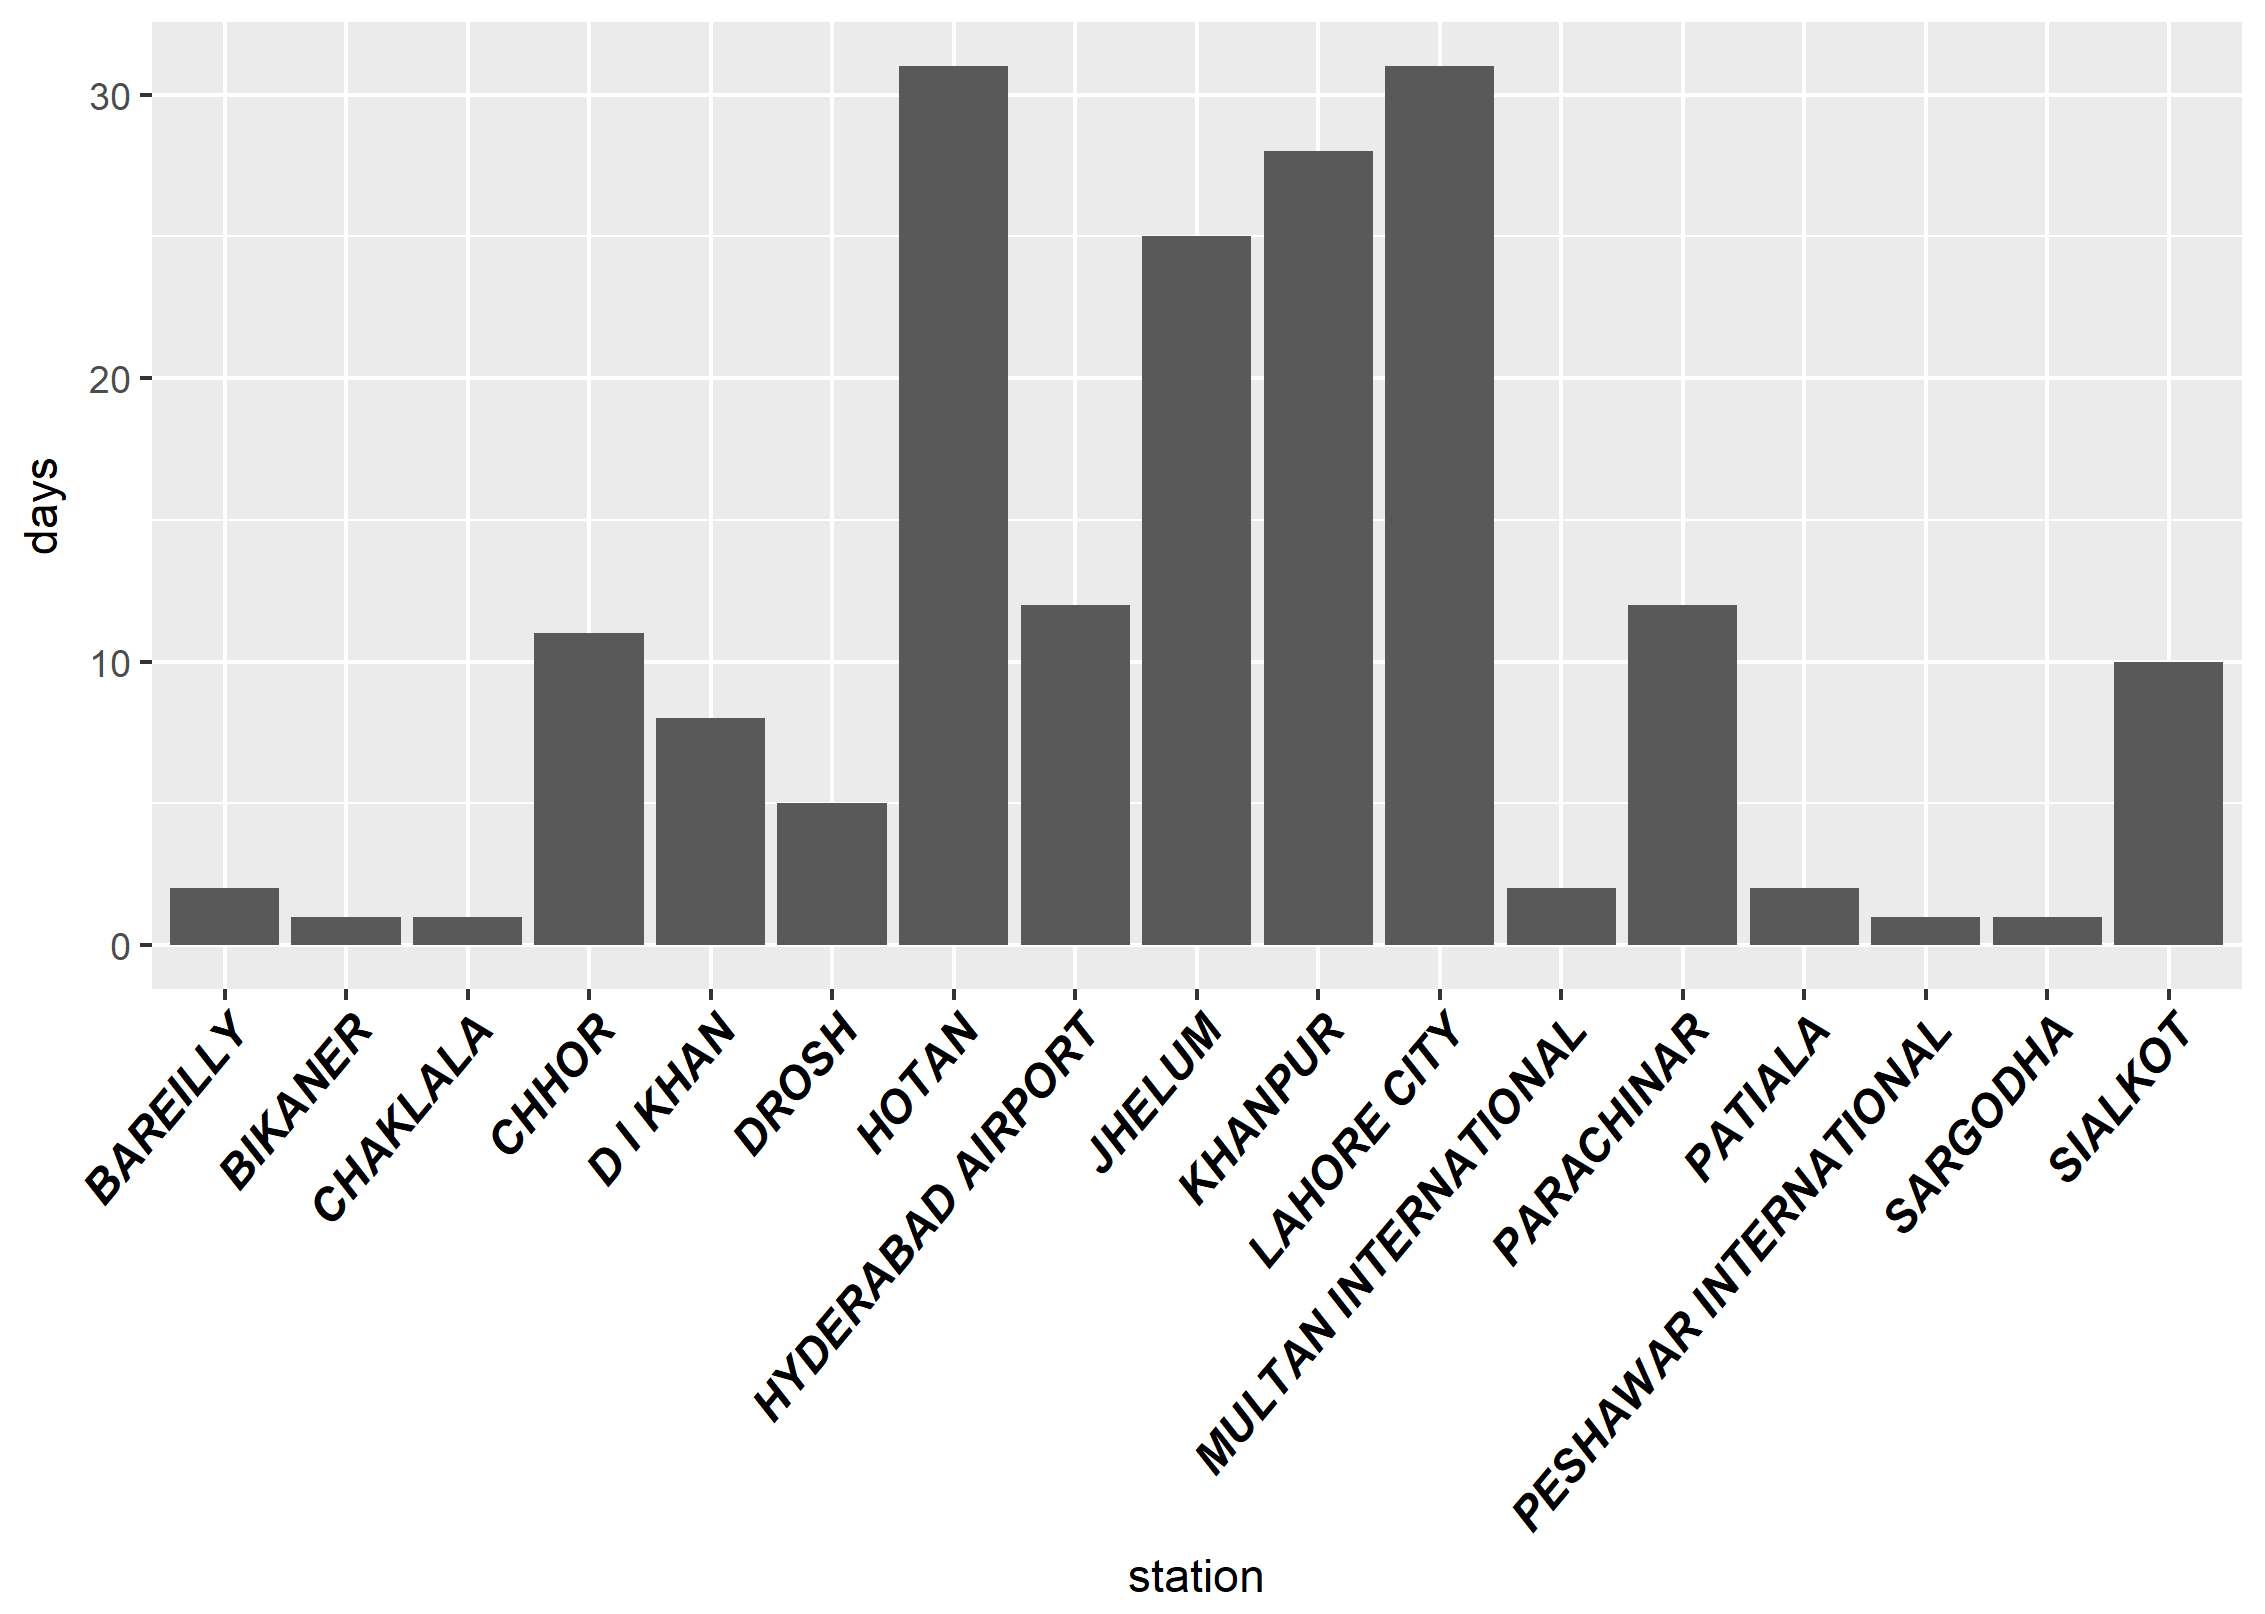

Supplement: Supplementary file 1 [file hess-22-5097-2018-supplement.zip › fig/ncdc.png]

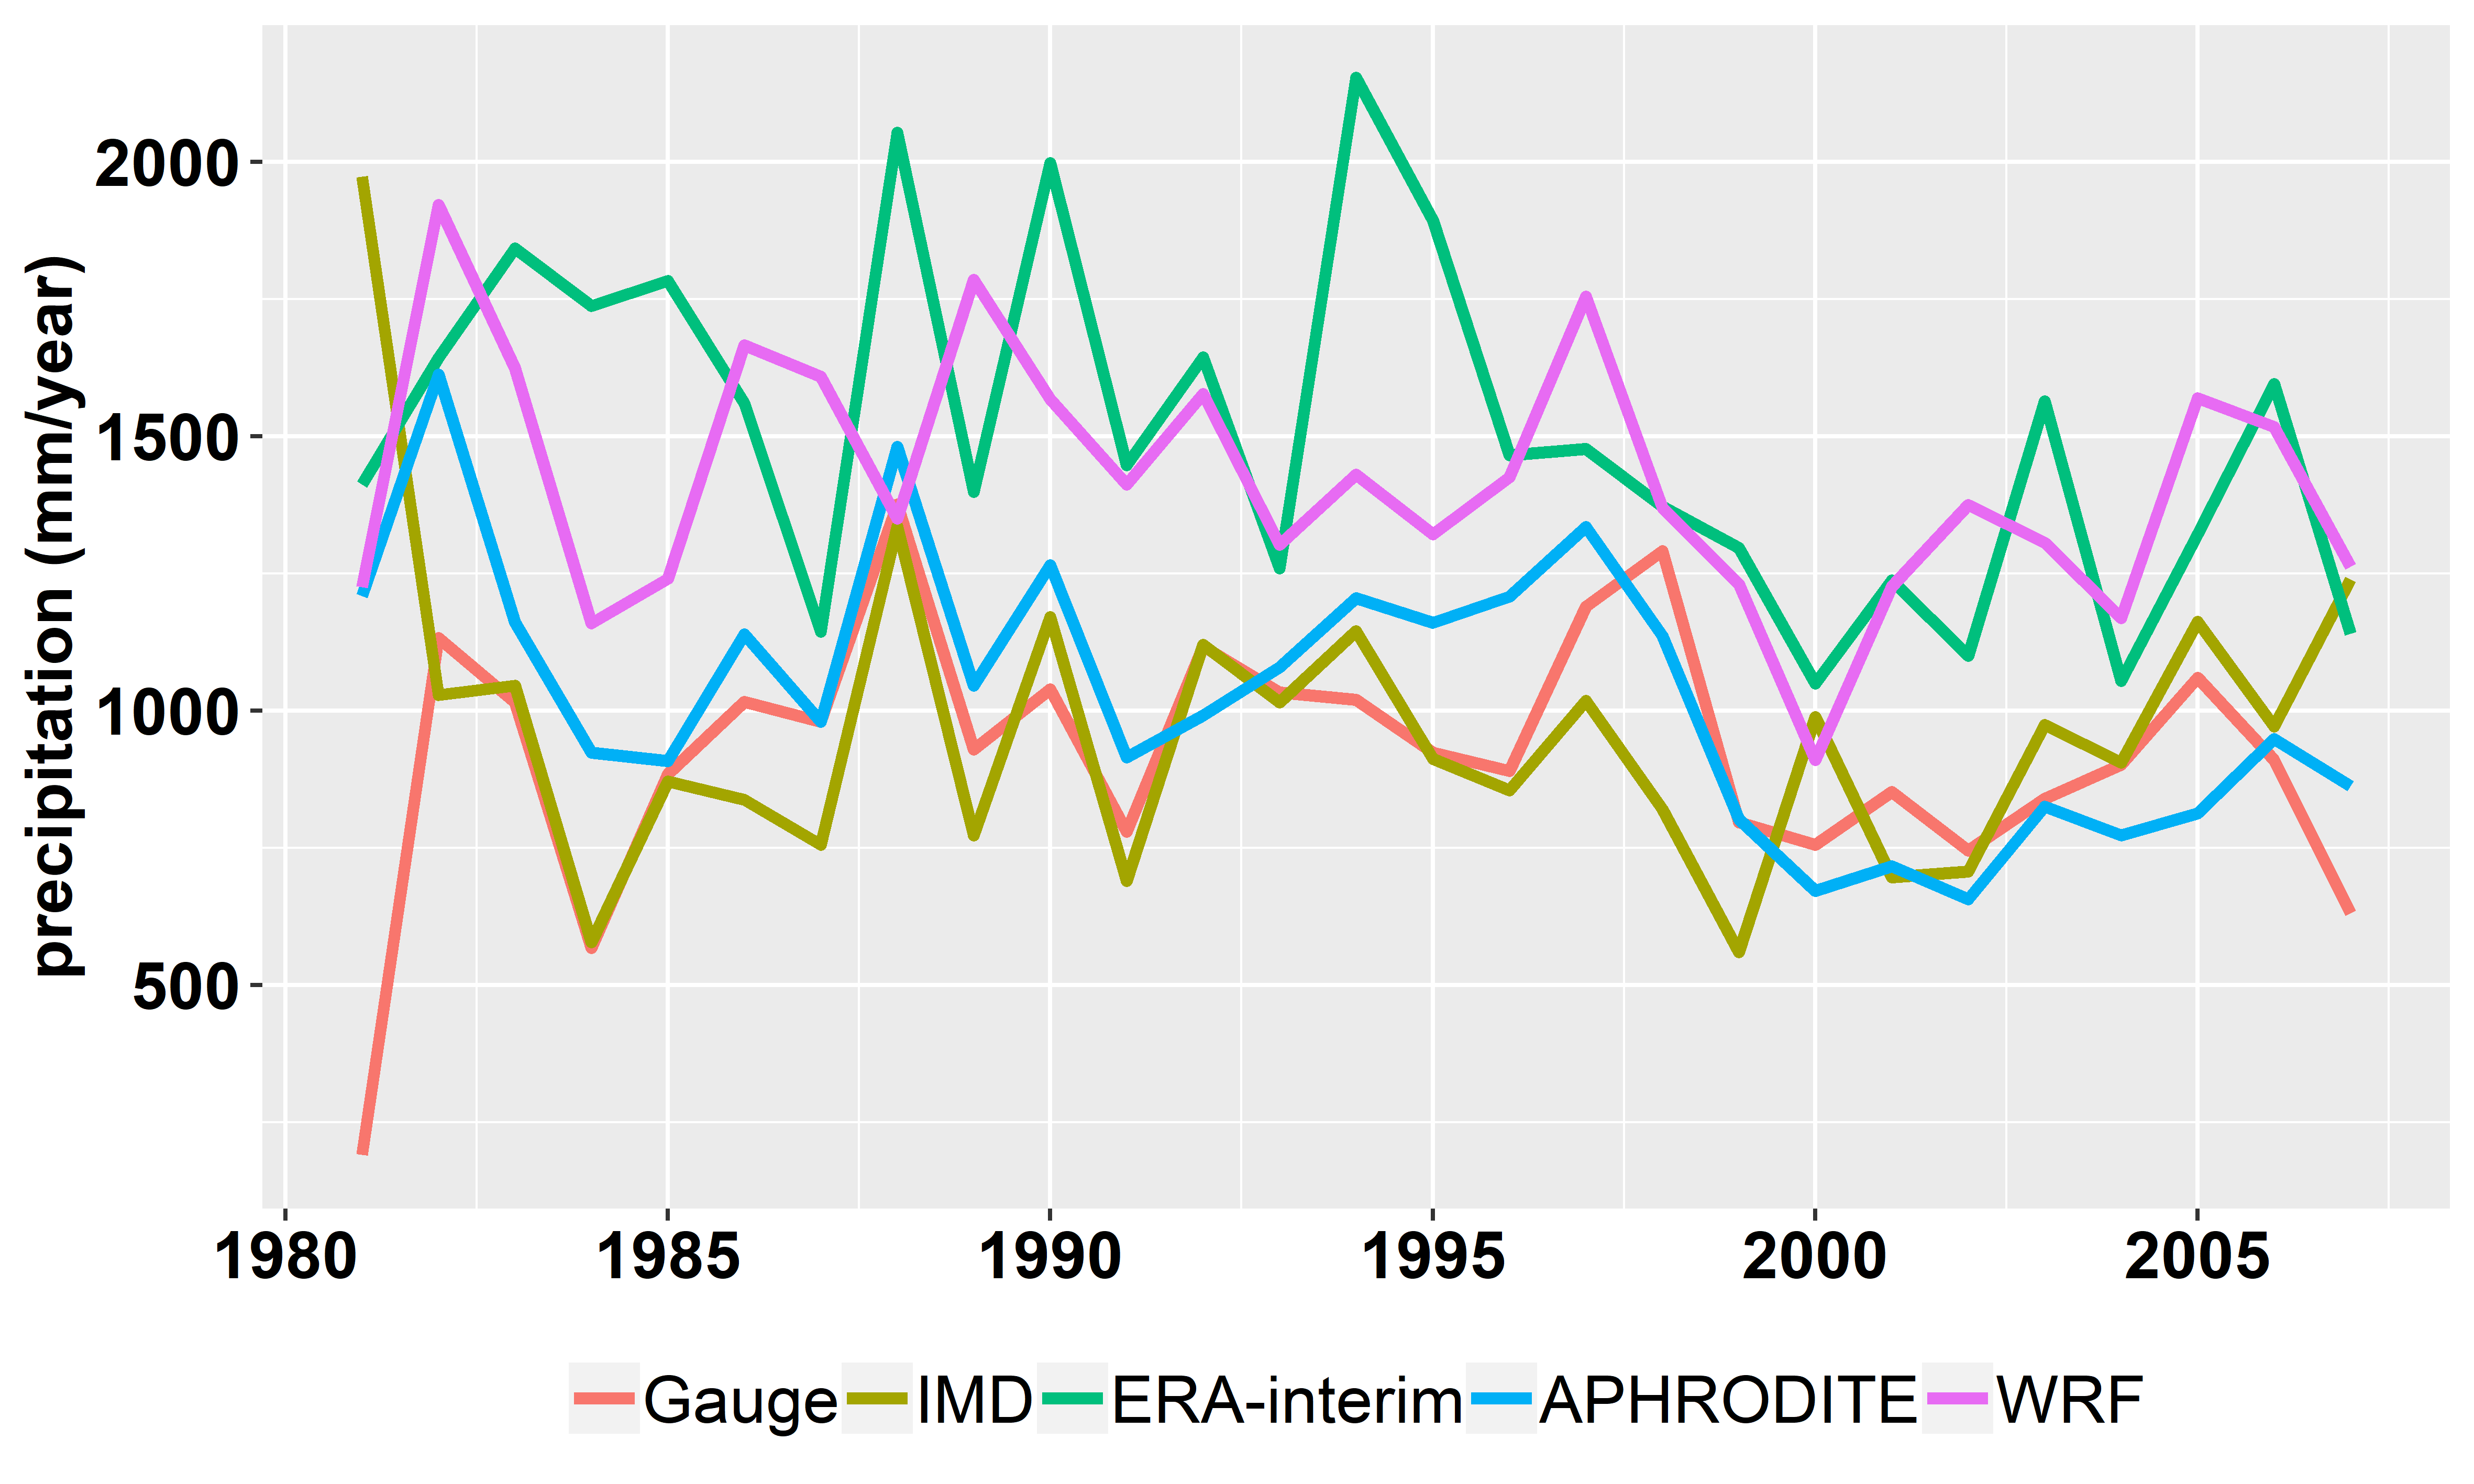

Supplement: Supplementary file 1 [file hess-22-5097-2018-supplement.zip › fig/Bhuntar_annual_pre.png]

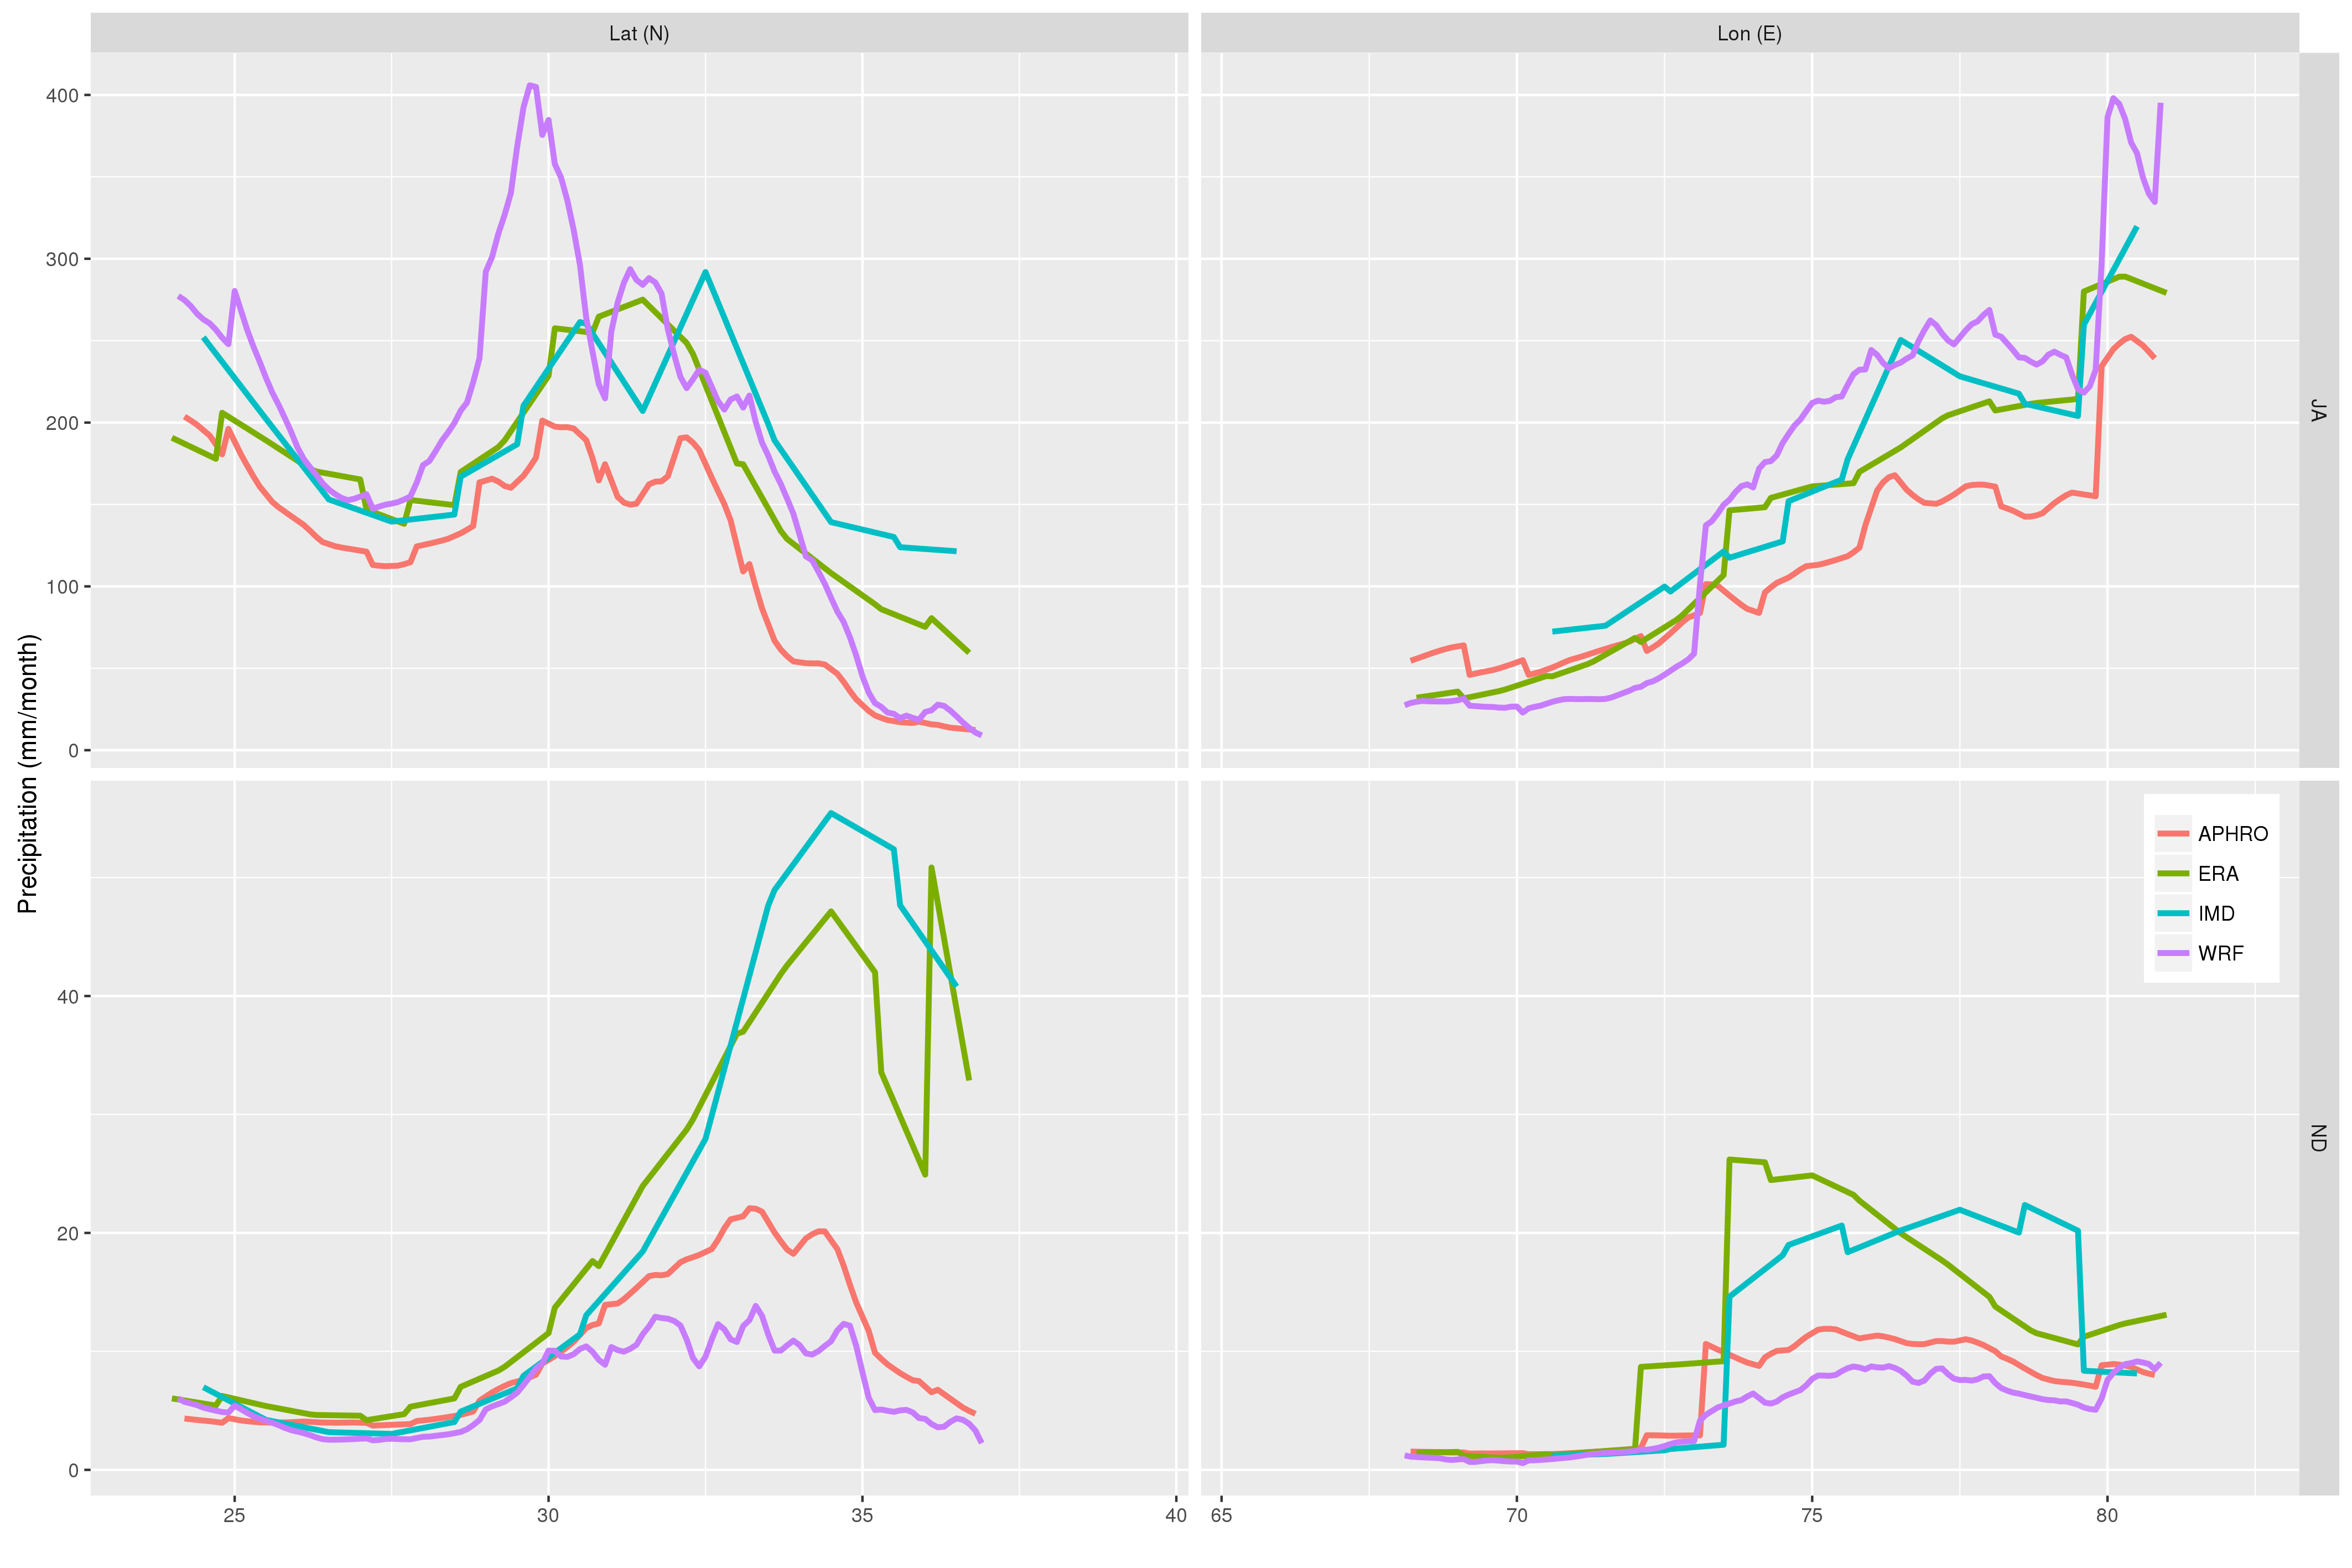

Supplement: Supplementary file 1 [file hess-22-5097-2018-supplement.zip › fig/zon_mer_mean.png]

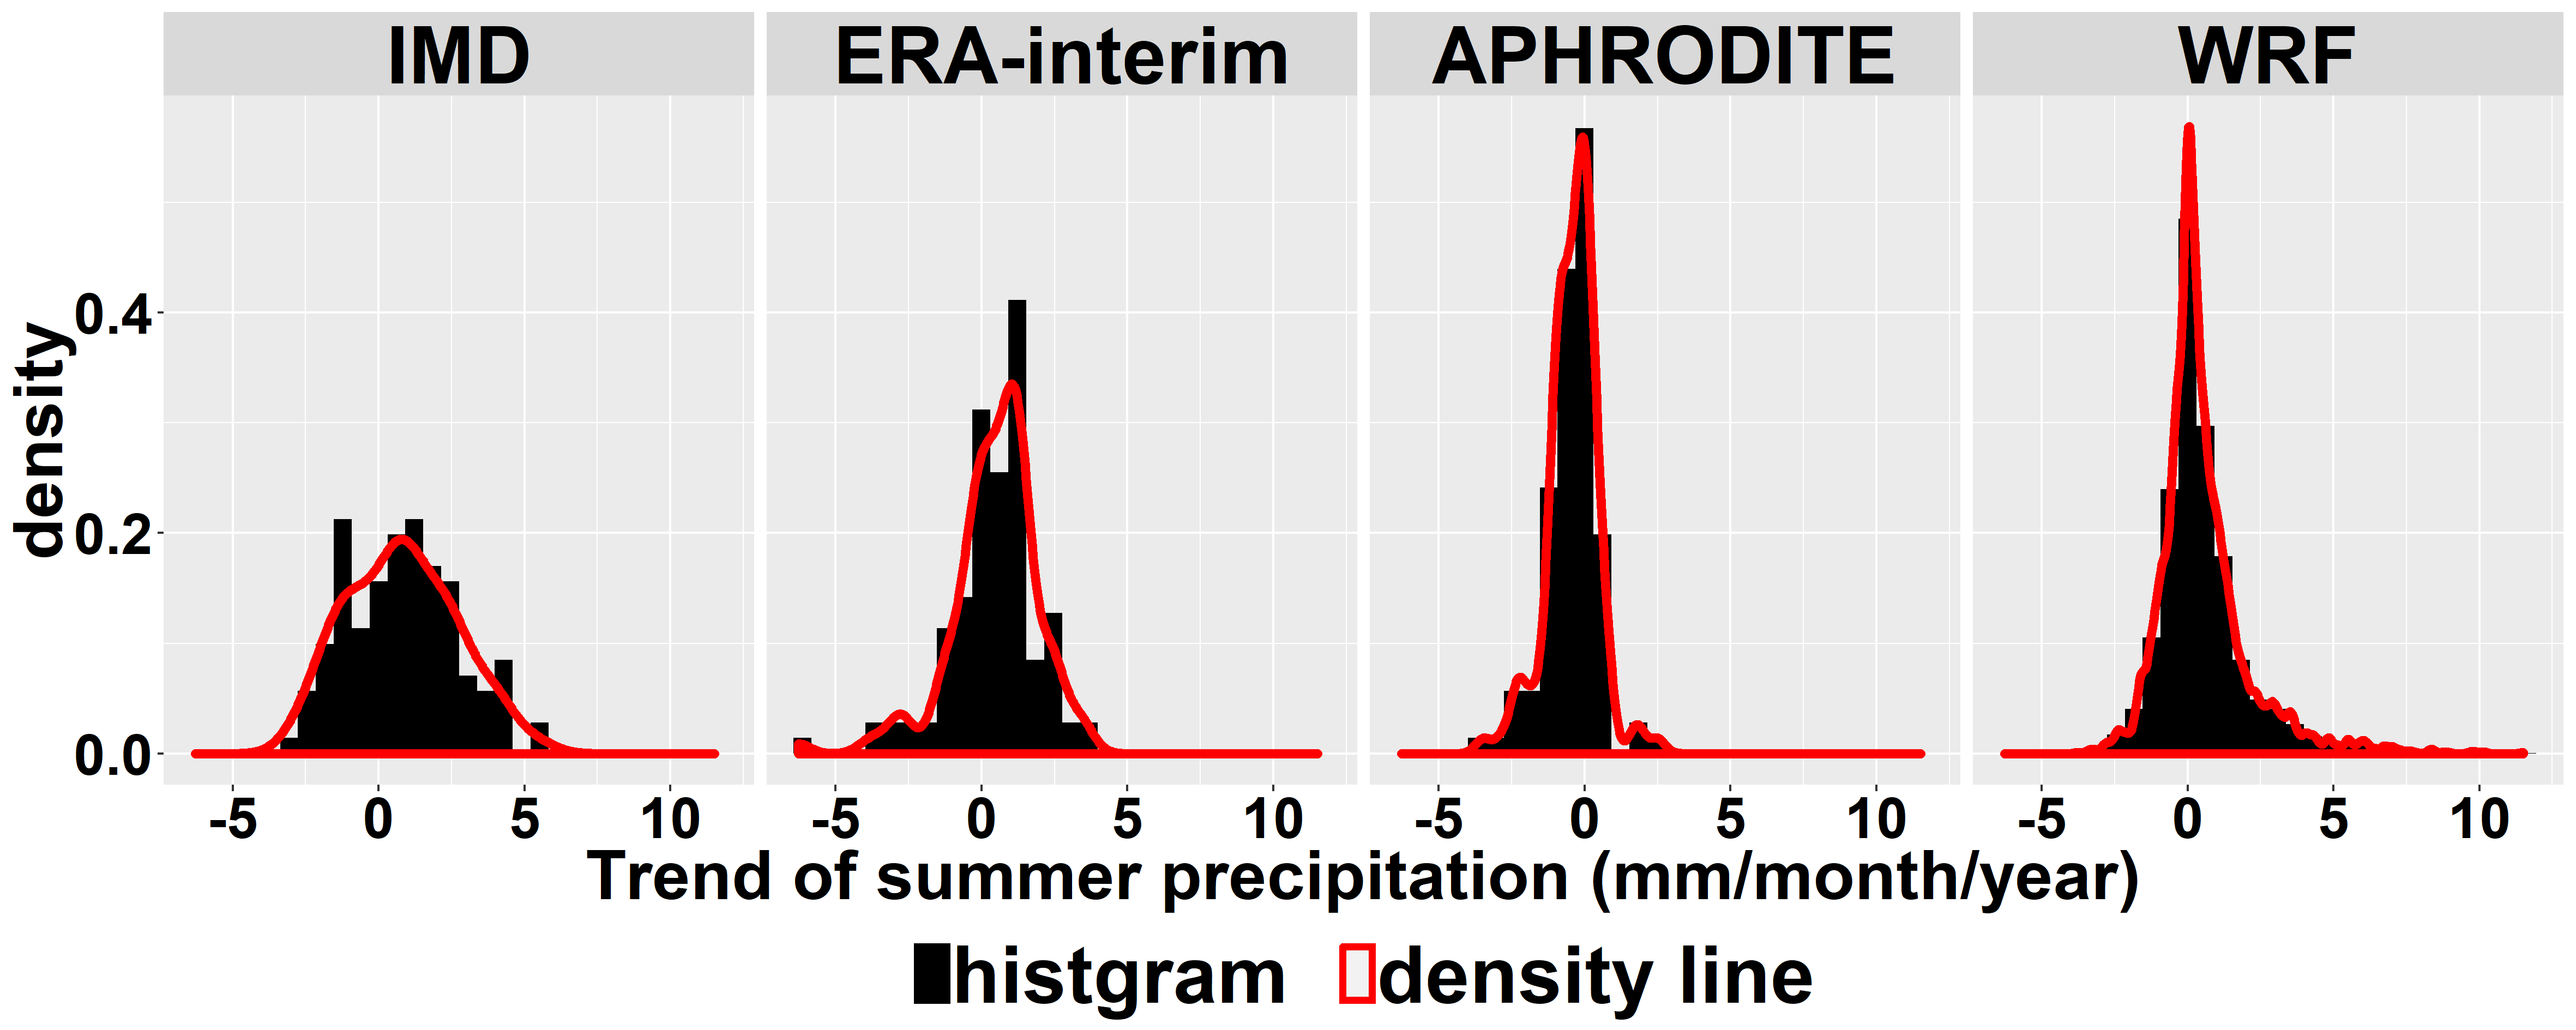

Supplement: Supplementary file 1 [file hess-22-5097-2018-supplement.zip › fig/SumSpatialTrend_hist.png]

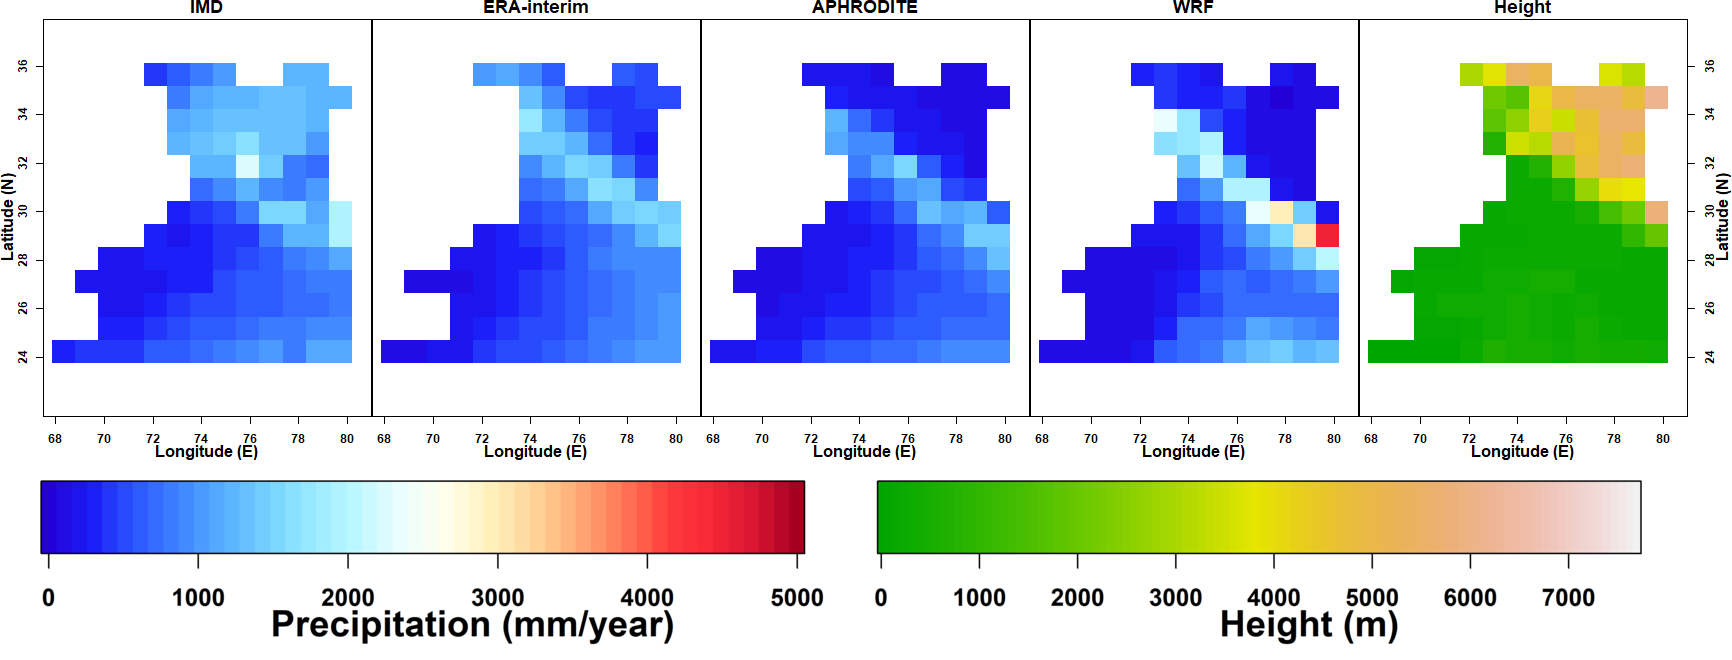

Supplement: Supplementary file 1 [file hess-22-5097-2018-supplement.zip › fig/resample_AnnualSpatial.png]

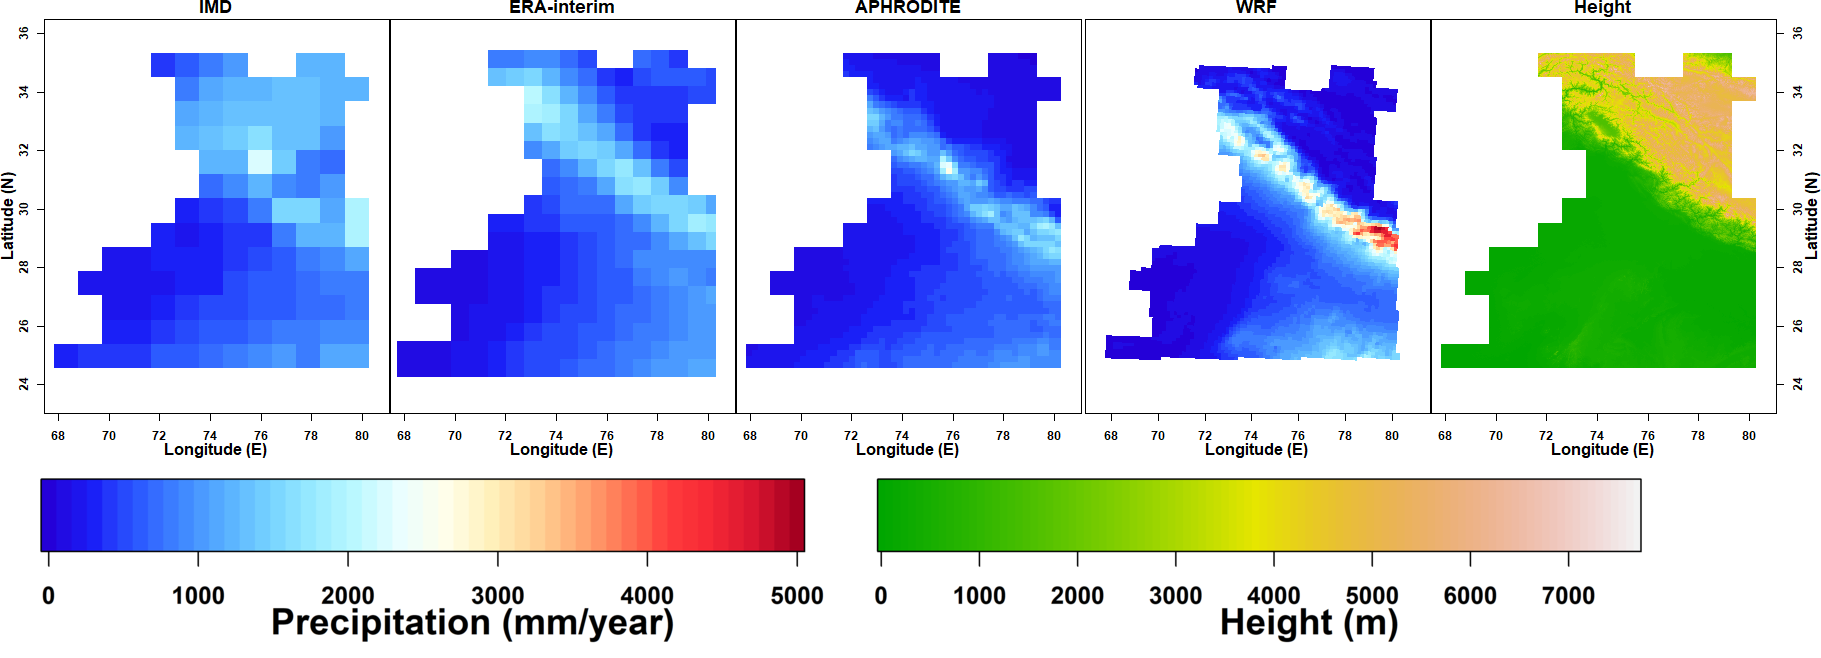

Supplement: Supplementary file 1 [file hess-22-5097-2018-supplement.zip › fig/AnnualSpatial.png]

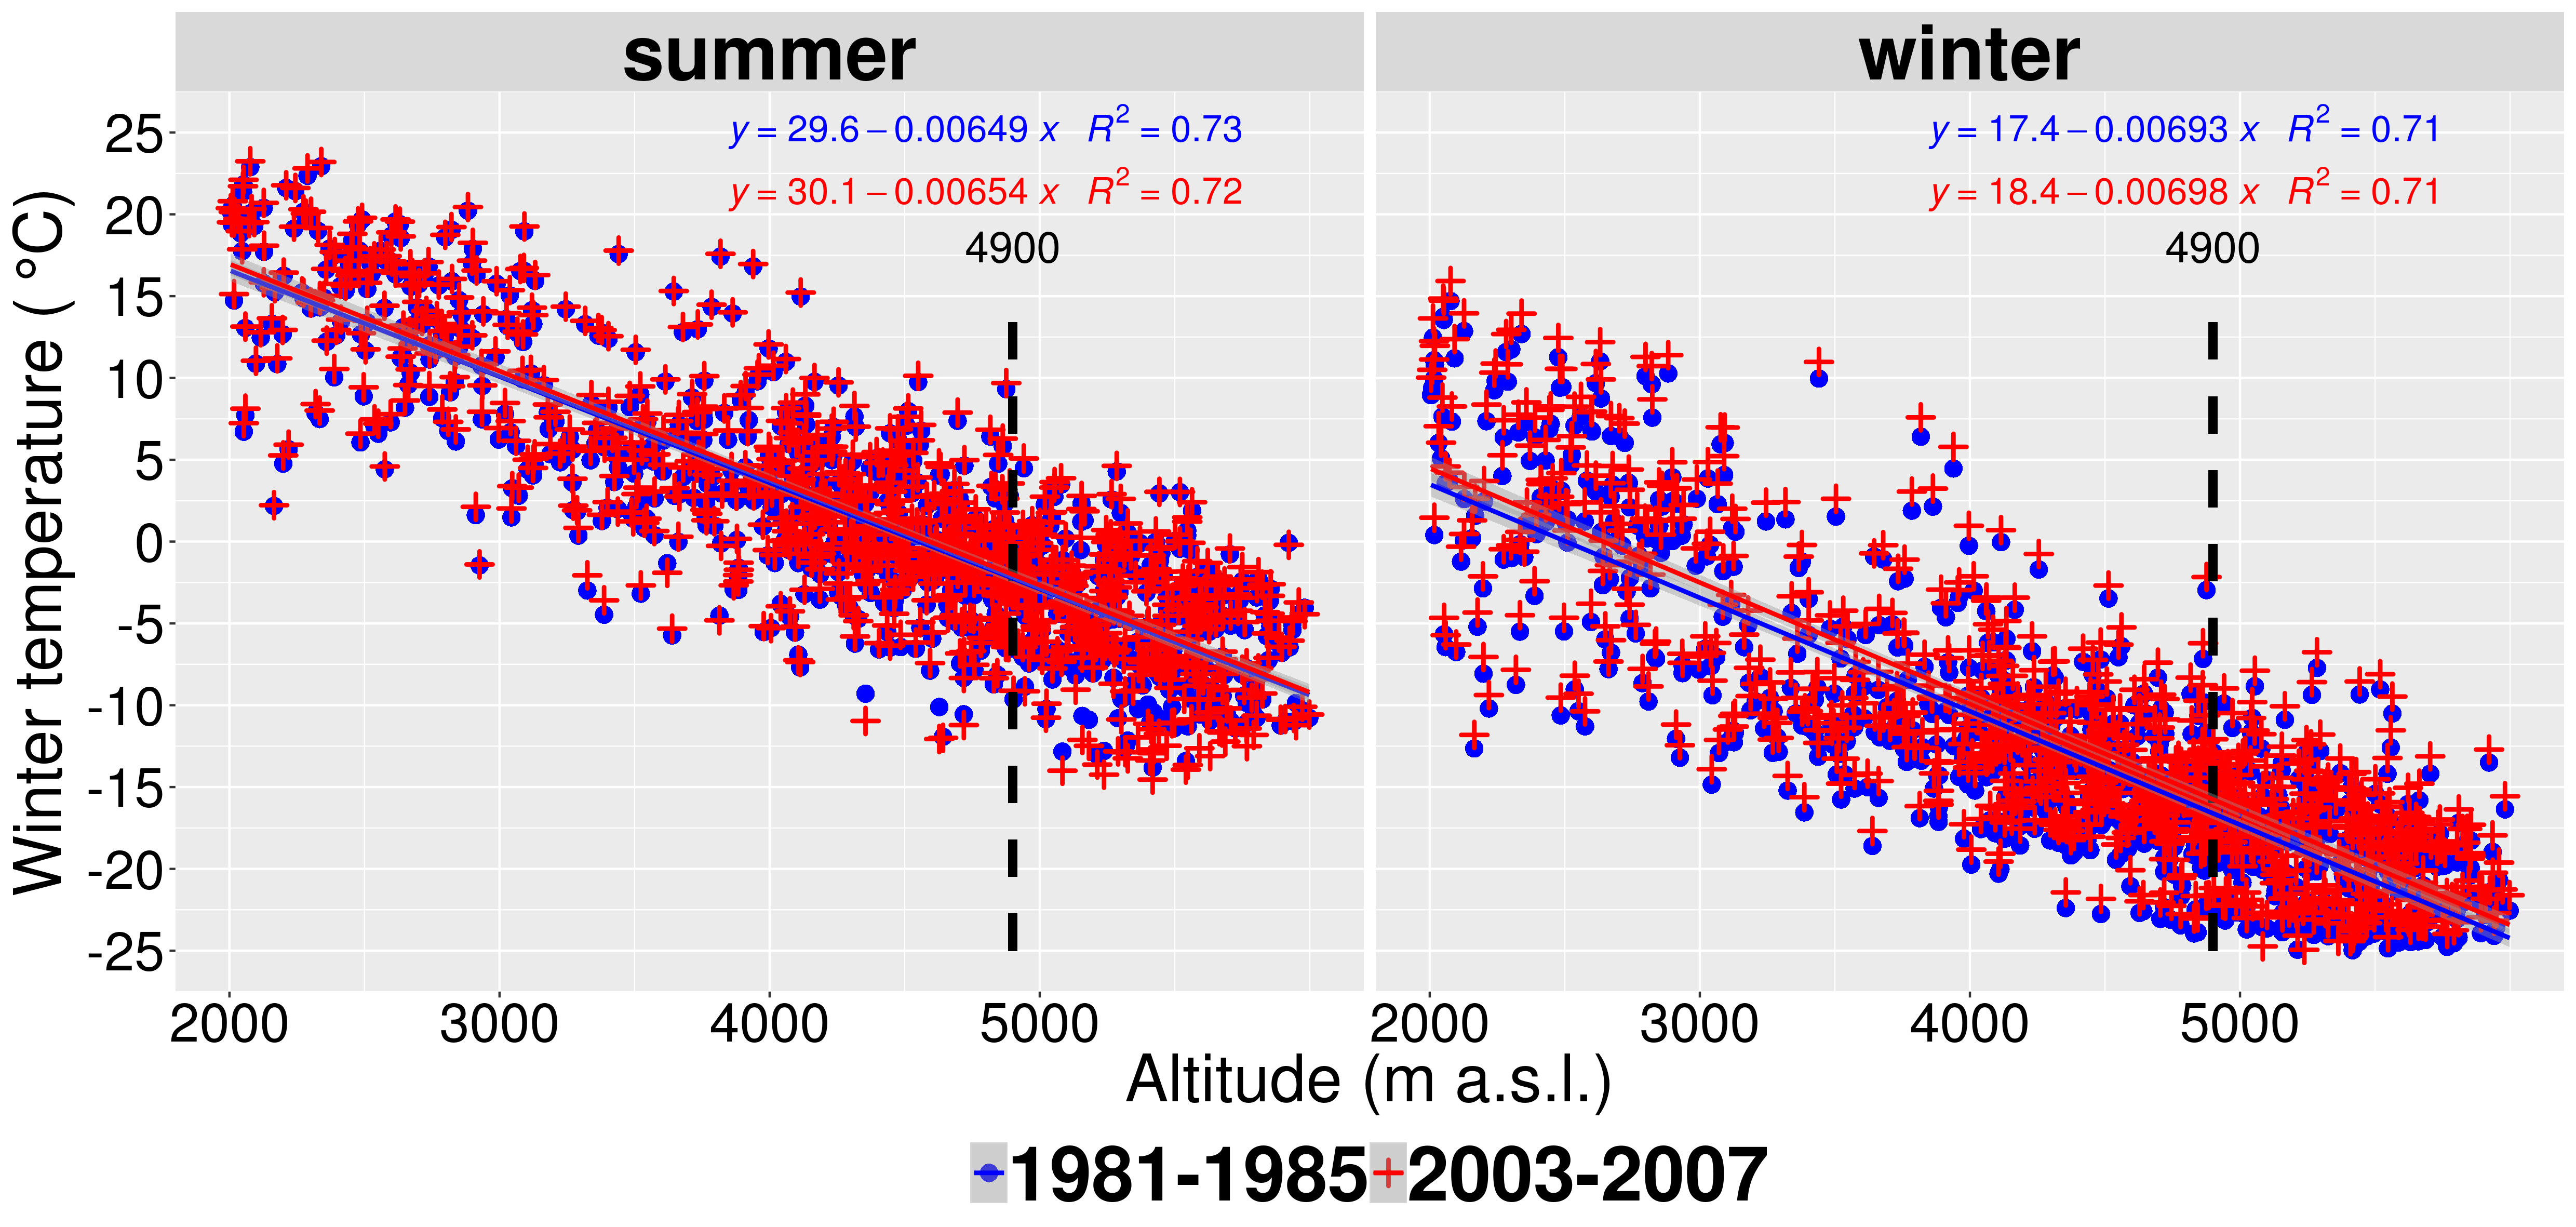

Supplement: Supplementary file 1 [file hess-22-5097-2018-supplement.zip › fig/winterHGT_T2_WRF.png]

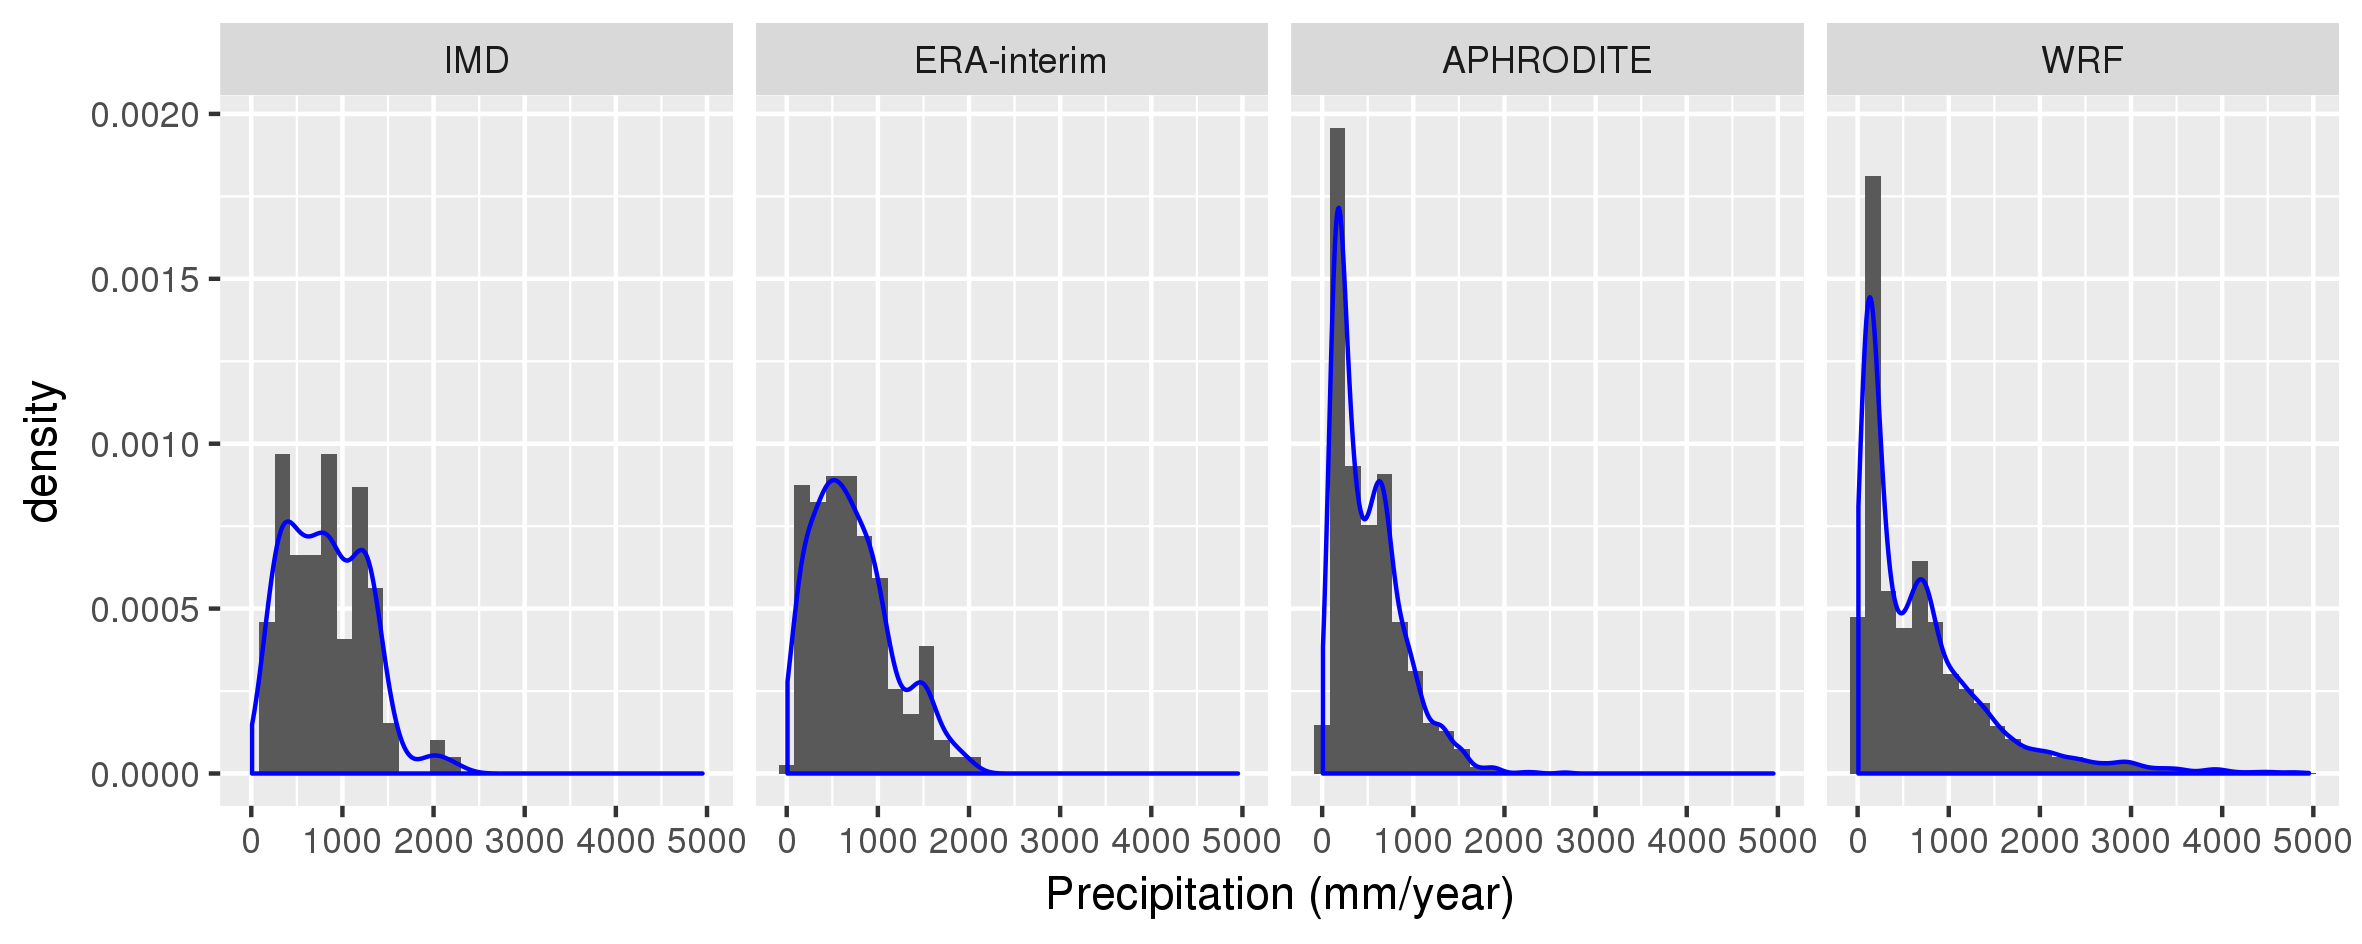

Supplement: Supplementary file 1 [file hess-22-5097-2018-supplement.zip › fig/annual_Spatial_hist.png]

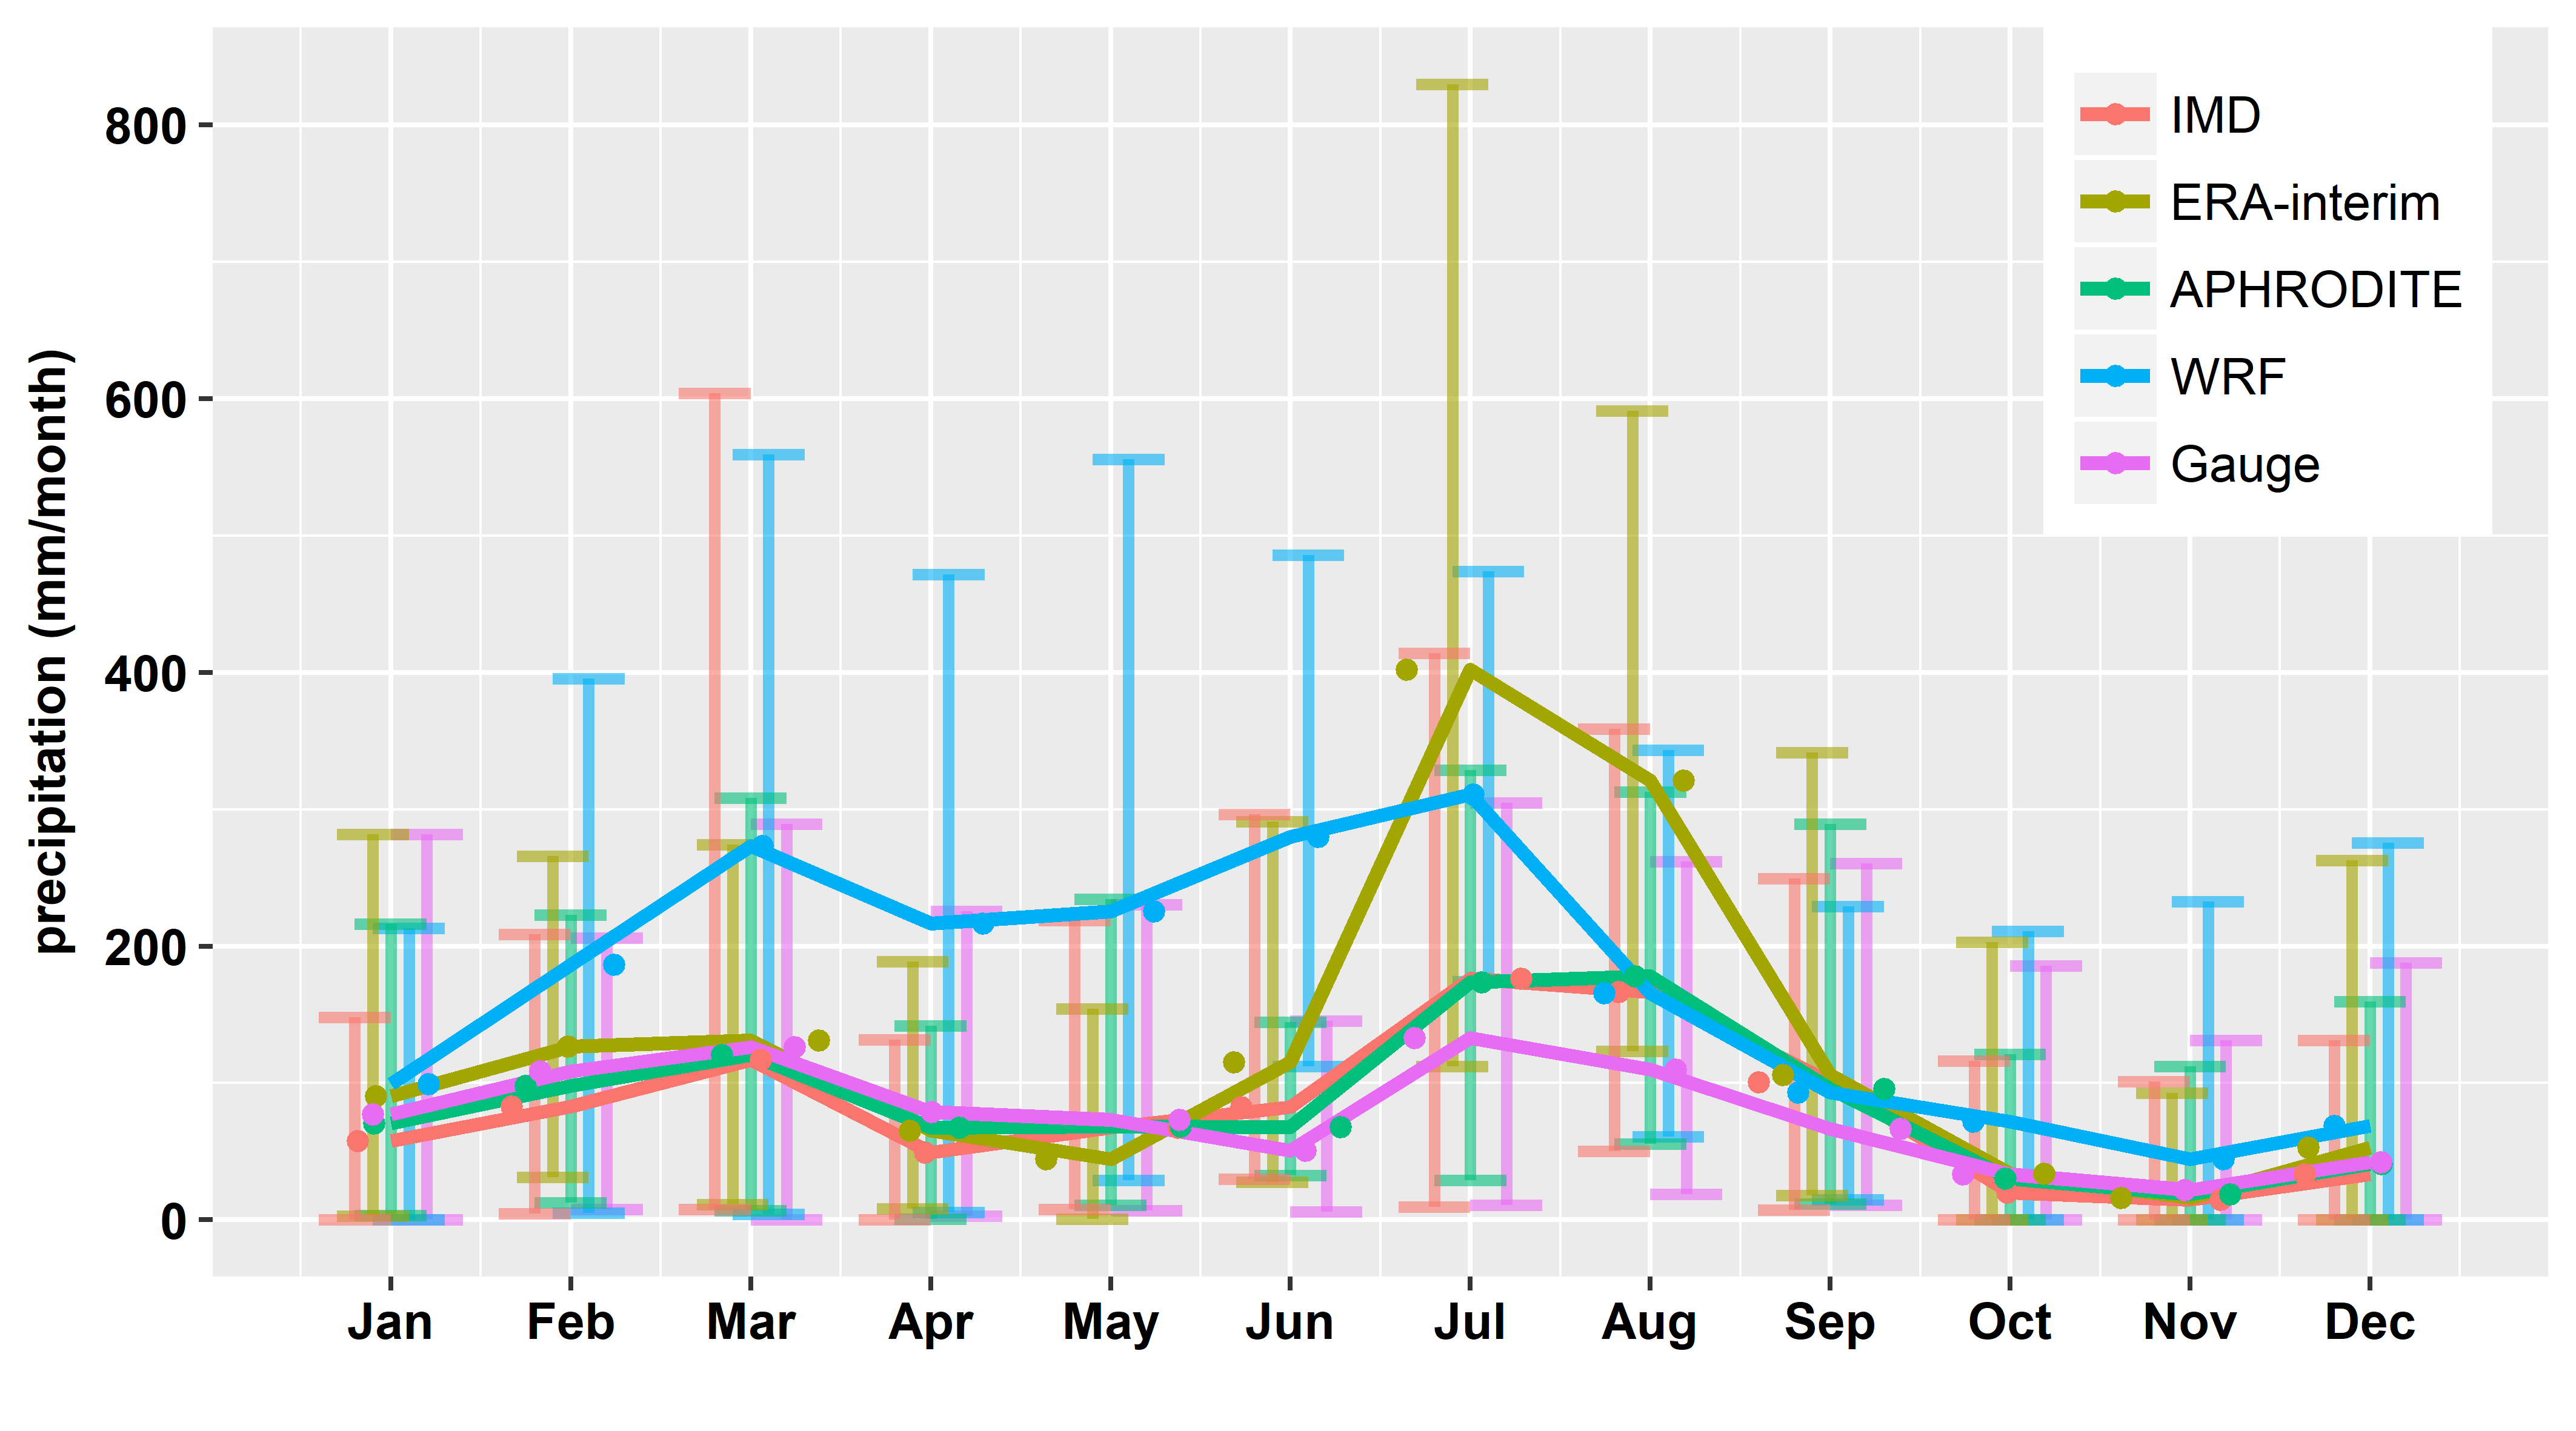

Supplement: Supplementary file 1 [file hess-22-5097-2018-supplement.zip › fig/Bhuntar_month_pre.png]

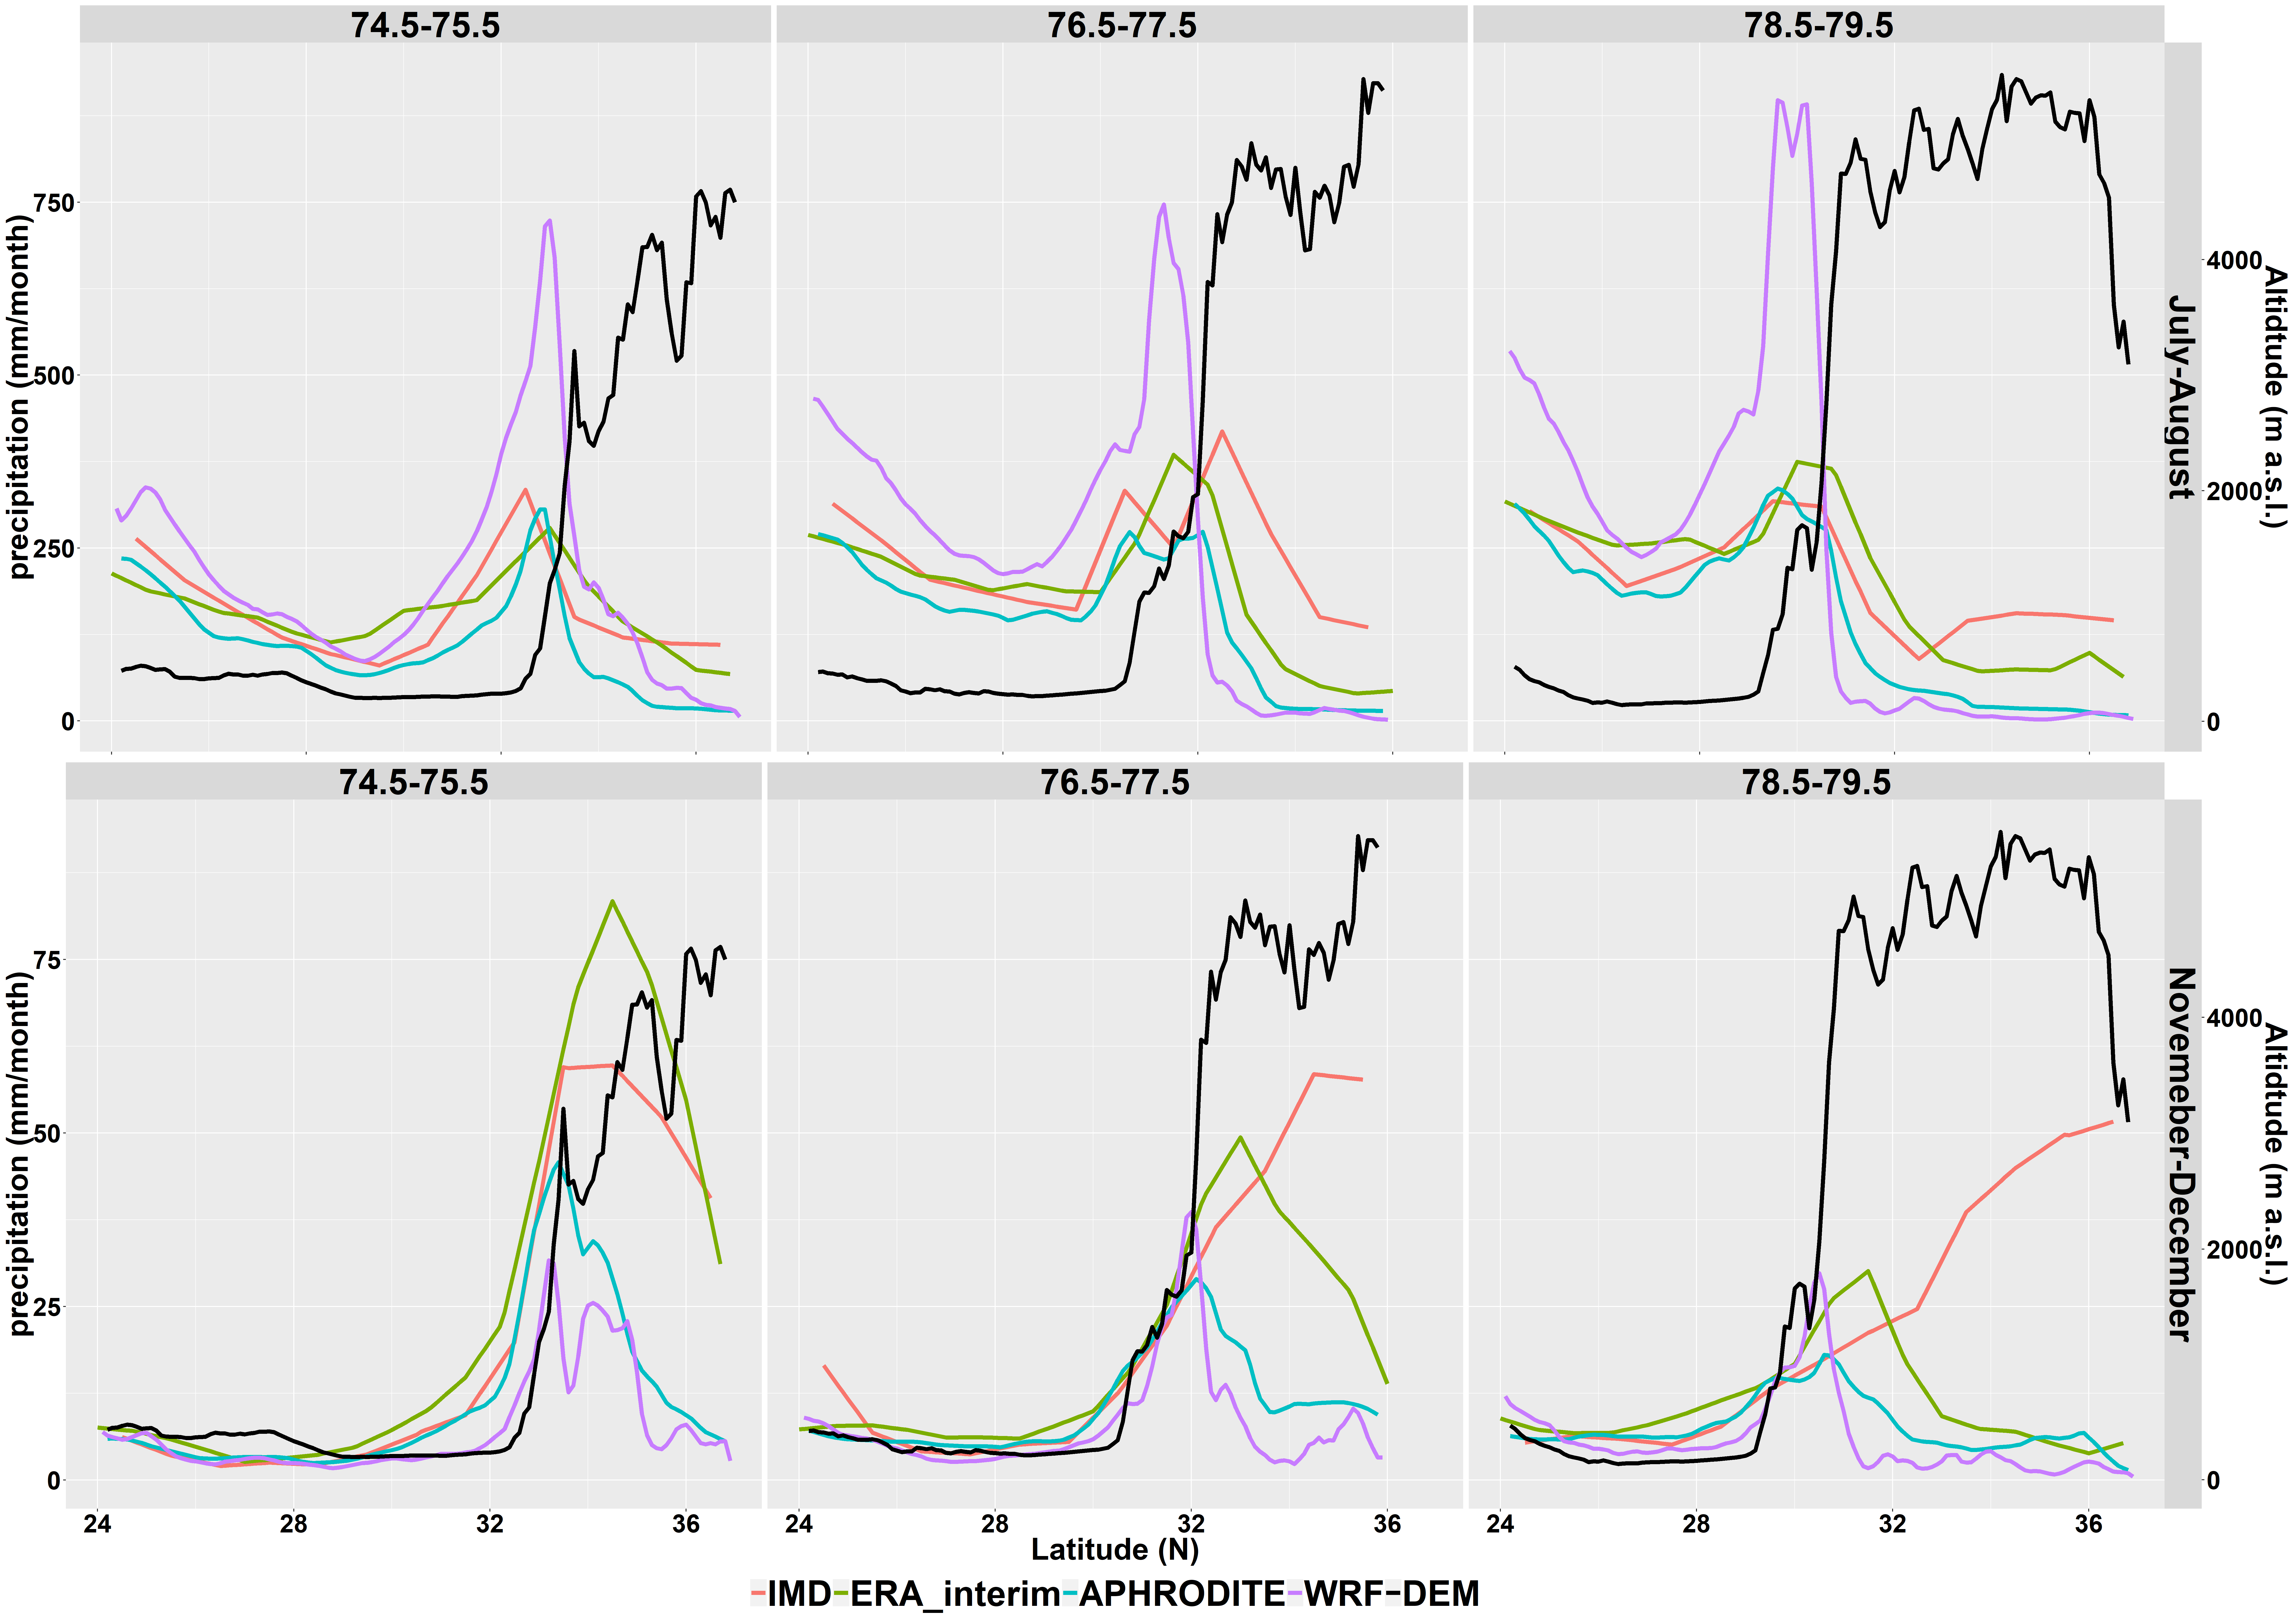

Supplement: Supplementary file 1 [file hess-22-5097-2018-supplement.zip › fig/SmallBox_done.png]

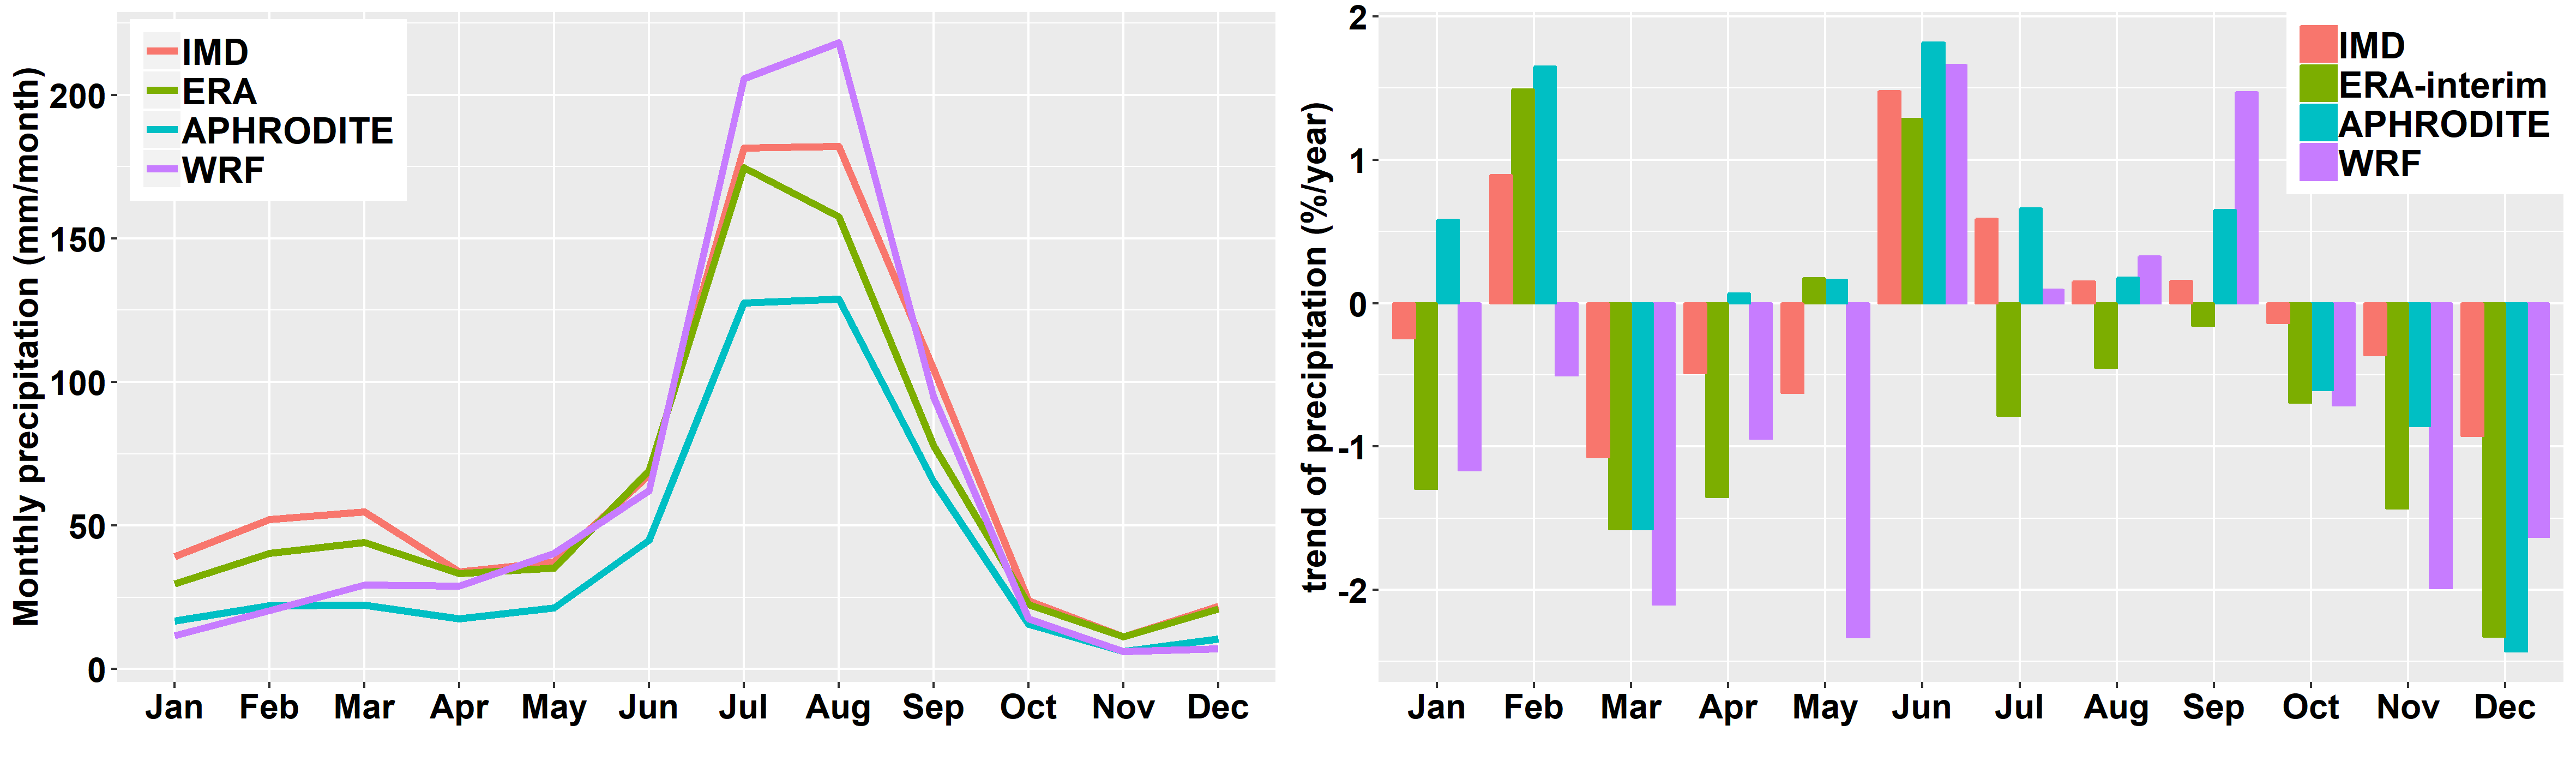

Supplement: Supplementary file 1 [file hess-22-5097-2018-supplement.zip › fig/MonPrec.png]

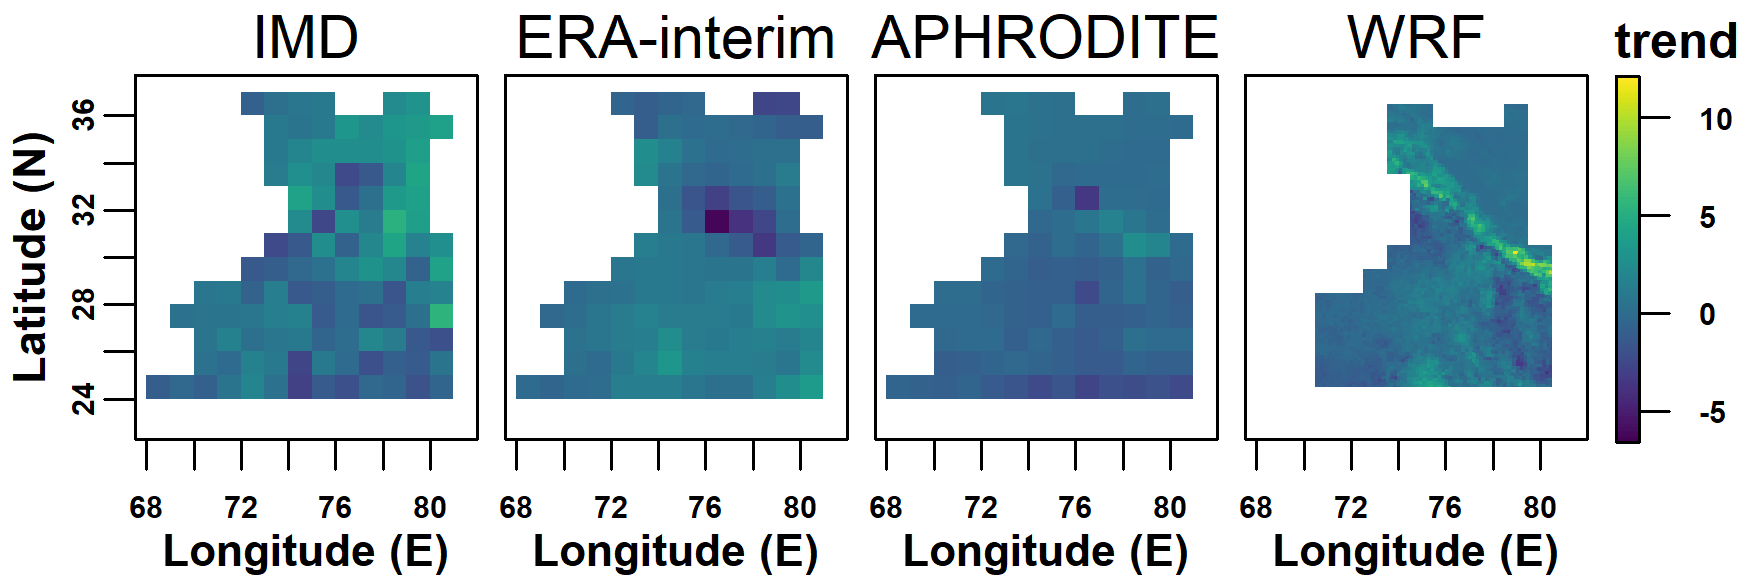

Supplement: Supplementary file 1 [file hess-22-5097-2018-supplement.zip › fig/plot_SumSpatialTrend_done.png]

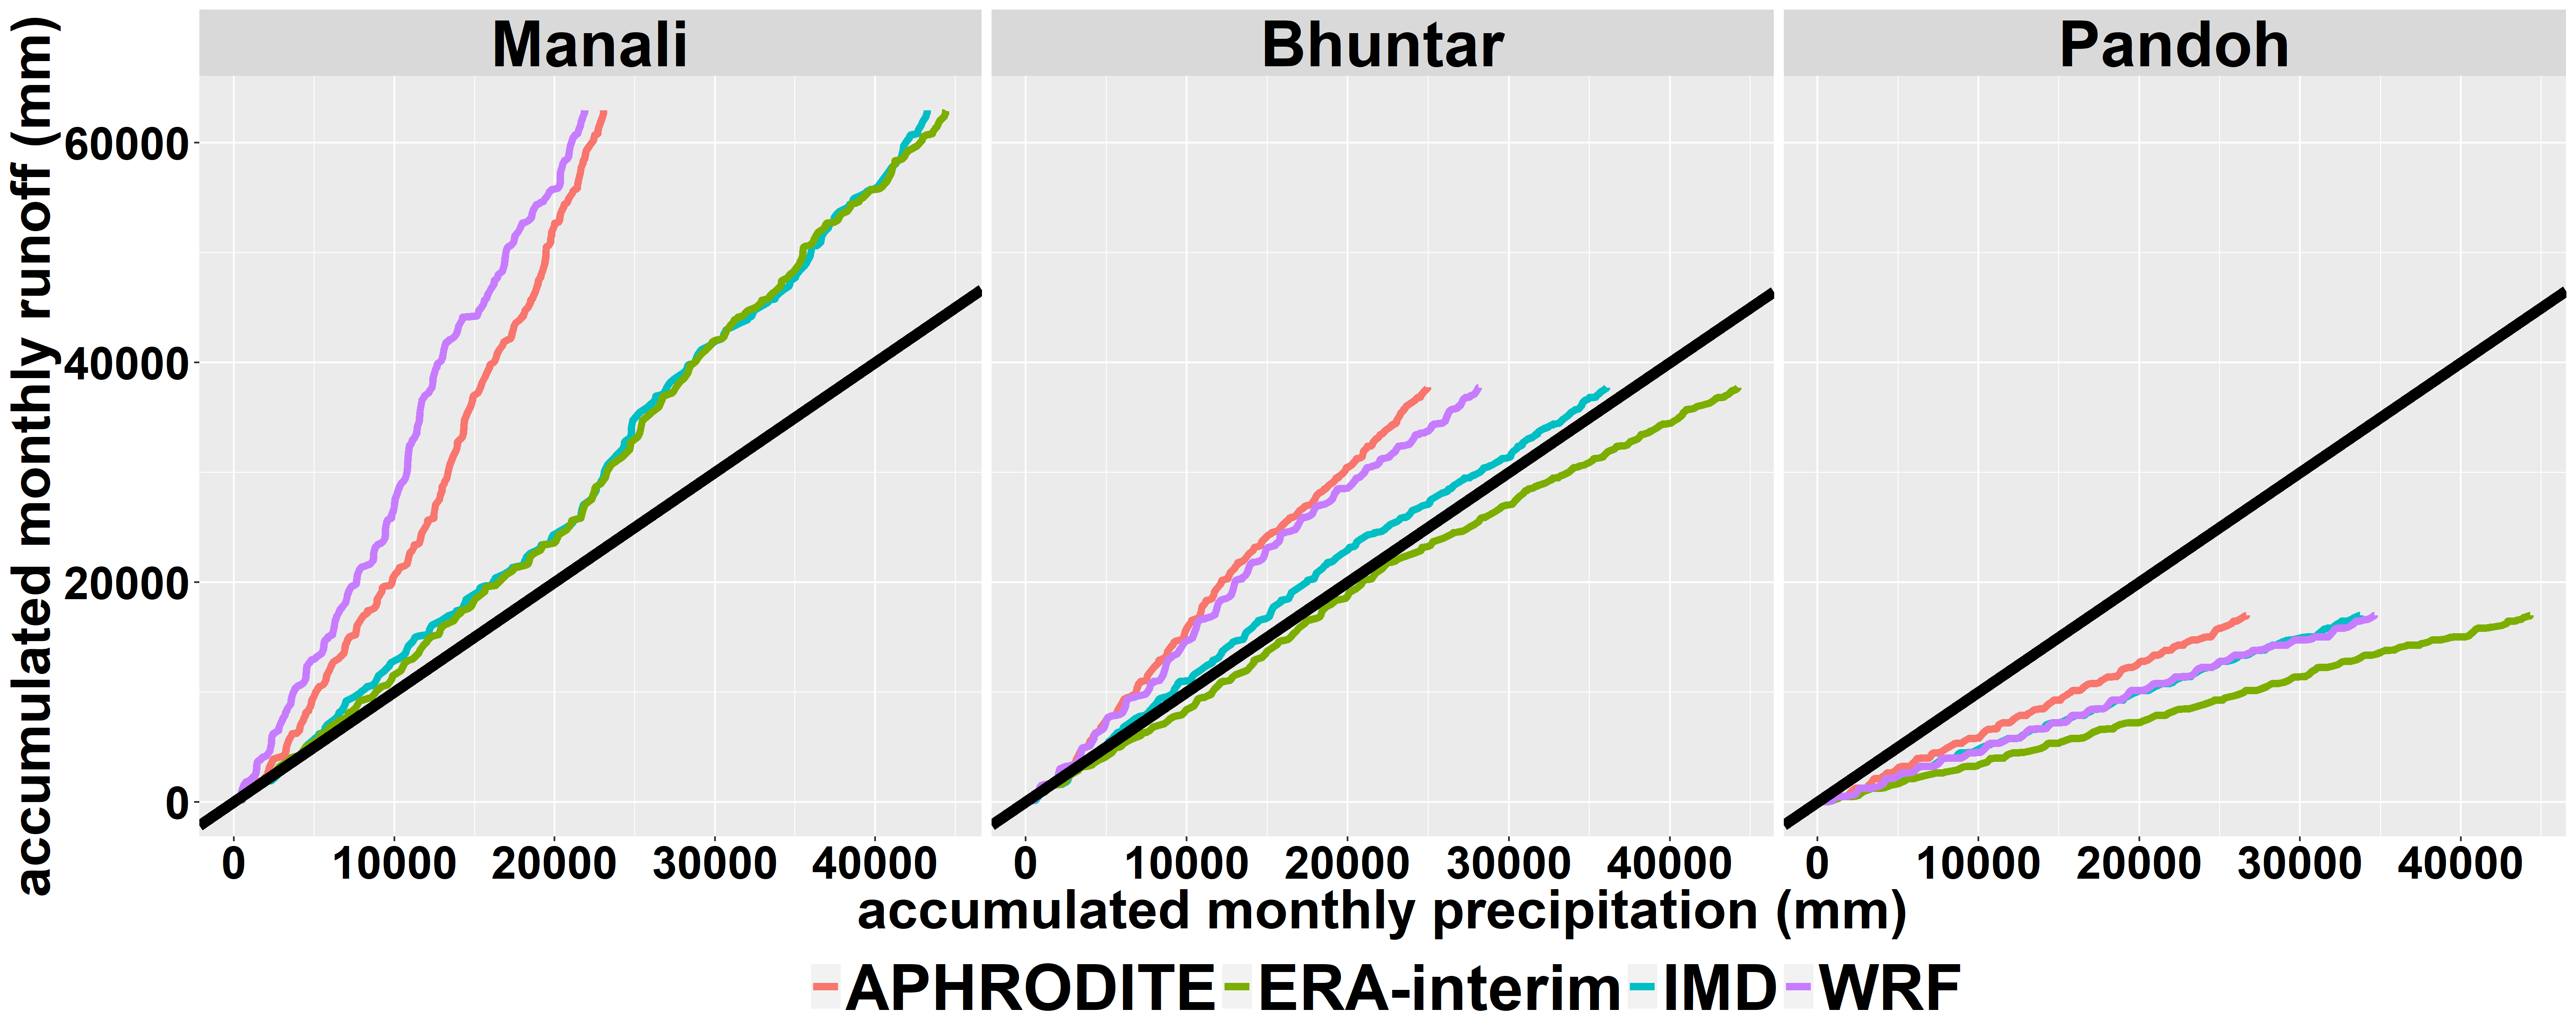

Supplement: Supplementary file 1 [file hess-22-5097-2018-supplement.zip › fig/acc_prec_disc.png]

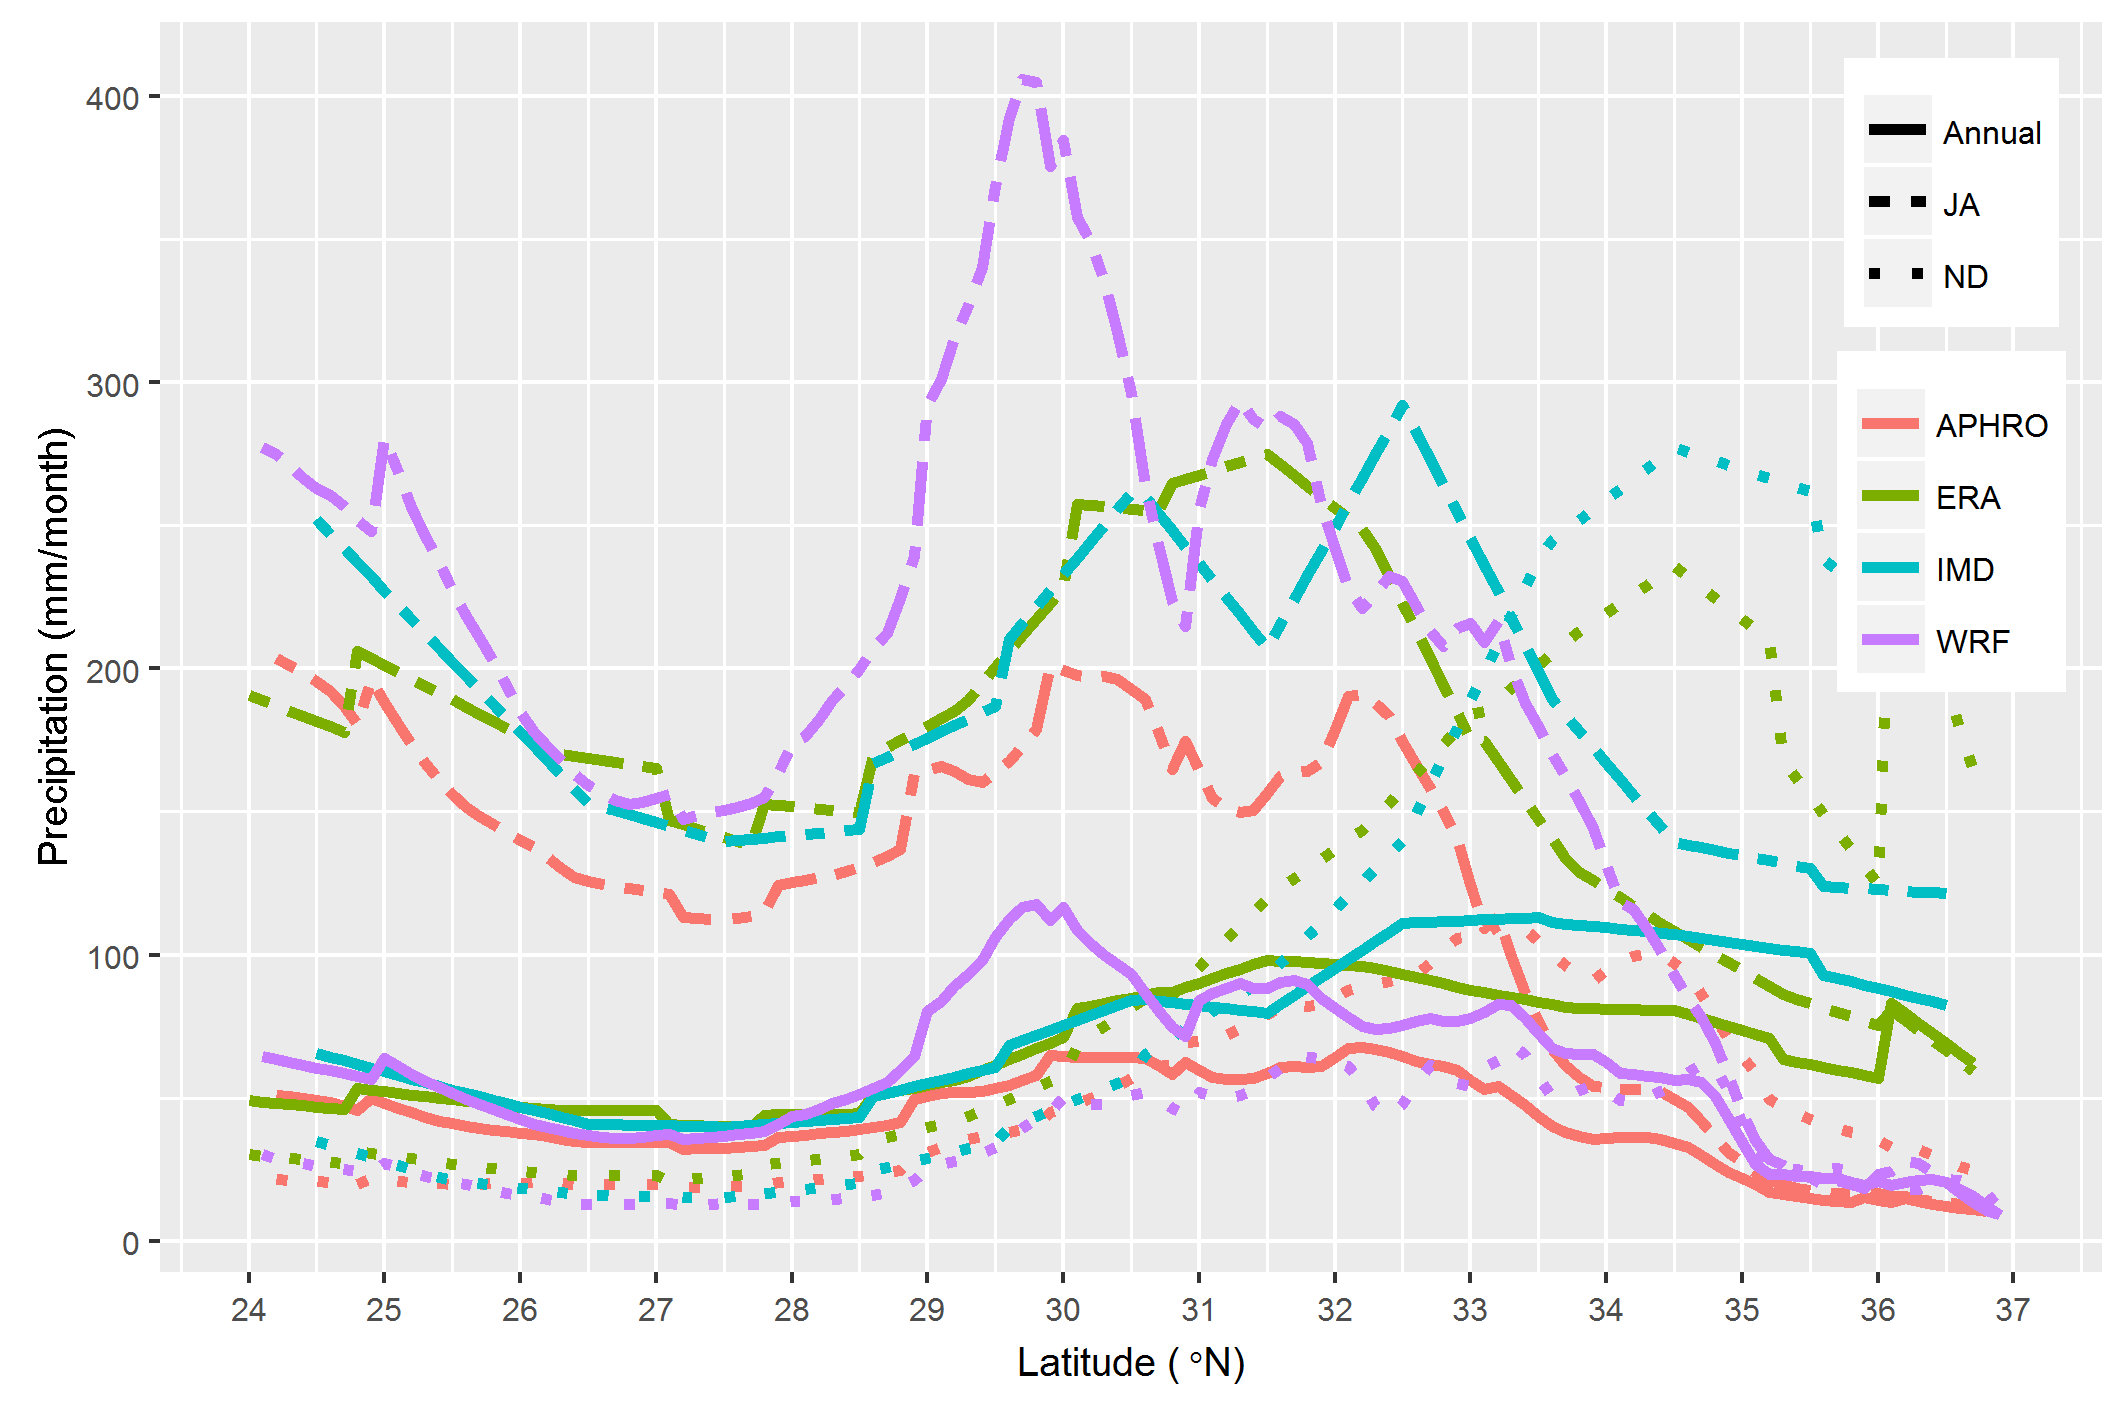

Supplement: Supplementary file 1 [file hess-22-5097-2018-supplement.zip › fig/zon.png]

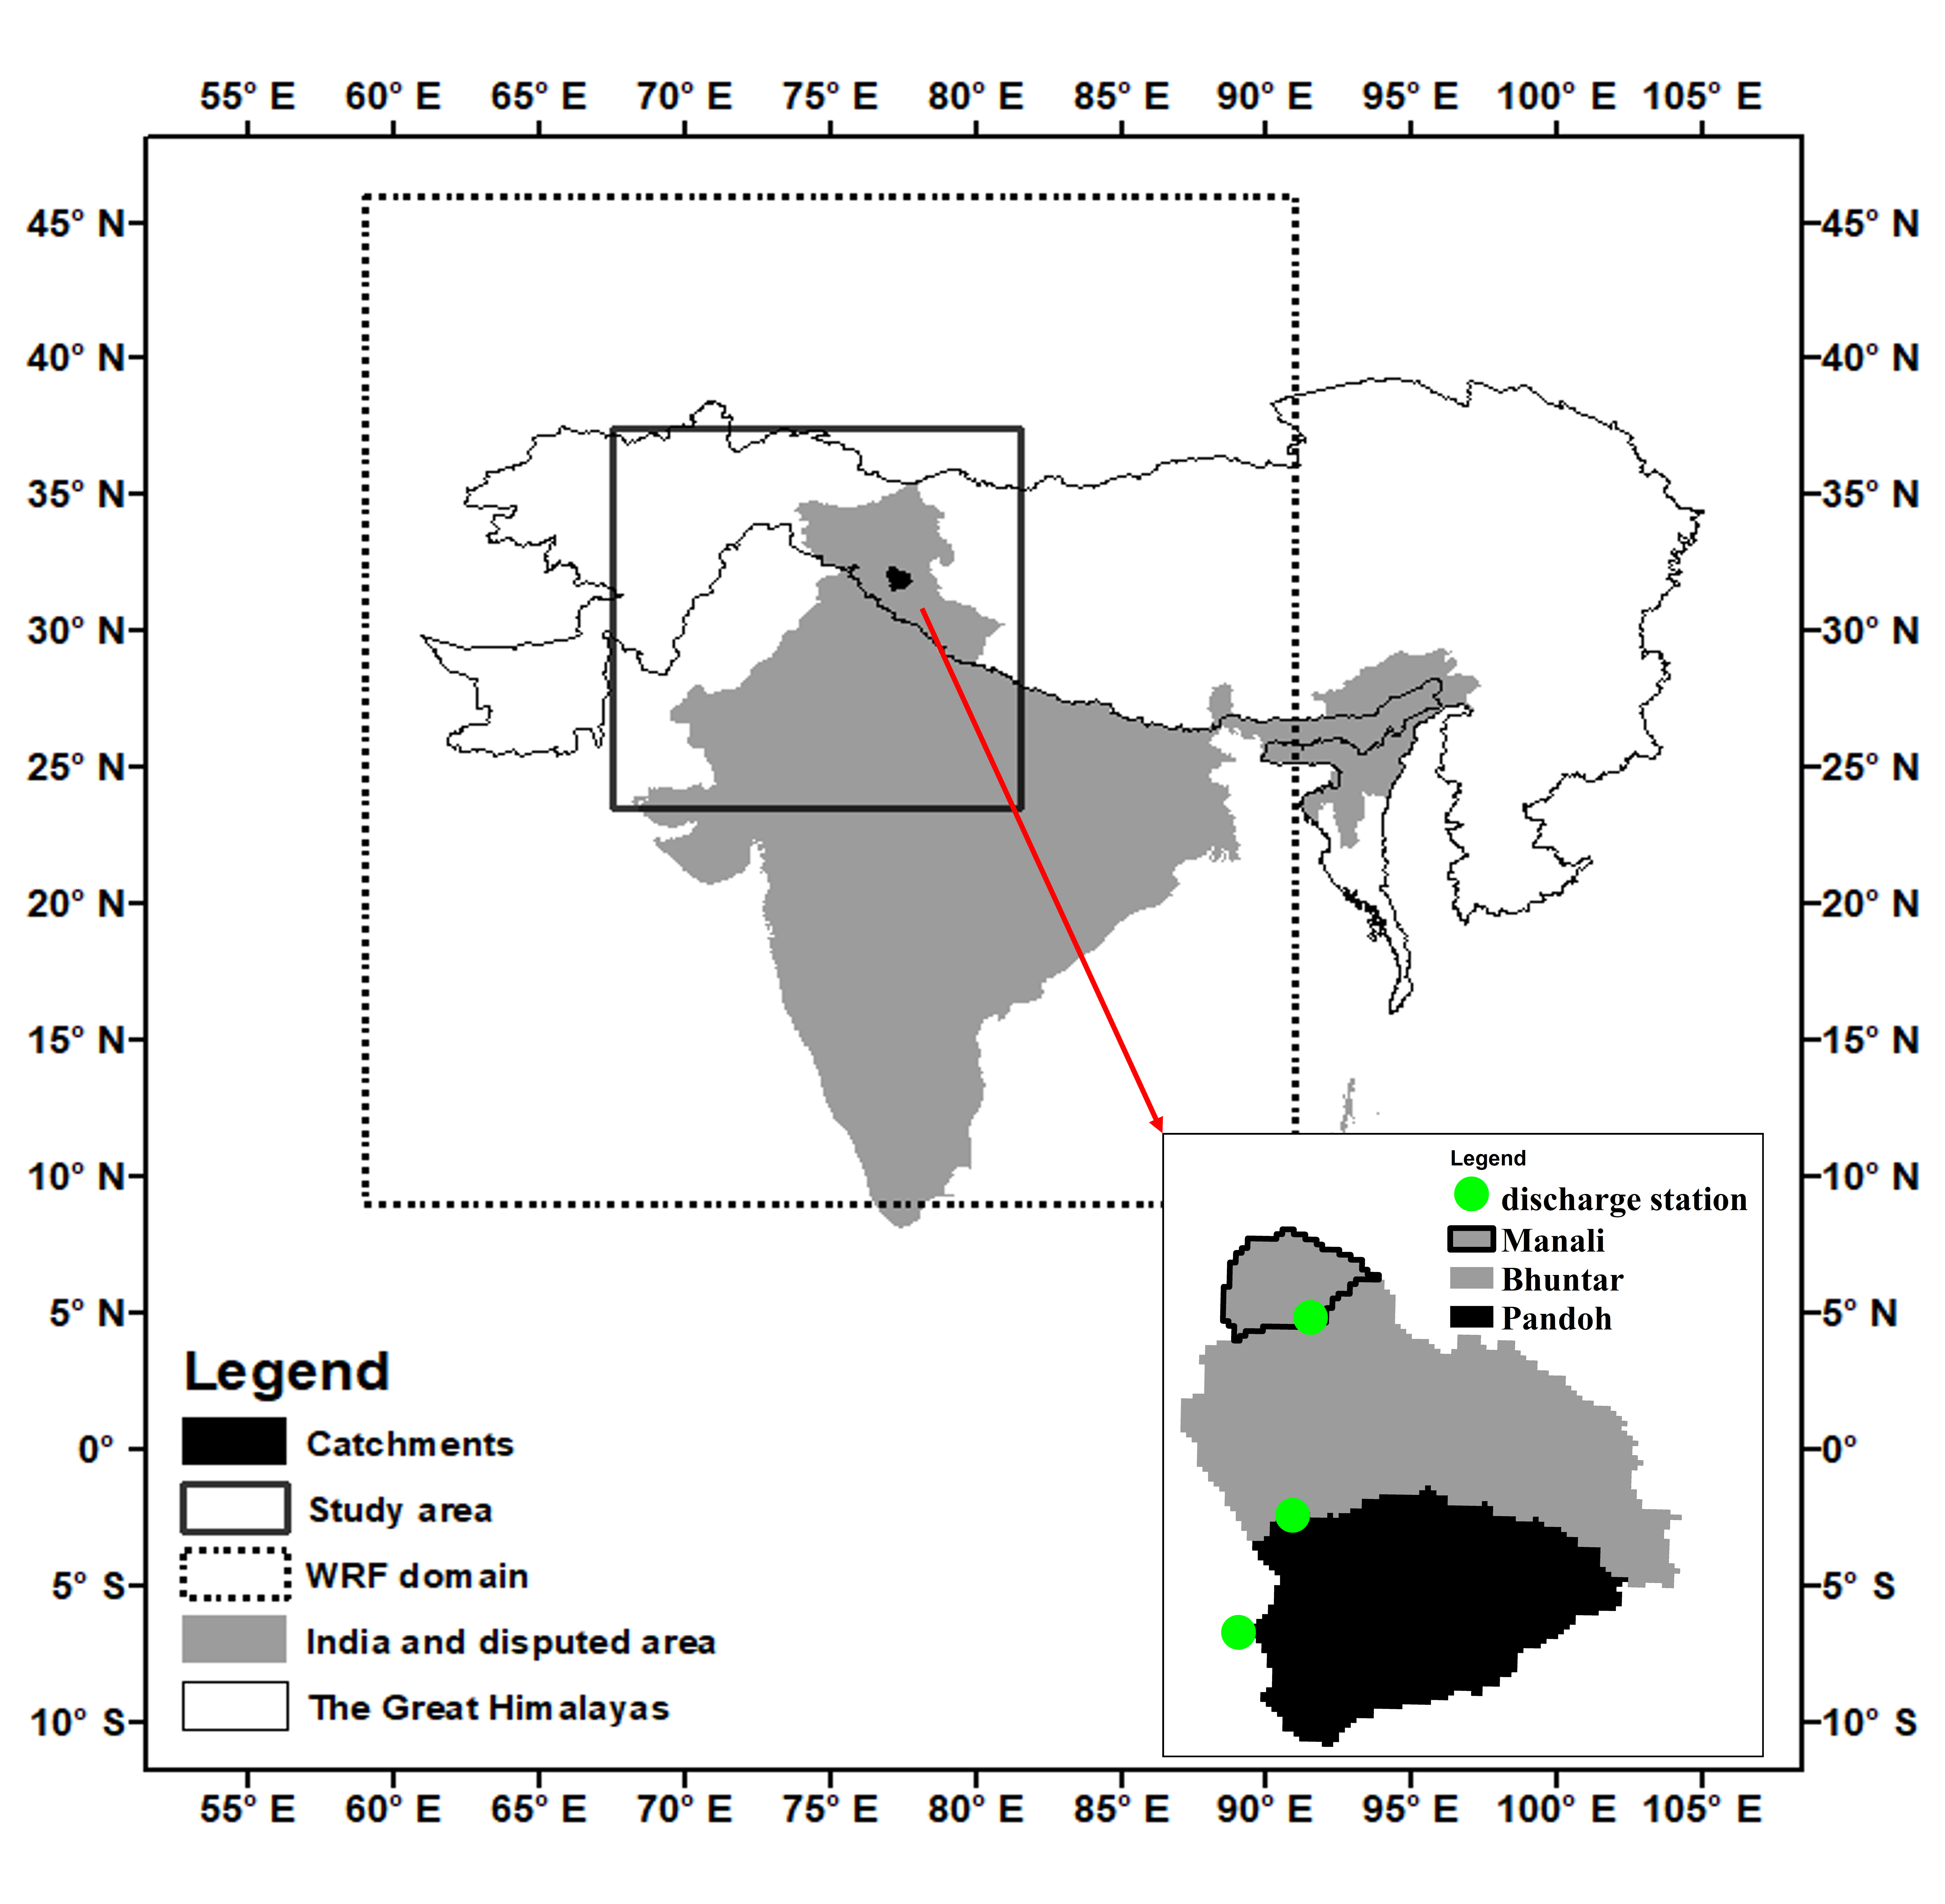

Supplement: Supplementary file 1 [file hess-22-5097-2018-supplement.zip › fig/StudyArea.png]

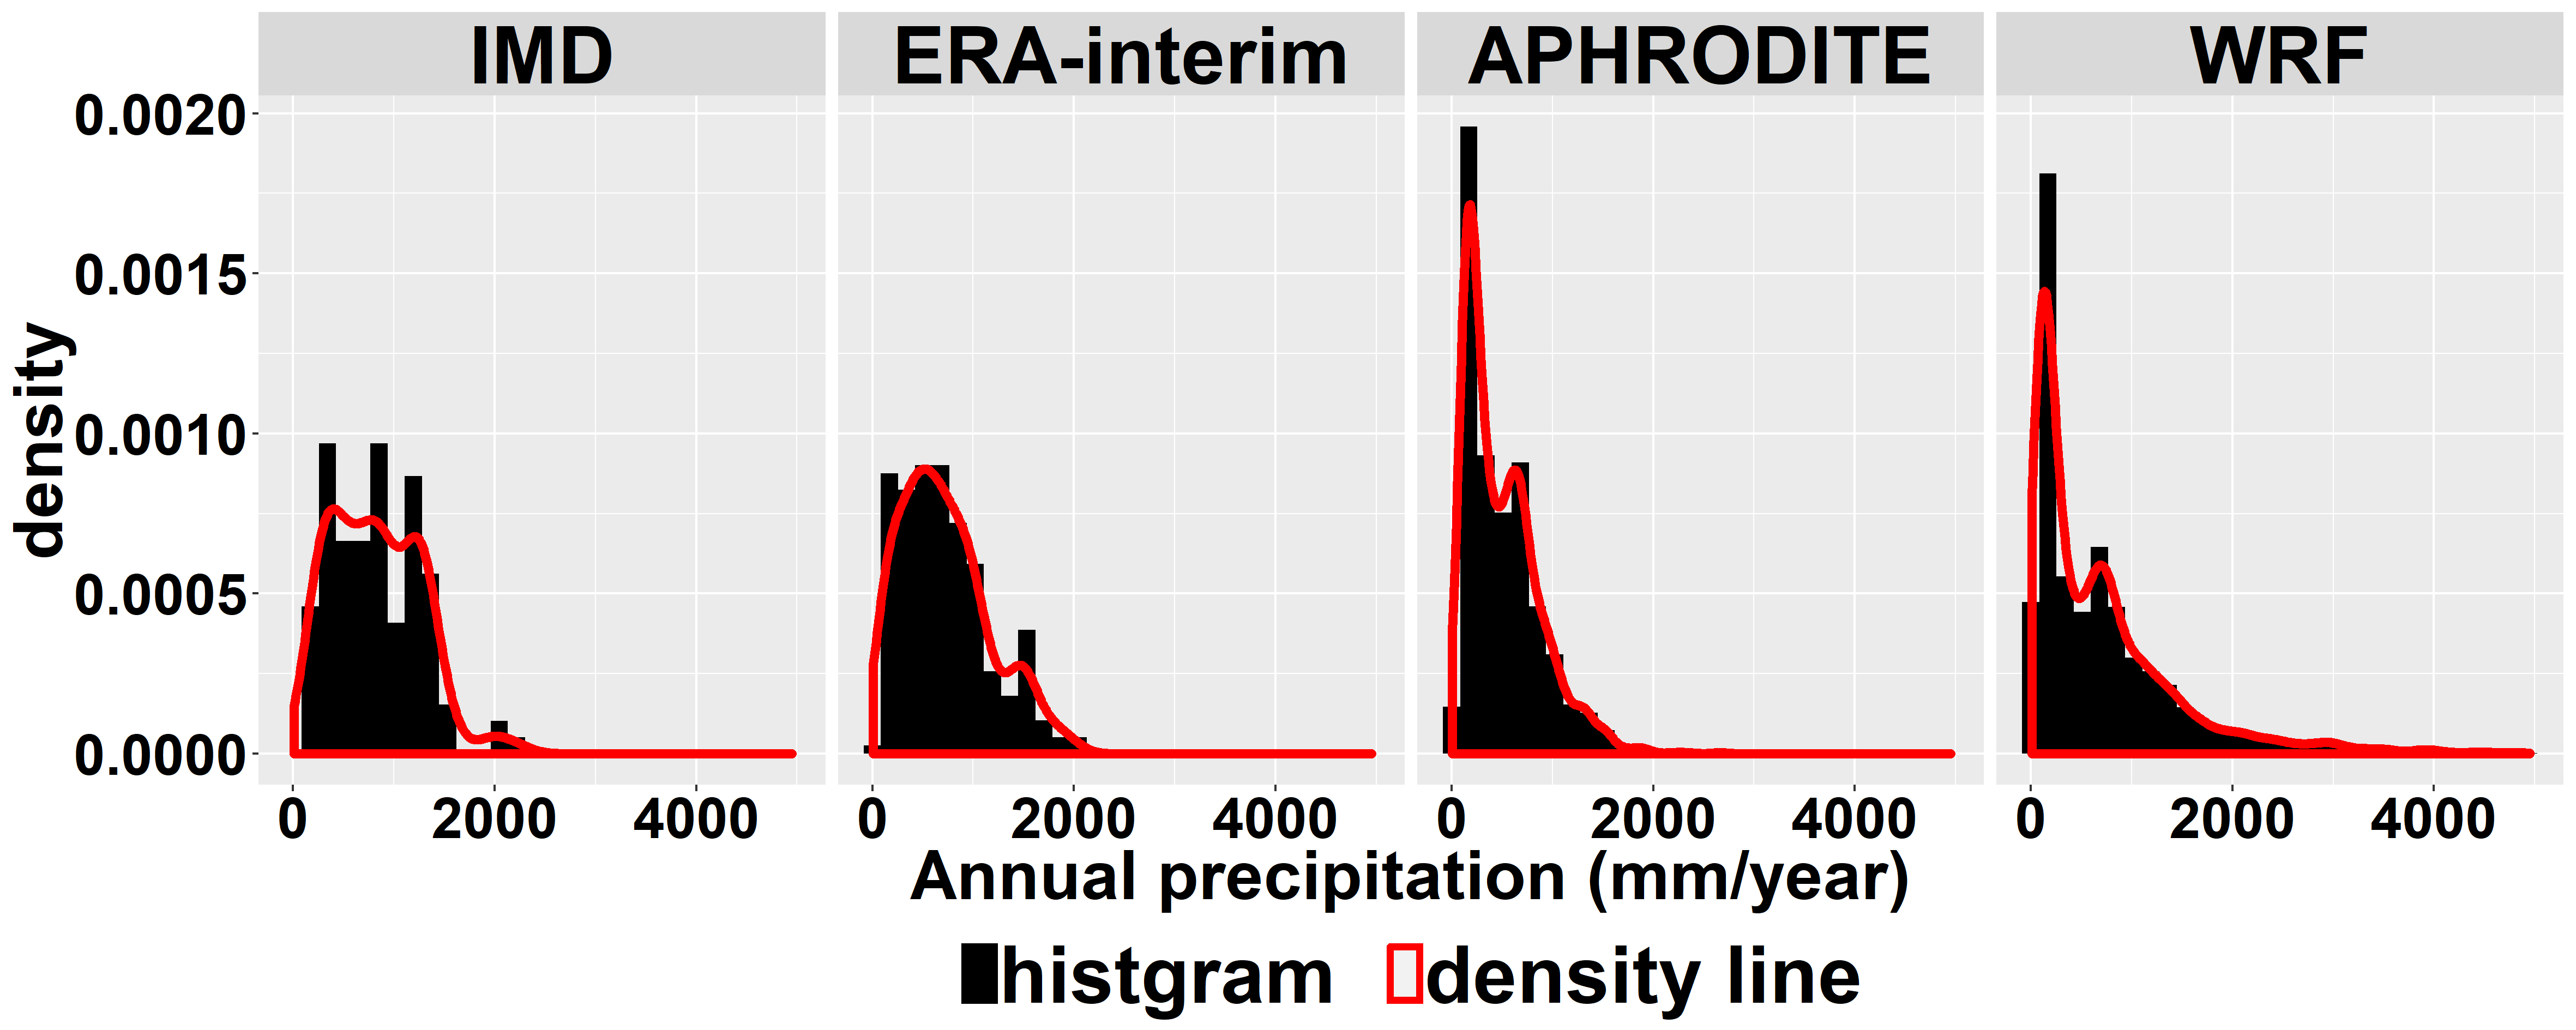

Supplement: Supplementary file 1 [file hess-22-5097-2018-supplement.zip › fig/AnnualPrecipitation_hist.png]

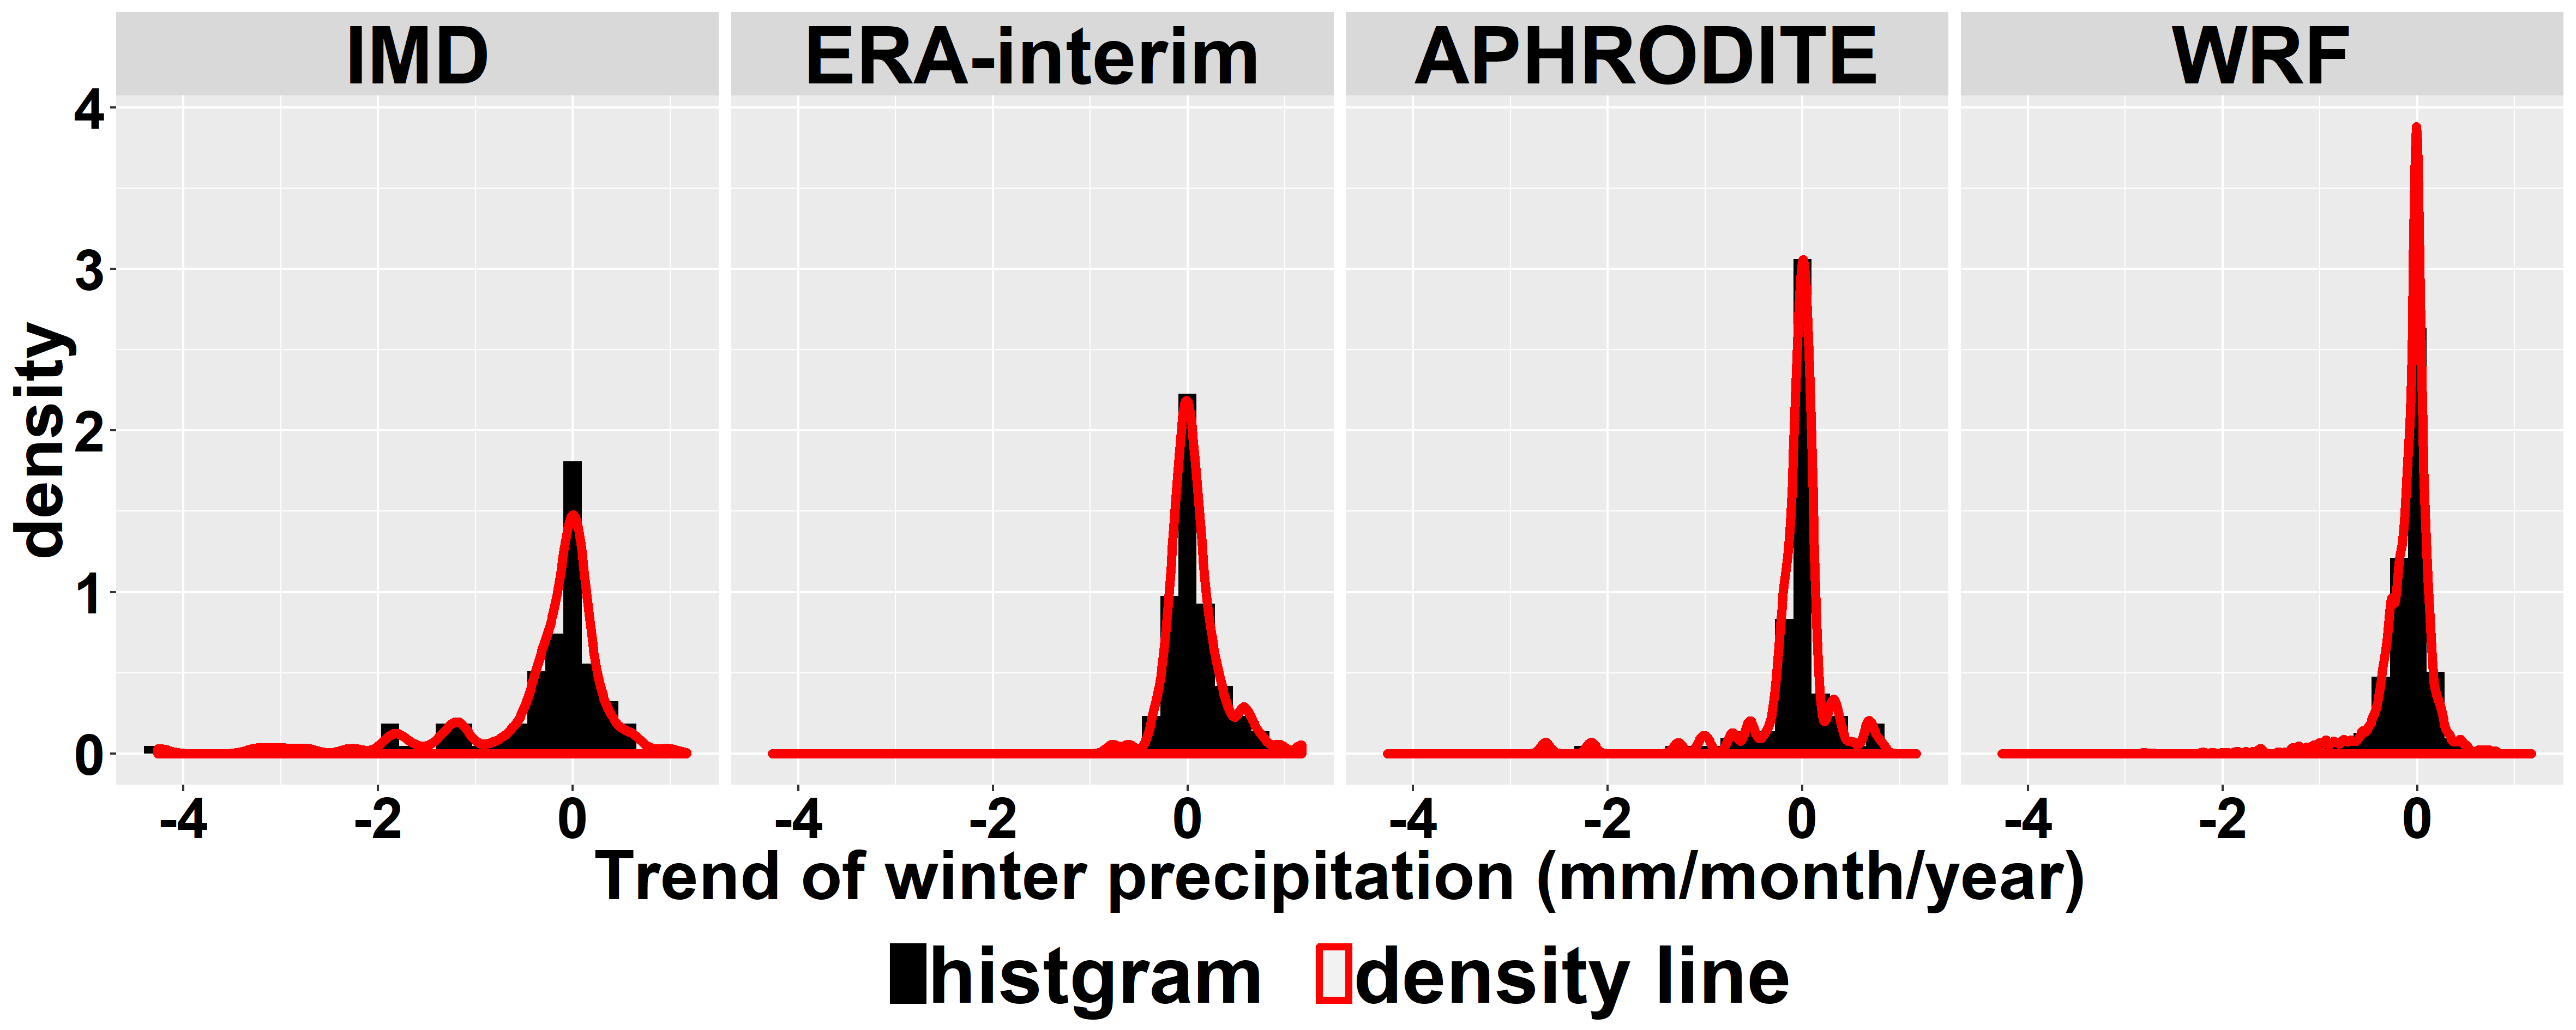

Supplement: Supplementary file 1 [file hess-22-5097-2018-supplement.zip › fig/WinSpatialTrend_hist.png]

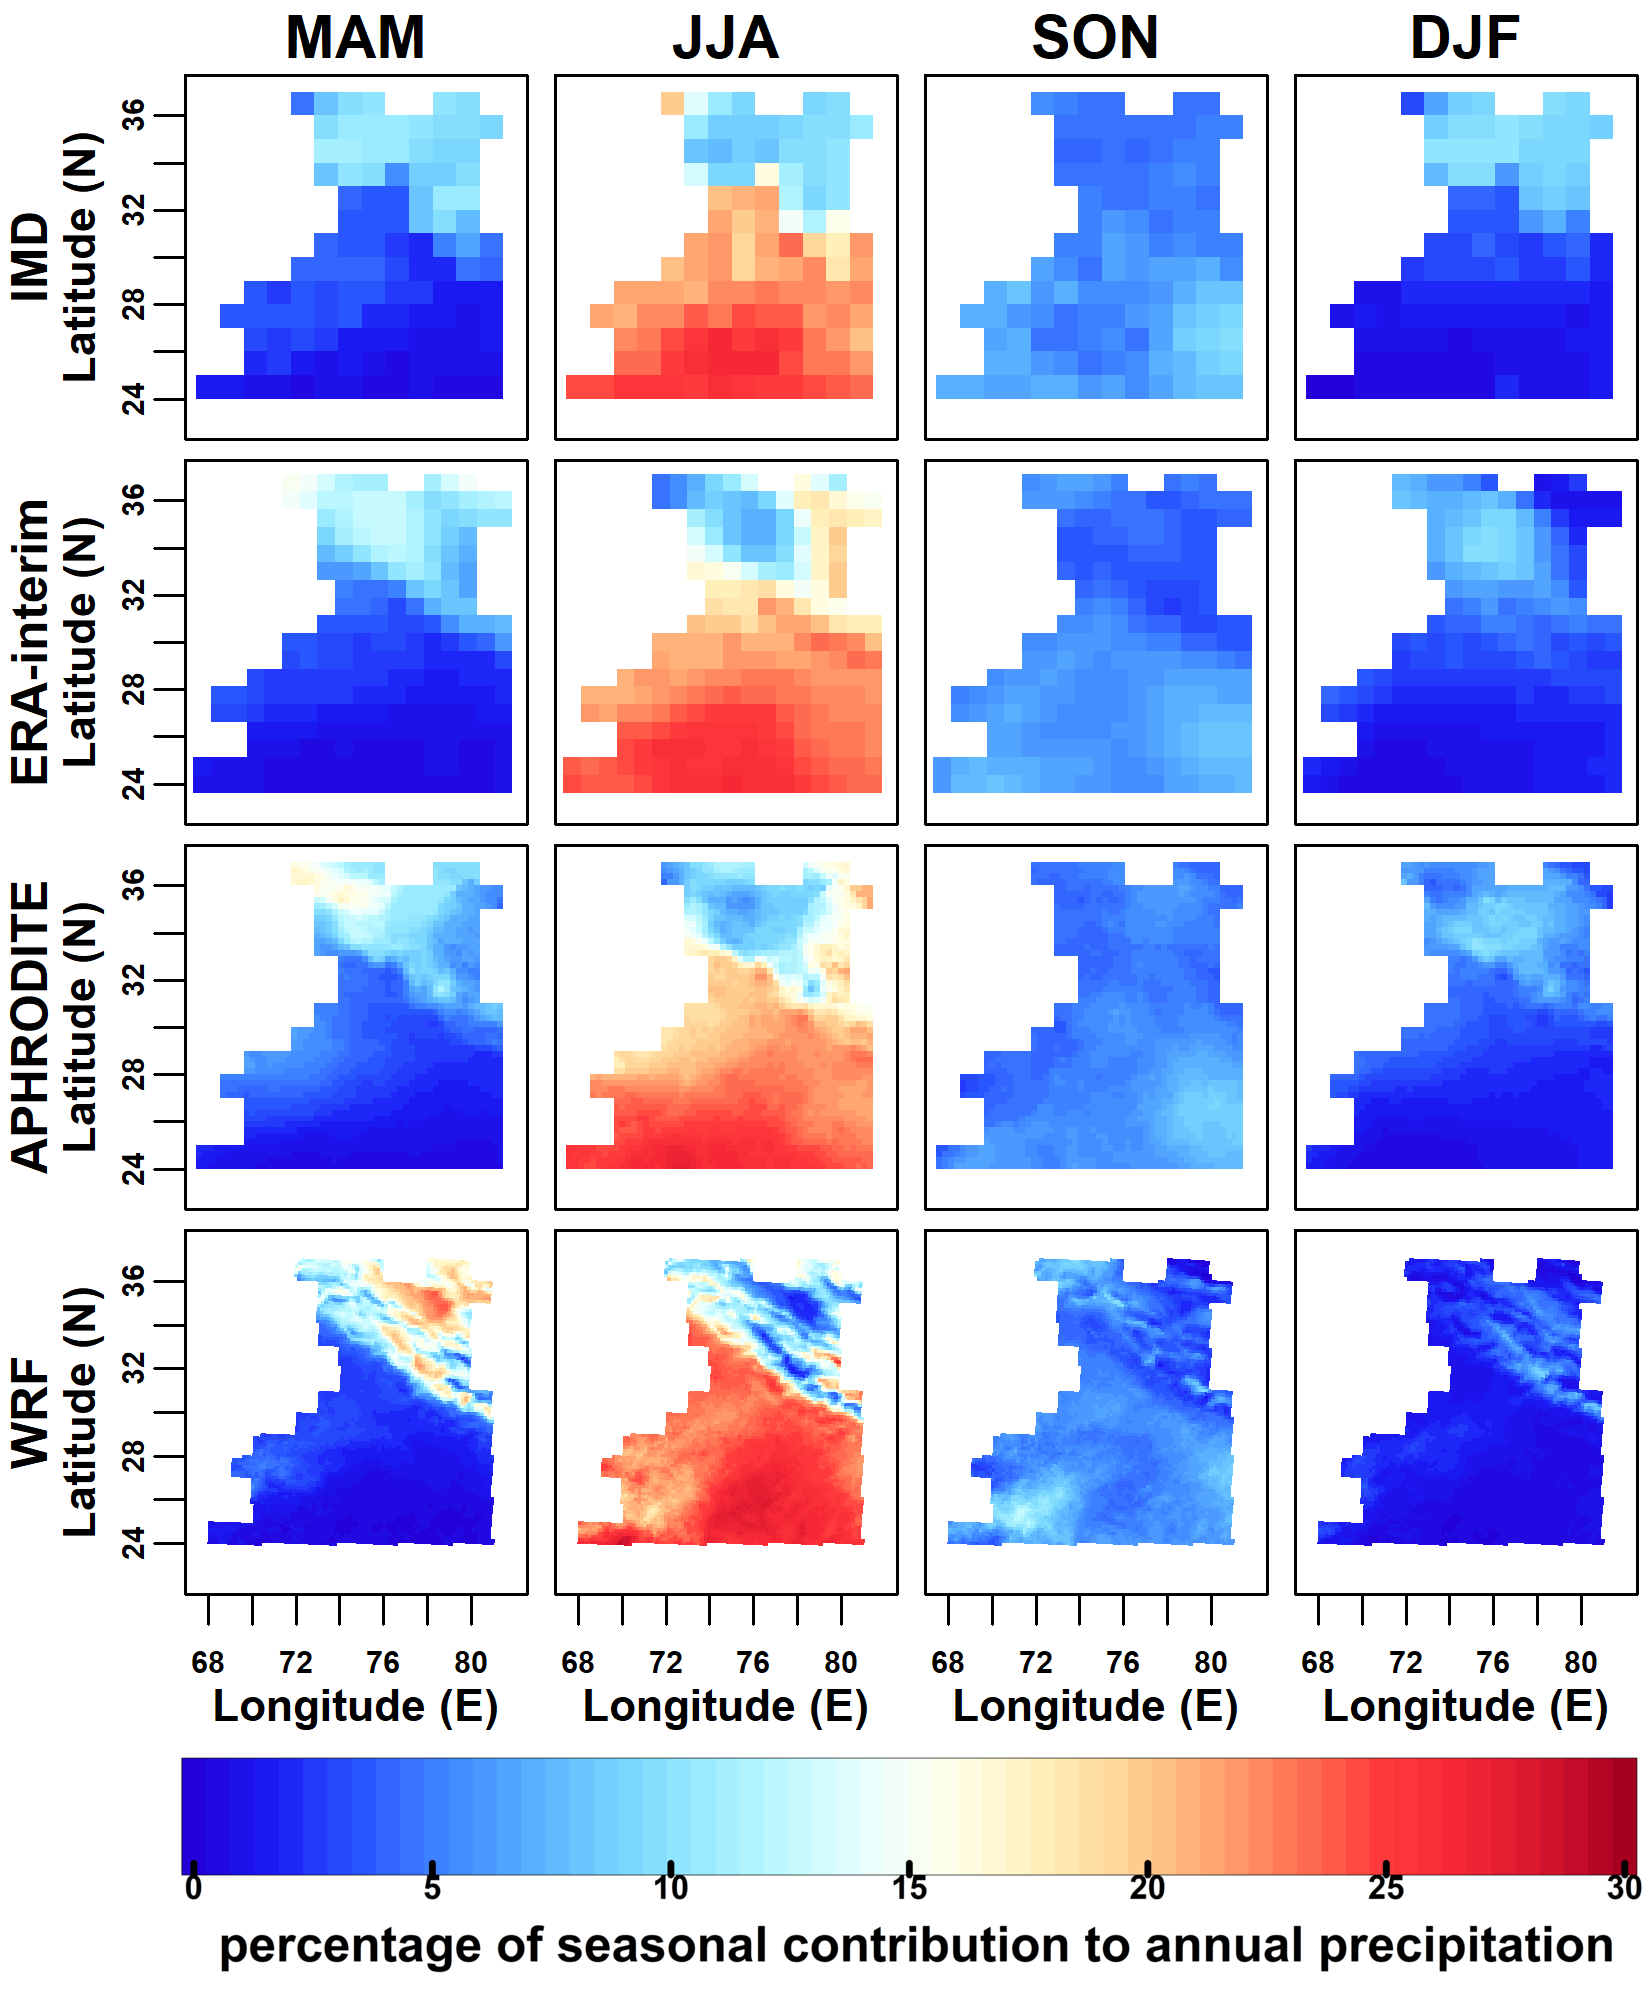

Supplement: Supplementary file 1 [file hess-22-5097-2018-supplement.zip › fig/Tp_SpatialSeason_done.png]

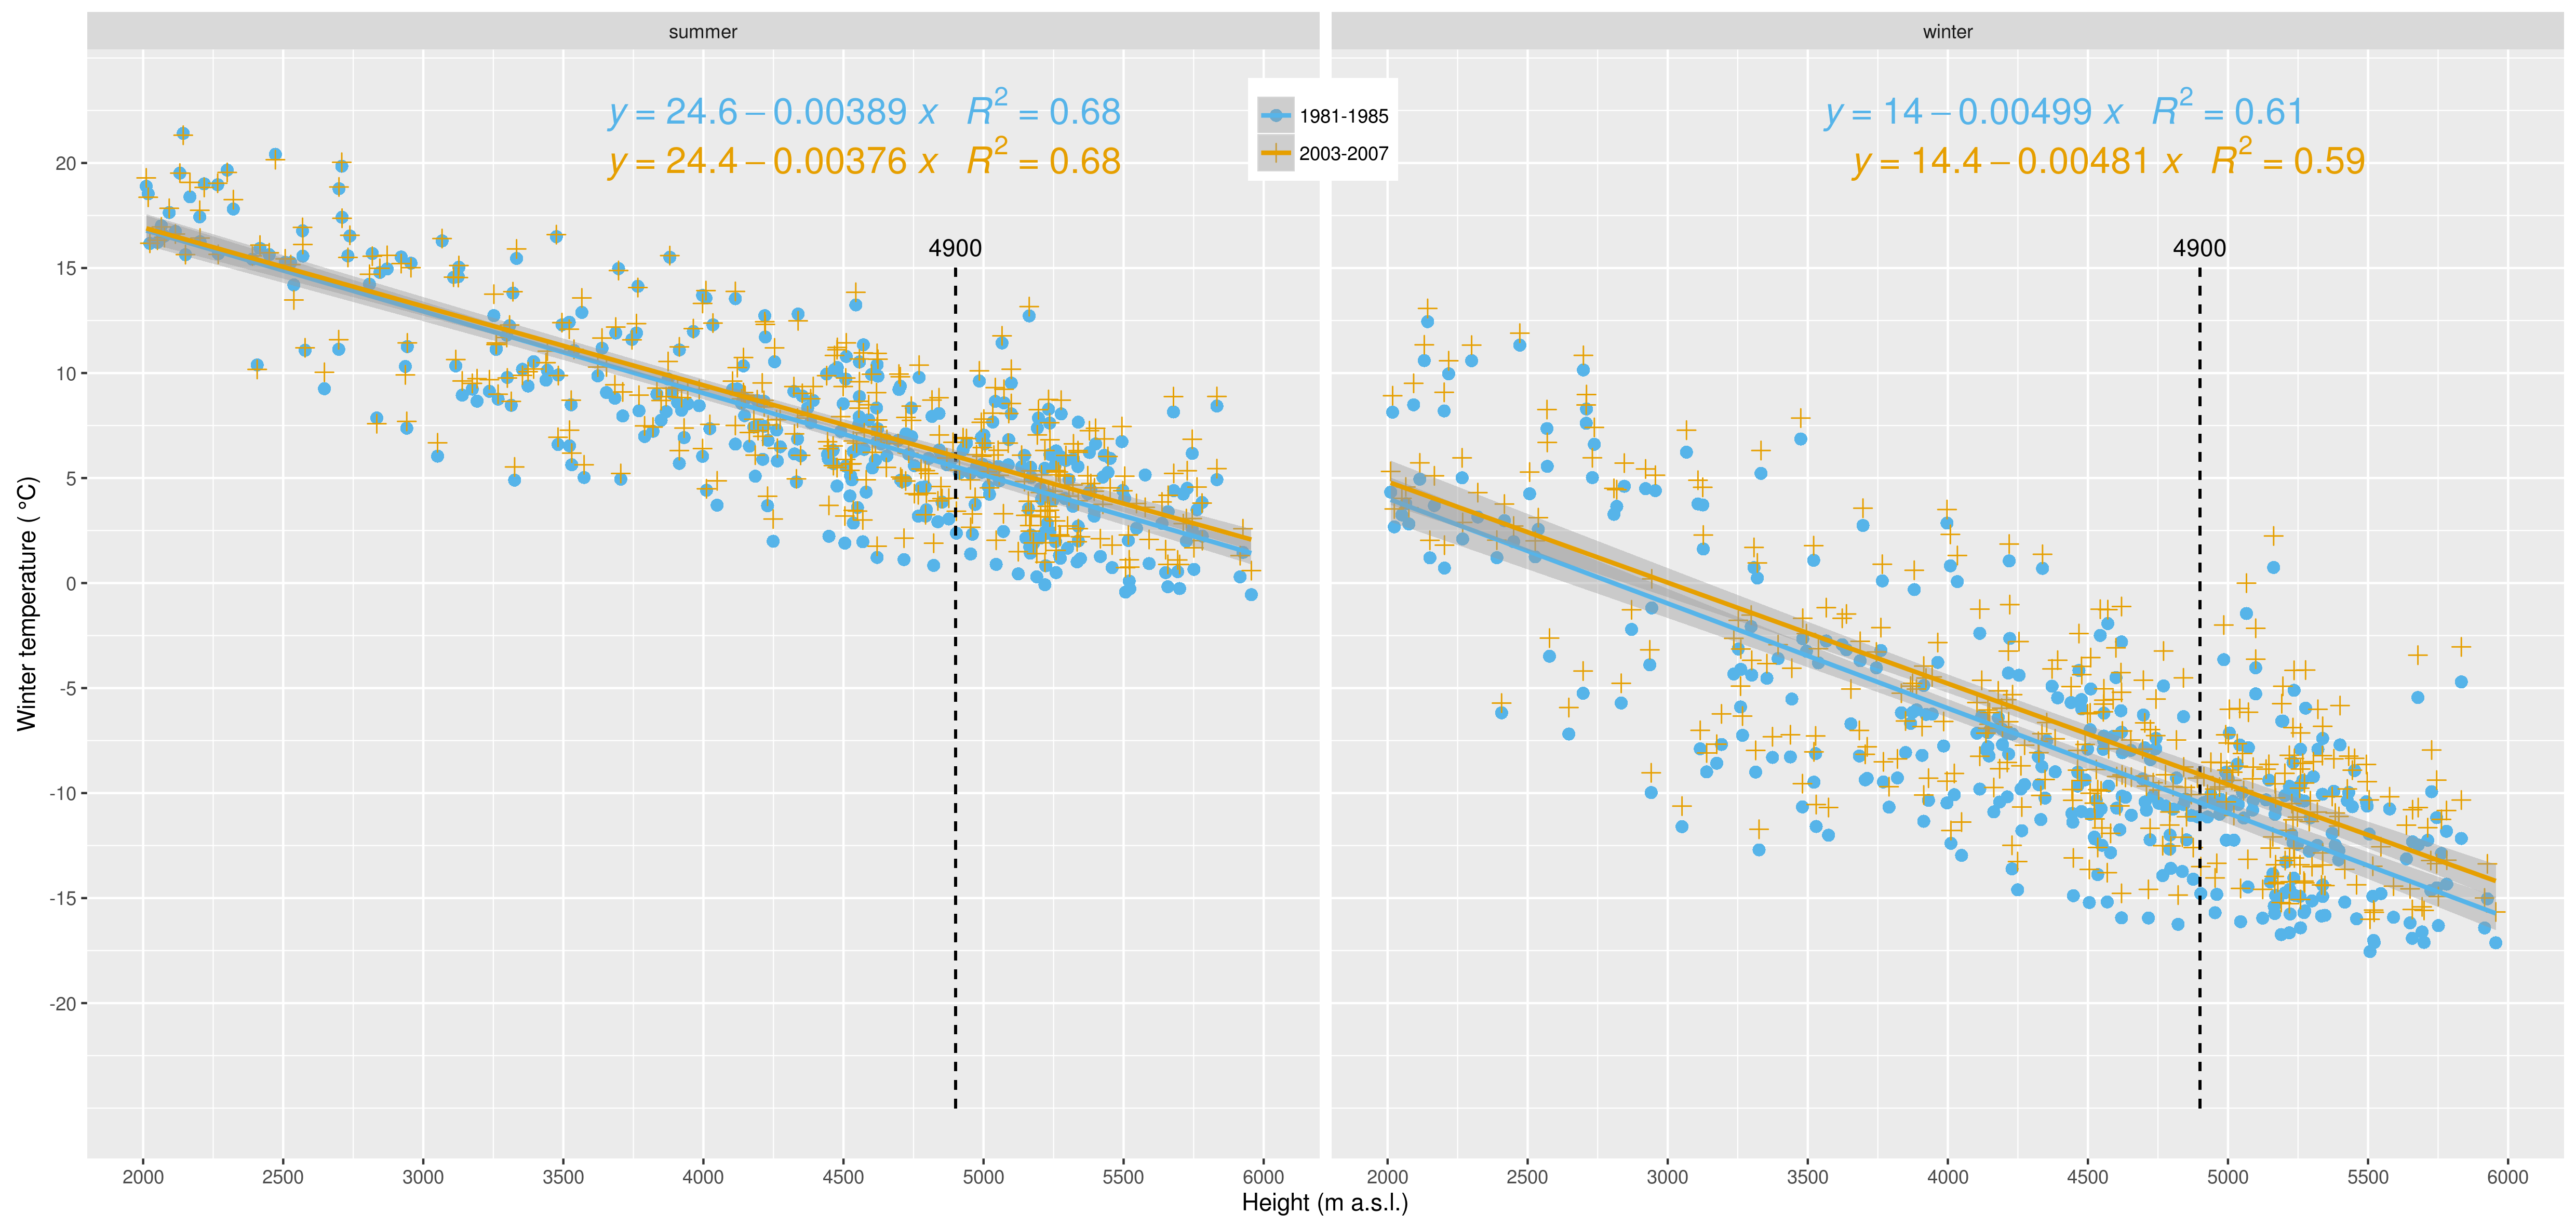

Supplement: Supplementary file 1 [file hess-22-5097-2018-supplement.zip › fig/winterHGT_T2_APHRO.png]

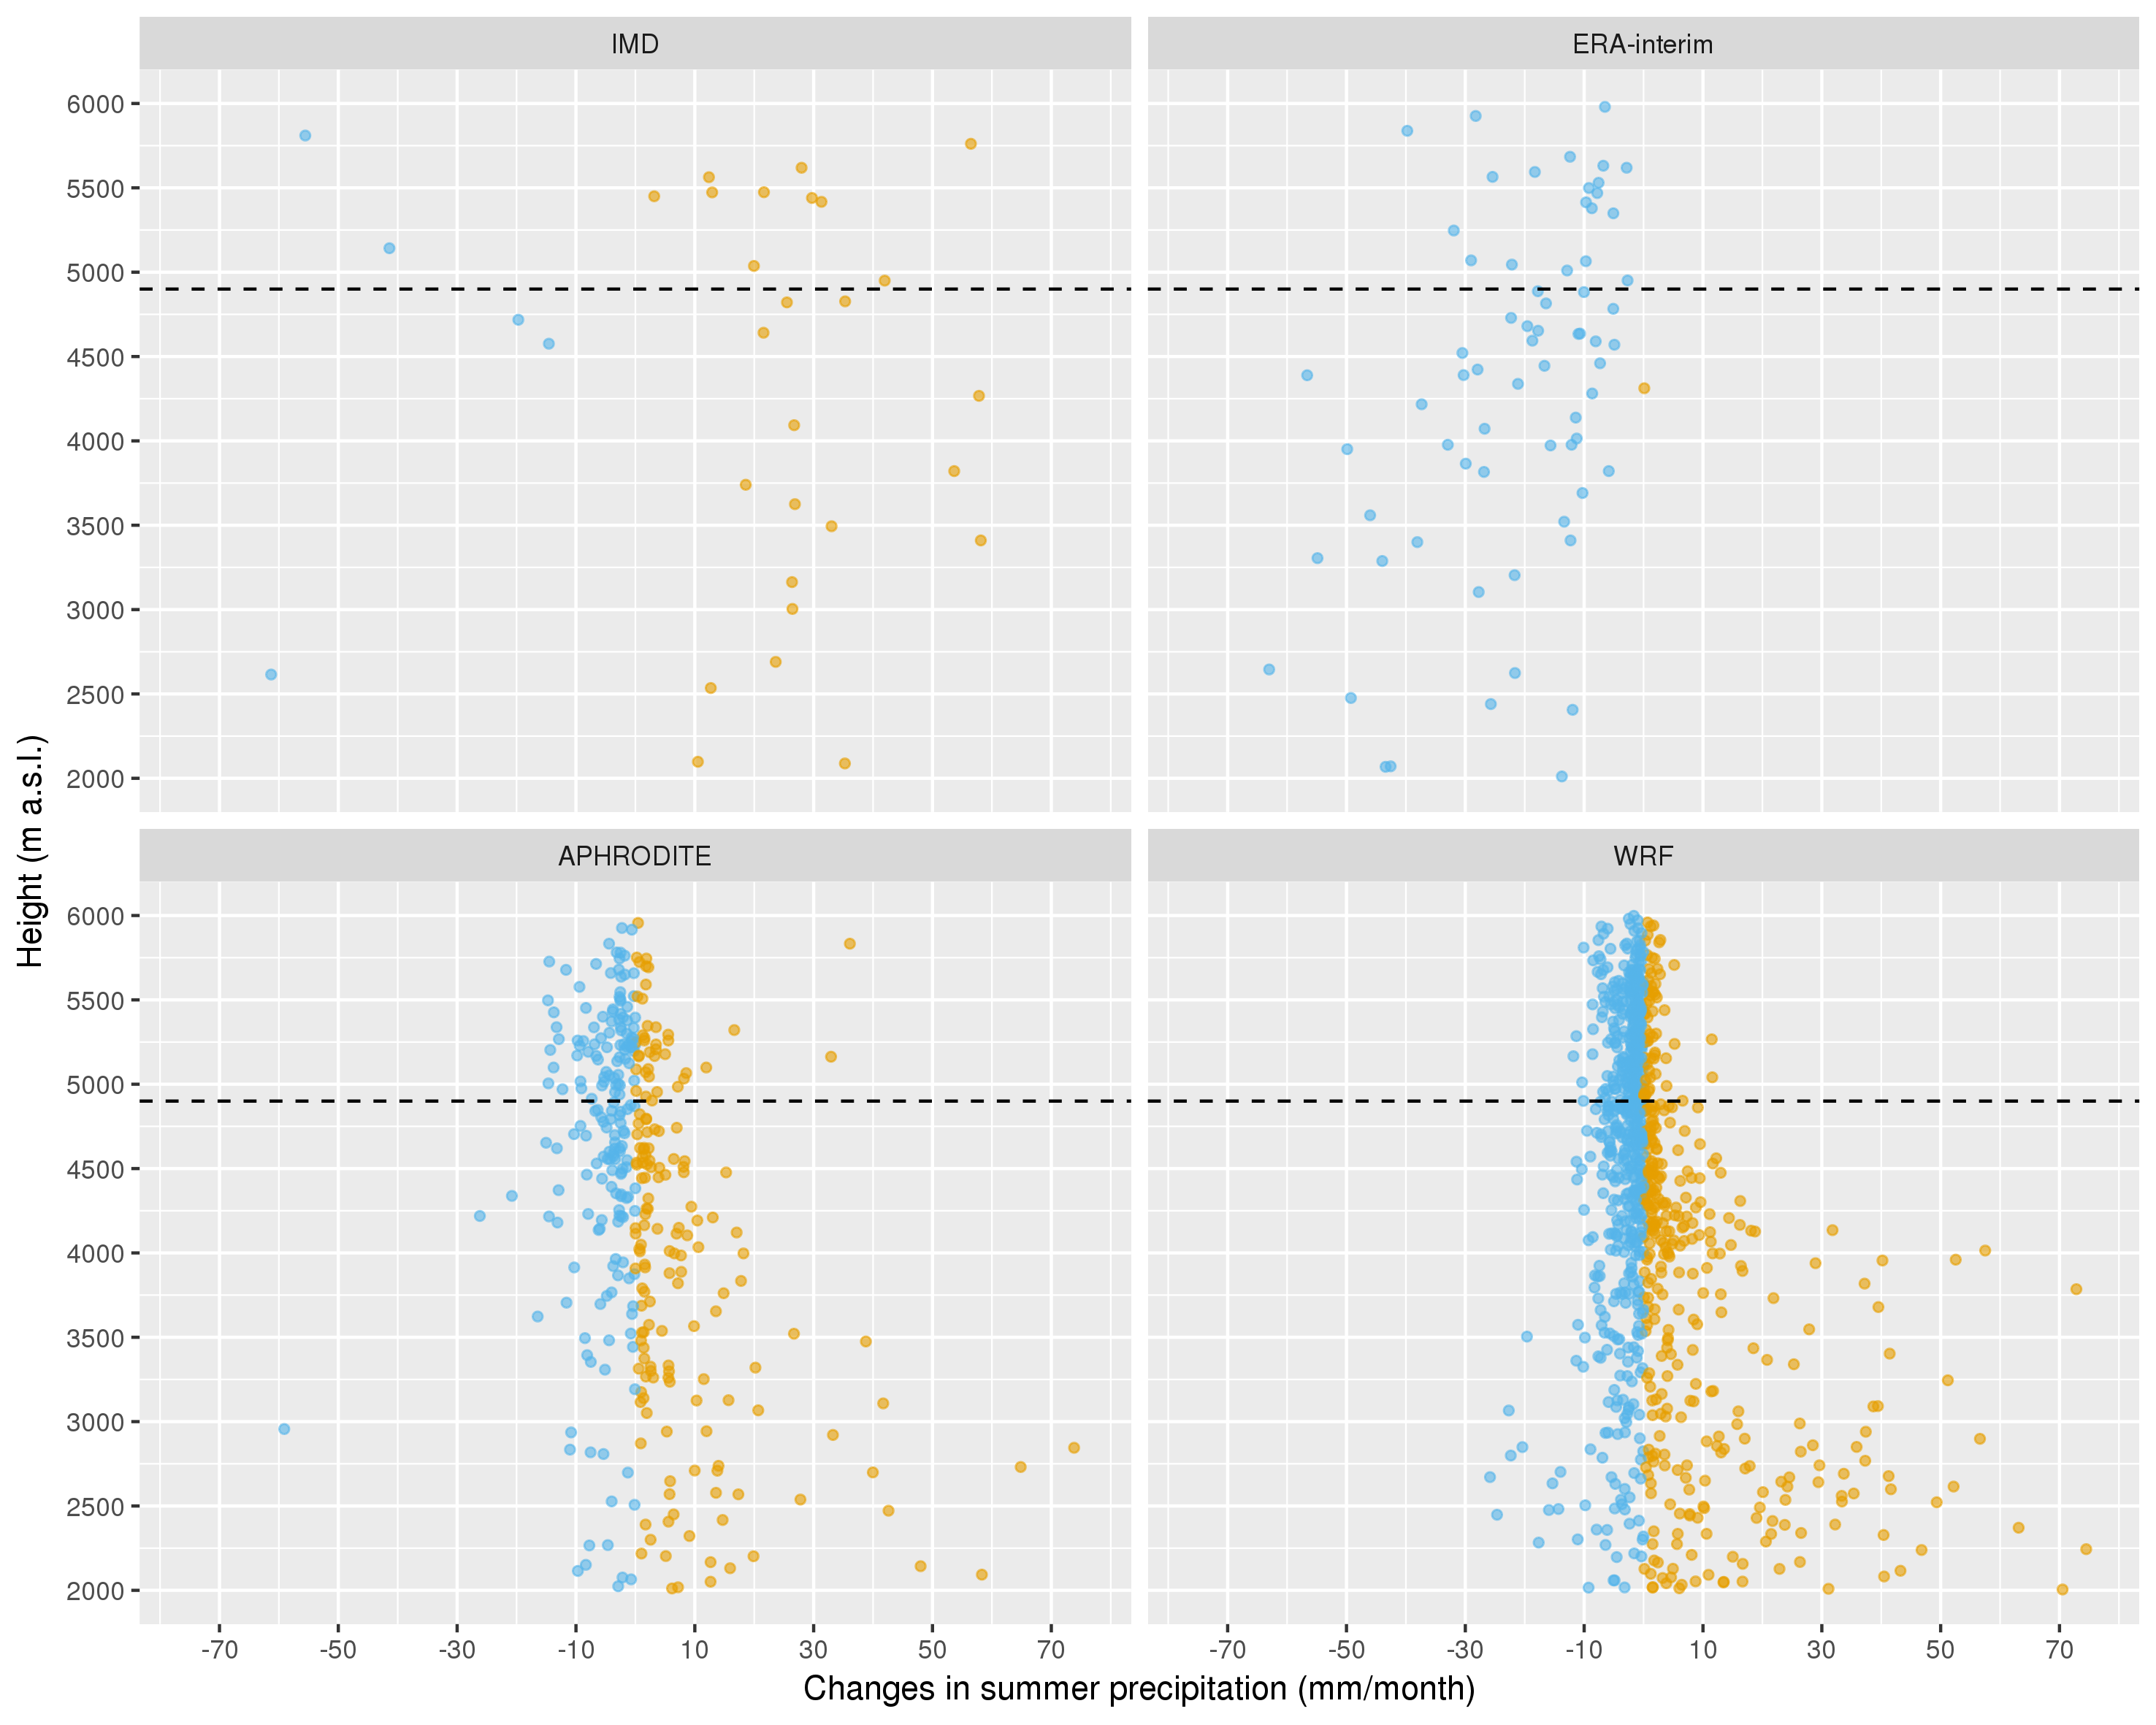

Supplement: Supplementary file 1 [file hess-22-5097-2018-supplement.zip › fig/summerHGT_Tp_Diff.png]
